# Supplementary material for: The first report on the assessment of maximum acceptable daily intake (MADI) of pesticides for humans using intelligent consensus predictions
Source: Royal Society of Chemistry journal article supplement (doi:10.1039/d4em00059e), 2024-01-01
Supplement: d4em00059e1.xlsx [file d4em00059e1.xlsx]

## Sheet: Author Information
				First report on the assessment of maximum acceptable daily intake (MADI) of pesticides for humans using intelligent consensus predictions
				Ankur Kumara, Probir Kumar Ojhaa,*, Kunal Royb,*
				aDrug Discovery and Development Laboratory,
				Department of Pharmaceutical Technology, Jadavpur University,
				Kolkata 700032, India
				bDrug Theoretics and Cheminformatics (DTC) Laboratory,
				Department of Pharmaceutical Technology, Jadavpur University,
				Kolkata 700032, India
				*Correspondence to: Probir Kumar Ojha (probirojha@yahoo.co.in); Kunal Roy (kunal.roy@jadavpuruniversity.in)

## Sheet: DATASETS
S.No.	compound	CAS NUMBER	SMILE	IUPAC	Maximum acceptable Compound daily intake for man Remarks WHO/FAQ references (mg/kg body weight)	pMADI
1	azinphos-methyl	86-50-0	COP(=S)(OC)SCN1C(=O)C2=CC=CC=C2N=N1	3-(dimethoxyphosphinothioylsulfanylmethyl)-1,2,3-benzotriazin-4-one	0.0025	5.10361
2	bromophos	2104-96-3	COP(=S)(OC)OC1=CC(=C(C=C1Cl)Br)Cl	(4-bromo-2,5-dichlorophenoxy)-dimethoxy-sulfanylidene-λ5-phosphane	0.006	4.78533
3	bromophos-ethyl	4824-78-6	CCOP(=S)(OCC)OC1=CC(=C(C=C1Cl)Br)Cl	(4-bromo-2,5-dichlorophenoxy)-diethoxy-sulfanylidene-λ5-phosphane	0.003	5.11844
4	carbaryl	63-25-2	CNC(=O)OC1=CC=CC2=CC=CC=C21	naphthalen-1-yl N-methylcarbamate	0.01	4.30371
5	carbophenothion	786-19-6	CCOP(=S)(OCC)SCSC1=CC=C(C=C1)Cl	(4-chlorophenyl)sulfanylmethylsulfanyl-diethoxy-sulfanylidene-λ5-phosphane	0.005	4.8362
6	chlorfenvinphos	470-90-6	CCOP(=O)(OCC)OC(=CCl)C1=C(C=C(C=C1)Cl)Cl	[(E)-2-chloro-1-(2,4-dichlorophenyl)ethenyl] diethyl phosphate	0.002	5.25477
7	chlorpyrifos	2921-88-2	CCOP(=S)(OCC)OC1=NC(=C(C=C1Cl)Cl)Cl	diethoxy-sulfanylidene-(3,5,6-trichloropyridin-2-yl)oxy-λ5-phosphane	0.0015	5.36872
8	chlorpyrifos-methyl	5598-13-0	COP(=S)(OC)OC1=NC(=C(C=C1Cl)Cl)Cl	dimethoxy-sulfanylidene-(3,5,6-trichloropyridin-2-yl)oxy-λ5-phosphane	0.01	4.50858
9	coumaphos	56-72-4	CCOP(=S)(OCC)OC1=CC2=C(C=C1)C(=C(C(=O)O2)Cl)C	3-chloro-7-diethoxyphosphinothioyloxy-4-methylchromen-2-one	0.0005	5.86069
10	crufomate (2-chloro-4- (1,1 -dimethylethyl) phenyl methyl methylphosphoramidate)	299-86-5	CC(C)(C)C1=CC(=C(C=C1)OP(=O)(NC)OC)Cl	N-[(4-tert-butyl-2-chlorophenoxy)-methoxyphosphoryl]methanamine	0.1	3.465
11	cyanofenphos (0-(4-cyanophenyl) O-ethyl phenylphosphonothioate)	13067-93-1	CCOP(=S)(C1=CC=CC=C1)OC2=CC=C(C=C2)C#N	4-[ethoxy(phenyl)phosphinothioyl]oxybenzonitrile	0.005	4.78296
12	demeton-S and related compounds	126-75-0	CCOP(=O)(OCC)SCCSCC	1-diethoxyphosphorylsulfanyl-2-ethylsulfanylethane	0.005	4.71329
13	diazinon	333-41-5	CCOP(=S)(OCC)OC1=NC(=NC(=C1)C)C(C)C	diethoxy-(6-methyl-2-propan-2-ylpyrimidin-4-yl)oxy-sulfanylidene-λ5-phosphane	0.002	5.1824
14	dichlorvos	62-73-7	COP(=O)(OC)OC=C(Cl)Cl	2,2-dichloroethenyl dimethyl phosphate	0.004	4.74229
15	dimethoate	60-51-5	CNC(=O)CSP(=S)(OC)OC	2-dimethoxyphosphinothioylsulfanyl-N-methylacetamide	0.02	4.05936
16	dioxathion	78-34-2	CCOP(=S)(OCC)SC1C(OCCO1)SP(=S)(OCC)OCC	(3-diethoxyphosphinothioylsulfanyl-1,4-dioxan-2-yl)sulfanyl-diethoxy-sulfanylidene-λ5-phosphane	0.0015	5.48344
17	disulfoton	298-04-4	CCOP(=S)(OCC)SCCSCC	diethoxy-(2-ethylsulfanylethylsulfanyl)-sulfanylidene-λ5-phosphane	0.002	5.13743
18	ethion	563-12-2	CCOP(=S)(OCC)SCSP(=S)(OCC)OCC	diethoxyphosphinothioylsulfanylmethylsulfanyl-diethoxy-sulfanylidene-λ5-phosphane	0.005	4.88596
19	fenamiphos (ethyl 3-methyl-4-(methylthio)phenyl (1 -methylethyl)phosphoramidate.)	22224-92-6	CCOP(=O)(NC(C)C)OC1=CC(=C(C=C1)SC)C	N-[ethoxy-(3-methyl-4-methylsulfanylphenoxy)phosphoryl]propan-2-amine	0.0006	5.70386
20	fenchlorphos	299-84-3	COP(=S)(OC)OC1=CC(=C(C=C1Cl)Cl)Cl	dimethoxy-sulfanylidene-(2,4,5-trichlorophenoxy)-λ5-phosphane	0.01	4.50725
21	fenitrothion	122-14-5	CC1=C(C=CC(=C1)OP(=S)(OC)OC)[N+](=O)[O-]	dimethoxy-(3-methyl-4-nitrophenoxy)-sulfanylidene-λ5-phosphane	0.005	4.74392
22	fensulfothion	115-90-2	CCOP(=S)(OCC)OC1=CC=C(C=C1)S(=O)C	diethoxy-(4-methylsulfinylphenoxy)-sulfanylidene-λ5-phosphane	0.0003	6.01198
23	fenthion	55-38-9	CC1=C(C=CC(=C1)OP(=S)(OC)OC)SC	dimethoxy-(3-methyl-4-methylsulfanylphenoxy)-sulfanylidene-λ5-phosphane	0.0005	5.74564
24	formothion	2540-82-1	CN(C=O)C(=O)CSP(=S)(OC)OC	2-dimethoxyphosphinothioylsulfanyl-N-formyl-N-methylacetamide	0.02	4.10941
25	leptophos (0. (4-bromo-2,5-dichlorophenyl) 0-methyl phenylphosphonothioate)	21609-90-5	COP(=S)(C1=CC=CC=C1)OC2=CC(=C(C=C2Cl)Br)Cl	(4-bromo-2,5-dichlorophenoxy)-methoxy-phenyl-sulfanylidene-λ5-phosphane	0.001	5.61497
26	malathion	121-75-5	CCOC(=O)CC(C(=O)OCC)SP(=S)(OC)OC	diethyl 2-dimethoxyphosphinothioylsulfanylbutanedioate	0.02	4.21801
27	methidathion	950-37-8	COC1=NN(C(=O)S1)CSP(=S)(OC)OC	3-(dimethoxyphosphinothioylsulfanylmethyl)-5-methoxy-1,3,4-thiadiazol-2-one	0.005	4.78157
28	mevinphos	7786-34-7	CC(=CC(=O)OC)OP(=O)(OC)OC	methyl (E)-3-dimethoxyphosphoryloxybut-2-enoate	0.0015	5.17449
29	monocrotophos	6923-22-4	CC(=CC(=O)NC)OP(=O)(OC)OC	dimethyl [(E)-4-(methylamino)-4-oxobut-2-en-2-yl] phosphate	0.0006	5.57052
30	omethoate	1113-02-6	CNC(=O)CSP(=O)(OC)OC	2-dimethoxyphosphorylsulfanyl-N-methylacetamide	0.0005	5.62986
31	parathion	56-38-2	CCOP(=S)(OCC)OC1=CC=C(C=C1)[N+](=O)[O-]	diethoxy-(4-nitrophenoxy)-sulfanylidene-λ5-phosphane	0.005	4.76536
32	parathion-methyl	298-00-0	COP(=S)(OC)OC1=CC=C(C=C1)[N+](=O)[O-]	dimethoxy-(4-nitrophenoxy)-sulfanylidene-λ5-phosphane	0.001	5.42034
33	phosalone	2310-17-0	CCOP(=S)(OCC)SCN1C2=C(C=C(C=C2)Cl)OC1=O	6-chloro-3-(diethoxyphosphinothioylsulfanylmethyl)-1,3-benzoxazol-2-one	0.006	4.78751
34	phosphamidon	13171-21-6	CCN(CC)C(=O)C(=C(C)OP(=O)(OC)OC)Cl	[(Z)-3-chloro-4-(diethylamino)-4-oxobut-2-en-2-yl] dimethyl phosphate	0.001	5.47672
35	pirimiphos-methyl	29232-93-7	CCN(CC)C1=NC(=CC(=N1)OP(=S)(OC)OC)C	4-dimethoxyphosphinothioyloxy-N,N-diethyl-6-methylpyrimidin-2-amine	0.005	4.78587
36	propoxur	114-26-1	CC(C)OC1=CC=CC=C1OC(=O)NC	(2-propan-2-yloxyphenyl) N-methylcarbamate	0.02	4.01968
37	thiometon	640-15-3	CCSCCSP(=S)(OC)OC	2-ethylsulfanylethylsulfanyl-dimethoxy-sulfanylidene-λ5-phosphane	0.005	4.69265
38	thiophanate-methyl	23564-05-8	COC(=O)NC(=S)NC1=CC=CC=C1NC(=S)NC(=O)OC	methyl N-[[2-(methoxycarbonylcarbamothioylamino)phenyl]carbamothioyl]carbamate	0.08	3.63149
39	trichlorfon	52-68-6	COP(=O)(C(C(Cl)(Cl)Cl)O)OC	2,2,2-trichloro-1-dimethoxyphosphorylethanol	0.01	4.41068

## Sheet: M1
		Training set
No.	nR=Cs	SdssC	B01[S-P]	B06[S-P]	F05[O-S]	pMADI
10	0	0	0	0	0	3.465
4	0	-0.452451	0	0	0	4.30371
21	0	0	1	0	0	4.74392
27	0	0.131335	1	0	1	4.78157
32	0	0	1	0	0	5.42034
34	2	-0.535604	0	0	0	5.47672
15	0	-0.0802546	1	0	1	4.05936
39	0	0	0	0	0	4.41068
37	0	0	1	0	2	4.69265
12	0	0	1	0	3	4.71329
28	2	-0.523019	0	0	0	5.17449
29	2	-0.210519	0	0	0	5.57052
30	0	-0.213588	1	0	0	5.62986
26	0	-1.00862	1	0	2	4.21801
33	0	-0.44971	1	0	0	4.78751
5	0	0	1	0	0	4.8362
18	0	0	1	0	0	4.88596
16	0	0	1	1	6	5.48344
19	0	0	0	1	1	5.70386
23	0	0	1	1	1	5.74564
22	0	0	1	1	1	6.01198
20	0	0	1	0	0	4.50725
2	0	0	1	0	0	4.78533
3	0	0	1	0	0	5.11844
6	1	0.0820062	0	0	0	5.25477
25	0	0	1	0	0	5.61497
38	0	-1.28007	0	0	0	3.63149
11	0	0	1	0	0	4.78296
13	0	0	1	0	0	5.1824
	Test set
No.	nR=Cs	SdssC	B01[S-P]	B06[S-P]	F05[O-S]	pMADI
36	0	-0.504809	0	0	0	4.01968
1	0	-0.201985	1	0	0	5.10361
24	0	-0.325625	1	0	2	4.10941
14	0	-0.167292	0	0	0	4.74229
35	0	0	1	0	0	4.78587
17	0	0	1	0	2	5.13743
9	1	0.15398	1	0	0	5.86069
8	0	0	1	0	0	4.50858
7	0	0	1	0	0	5.36872
31	0	0	1	0	0	4.76536

## Sheet: M2
	Training set
No.	nR=Cs	nROR	SdssC	B01[S-P]	B06[S-P]	pMADI
10	0	0	0	0	0	3.465
4	0	0	-0.452451	0	0	4.30371
21	0	0	0	1	0	4.74392
27	0	1	0.131335	1	0	4.78157
32	0	0	0	1	0	5.42034
34	2	0	-0.535604	0	0	5.47672
15	0	0	-0.0802546	1	0	4.05936
39	0	0	0	0	0	4.41068
37	0	0	0	1	0	4.69265
12	0	0	0	1	0	4.71329
28	2	0	-0.523019	0	0	5.17449
29	2	0	-0.210519	0	0	5.57052
30	0	0	-0.213588	1	0	5.62986
26	0	0	-1.00862	1	0	4.21801
33	0	0	-0.44971	1	0	4.78751
5	0	0	0	1	0	4.8362
18	0	0	0	1	0	4.88596
16	0	2	0	1	1	5.48344
19	0	0	0	0	1	5.70386
23	0	0	0	1	1	5.74564
22	0	0	0	1	1	6.01198
20	0	0	0	1	0	4.50725
2	0	0	0	1	0	4.78533
3	0	0	0	1	0	5.11844
6	1	0	0.0820062	0	0	5.25477
25	0	0	0	1	0	5.61497
38	0	0	-1.28007	0	0	3.63149
11	0	0	0	1	0	4.78296
13	0	0	0	1	0	5.1824
	Test set
No.	nR=Cs	nROR	SdssC	B01[S-P]	B06[S-P]	pMADI
36	0	0	-0.504809	0	0	4.01968
1	0	0	-0.201985	1	0	5.10361
24	0	0	-0.325625	1	0	4.10941
14	0	0	-0.167292	0	0	4.74229
35	0	0	0	1	0	4.78587
17	0	0	0	1	0	5.13743
9	1	0	0.15398	1	0	5.86069
8	0	0	0	1	0	4.50858
7	0	0	0	1	0	5.36872
31	0	0	0	1	0	4.76536

## Sheet: M3
	Training set
No.	nR=Cs	B01[S-P]	B06[S-P]	F05[N-S]	F05[O-S]	pMADI
10	0	0	0	0	0	3.465
4	0	0	0	0	0	4.30371
21	0	1	0	0	0	4.74392
27	0	1	0	1	1	4.78157
32	0	1	0	0	0	5.42034
34	2	0	0	0	0	5.47672
15	0	1	0	1	1	4.05936
39	0	0	0	0	0	4.41068
37	0	1	0	0	2	4.69265
12	0	1	0	0	3	4.71329
28	2	0	0	0	0	5.17449
29	2	0	0	0	0	5.57052
30	0	1	0	0	0	5.62986
26	0	1	0	0	2	4.21801
33	0	1	0	0	0	4.78751
5	0	1	0	0	0	4.8362
18	0	1	0	0	0	4.88596
16	0	1	1	0	6	5.48344
19	0	0	1	0	1	5.70386
23	0	1	1	0	1	5.74564
22	0	1	1	0	1	6.01198
20	0	1	0	0	0	4.50725
2	0	1	0	0	0	4.78533
3	0	1	0	0	0	5.11844
6	1	0	0	0	0	5.25477
25	0	1	0	0	0	5.61497
38	0	0	0	2	0	3.63149
11	0	1	0	0	0	4.78296
13	0	1	0	0	0	5.1824
	Test set
No.	nR=Cs	B01[S-P]	B06[S-P]	F05[N-S]	F05[O-S]	pMADI
36	0	0	0	0	0	4.01968
1	0	1	0	1	0	5.10361
24	0	1	0	1	2	4.10941
14	0	0	0	0	0	4.74229
35	0	1	0	0	0	4.78587
17	0	1	0	0	2	5.13743
9	1	1	0	0	0	5.86069
8	0	1	0	0	0	4.50858
7	0	1	0	0	0	5.36872
31	0	1	0	0	0	4.76536

## Sheet: M4
	Training set
No.	nR=Cs	SdssC	B01[S-P]	B06[S-P]	F06[O-P]	pMADI
10	0	0	0	0	0	3.465
4	0	-0.452451	0	0	0	4.30371
21	0	0	1	0	0	4.74392
27	0	0.131335	1	0	1	4.78157
32	0	0	1	0	0	5.42034
34	2	-0.535604	0	0	0	5.47672
15	0	-0.0802546	1	0	0	4.05936
39	0	0	0	0	0	4.41068
37	0	0	1	0	0	4.69265
12	0	0	1	0	0	4.71329
28	2	-0.523019	0	0	0	5.17449
29	2	-0.210519	0	0	0	5.57052
30	0	-0.213588	1	0	0	5.62986
26	0	-1.00862	1	0	0	4.21801
33	0	-0.44971	1	0	0	4.78751
5	0	0	1	0	0	4.8362
18	0	0	1	0	0	4.88596
16	0	0	1	1	4	5.48344
19	0	0	0	1	0	5.70386
23	0	0	1	1	0	5.74564
22	0	0	1	1	0	6.01198
20	0	0	1	0	0	4.50725
2	0	0	1	0	0	4.78533
3	0	0	1	0	0	5.11844
6	1	0.0820062	0	0	0	5.25477
25	0	0	1	0	0	5.61497
38	0	-1.28007	0	0	0	3.63149
11	0	0	1	0	0	4.78296
13	0	0	1	0	0	5.1824
	Test set
No.	nR=Cs	SdssC	B01[S-P]	B06[S-P]	F06[O-P]	pMADI
36	0	-0.504809	0	0	0	4.01968
1	0	-0.201985	1	0	0	5.10361
24	0	-0.325625	1	0	1	4.10941
14	0	-0.167292	0	0	0	4.74229
35	0	0	1	0	0	4.78587
17	0	0	1	0	0	5.13743
9	1	0.15398	1	0	0	5.86069
8	0	0	1	0	0	4.50858
7	0	0	1	0	0	5.36872
31	0	0	1	0	0	4.76536

## Sheet: M5
	Training set
No.	nR=Cs	T(O..S)	B01[S-P]	B02[C-C]	B06[S-P]	pMADI
10	0	0	0	1	0	3.465
4	0	0	0	1	0	4.30371
21	0	22	1	1	0	4.74392
27	0	46	1	1	0	4.78157
32	0	22	1	1	0	5.42034
34	2	0	0	1	0	5.47672
15	0	16	1	1	0	4.05936
39	0	0	0	0	0	4.41068
37	0	18	1	1	0	4.69265
12	0	21	1	1	0	4.71329
28	2	0	0	1	0	5.17449
29	2	0	0	1	0	5.57052
30	0	9	1	1	0	5.62986
26	0	44	1	1	0	4.21801
33	0	28	1	1	0	4.78751
5	0	16	1	1	0	4.8362
18	0	56	1	0	0	4.88596
16	0	92	1	1	1	5.48344
19	0	19	0	1	1	5.70386
23	0	25	1	1	1	5.74564
22	0	33	1	1	1	6.01198
20	0	6	1	1	0	4.50725
2	0	6	1	1	0	4.78533
3	0	6	1	1	0	5.11844
6	1	0	0	1	0	5.25477
25	0	4	1	1	0	5.61497
38	0	52	0	1	0	3.63149
11	0	4	1	1	0	4.78296
13	0	6	1	1	0	5.1824
	Test set
No.	nR=Cs	T(O..S)	B01[S-P]	B02[C-C]	B06[S-P]	pMADI
36	0	0	0	1	0	4.01968
1	0	18	1	1	0	5.10361
24	0	28	1	1	0	4.10941
14	0	0	0	0	0	4.74229
35	0	6	1	1	0	4.78587
17	0	18	1	1	0	5.13743
9	1	20	1	1	0	5.86069
8	0	6	1	1	0	4.50858
7	0	6	1	1	0	5.36872
31	0	22	1	1	0	4.76536

## Sheet: PPDB_M1
TestCompNo	chemical name	smile	Score(MAE-LOO)	Score(Proximity Train YObs Mean)	Score(Similarity based AD)	CompositeScore	PredictionQuality	YPred(Test)	AD status	Closest Training Compound	Euclidean Distance	Generalized Jaccard Coeff.
1377	Propetamphos	CCNP(=S)(OC)OC(=CC(=O)OC(C)C)C	1	2	3	2	Moderate	6.32409	In	29	0.500891	0.616026
1430	Pyridafenthion	CCOP(=S)(OCC)OC1=NN(C(=O)C=C1)C2=CC=CC=C2	1	2	3	2	Moderate	6.32406	In	29	0.500888	0.616037
107	Amidothioate	CCNP(=S)(OC)OC1=C(C=C(C=C1)SC)Cl	1	3	3	2	Moderate	6.0729	In	23	0	1
761	Fensulfothion	CCOP(=S)(OCC)OC1=CC=C(C=C1)S(=O)C	1	3	3	2	Moderate	6.0729	In	23	0	1
764	Fenthion	CC1=C(C=CC(=C1)OP(=S)(OC)OC)SC	1	3	3	2	Moderate	6.0729	In	23	0	1
765	Fenthion sulfoxide	CC1=C(C=CC(=C1)OP(=S)(OC)OC)S(=O)C	1	3	3	2	Moderate	6.0729	In	23	0	1
766	Fenthion-ethyl	CCOP(=S)(OCC)OC1=CC(=C(C=C1)SC)C	1	3	3	2	Moderate	6.0729	In	23	0	1
1532	Sulprofos	CCCSP(=S)(OCC)OC1=CC=C(C=C1)SC	1	3	3	2	Moderate	6.0729	In	23	0	1
413	Cloproxydim	CCCC(=C1C(=O)CC(CC1=O)CC(C)SCC)NOCC=CCl	1	3	3	2	Moderate	5.98407	In	29	0.353533	0.712573
1428	Pyridaben	CC(C)(C)C1=CC=C(C=C1)CSC2=C(C(=O)N(N=C2)C(C)(C)C)Cl	1	3	3	2	Moderate	5.95897	In	29	0.332967	0.724691
398	Clethodim	CCC(=C1C(=O)CC(CC1=O)CC(C)SCC)NOCC=CCl	1	3	3	2	Moderate	5.95211	In	29	0.327348	0.728073
1552	Tepraloxydim	CCC(=C1C(=O)CC(CC1=O)C2CCOCC2)NOCC=CCl	1	3	3	2	Moderate	5.94725	In	29	0.323372	0.730486
1551	Temephos	COP(=S)(OC)OC1=CC=C(C=C1)SC2=CC=C(C=C2)OP(=S)(OC)OC	1	3	3	2	Moderate	5.94101	In	23	0.093583	0.948564
1678	Uniconazole	CC(C)(C)C(C(=CC1=CC=C(C=C1)Cl)N2C=NC=N2)O	1	3	3	2	Moderate	5.93572	In	29	0.31392	0.736286
560	Dieldrin	C1C2C3C(C1C4C2O4)C5(C(=C(C3(C5(Cl)Cl)Cl)Cl)Cl)Cl	1	3	3	2	Moderate	5.92028	In	29	0.301276	0.744191
654	Endrin	C1C2C3C(C1C4C2O4)C5(C(=C(C3(C5(Cl)Cl)Cl)Cl)Cl)Cl	1	3	3	2	Moderate	5.92028	In	29	0.301276	0.744191
602	Diniconazole	CC(C)(C)C(C(=CC1=C(C=C(C=C1)Cl)Cl)N2C=NC=N2)O	1	3	3	2	Moderate	5.90253	In	29	0.286738	0.753492
603	Diniconazole-M	CC(C)(C)C(C(=CC1=C(C=C(C=C1)Cl)Cl)N2C=NC=N2)O	1	3	3	2	Moderate	5.90253	In	29	0.286738	0.753492
237	Bromocyclen	C1C(C2(C(=C(C1(C2(Cl)Cl)Cl)Cl)Cl)Cl)CBr	1	3	3	2	Moderate	5.87272	In	29	0.262317	0.769651
655	Enoxastrobin	CC(=NOCC1=CC=CC=C1C(=COC)C(=O)OC)C=CC2=CC=C(C=C2)Cl	1	3	3	2	Moderate	5.87109	In	29	0.260978	0.770557
964	Hymexazol	CC1=CC(=O)NO1	1	3	3	2	Moderate	5.82997	In	29	0.227295	0.794072
713	Fenaminstrobin	CC(=NOCC1=CC=CC=C1C(=NOC)C(=O)NC)C=CC2=C(C=CC=C2Cl)Cl	1	3	3	2	Moderate	5.82188	In	29	0.220669	0.798867
247	Brompyrazon	C1=CC=C(C=C1)N2C(=O)C(=C(C=N2)N)Br	1	3	3	2	Moderate	5.82088	In	29	0.219848	0.799466
329	Chlordane	C1C2C(C(C1Cl)Cl)C3(C(=C(C2(C3(Cl)Cl)Cl)Cl)Cl)Cl	1	3	3	2	Moderate	5.81308	In	29	0.213463	0.804149
230	Bromacil	CCC(C)N1C(=O)C(=C(NC1=O)C)Br	1	3	3	2	Moderate	5.81204	In	29	0.212609	0.80478
231	Bromacil-dimethylammonium	CCC(C)N1C(=O)NC(C)=C(Br)C1=O	1	3	3	2	Moderate	5.81204	In	29	0.212609	0.80478
549	Diclomezine	CC1=C(C=C(C=C1Cl)C2=NNC(=O)C=C2)Cl	1	3	3	2	Moderate	5.80958	In	29	0.210598	0.806268
1022	Isocil	CC1=C(C(=O)N(C(=O)N1)C(C)C)Br	1	3	3	2	Moderate	5.7889	In	29	0.193652	0.819036
326	Chlorbicyclen	C(C1C(C2(C(=C(C1(C2(Cl)Cl)Cl)Cl)Cl)Cl)CCl)Cl	1	3	3	2	Moderate	5.78133	In	29	0.187453	0.823808
94	Alpha-endosulfan	C1C2C(COS(=O)O1)C3(C(=C(C2(C3(Cl)Cl)Cl)Cl)Cl)Cl	1	3	3	2	Moderate	5.73382	In	29	0.148537	0.855085
202	Beta-endosulfan	C1C2C(COS(=O)O1)C3(C(=C(C2(C3(Cl)Cl)Cl)Cl)Cl)Cl	1	3	3	2	Moderate	5.73382	In	29	0.148537	0.855085
651	Endosulfan	C1C2C(COS(=O)O1)C3(C(=C(C2(C3(Cl)Cl)Cl)Cl)Cl)Cl	1	3	3	2	Moderate	5.73382	In	29	0.148537	0.855085
1018	Isobenzan	C12C(C(OC1Cl)Cl)C3(C(=C(C2(C3(Cl)Cl)Cl)Cl)Cl)Cl	1	3	3	2	Moderate	5.73281	In	29	0.147709	0.855777
598	Dimidazon	COC1=C(C(=O)N(N=C1)C2=CC=CC=C2)OC	1	3	3	2	Moderate	5.69483	In	29	0.116596	0.882589
438	Crotamiton	CCN(C1=CC=CC=C1C)C(=O)C=CC	1	3	3	2	Moderate	5.65898	In	29	0.0872269	0.909486
18	1,3-butadiene	C=CC=C	1	3	3	2	Moderate	5.64328	In	29	0.0743715	0.921783
588	Dimethipin	CC1=C(S(=O)(=O)CCS1(=O)=O)C	1	3	3	2	Moderate	5.63829	In	29	0.0702827	0.925764
857	Flupyradifurone	C1C(=CC(=O)O1)N(CC2=CN=C(C=C2)Cl)CC(F)F	1	3	3	2	Moderate	5.61483	In	29	0.0510642	0.944946
86	Allidochlor	C=CCN(CC=C)C(=O)CCl	1	3	3	2	Moderate	5.60394	In	29	0.0421405	0.954125
556	Dicrotophos	CC(=CC(=O)N(C)C)OP(=O)(OC)OC	1	3	3	2	Moderate	5.59816	In	29	0.0374048	0.95907
263	Butenachlor	CCC1=C(C(=CC=C1)CC)N(COCC=CC)C(=O)CCl	1	3	3	2	Moderate	5.58648	In	29	0.0278386	0.969215
391	Cinidon-ethyl	CCOC(=O)C(=CC1=C(C=CC(=C1)N2C(=O)C3=C(C2=O)CCCC3)Cl)Cl	1	3	3	2	Moderate	5.58182	In	29	0.0240186	0.973327
1207	Monocrotophos	C/C(=C\C(=O)NC)/OP(=O)(OC)OC	1	3	3	2	Moderate	5.55249	In	29	0	1
351	Chloridazon	C1=CC=C(C=C1)N2C(=O)C(=C(C=N2)N)Cl	1	3	3	2	Moderate	5.54368	In	29	0.00721992	0.991762
927	Griseofulvin	CC1CC(=O)C=C(C12C(=O)C3=C(O2)C(=C(C=C3OC)OC)Cl)OC	1	3	3	2	Moderate	5.5193	In	29	0.0271913	0.968976
530	Dichlormid	C=CCN(CC=C)C(=O)C(Cl)Cl	1	3	3	2	Moderate	5.50477	In	29	0.0390914	0.955399
1163	Methocrotophos	CC(=CC(=O)N(C)OC)OP(=O)(OC)OC	1	3	3	2	Moderate	5.48743	In	29	0.0533023	0.939185
1554	Terbacil	CC1=C(C(=O)N(C(=O)N1)C(C)(C)C)Cl	1	3	3	2	Moderate	5.47218	In	28	0.0439827	0.944975
569	Difenopenten-ethyl	CCOC(=O)C=CC(C)OC1=CC=C(C=C1)OC2=CC=C(C=C2)C(F)(F)F	1	3	3	2	Moderate	5.4549	In	28	0.0300273	0.961766
90	Allyxycarb	CC1=CC(=CC(=C1N(CC=C)CC=C)C)OC(=O)NC	1	3	3	2	Moderate	5.44186	In	28	0.0194967	0.974837
290	Captan	C1C=CCC2C1C(=O)N(C2=O)SC(Cl)(Cl)Cl	1	3	3	2	Moderate	5.4242	In	28	0.00522834	0.993126
1198	Mevinphos	CC(=CC(=O)OC)OP(=O)(OC)OC	1	3	3	2	Moderate	5.41772	In	28	0	1
1250	Norflurazon	CNC1=C(C(=O)N(N=C1)C2=CC=CC(=C2)C(F)(F)F)Cl	1	3	3	2	Moderate	5.41473	In	34	0.0019651	0.997388
1321	Phosphamidon	CCN(CC)C(=O)C(=C(C)OP(=O)(OC)OC)Cl	1	3	3	2	Moderate	5.4123	In	34	0	1
289	Captafol	C1C=CCC2C1C(=O)N(C2=O)SC(C(Cl)Cl)(Cl)Cl	1	3	3	2	Moderate	5.4029	In	34	0.0075833	0.989894
1080	Maleic hydrazide	C1=CC(=O)NNC1=O	1	3	3	2	Moderate	5.38341	In	34	0.0233153	0.968927
1082	Maleic hydrazide potassium	C1=CC(=O)NNC1=O	1	3	3	2	Moderate	5.38341	In	34	0.0233153	0.968927
269	Butopyronoxyl	CCCCOC(=O)C1=CC(=O)CC(O1)(C)C	1	3	3	2	Moderate	5.37599	In	34	0.0293032	0.960947
1359	Profluthrin	CC=CC1C(C1(C)C)C(=O)OCC2=C(C(=C(C(=C2F)F)C)F)F	1	3	3	2	Moderate	5.36707	In	34	0.0364988	0.951357
1482	Sethoxydim	CCCC(=C1C(=O)CC(CC1=O)CC(C)SCC)NOCC	1	3	2	1	Bad/Unreliable	5.36205	In	6	0.346897	0.700729
714	Fenamiphos	CCOP(=O)(NC(C)C)OC1=CC(=C(C=C1)SC)C	1	3	3	2	Moderate	5.35952	In	19	0	1
1373	Propaphos	CCCOP(=O)(OCCC)OC1=CC=C(C=C1)SC	1	3	3	2	Moderate	5.35952	In	19	0	1
662	Epsilon-metofluthrin	C/C=C\[C@@H]1[C@H](C1(C)C)C(=O)OCC2=C(C(=C(C(=C2F)F)COC)F)F	1	3	3	2	Moderate	5.35924	In	34	0.0428175	0.942936
1185	Metofluthrin	CC=CC1C(C1(C)C)C(=O)OCC2=C(C(=C(C(=C2F)F)COC)F)F	1	3	3	2	Moderate	5.35924	In	34	0.0428175	0.942936
458	Cycloxaprid	C1CC2N3CCN(C3=C(C1O2)[N+](=O)[O-])CC4=CN=C(C=C4)Cl	1	3	2	1	Bad/Unreliable	5.3439	In	6	0.330363	0.710869
759	Fenridazon-propyl	CCCOC(=O)C1=NN(C(=CC1=O)C)C2=CC=C(C=C2)Cl	1	3	3	2	Moderate	5.32053	In	34	0.0740581	0.901301
606	Dinocap	CCCCCCC(C)C1=CC(=CC(=C1OC(=O)C=CC)[N+](=O)[O-])[N+](=O)[O-]	1	3	3	2	Moderate	5.3154	In	34	0.0782018	0.895779
1132	Meptyldinocap	CCCCCCC(C)C1=CC(=CC(=C1OC(=O)C=CC)[N+](=O)[O-])[N+](=O)[O-]	1	3	3	2	Moderate	5.3154	In	34	0.0782018	0.895779
477	Cyphenothrin	CC(=CC1C(C1(C)C)C(=O)OC(C#N)C2=CC(=CC=C2)OC3=CC=CC=C3)C	1	3	2	1	Bad/Unreliable	5.31296	In	6	0.302185	0.728842
1360	Profoxydim	CCCC(=C1C(=O)CC(CC1=O)C2CCCSC2)NOCC(C)OC3=CC=C(C=C3)Cl	1	3	2	1	Bad/Unreliable	5.30688	In	6	0.296645	0.732484
1081	Maleic hydrazide choline	C[N+](C)(C)CCO.C1=CC(=NNC1=O)[O-]	1	3	3	2	Moderate	5.30554	In	34	0.0861573	0.885176
1443	Pyrimorph	CC(C)(C)C1=CC=C(C=C1)C(=CC(=O)N2CCOCC2)C3=CC(=NC=C3)Cl	1	3	2	1	Bad/Unreliable	5.30417	In	6	0.294177	0.734118
1280	Oxycarboxin	CC1=C(S(=O)(=O)CCO1)C(=O)NC2=CC=CC=C2	1	3	3	2	Moderate	5.30414	In	34	0.0872904	0.883666
1055	Kadethrin	CC1(C(C1C(=O)OCC2=COC(=C2)CC3=CC=CC=C3)C=C4CCSC4=O)C	1	3	3	2	Moderate	5.2967	In	6	0.287375	0.738659
1223	N1,N2-diallyl-N2-dichloroacetylglycinamide	C=CCNC(=O)CN(CC=C)C(=O)C(Cl)Cl	1	3	3	2	Moderate	5.29031	In	34	0.0984455	0.8688
1412	Pyranocoumarin	CC1(CC(C2=C(O1)C3=CC=CC=C3OC2=O)C4=CC=CC=C4)OC	1	3	3	2	Moderate	5.27983	In	6	0.272009	0.749127
1510	Spinetoram	CCC1CCCC(C(C(=O)C2=CC3C(C2CC(=O)O1)CCC4C3CC(C4)OC5C(C(C(C(O5)C)OC)OCC)OC)C)OC6CCC(C(O6)C)N(C)C	1	3	3	2	Moderate	5.27332	In	6	0.266081	0.753246
591	Dimethomorph	COC1=C(C=C(C=C1)C(=CC(=O)N2CCOCC2)C3=CC=C(C=C3)Cl)OC	1	3	3	2	Moderate	5.27013	In	6	0.263175	0.755281
1616	Tralkoxydim	CCC(=C1C(=O)CC(CC1=O)C2=C(C=C(C=C2C)C)C)NOCC	1	3	3	2	Moderate	5.25994	In	6	0.253893	0.761857
87	Alloxydim	CCCC(=C1C(=O)CC(C(C1=O)C(=O)OC)(C)C)NOCC=C	1	3	3	2	Moderate	5.22472	In	34	0.151382	0.79825
272	Butroxydim	CCCC(=O)C1=C(C(=C(C=C1C)C)C2CC(=O)C(=C(CC)NOCC)C(=O)C2)C	1	3	3	2	Moderate	5.20841	In	6	0.206954	0.796944
945	Heptafluthrin	CC1(C(C1C(=O)OCC2=C(C(=C(C(=C2F)F)COC)F)F)C=CC(F)(F)F)C	1	3	3	2	Moderate	5.201	In	34	0.170524	0.772739
832	Flumorph	COC1=C(C=C(C=C1)C(=CC(=O)N2CCOCC2)C3=CC=C(C=C3)F)OC	1	3	3	2	Moderate	5.19734	In	6	0.196874	0.804905
568	Difenopenten	CC(C=CC(=O)O)OC1=CC=C(C=C1)OC2=CC=C(C=C2)C(F)(F)F	1	3	3	2	Moderate	5.18636	In	34	0.182341	0.75699
514	Di-allate	CC(C)N(C(C)C)C(=O)SCC(=CCl)Cl	1	3	3	2	Moderate	5.1731	In	6	0.174793	0.822911
984	Imicyafos	CCCSP(=O)(N1CCN(C1=NC#N)CC)OCC	1	3	3	2	Moderate	5.16754	In	27	0.197529	0.829282
1458	Quinoclamine	C1=CC=C2C(=C1)C(=O)C(=C(C2=O)Cl)N	1	3	3	2	Moderate	5.15557	In	34	0.20719	0.723873
190	Benzobicyclon	CS(=O)(=O)C1=CC(=C(C=C1)C(=O)C2=C(C3CCC(C3)C2=O)SC4=CC=CC=C4)Cl	1	3	3	2	Moderate	5.1536	In	6	0.15704	0.837983
1316	Phosametine	CN(C(=O)CNCP(=O)(O)O)S(=O)(=O)C	1	3	3	2	Moderate	5.15237	In	19	0.364916	0.651009
1431	Pyridafol	C1=CC=C(C=C1)C2=NNC(=CC2=O)Cl	1	3	3	2	Moderate	5.13935	In	6	0.144054	0.849363
500	Deltamethrin	CC1(C(C1C(=O)OC(C#N)C2=CC(=CC=C2)OC3=CC=CC=C3)C=C(Br)Br)C	1	3	3	2	Moderate	5.13327	In	6	0.138514	0.854311
875	Flutianil	COC1=CC=CC=C1N2CCSC2=C(C#N)SC3=C(C=CC(=C3)C(F)(F)F)F	1	3	3	2	Moderate	5.1136	In	6	0.257857	0.709148
579	Dimefluthrin	CC(=CC1C(C1(C)C)C(=O)OCC2=C(C(=C(C(=C2F)F)COC)F)F)C	1	3	3	2	Moderate	5.11011	In	6	0.117427	0.87369
1314	Phosacetim	CC(=NP(=S)(OC1=CC=C(C=C1)Cl)OC2=CC=C(C=C2)Cl)N	1	3	3	2	Moderate	5.08404	In	27	0.132319	0.879302
1628	Tri-allate	CC(C)N(C(C)C)C(=O)SCC(=C(Cl)Cl)Cl	1	3	3	2	Moderate	5.0754	In	6	0.0858082	0.904451
1509	Spidoxamat	CC1=CC(=CC(=C1C2=C(C3(CCC4(CC3)OCCO4)NC2=O)O)C)Cl	1	3	3	2	Moderate	5.06761	In	6	0.0787108	0.911655
234	Bromfenvinfos	CCOP(=O)(OCC)OC(=CBr)C1=C(C=C(C=C1)Cl)Cl	1	3	3	2	Moderate	5.04641	In	6	0.0594065	0.931846
1513	Spiromesifen	CC1=CC(=C(C(=C1)C)C2=C(C3(CCCC3)OC2=O)OC(=O)CC(C)(C)C)C	1	3	3	2	Moderate	5.03406	In	6	0.0481556	0.944031
1323	Phoxim	CCOP(=S)(OCC)ON=C(C#N)C1=CC=CC=C1	1	3	3	2	Moderate	5.01933	In	21	0.0646207	0.952727
461	Cyenopyrafen	CC1=C(N(N=C1C)C)C(=C(C#N)C2=CC=C(C=C2)C(C)(C)C)OC(=O)C(C)(C)C	1	3	3	2	Moderate	5.01591	In	6	0.0316215	0.962528
1259	Octhilinone	CCCCCCCCN1C(=O)C=CS1	1	3	3	2	Moderate	5.01313	In	6	0.029094	0.965419
1351	Probenazole	C=CCOC1=NS(=O)(=O)C2=CC=CC=C21	1	3	3	2	Moderate	5.00792	In	6	0.0243445	0.9709
344	Chlorfenvinphos	CCOP(=O)(OCC)OC(=CCl)C1=C(C=C(C=C1)Cl)Cl	1	3	3	2	Moderate	4.98119	In	6	0	1
1432	Pyridalyl	C1=CC(=NC=C1C(F)(F)F)OCCCOC2=C(C=C(C=C2Cl)OCC=C(Cl)Cl)Cl	1	3	3	2	Moderate	4.98011	In	6	0.000984	0.998789
1180	Methylisothiazoline	CN1C(=O)C=CS1	1	3	3	2	Moderate	4.97777	In	6	0.00311581	0.996164
596	Dimethylvinphos	COP(=O)(OC)OC(=CCl)C1=C(C=C(C=C1)Cl)Cl	1	3	3	2	Moderate	4.97193	In	6	0.00843814	0.989611
1085	Malonoben	CC(C)(C)C1=CC(=CC(=C1O)C(C)(C)C)C=C(C#N)C#N	1	3	3	2	Moderate	4.96995	In	6	0.0102416	0.987391
373	Chlorphoxim	CCOP(=S)(OCC)ON=C(C#N)C1=CC=CC=C1Cl	1	3	3	2	Moderate	4.96942	In	21	0.00861623	0.993428
1488	Silthiofam	CC1=C(SC(=C1C(=O)NCC=C)[Si](C)(C)C)C	1	3	3	2	Moderate	4.96546	In	6	0.0143273	0.982361
894	Fosmethilan	CCCC(=O)N(CSP(=S)(OC)OC)C1=CC=CC=C1Cl	1	3	3	2	Moderate	4.96448	In	21	0.00307179	0.997647
115	Amiprofos-methyl	CC1=CC(=C(C=C1)OP(=S)(NC(C)C)OC)[N+](=O)[O-]	1	3	3	2	Moderate	4.96174	In	21	0	1
117	Amiton	CCN(CC)CCSP(=O)(OCC)OCC	1	3	3	2	Moderate	4.96174	In	21	0	1
134	Aspon	CCCOP(=S)(OCCC)OP(=S)(OCCC)OCCC	1	3	3	2	Moderate	4.96174	In	21	0	1
151	Azothoate	COP(=S)(OC)OC1=CC=C(C=C1)N=NC2=CC=C(C=C2)Cl	1	3	3	2	Moderate	4.96174	In	21	0	1
240	Bromophos	COP(=S)(OC)OC1=CC(=C(C=C1Cl)Br)Cl	1	3	3	2	Moderate	4.96174	In	21	0	1
241	Bromophos-ethyl	CCOP(=S)(OCC)OC1=CC(=C(C=C1Cl)Br)Cl	1	3	3	2	Moderate	4.96174	In	21	0	1
259	Butamifos	CCC(C)NP(=S)(OCC)OC1=C(C=CC(=C1)C)[N+](=O)[O-]	1	3	3	2	Moderate	4.96174	In	21	0	1
262	Butathiofos	CCOP(=S)(OCC)OC1=CN=C(N=C1)C(C)(C)C	1	3	3	2	Moderate	4.96174	In	21	0	1
277	Cadusafos	CCC(C)SP(=O)(OCC)SC(C)CC	1	3	3	2	Moderate	4.96174	In	21	0	1
301	Carbophenothion	CCOP(=S)(OCC)SCSC1=CC=C(C=C1)Cl	1	3	3	2	Moderate	4.96174	In	21	0	1
334	Chlorethoxyfos	CCOP(=S)(OCC)OC(C(Cl)(Cl)Cl)Cl	1	3	3	2	Moderate	4.96174	In	21	0	1
355	Chlormephos	CCOP(=S)(OCC)SCCl	1	3	3	2	Moderate	4.96174	In	21	0	1
374	Chlorprazophos	CCOP(=S)(OCC)OC1=NN2C(=CC=NC2=C1Cl)C	1	3	3	2	Moderate	4.96174	In	21	0	1
377	Chlorpyrifos	CCOP(=S)(OCC)OC1=NC(=C(C=C1Cl)Cl)Cl	1	3	3	2	Moderate	4.96174	In	21	0	1
378	Chlorpyrifos-methyl	COP(=S)(OC)OC1=NC(=C(C=C1Cl)Cl)Cl	1	3	3	2	Moderate	4.96174	In	21	0	1
385	Chlorthion	COP(=S)(OC)OC1=CC(=C(C=C1)[N+](=O)[O-])Cl	1	3	3	2	Moderate	4.96174	In	21	0	1
386	Chlorthiophos	CCOP(=S)(OCC)OC1=CC(=C(C=C1Cl)Cl)SC	1	3	3	2	Moderate	4.96174	In	21	0	1
443	Cyanophos	COP(=S)(OC)OC1=CC=C(C=C1)C#N	1	3	3	2	Moderate	4.96174	In	21	0	1
518	Diazinon	CCOP(=S)(OCC)OC1=NC(=NC(=C1)C)C(C)C	1	3	3	2	Moderate	4.96174	In	21	0	1
527	Dichlofenthion	CCOP(=S)(OCC)OC1=C(C=C(C=C1)Cl)Cl	1	3	3	2	Moderate	4.96174	In	21	0	1
564	Dietholate	CCOP(=S)(OCC)OC1=CC=CC=C1	1	3	3	2	Moderate	4.96174	In	21	0	1
617	Dioxabenzophos	COP1(=S)OCC2=CC=CC=C2O1	1	3	3	2	Moderate	4.96174	In	21	0	1
647	Edifenphos	CCOP(=O)(SC1=CC=CC=C1)SC2=CC=CC=C2	1	3	3	2	Moderate	4.96174	In	21	0	1
656	EPBP	S=P(OC1=CC=C(Cl)C=C1Cl)(OCC)C=2C=CC=CC2	1	3	3	2	Moderate	4.96174	In	21	0	1
658	EPN	CCOP(=S)(C1=CC=CC=C1)OC2=CC=C(C=C2)[N+](=O)[O-]	1	3	3	2	Moderate	4.96174	In	21	0	1
670	Etaphos	CCCSP(=O)(OCC)OC1=C(C=C(C=C1)Cl)Cl	1	3	3	2	Moderate	4.96174	In	21	0	1
682	Ethion	CCOP(=S)(OCC)SCSP(=S)(OCC)OCC	1	3	3	2	Moderate	4.96174	In	21	0	1
689	Ethoprophos	CCCSP(=O)(OCC)SCCC	1	3	3	2	Moderate	4.96174	In	21	0	1
709	Etrimfos	CCC1=NC(=CC(=N1)OP(=S)(OC)OC)OCC	1	3	3	2	Moderate	4.96174	In	21	0	1
724	Fenchlorphos	COP(=S)(OC)OC1=CC(=C(C=C1Cl)Cl)Cl	1	3	3	2	Moderate	4.96174	In	21	0	1
731	Fenitrothion	CC1=C(C=CC(=C1)OP(=S)(OC)OC)[N+](=O)[O-]	1	3	3	2	Moderate	4.96174	In	21	0	1
884	Fonofos	CCOP(=S)(CC)SC1=CC=CC=C1	1	3	3	2	Moderate	4.96174	In	21	0	1
948	Heterophos	CCCSP(=O)(OCC)OC1=CC=CC=C1	1	3	3	2	Moderate	4.96174	In	21	0	1
958	Hexylthiofos	CCOP(=O)(OC1CCCCC1)SCC	1	3	3	2	Moderate	4.96174	In	21	0	1
996	Inezin	CCOP(=O)(C1=CC=CC=C1)SCC2=CC=CC=C2	1	3	3	2	Moderate	4.96174	In	21	0	1
999	Iodofenphos	COP(=S)(OC)OC1=CC(=C(C=C1Cl)I)Cl	1	3	3	2	Moderate	4.96174	In	21	0	1
1012	Iprobenfos	CC(C)OP(=O)(OC(C)C)SCC1=CC=CC=C1	1	3	3	2	Moderate	4.96174	In	21	0	1
1017	Isazofos	CCOP(=S)(OCC)OC1=NN(C(=N1)Cl)C(C)C	1	3	3	2	Moderate	4.96174	In	21	0	1
1054	Jiajizengxiaolin	COP(=S)(OC)OC1=CC=CC=C1	1	3	3	2	Moderate	4.96174	In	21	0	1
1071	Leptophos	COP(=S)(C1=CC=CC=C1)OC2=CC(=C(C=C2Cl)Br)Cl	1	3	3	2	Moderate	4.96174	In	21	0	1
1125	Menazon	COP(=S)(OC)SCC1=NC(=NC(=N1)N)N	1	3	3	2	Moderate	4.96174	In	21	0	1
1133	Merphos	CCCCSP(SCCCC)SCCCC	1	3	3	2	Moderate	4.96174	In	21	0	1
1153	Methamidophos	COP(=O)(N)SC	1	3	3	2	Moderate	4.96174	In	21	0	1
1160	Methiotepa	CC1CN1P(=S)(N2CC2C)N3CC3C	1	3	3	2	Moderate	4.96174	In	21	0	1
1286	Parathion-ethyl	CCOP(=S)(OCC)OC1=CC=C(C=C1)[N+](=O)[O-]	1	3	3	2	Moderate	4.96174	In	21	0	1
1287	Parathion-methyl	COP(=S)(OC)OC1=CC=C(C=C1)[N+](=O)[O-]	1	3	3	2	Moderate	4.96174	In	21	0	1
1306	Phenkapton	CCOP(=S)(OCC)SCSC1=C(C=CC(=C1)Cl)Cl	1	3	3	2	Moderate	4.96174	In	21	0	1
1313	Phorate	CCOP(=S)(OCC)SCSCC	1	3	3	2	Moderate	4.96174	In	21	0	1
1320	Phosnichlor	COP(=S)(OC)OC1=CC(=C(C=C1)Cl)[N+](=O)[O-]	1	3	3	2	Moderate	4.96174	In	21	0	1
1341	Pirimiphos-ethyl	CCN(CC)C1=NC(=CC(=N1)OP(=S)(OCC)OCC)C	1	3	3	2	Moderate	4.96174	In	21	0	1
1342	Pirimiphos-methyl	CCN(CC)C1=NC(=CC(=N1)OP(=S)(OC)OC)C	1	3	3	2	Moderate	4.96174	In	21	0	1
1356	Profenofos	CCCSP(=O)(OCC)OC1=C(C=C(C=C1)Br)Cl	1	3	3	2	Moderate	4.96174	In	21	0	1
1395	Prothiofos	CCCSP(=S)(OCC)OC1=C(C=C(C=C1)Cl)Cl	1	3	3	2	Moderate	4.96174	In	21	0	1
1405	Pyraclofos	CCCSP(=O)(OCC)OC1=CN(N=C1)C2=CC=C(C=C2)Cl	1	3	3	2	Moderate	4.96174	In	21	0	1
1454	Quinalphos	CCOP(=S)(OCC)OC1=NC2=CC=CC=C2N=C1	1	3	3	2	Moderate	4.96174	In	21	0	1
1461	Quinothion	CCOP(=S)(OCC)OC1=CC(=NC2=CC=CC=C21)C	1	3	3	2	Moderate	4.96174	In	21	0	1
1463	Quintiofos	CCOP(=S)(C1=CC=CC=C1)OC2=CC=CC3=C2N=CC=C3	1	3	3	2	Moderate	4.96174	In	21	0	1
1527	Sulfotep	CCOP(=S)(OCC)OP(=S)(OCC)OCC	1	3	3	2	Moderate	4.96174	In	21	0	1
1542	Tebupirimfos	CCOP(=S)(OC1=CN=C(N=C1)C(C)(C)C)OC(C)C	1	3	3	2	Moderate	4.96174	In	21	0	1
1557	Terbufos	CCOP(=S)(OCC)SCSC(C)(C)C	1	3	3	2	Moderate	4.96174	In	21	0	1
1593	Thionazin	CCOP(=S)(OCC)OC1=NC=CN=C1	1	3	3	2	Moderate	4.96174	In	21	0	1
1609	Tolclofos-methyl	CC1=CC(=C(C(=C1)Cl)OP(=S)(OC)OC)Cl	1	3	3	2	Moderate	4.96174	In	21	0	1
1610	Tolfenpyrad	CC1=CC(=C(C(=C1)Cl)OP(=S)(OC)OC)Cl	1	3	3	2	Moderate	4.96174	In	21	0	1
1636	Triazophos	CCOP(=S)(OCC)OC1=NN(C=N1)C2=CC=CC=C2	1	3	3	2	Moderate	4.96174	In	21	0	1
1640	Tribufos	CCCCSP(=O)(SCCCC)SCCCC	1	3	3	2	Moderate	4.96174	In	21	0	1
1645	Trichloronate	CCOP(=S)(CC)OC1=CC(=C(C=C1Cl)Cl)Cl	1	3	3	2	Moderate	4.96174	In	21	0	1
1655	Trifenofos	CCCSP(=O)(OCC)OC1=C(C=C(C=C1Cl)Cl)Cl	1	3	3	2	Moderate	4.96174	In	21	0	1
432	Coumatetralyl	C1CC(C2=CC=CC=C2C1)C3=C(C4=CC=CC=C4OC3=O)O	1	3	3	2	Moderate	4.95673	In	6	0.0222813	0.972568
19	1,3-dichloropropene	C=CC(Cl)Cl	1	3	3	2	Moderate	4.94582	In	6	0.0322129	0.960341
45	2-allyphenol	C=CCC1=CC=CC=C1O	1	3	3	2	Moderate	4.94582	In	6	0.0322129	0.960341
74	Acrolein	C=CC=O	1	3	3	2	Moderate	4.94582	In	6	0.0322129	0.960341
75	Acrylonitrile	C=CC#N	1	3	3	2	Moderate	4.94582	In	6	0.0322129	0.960341
89	Allyl alcohol	C=CCO	1	3	3	2	Moderate	4.94582	In	6	0.0322129	0.960341
967	Imazalil	C=CCOC(CN1C=CN=C1)C2=C(C=C(C=C2)Cl)Cl	1	3	3	2	Moderate	4.94582	In	6	0.0322129	0.960341
968	Imazalil nitrate	ClC1=CC(Cl)=C(C=C1)C(CN1C=CN=C1)OCC=C	1	3	3	2	Moderate	4.94582	In	6	0.0322129	0.960341
969	Imazalil sulfate	C=CCOC(CN1C=CN=C1)C2=C(C=C(C=C2)Cl)Cl.OS(=O)(=O)O	1	3	3	2	Moderate	4.94582	In	6	0.0322129	0.960341
1338	Piproctanyl	CC(C)CCCC(C)CC[N+]1(CCCCC1)CC=C	1	3	3	2	Moderate	4.94582	In	6	0.0322129	0.960341
1563	Tetrachlorvinphos	COP(=O)(OC)OC(=CCl)C1=CC(=C(C=C1Cl)Cl)Cl	1	3	3	2	Moderate	4.93874	In	6	0.0386627	0.9524
210	Biopermethrin	CC1(C(C1C(=O)OCC2=CC(=CC=C2)OC3=CC=CC=C3)C=C(Cl)Cl)C	1	3	3	2	Moderate	4.9236	In	6	0.0524531	0.935422
396	Cis-permethrin	CC1(C(C1C(=O)OCC2=CC(=CC=C2)OC3=CC=CC=C3)C=C(Cl)Cl)C	1	3	3	2	Moderate	4.9236	In	6	0.0524531	0.935422
1302	Permethrin	CC1(C(C1C(=O)OCC2=CC(=CC=C2)OC3=CC=CC=C3)C=C(Cl)Cl)C	1	3	3	2	Moderate	4.9236	In	6	0.0524531	0.935422
1622	Transpermethrin	CC1(C)C(C=C(Cl)Cl)C1C(=O)OCC1=CC(OC2=CC=CC=C2)=CC=C1	1	3	3	2	Moderate	4.9236	In	6	0.0524531	0.935422
566	Difenacoum	C1C(CC2=CC=CC=C2C1C3=C(C4=CC=CC=C4OC3=O)O)C5=CC=C(C=C5)C6=CC=CC=C6	1	3	3	2	Moderate	4.9157	In	6	0.0596503	0.926561
1016	Isamidofos	CCOP(=O)(NC(C)C)SCC(=O)N(C)C1=CC=CC=C1	1	3	3	2	Moderate	4.9125	In	30	0.0491667	0.96143
1392	Prothidathion	CCOP(=S)(OCC)SCN1C(=O)SC(=N1)OC(C)C	1	3	3	2	Moderate	4.91148	In	27	0.0273619	0.981405
227	Brodifacoum	C1C(CC2=CC=CC=C2C1C3=C(C4=CC=CC=C4OC3=O)O)C5=CC=C(C=C5)C6=CC=C(C=C6)Br	1	3	3	2	Moderate	4.91087	In	6	0.0640518	0.921142
896	Fosthiazate	CCC(C)SP(=O)(N1CCSC1=O)OCC	1	3	3	2	Moderate	4.91086	In	30	0.04729	0.962847
208	Binapacryl	CCC(C)C1=CC(=CC(=C1OC(=O)C=C(C)C)[N+](=O)[O-])[N+](=O)[O-]	1	3	3	2	Moderate	4.90835	In	6	0.0663434	0.918321
1078	Lythidathion	CCOC1=NN(C(=O)S1)CSP(=S)(OC)OC	1	3	3	2	Moderate	4.9061	In	27	0.0214691	0.985351
1337	Piperophos	CCCOP(=S)(OCCC)SCC(=O)N1CCCCC1C	1	3	3	2	Moderate	4.90237	In	27	0.0173941	0.988098
137	Athidathion	CCOP(=S)(OCC)SCN1C(=O)SC(=N1)OC	1	3	3	2	Moderate	4.89399	In	27	0.00821025	0.994347
1157	Methidathion	COC1=NN(C(=O)S1)CSP(=S)(OC)OC	1	3	3	2	Moderate	4.88649	In	27	0	1
144	Azinphos-ethyl	CCOP(=S)(OCC)SCN1C(=O)C2=CC=CC=C2N=N1	1	3	3	2	Moderate	4.87894	In	30	0.0106806	0.99136
988	Imiprothrin	CC(=CC1C(C1(C)C)C(=O)OCN2C(=O)CN(C2=O)CC#C)C	1	3	3	2	Moderate	4.87687	In	6	0.0950221	0.883013
1152	Methacrifos	CC(=COP(=S)(OC)OC)C(=O)OC	1	3	3	2	Moderate	4.87572	In	30	0.00698676	0.994331
145	Azinphos-methyl	COP(=S)(OC)SCN1C(=O)C2=CC=CC=C2N=N1	1	3	3	2	Moderate	4.87463	In	30	0.00573881	0.995339
1515	Spirotetramat	CCOC(=O)OC1=C(C(=O)NC12CCC(CC2)OC)C3=C(C=CC(=C3)C)C	1	3	3	2	Moderate	4.87125	In	6	0.100142	0.876709
1262	Omethoate	CNC(=O)CSP(=O)(OC)OC	1	3	3	2	Moderate	4.86963	In	30	0	1
1216	Morphothion	COP(=S)(OC)SCC(=O)N1CCOCC1	1	3	3	2	Moderate	4.85845	In	27	0.0307023	0.97874
1514	Spiropidion	CCOC(=O)OC1=C(C(=O)N(C12CCN(CC2)OC)C)C3=C(C=C(C=C3C)Cl)C	1	3	3	2	Moderate	4.84816	In	6	0.121171	0.850819
1015	IPSP	CCS(=O)CSP(=S)(OC(C)C)OC(C)C	1	3	3	2	Moderate	4.82985	In	15	0.038944	0.972578
1052	Isoxathion	CCOP(=S)(OCC)OC1=NOC(=C1)C2=CC=CC=C2	1	3	3	2	Moderate	4.82985	In	15	0.038944	0.972578
754	Fenpyrazamine	CC1=CC=CC=C1C2=C(N(N(C2=O)C(C)C)C(=O)SCC=C)N	1	3	3	2	Moderate	4.82444	In	6	0.0951367	0.872825
1396	Prothoate	CCOP(=S)(OCC)SCC(=O)NC(C)C	1	3	3	2	Moderate	4.81533	In	15	0.0226031	0.983899
487	DAEP	CC(=O)NCCSP(=S)(OC)OC	1	3	3	2	Moderate	4.81337	In	15	0.0204033	0.985443
784	Flocoumafen	C1C(CC2=CC=CC=C2C1C3=C(C4=CC=CC=C4OC3=O)O)C5=CC=C(C=C5)OCC6=CC=C(C=C6)C(F)(F)F	1	3	3	2	Moderate	4.81218	In	6	0.153937	0.810479
129	Anilofos	CC(C)N(C1=CC=C(C=C1)Cl)C(=O)CSP(=S)(OC)OC	1	3	3	2	Moderate	4.81214	In	15	0.0190159	0.98642
59	Acephate	CC(=O)NP(=O)(OC)SC	1	3	3	2	Moderate	4.81181	In	33	0.0495526	0.956458
686	Ethoate-methyl	CCNC(=O)CSP(=S)(OC)OC	1	3	3	2	Moderate	4.81021	In	15	0.0168491	0.987949
93	Alpha-cypermethrin	CC1(C(C1C(=O)OC(C#N)C2=CC(=CC=C2)OC3=CC=CC=C3)C=C(Cl)Cl)C	1	3	3	2	Moderate	4.80715	In	6	0.158518	0.804839
201	Beta-cypermethrin	CC1(C(C1C(=O)OC(C#N)C2=CC(=CC=C2)OC3=CC=CC=C3)C=C(Cl)Cl)C	1	3	3	2	Moderate	4.80715	In	6	0.158518	0.804839
474	Cypermethrin	CC1(C(C1C(=O)OC(C#N)C2=CC(=CC=C2)OC3=CC=CC=C3)C=C(Cl)Cl)C	1	3	3	2	Moderate	4.80715	In	6	0.158518	0.804839
1572	Theta-cypermethrin	CC1(C(C1C(=O)OC(C#N)C2=CC(=CC=C2)OC3=CC=CC=C3)C=C(Cl)Cl)C	1	3	3	2	Moderate	4.80715	In	6	0.158518	0.804839
1692	Zeta-cypermethrin	CC1(C(C1C(=O)OC(C#N)C2=CC(=CC=C2)OC3=CC=CC=C3)C=C(Cl)Cl)C	1	3	3	2	Moderate	4.80715	In	6	0.158518	0.804839
1205	Momfluorothrin	CC(=CC1C(C1(C)C)C(=O)OCC2=C(C(=C(C(=C2F)F)COC)F)F)C#N	1	3	3	2	Moderate	4.80443	In	6	0.160999	0.801784
1512	Spirodiclofen	CCC(C)(C)C(=O)OC1=C(C(=O)OC12CCCCC2)C3=C(C=C(C=C3)Cl)Cl	1	3	3	2	Moderate	4.8044	In	6	0.16103	0.801747
444	Cyanthoate	CCOP(=O)(OCC)SCC(=O)NC(C)(C)C#N	1	3	3	2	Moderate	4.79649	In	33	0.0323102	0.971172
590	Dimethoate	CNC(=O)CSP(=S)(OC)OC	1	3	3	2	Moderate	4.79524	In	15	0	1
103	Amidithion	COCCNC(=O)CSP(=S)(OC)OC	1	3	3	2	Moderate	4.78807	In	15	0.00806512	0.994161
750	Fenpirithrin	CC1(C(C1C(=O)OC(C#N)C2=NC(=CC=C2)OC3=CC=CC=C3)C=C(Cl)Cl)C	1	3	3	2	Moderate	4.78458	In	6	0.17908	0.779524
65	Acetophos	CCOC(=O)CSP(=O)(OCC)OCC	1	3	3	2	Moderate	4.7829	In	33	0.017002	0.98462
1175	Methylacetophos	CCOC(=O)CSP(=O)(OC)OC	1	3	3	2	Moderate	4.77678	In	33	0.0101207	0.990788
1025	Isofenphos	CCOP(=S)(NC(C)C)OC1=CC=CC=C1C(=O)OC(C)C	1	3	3	2	Moderate	4.77334	In	33	0.00624099	0.994299
1026	Isofenphos-methyl	CC(C)NP(=S)(OC)OC1=CC=CC=C1C(=O)OC(C)C	1	3	3	2	Moderate	4.77118	In	33	0.00381532	0.996507
1419	Pyrazophos	CCOC(=O)C1=CN2C(=CC(=N2)OP(=S)(OCC)OCC)N=C1C	1	3	3	2	Moderate	4.76852	In	33	0.000811	0.999256
1315	Phosalone	CCOP(=S)(OCC)SCN1C2=C(C=C(C=C2)Cl)OC1=O	1	3	3	2	Moderate	4.7678	In	33	0	1
1021	Isocarbophos	CC(C)OC(=O)C1=CC=CC=C1OP(=S)(N)OC	1	3	3	2	Moderate	4.75477	In	33	0.0146611	0.986531
200	Beta-cyfluthrin	CC1(C(C1C(=O)OC(C#N)C2=CC(=C(C=C2)F)OC3=CC=CC=C3)C=C(Cl)Cl)C	1	3	3	2	Moderate	4.74963	In	6	0.210912	0.740334
464	Cyfluthrin	CC1(C(C1C(=O)OC(C#N)C2=CC(=C(C=C2)F)OC3=CC=CC=C3)C=C(Cl)Cl)C	1	3	3	2	Moderate	4.74963	In	6	0.210912	0.740334
1345	Polyacrylamide	CNC.C=CC(=O)N.C=O	1	3	3	2	Moderate	4.73818	In	6	0.221344	0.72749
931	Halacrinate	C=CC(=O)OC1=C(C=C(C2=C1N=CC=C2)Cl)Br	1	3	3	2	Moderate	4.71221	In	6	0.244994	0.698373
232	Bromadiolone	C1=CC=C(C=C1)C(CC(C2=CC=C(C=C2)C3=CC=C(C=C3)Br)O)C4=C(C5=CC=CC=C5OC4=O)O	1	3	3	2	Moderate	4.70494	In	34	0.245748	0.662014
1319	Phosmet	COP(=S)(OC)SCN1C(=O)C2=CC=CC=C2C1=O	1	3	3	2	Moderate	4.69967	In	33	0.0766991	0.929536
175	Bensulide	CC(C)OP(=S)(OC(C)C)SCCNS(=O)(=O)C1=CC=CC=C1	1	3	3	2	Moderate	4.69796	In	37	0	1
502	Demephion-O	COP(=S)(OC)OCCSC	1	3	3	2	Moderate	4.69796	In	37	0	1
503	Demeton	CCOP(=S)(OCC)OCCSCC	1	3	3	2	Moderate	4.69796	In	37	0	1
504	Demeton-O-methyl	CCSCCOP(=S)(OC)OC	1	3	3	2	Moderate	4.69796	In	37	0	1
505	Demeton-O-methyl sulfone	CCS(=O)(=O)CCOP(=S)(OC)OC	1	3	3	2	Moderate	4.69796	In	37	0	1
632	Disulfoton	CCOP(=S)(OCC)SCCSCC	1	3	3	2	Moderate	4.69796	In	37	0	1
633	Disulfoton sulfoxide	CCOP(=S)(OCC)SCCS(=O)CC	1	3	3	2	Moderate	4.69796	In	37	0	1
1042	Isothioate	CC(C)SCCSP(=S)(OC)OC	1	3	3	2	Moderate	4.69796	In	37	0	1
1592	Thiometon	CCSCCSP(=S)(OC)OC	1	3	3	2	Moderate	4.69796	In	37	0	1
142	Azamethiphos	COP(=O)(OC)SCN1C2=NC=C(C=C2OC1=O)Cl	1	3	3	2	Moderate	4.6966	In	33	0.0801561	0.926359
491	Dazomet	CN1CN(C(=S)SC1)C	1	3	2	1	Bad/Unreliable	4.68287	In	10	0.41213	0.559575
101	Amibuzin	CC(C)(C)C1=NN=C(N(C1=O)C)N(C)C	1	3	2	1	Bad/Unreliable	4.66957	In	10	0.399517	0.567221
1686	Warfarin	CC(=O)CC(C1=CC=CC=C1)C2=C(C3=CC=CC=C3OC2=O)O	1	3	3	2	Moderate	4.65798	In	34	0.249867	0.611509
513	Dialifos	CCOP(=S)(OCC)SC(CCl)N1C(=O)C2=CC=CC=C2C1=O	1	3	3	2	Moderate	4.64891	In	33	0.133849	0.877031
433	Coumethoxystrobin	CC1=C(C(=O)OC2=C1C=CC(=C2)OCC3=CC=CC=C3C(=COC)C(=O)OC)C	1	3	2	1	Bad/Unreliable	4.647	In	10	0.378112	0.580686
775	Ferimzone	CC1=CC=CC=C1C(=NNC2=NC(=CC(=N2)C)C)C	1	3	2	1	Bad/Unreliable	4.64403	In	10	0.375299	0.582503
1161	Methiozolin	CC1=C(SC=C1)C2=NOC(C2)(C)COCC3=C(C=CC=C3F)F	1	3	2	1	Bad/Unreliable	4.63198	In	10	0.363865	0.590007
1596	Thioquinox	C1=CC=C2C(=C1)N=C3C(=N2)SC(=S)S3	1	3	2	1	Bad/Unreliable	4.62984	In	10	0.361833	0.591361
983	Imibenconazole	C1=CC(=CC=C1CSC(=NC2=C(C=C(C=C2)Cl)Cl)CN3C=NC=N3)Cl	1	3	2	1	Bad/Unreliable	4.6216	In	10	0.354018	0.596627
1182	Metiram	SC(=S)NCCNC([S-])=S	1	3	2	1	Bad/Unreliable	4.62132	In	10	0.353751	0.596808
1621	Transfluthrin	CC1(C(C1C(=O)OCC2=C(C(=CC(=C2F)F)F)F)C=C(Cl)Cl)C	1	3	3	2	Moderate	4.61518	In	34	0.258452	0.565467
1290	Pefurazoate	CCC(C(=O)OCCCC=C)N(CC1=CC=CO1)C(=O)N2C=CN=C2	1	3	3	2	Moderate	4.60855	In	34	0.260165	0.558341
998	Iodobonil	C=CCOC(=O)OC1=C(C=C(C=C1I)C#N)I	1	3	3	2	Moderate	4.60658	In	34	0.260694	0.556221
1127	Meperfluthrin	CC1(C(C1C(=O)OCC2=C(C(=C(C(=C2F)F)COC)F)F)C=C(Cl)Cl)C	1	3	3	2	Moderate	4.60431	In	34	0.261314	0.55378
1468	Renofluthrin	CC1(C(C1C(=O)OCC2=C(C(=C(C(=C2F)F)COC)F)F)C=C(Cl)Cl)C	1	3	3	2	Moderate	4.60431	In	34	0.261314	0.55378
1318	Phosfolan	CCOP(=O)(N=C1SCCS1)OCC	1	3	3	2	Moderate	4.59986	In	10	0.333398	0.610982
429	Coumachlor	CC(=O)CC(C1=CC=C(C=C1)Cl)C2=C(C3=CC=CC=C3OC2=O)O	1	3	3	2	Moderate	4.59985	In	34	0.262565	0.54898
1129	Mephosfolan	CCOP(=O)(N=C1SCC(S1)C)OCC	1	3	3	2	Moderate	4.59886	In	10	0.332451	0.611658
256	Buprofezin	CC(C)N1C(=NC(C)(C)C)SCN(C1=O)C2=CC=CC=C2	1	3	3	2	Moderate	4.59882	In	10	0.332413	0.611685
897	Fosthietan	CCOP(=O)(N=C1SCS1)OCC	1	3	3	2	Moderate	4.59187	In	10	0.325823	0.61643
1574	Thiacloprid	C1CSC(=NC#N)N1CC2=CN=C(C=C2)Cl	1	3	3	2	Moderate	4.58877	In	10	0.322875	0.618577
635	Ditalimfos	CCOP(=S)(N1C(=O)C2=CC=CC=C2C1=O)OCC	1	3	3	2	Moderate	4.58305	In	33	0.207997	0.80891
63	Acethion	CCOC(=O)CSP(=S)(OCC)OCC	1	3	3	2	Moderate	4.57662	In	37	0.132748	0.911016
60	Acequinocyl	CCCCCCCCCCCCC1=C(C(=O)C2=CC=CC=C2C1=O)OC(=O)C	1	3	3	2	Moderate	4.57308	In	34	0.270955	0.52019
516	Diammonium ethylenebis (dithiocarbamate)	C(CNC(=S)[S-])NC(=S)[S-]	1	3	3	2	Moderate	4.56949	In	10	0.30459	0.632234
1086	Mancopper	[S-]C(=S)NCCNC([S-])=S	1	3	3	2	Moderate	4.56949	In	10	0.30459	0.632234
1089	Maneb	C(CNC(=S)[S-])NC(=S)[S-]	1	3	3	2	Moderate	4.56949	In	10	0.30459	0.632234
1224	Nabam	C(CNC(=S)[S-])NC(=S)[S-]	1	3	3	2	Moderate	4.56949	In	10	0.30459	0.632234
1693	Zineb	C(CNC(=S)[S-])NC(=S)[S-]	1	3	3	2	Moderate	4.56949	In	10	0.30459	0.632234
1031	Isomethiozin	CC(C)C=NN1C(=O)C(=NN=C1SC)C(C)(C)C	1	3	3	2	Moderate	4.56776	In	10	0.302954	0.633485
1380	Propineb	CC(CNC(=S)[S-])NC(=S)[S-]	1	3	3	2	Moderate	4.56723	In	10	0.30245	0.633872
501	Demephion	COP(=O)(OC)SCCSC	1	3	3	2	Moderate	4.56607	In	12	0	1
506	Demeton-S-methyl	CCSCCSP(=O)(OC)OC	1	3	3	2	Moderate	4.56607	In	12	0	1
507	Demeton-S-methyl sulfone	CCS(=O)(=O)CCSP(=O)(OC)OC	1	3	3	2	Moderate	4.56607	In	12	0	1
1281	Oxydemeton-methyl	CCS(=O)CCSP(=O)(OC)OC	1	3	3	2	Moderate	4.56607	In	12	0	1
1282	Oxydeprofos	CCS(=O)CC(C)SP(=O)(OC)OC	1	3	3	2	Moderate	4.56607	In	12	0	1
1681	Vamidothion	CC(C(=O)NC)SCCSP(=O)(OC)OC	1	3	3	2	Moderate	4.56473	In	12	0.00141373	0.999091
1435	Pyrifenox	CON=C(CC1=CN=CC=C1)C2=C(C=C(C=C2)Cl)Cl	1	3	3	2	Moderate	4.56469	In	10	0.300042	0.635725
1162	Methiuron	CC1=CC(=CC=C1)NC(=S)N(C)C	1	3	3	2	Moderate	4.56207	In	10	0.297555	0.63765
727	Fenfluthrin	CC1(C(C1C(=O)OCC2=C(C(=C(C(=C2F)F)F)F)F)C=C(Cl)Cl)C	1	3	3	2	Moderate	4.55765	In	34	0.276442	0.503598
890	Formothion	CN(C=O)C(=O)CSP(=S)(OC)OC	1	3	3	2	Moderate	4.55753	In	37	0.153632	0.897017
1309	Phenthoate	CCOC(=O)C(C1=CC=CC=C1)SP(=S)(OC)OC	1	3	3	2	Moderate	4.55501	In	37	0.156385	0.895172
430	Coumafuryl	CC(=O)CC(C1=CC=CO1)C2=C(C3=CC=CC=C3OC2=O)O	1	3	3	2	Moderate	4.55272	In	34	0.278292	0.498291
1239	Nithiazine	C1CNC(=C[N+](=O)[O-])SC1	1	3	3	2	Moderate	4.54037	In	10	0.276969	0.654046
62	Acetamiprid	CC(=NC#N)N(C)CC1=CN=C(C=C1)Cl	1	3	3	2	Moderate	4.53885	In	10	0.27553	0.655224
194	Benzovindiflupyr	CN1C=C(C(=N1)C(F)F)C(=O)NC2=CC=CC3=C2C4CCC3C4=C(Cl)Cl	1	3	3	2	Moderate	4.53187	In	10	0.268911	0.660696
291	Carbamorph	CN(C)C(=S)SCN1CCOCC1	1	3	2	1	Bad/Unreliable	4.52637	In	10	0.400526	0.519138
512	Diafenthiuron	CC(C)C1=CC(=CC(=C1NC(=S)NC(C)(C)C)C(C)C)OC2=CC=CC=C2	1	3	3	2	Moderate	4.5251	In	10	0.262492	0.666091
573	Difethialone	C1C(CC2=CC=CC=C2C1C3=C(SC4=CC=CC=C4C3=O)O)C5=CC=C(C=C5)C6=CC=C(C=C6)Br	1	3	3	2	Moderate	4.51789	In	10	0.255649	0.67194
1511	Spirobudifen	CCCCOC(=O)OC1=C(C(=O)OC12CCCCC2)C3=C(C=C(C=C3)Cl)Cl	1	3	3	2	Moderate	4.51683	In	38	0.27585	0
711	Fenamidone	CC1(C(=O)N(C(=N1)SC)NC2=CC=CC=C2)C3=CC=CC=C3	1	3	3	2	Moderate	4.50278	In	10	0.241312	0.684534
683	Ethiozin	CCSC1=NN=C(C(=O)N1N)C(C)(C)C	1	3	3	2	Moderate	4.4977	In	10	0.2365	0.688868
203	Bethoxazin	C1CS(=O)C(=NO1)C2=CC3=CC=CC=C3S2	1	3	3	2	Moderate	4.49692	In	10	0.23576	0.689539
1459	Quinofumelin	CC1(C(C2=CC=CC=C2C(=N1)C3=CC4=CC=CC=C4N=C3)(F)F)C	1	3	3	2	Moderate	4.49386	In	10	0.232854	0.692188
141	Azafenidin	C#CCOC1=C(C=C(C(=C1)N2C(=O)N3CCCCC3=N2)Cl)Cl	1	3	3	2	Moderate	4.49202	In	10	0.231113	0.693784
673	Ethalfluralin	CCN(CC(=C)C)C1=C(C=C(C=C1[N+](=O)[O-])C(F)(F)F)[N+](=O)[O-]	1	3	3	2	Moderate	4.4861	In	10	0.225493	0.698989
1517	Strobane	ClC1[C@@]2(Cl)C(C)(C)C(=C)[C@@]1(Cl)C(Cl)(Cl)C2(Cl)Cl	1	3	3	2	Moderate	4.4834	In	10	0.222936	0.701384
1141	Metam	CNC(=S)S	1	3	3	2	Moderate	4.47797	In	10	0.217788	0.706254
1193	Metribuzin	CC(C)(C)C1=NN=C(N(C1=O)N)SC	1	3	3	2	Moderate	4.47504	In	10	0.215004	0.708915
774	Ferbam	CN(C)C([S-])=S	1	3	3	2	Moderate	4.46799	In	10	0.208319	0.71539
1403	Pymetrozine	CC1=NNC(=O)N(C1)N=CC2=CN=CC=C2	1	3	3	2	Moderate	4.45548	In	10	0.196455	0.727177
452	Cyclohexanone	C1CCC(=O)CC1	1	3	3	2	Moderate	4.44852	In	10	0.189854	0.733904
1238	Nitenpyram	CCN(CC1=CN=C(C=C1)Cl)C(=C[N+](=O)[O-])NC	1	3	3	2	Moderate	4.44501	In	10	0.186521	0.737349
3	(R)-flufiprole	CC(=C)CNC1=C(C(=NN1C2=C(C=C(C=C2Cl)C(F)(F)F)Cl)C#N)S(=O)C(F)(F)F	1	3	3	2	Moderate	4.43789	In	10	0.179765	0.744432
823	Flufiprole	CC(=C)CNC1=C(C(=NN1C2=C(C=C(C=C2Cl)C(F)(F)F)Cl)C#N)S(=O)C(F)(F)F	1	3	3	2	Moderate	4.43789	In	10	0.179765	0.744432
1300	Pentoxazone	CC(=C1C(=O)N(C(=O)O1)C2=CC(=C(C=C2F)Cl)OC3CCCC3)C	1	3	2	1	Bad/Unreliable	4.42972	In	38	0.257514	0
1389	Proquinazid	CCCN1C(=O)C2=C(C=CC(=C2)I)N=C1OCCC	1	3	3	2	Moderate	4.42761	In	10	0.170017	0.754892
929	Guazatine	C(CCCCN=C(N)N)CCCNCCCCCCCCN=C(N)N	1	3	3	2	Moderate	4.4232	In	10	0.165837	0.759469
987	Iminoctadine triacetate	NC(N)=NCCCCCCCCNCCCCCCCCN=C(N)N	1	3	3	2	Moderate	4.4232	In	10	0.165837	0.759469
1507	Sodium tetrathiocarbonate	C(=S)([S-])S[S-]	1	3	3	2	Moderate	4.42207	In	10	0.164761	0.760656
865	Fluridone	CN1C=C(C(=O)C(=C1)C2=CC(=CC=C2)C(F)(F)F)C3=CC=CC=C3	1	3	3	2	Moderate	4.42071	In	10	0.163469	0.762087
29	1-octyl-2-pyrrolidone	CCCCCCCCN1CCCC1=O	1	3	3	2	Moderate	4.40951	In	10	0.152852	0.774047
639	Dixanthogen	CCOC(=S)SSC(=S)OCC	1	3	2	1	Bad/Unreliable	4.4075	In	10	0.444923	0.468685
1332	Pinoxaden	CCC1=CC(=CC(=C1C2=C(N3CCOCCN3C2=O)OC(=O)C(C)(C)C)CC)C	1	3	3	2	Moderate	4.40425	In	10	0.147855	0.779808
219	Bisthiosemi	C(NNC(=S)N)NNC(=S)N	1	3	3	2	Moderate	4.39382	In	10	0.137964	0.791466
1174	Methyl nonyl ketone	CCCCCCCCCC(=O)C	1	3	3	2	Moderate	4.39354	In	10	0.137702	0.79178
1590	Thiofanox	CC(C)(C)C(=NOC(=O)NC)CSC	1	3	3	2	Moderate	4.3927	In	10	0.136904	0.792736
1427	Pyributicarb	CC(C)(C)C1=CC(=CC=C1)OC(=S)N(C)C2=NC(=CC=C2)OC	1	3	3	2	Moderate	4.39085	In	10	0.135147	0.794851
1143	Metamitron	CC1=NN=C(C(=O)N1N)C2=CC=CC=C2	1	3	3	2	Moderate	4.38496	In	10	0.129567	0.801641
1661	Triflumizole	CCCOCC(=NC1=C(C=C(C=C1)Cl)C(F)(F)F)N2C=CN=C2	1	3	3	2	Moderate	4.38165	In	10	0.12642	0.805521
1449	Pyroquilon	C1CC(=O)N2CCC3=CC=CC1=C32	1	3	3	2	Moderate	4.37912	In	10	0.124025	0.8085
848	Fluoxastrobin	CON=C(C1=CC=CC=C1OC2=C(C(=NC=N2)OC3=CC=CC=C3Cl)F)C4=NOCCO4	1	3	3	2	Moderate	4.37609	In	10	0.121149	0.812106
95	Alpha-naphthylthiourea	C1=CC=C2C(=C1)C=CC=C2NC(=S)N	1	3	3	2	Moderate	4.37469	In	10	0.119822	0.813781
1374	Propaquizafop	CC(C(=O)OCCON=C(C)C)OC1=CC=C(C=C1)OC2=CN=C3C=C(C=CC3=N2)Cl	1	3	3	2	Moderate	4.37443	In	10	0.119573	0.814096
1246	N-methyl-2-pyrrolidone	CN1CCCC1=O	1	3	3	2	Moderate	4.37415	In	10	0.11931	0.81443
1172	Methyl isobutyl ketone	CC(C)CC(=O)C	1	3	3	2	Moderate	4.37215	In	10	0.117416	0.816836
986	Imidaclothiz	C1CN(C(=N1)N[N+](=O)[O-])CC2=CN=C(S2)Cl	1	3	3	2	Moderate	4.37196	In	10	0.117235	0.817066
597	Dimexano	COC(=S)SSC(=S)OC	1	3	2	1	Bad/Unreliable	4.37144	In	10	0.414349	0.483487
985	Imidacloprid	C1CN(C(=N1)N[N+](=O)[O-])CC2=CN=C(C=C2)Cl	1	3	3	2	Moderate	4.37014	In	10	0.115503	0.81928
451	Cycloate	CCN(C1CCCCC1)C(=O)SCC	1	3	3	2	Moderate	4.36892	In	10	0.114348	0.820764
1204	Molinate	CCSC(=O)N1CCCCCC1	1	3	3	2	Moderate	4.36792	In	10	0.113401	0.821984
1034	Isopolinate	CC(C)SC(=O)N1CCCCCC1	1	3	3	2	Moderate	4.36692	In	10	0.112454	0.823208
1222	N,N-dimethyl capramide	CCCCCCCCCC(=O)N(C)C	1	3	3	2	Moderate	4.3616	In	10	0.107401	0.8298
267	Butocarboxim	CC(C(=NOC(=O)NC)C)SC	1	3	3	2	Moderate	4.35968	In	10	0.105581	0.8322
1683	Vernolate	CCCN(CCC)C(=O)SCCC	1	3	3	2	Moderate	4.3584	In	10	0.104368	0.833808
1289	Pebulate	CCCCN(CC)C(=O)SCCC	1	3	3	2	Moderate	4.3553	In	10	0.101432	0.837724
1267	Oxabetrinil	C1COC(O1)CON=C(C#N)C2=CC=CC=C2	1	3	3	2	Moderate	4.35163	In	10	0.0979465	0.842422
663	EPTC	CCCN(CCC)C(=O)SCC	1	3	3	2	Moderate	4.35067	In	10	0.0970386	0.843654
1364	Prohydrojasmon	CCCCCC1C(CCC1=O)CC(=O)OCCC	1	3	3	2	Moderate	4.34877	In	10	0.0952342	0.846114
275	Butylate	CCSC(=O)N(CC(C)C)CC(C)C	1	3	3	2	Moderate	4.34816	In	10	0.0946524	0.84691
582	Dimepiperate	CC(C)(C1=CC=CC=C1)SC(=O)N2CCCCC2	1	3	3	2	Moderate	4.34562	In	10	0.0922484	0.850216
384	Chlorthiamid	C1=CC(=C(C(=C1)Cl)C(=S)N)Cl	1	3	3	2	Moderate	4.34444	In	10	0.0911299	0.851762
643	Dodine	CCCCCCCCCCCCN=C(N)N	1	3	3	2	Moderate	4.34257	In	10	0.0893589	0.854223
1214	Morfamquat	CC1COCC(N1C(=O)C[N+]2=CC=C(C=C2)C3=CC=[N+](C=C3)CC(=O)N4C(COCC4C)C)C	1	3	3	2	Moderate	4.34051	In	10	0.087399	0.856963
1215	Morfamquat dichloride	CC1COCC(N1C(=O)C[N+]2=CC=C(C=C2)C3=CC=[N+](C=C3)CC(=O)N4C(COCC4C)C)C	1	3	3	2	Moderate	4.34051	In	10	0.087399	0.856963
1181	Methylmercury dicyanamide	C[Hg]N=C(N)NC#N	1	3	3	2	Moderate	4.34021	In	10	0.0871151	0.857362
320	Chloranocryl	CC(=C)C(=O)NC1=CC(=C(C=C1)Cl)Cl	1	3	3	2	Moderate	4.338	In	10	0.0850173	0.860317
1390	Prosulfocarb	CCCN(CCC)C(=O)SCC1=CC=CC=C1	1	3	3	2	Moderate	4.33723	In	10	0.0842944	0.86134
1543	Tebutam	CC(C)N(CC1=CC=CC=C1)C(=O)C(C)(C)C	1	3	3	2	Moderate	4.33676	In	10	0.0838399	0.861984
1604	Tiocarbazil	CCC(C)N(C(C)CC)C(=O)SCC1=CC=CC=C1	1	3	3	2	Moderate	4.33524	In	10	0.0824006	0.864031
681	Ethiolate	CCN(CC)C(=O)SCC	1	3	3	2	Moderate	4.33522	In	10	0.0823805	0.86406
1425	Pyribencarb	CC1=NC(=CC=C1)CON=C(C)C2=CC(=C(C=C2)Cl)CNC(=O)OC	1	3	3	2	Moderate	4.32802	In	10	0.0755569	0.8739
667	Esprocarb	CCN(C(C)C(C)C)C(=O)SCC1=CC=CC=C1	1	3	3	2	Moderate	4.32725	In	10	0.0748254	0.874968
613	Dinotefuran	CN=C(NCC1CCOC1)N[N+](=O)[O-]	1	3	3	2	Moderate	4.32699	In	10	0.0745781	0.87533
1247	N-methylneodecanamide	CCC(C)(CCC(C)C)C(=O)NC	1	3	3	2	Moderate	4.3245	In	10	0.0722108	0.878808
472	Cyometrinil	C1=CC=C(C=C1)C(=NOCC#N)C#N	1	3	3	2	Moderate	4.32058	In	10	0.0684989	0.884317
565	Diethyltoluamide	CCN(CC)C(=O)C1=CC(=CC=C1)C	1	3	3	2	Moderate	4.30175	In	10	0.0506404	0.911817
1263	Orbencarb	CCN(CC)C(=O)SCC1=CC=CC=C1Cl	1	3	3	2	Moderate	4.29825	In	10	0.0473147	0.917129
621	Diphenamid	CN(C)C(=O)C(C1=CC=CC=C1)C2=CC=CC=C2	1	3	3	2	Moderate	4.29325	In	10	0.0425727	0.92481
1398	Proximpham	CC(=NOC(=O)NC1=CC=CC=C1)C	1	3	3	2	Moderate	4.29253	In	10	0.0418954	0.925917
189	Benzipram	CC1=CC(=CC(=C1)C(=O)N(CC2=CC=CC=C2)C(C)C)C	1	3	3	2	Moderate	4.29055	In	10	0.0400173	0.929003
1393	Prothiocarb	CCSC(=O)NCCCN(C)C	1	3	3	2	Moderate	4.2888	In	10	0.0383519	0.931756
1032	Isonoruron	CN(C)C(=O)NC1CCC2C1C3CCC2C3	1	3	3	2	Moderate	4.28767	In	10	0.037279	0.933538
1394	Prothioconazole	C1CC1(C(CC2=CC=CC=C2Cl)(CN3C(=S)N=CN3)O)Cl	1	3	3	2	Moderate	4.28758	In	10	0.18868	0.66947
1252	Noruron	CN(C)C(=O)NC1CC2CC1C3C2CCC3	1	3	3	2	Moderate	4.28714	In	10	0.0367765	0.934375
508	Denatonium benzoate	CC[N+](CC)(CC(=O)NC1=C(C)C=CC=C1C)CC1=CC=CC=C1	1	3	3	2	Moderate	4.28711	In	10	0.0367516	0.934416
418	Clothianidin	CN=C(NCC1=CN=C(S1)Cl)N[N+](=O)[O-]	1	3	3	2	Moderate	4.28611	In	10	0.0358014	0.936003
1370	Propamidine	C1=CC(=CC=C1C(=N)N)OCCCOC2=CC=C(C=C2)C(=N)N	1	3	3	2	Moderate	4.2849	In	10	0.0346503	0.937934
483	Cypromid	C1CC1C(=O)NC2=CC(=C(C=C2)Cl)Cl	1	3	3	2	Moderate	4.27967	In	10	0.0296907	0.94634
68	Acibenzolar-S-methyl	CSC(=O)C1=C2C(=CC=C1)N=NS2	1	3	3	2	Moderate	4.27698	In	10	0.0271382	0.950726
1298	Pentanochlor	CCCC(C)C(=O)NC1=CC(=C(C=C1)C)Cl	1	3	3	2	Moderate	4.27303	In	10	0.023396	0.95723
526	Dichlobentiazox	C1=CC=C2C(=C1)C(=NS2(=O)=O)OCC3=C(C(=NS3)Cl)Cl	1	3	3	2	Moderate	4.2728	In	10	0.0231761	0.957615
311	Chinomethionat	CC1=CC2=C(C=C1)N=C3C(=N2)SC(=O)S3	1	3	3	2	Moderate	4.27114	In	10	0.0216	0.960383
1206	Monalide	CCCC(C)(C)C(=O)NC1=CC=C(C=C1)Cl	1	3	3	2	Moderate	4.271	In	10	0.0214653	0.960621
460	Cycluron	CN(C)C(=O)NC1CCCCCCC1	1	3	3	2	Moderate	4.27056	In	10	0.0210491	0.961355
454	Cycloprate	CCCCCCCCCCCCCCCCOC(=O)C1CC1	1	3	3	2	Moderate	4.27021	In	10	0.020716	0.961943
1103	MCPA-thioethyl	CCSC(=O)COC1=C(C=C(C=C1)Cl)C	1	3	3	2	Moderate	4.26907	In	10	0.0196388	0.96385
1147	Metazoxolon	CC1=NOC(=O)C1=NNC2=CC(=CC=C2)Cl	1	3	3	2	Moderate	4.26894	In	10	0.0195182	0.964064
1169	Methoxyphenone	CC1=CC=CC(=C1)C(=O)C2=CC(=C(C=C2)OC)C	1	3	3	2	Moderate	4.26811	In	10	0.0187309	0.965464
831	Flumipropyn	CC(C#C)OC1=C(C=C(C(=C1)N2C(=O)C3=C(C2=O)CCCC3)F)Cl	1	3	3	2	Moderate	4.26588	In	10	0.016614	0.969247
1456	Quinconazole	C1=CC=C2C(=C1)C(=O)N(C(=N2)N3C=NC=N3)C4=C(C=C(C=C4)Cl)Cl	1	3	3	2	Moderate	4.26464	In	10	0.0154326	0.971371
1079	Malathion	CCOC(=O)CC(C(=O)OCC)SP(=S)(OC)OC	1	3	3	2	Moderate	4.26297	In	26	0	1
1230	Napropamide	CCN(CC)C(=O)C(C)OC1=CC=CC2=CC=CC=C21	1	3	3	2	Moderate	4.26152	In	10	0.0124742	0.976732
1231	Napropamide-M	CCN(CC)C(=O)C(C)OC1=CC=CC2=CC=CC=C21	1	3	3	2	Moderate	4.26152	In	10	0.0124742	0.976732
746	Fenoxasulfone	CCOC1=C(C=C(C(=C1)Cl)CS(=O)(=O)C2=NOC(C2)(C)C)Cl	1	3	3	2	Moderate	4.25978	In	10	0.0108227	0.97975
312	Chlobenthiazone	CN1C2=C(C=CC=C2Cl)SC1=O	1	3	3	2	Moderate	4.25959	In	10	0.0106432	0.980079
236	Bromobutide	CC(C)(C)C(C(=O)NC(C)(C)C1=CC=CC=C1)Br	1	3	3	2	Moderate	4.25889	In	10	0.00998151	0.981294
732	Fenmezoditiaz	C[n+]1c2n([C@H](CS2)c2cnc(s2)Cl)c(=O)c(c1[O-])c1ccccc1	1	3	3	2	Moderate	4.2586	In	10	0.16563	0.693855
395	Cisanilide	CC1CCC(N1C(=O)NC2=CC=CC=C2)C	1	3	3	2	Moderate	4.25583	In	10	0.00708283	0.986654
644	Drazoxolon	CC1=NOC(=O)C1=NNC2=CC=CC=C2Cl	1	3	3	2	Moderate	4.25496	In	10	0.00625974	0.988187
15	1,2-benzisothiazolin-3-one	C1=CC=C2C(=C1)C(=O)NS2	1	3	3	2	Moderate	4.25459	In	10	0.00590867	0.988842
410	Clomazone	CC1(CON(C1=O)CC2=CC=CC=C2Cl)C	1	3	3	2	Moderate	4.25133	In	10	0.0028103	0.994662
4	(R)-flutriafol	C1=CC=C(C(=C1)C(CN2C=NC=N2)(C3=CC=C(C=C3)F)O)F	1	3	3	2	Moderate	4.24837	In	10	0	1
5	(R)-hexaconazole	CCCCC(CN1C=NC=N1)(C2=C(C=C(C=C2)Cl)Cl)O	1	3	3	2	Moderate	4.24837	In	10	0	1
6	(S)-flutriafol	C1=CC=C(C(=C1)C(CN2C=NC=N2)(C3=CC=C(C=C3)F)O)F	1	3	3	2	Moderate	4.24837	In	10	0	1
9	1,1,1,2-tetrachloroethane	C(C(Cl)(Cl)Cl)Cl	1	3	3	2	Moderate	4.24837	In	10	0	1
10	1,1,1-acetonitrile	CC#N	1	3	3	2	Moderate	4.24837	In	10	0	1
11	1,1,1-trichloroethane	CC(Cl)(Cl)Cl	1	3	3	2	Moderate	4.24837	In	10	0	1
12	1,1-bis(4-chlorophenyl)-2-ethoxyethanol	CCOCC(C1=CC=C(C=C1)Cl)(C2=CC=C(C=C2)Cl)O	1	3	3	2	Moderate	4.24837	In	10	0	1
13	1,1-dichloroethane	CC(Cl)Cl	1	3	3	2	Moderate	4.24837	In	10	0	1
14	1,2,3-trichloropropane	C(C(CCl)Cl)Cl	1	3	3	2	Moderate	4.24837	In	10	0	1
16	1,2-dibromoethane	C(CBr)Br	1	3	3	2	Moderate	4.24837	In	10	0	1
17	1,2-dichloropropane	CC(CCl)Cl	1	3	3	2	Moderate	4.24837	In	10	0	1
20	1,3-dinitrobenzene	C1=CC(=CC(=C1)[N+](=O)[O-])[N+](=O)[O-]	1	3	3	2	Moderate	4.24837	In	10	0	1
21	1,4-dimethylnaphthalene	CC1=CC=C(C2=CC=CC=C12)C	1	3	3	2	Moderate	4.24837	In	10	0	1
22	1,4-dioxane	C1COCCO1	1	3	3	2	Moderate	4.24837	In	10	0	1
23	10,10'-oxybisphenoxarsine	C1=CC=C2C(=C1)OC3=CC=CC=C3[As]2O[As]4C5=CC=CC=C5OC6=CC=CC=C64	1	3	3	2	Moderate	4.24837	In	10	0	1
24	1-decanol	CCCCCCCCCCO	1	3	3	2	Moderate	4.24837	In	10	0	1
26	1-methylnaphthalene	CC1=CC=CC2=CC=CC=C12	1	3	3	2	Moderate	4.24837	In	10	0	1
30	2-(octylthio)ethanol	CCCCCCCCSCCO	1	3	3	2	Moderate	4.24837	In	10	0	1
31	2-(thiocyanomethylthio)benzothiazole	C1=CC=C2C(=C1)N=C(S2)SCSC#N	1	3	3	2	Moderate	4.24837	In	10	0	1
35	2,4,5-trichlorophenol	C1=C(C(=CC(=C1Cl)Cl)Cl)O	1	3	3	2	Moderate	4.24837	In	10	0	1
40	2,4-DEP	C1=CC(=C(C=C1Cl)Cl)OCCOP(OCCOC2=C(C=C(C=C2)Cl)Cl)OCCOC3=C(C=C(C=C3)Cl)Cl	1	3	3	2	Moderate	4.24837	In	10	0	1
41	2,4-dimethylphenol	CC1=CC(=C(C=C1)O)C	1	3	3	2	Moderate	4.24837	In	10	0	1
46	2-aminobutane	CCC(C)N	1	3	3	2	Moderate	4.24837	In	10	0	1
47	2-butoxyethanol	CCCCOCCO	1	3	3	2	Moderate	4.24837	In	10	0	1
48	2-hydrazinoethanol	C(CO)NN	1	3	3	2	Moderate	4.24837	In	10	0	1
49	2-methoxyethanol	COCCO	1	3	3	2	Moderate	4.24837	In	10	0	1
51	2-methoxyethylmercury chloride	COC[CH2]	1	3	3	2	Moderate	4.24837	In	10	0	1
52	2-methyl naphthalene	CC1=CC2=CC=CC=C2C=C1	1	3	3	2	Moderate	4.24837	In	10	0	1
54	2-phenylphenol	C1=CC=C(C=C1)C2=CC=CC=C2O	1	3	3	2	Moderate	4.24837	In	10	0	1
55	4,4-methylenedianiline	C1=CC(=CC=C1CC2=CC=C(C=C2)N)N	1	3	3	2	Moderate	4.24837	In	10	0	1
56	4-aminopyridine	C1=CN=CC=C1N	1	3	3	2	Moderate	4.24837	In	10	0	1
57	8-hydroxyquinoline	C1=CC2=C(C(=C1)O)N=CC=C2	1	3	3	2	Moderate	4.24837	In	10	0	1
72	Aclonifen	C1=CC=C(C=C1)OC2=C(C(=C(C=C2)[N+](=O)[O-])N)Cl	1	3	3	2	Moderate	4.24837	In	10	0	1
76	Acynonapyr	CCCOC1=C(C=CC(=C1)C(F)(F)F)OC2CC3CCCC(C2)N3OC4=NC=C(C=C4)C(F)(F)F	1	3	3	2	Moderate	4.24837	In	10	0	1
82	Aldimorph	CCCCCCCCCCCCN1CC(OC(C1)C)C	1	3	3	2	Moderate	4.24837	In	10	0	1
92	Alpha-chlorohydrin	C(C(CCl)O)O	1	3	3	2	Moderate	4.24837	In	10	0	1
96	Aluminium ammonium sulphate	[O-]S([O-])(=O)=O	1	3	3	2	Moderate	4.24837	In	10	0	1
97	Aluminium phosphide	[Al]#P	1	3	3	2	Moderate	4.24837	In	10	0	1
98	Ametoctradin	CCCCCCCCC1=C(N2C(=NC=N2)N=C1CC)N	1	3	3	2	Moderate	4.24837	In	10	0	1
100	Ametryn	CCNC1=NC(=NC(=N1)SC)NC(C)C	1	3	3	2	Moderate	4.24837	In	10	0	1
119	Amitraz	CC1=CC(=C(C=C1)N=CN(C)C=NC2=C(C=C(C=C2)C)C)C	1	3	3	2	Moderate	4.24837	In	10	0	1
120	Amitrole	C1=NNC(=N1)N	1	3	3	2	Moderate	4.24837	In	10	0	1
123	Ammonium sulphamate	NS(=O)(=O)[O-]	1	3	3	2	Moderate	4.24837	In	10	0	1
124	Ammonium sulphate	[O-]S(=O)(=O)[O-]	1	3	3	2	Moderate	4.24837	In	10	0	1
125	Ammonium thiocyanate	C(#N)[S-]	1	3	3	2	Moderate	4.24837	In	10	0	1
126	Ampropylfos	CCC(N)P(=O)(O)O	1	3	3	2	Moderate	4.24837	In	10	0	1
127	Ancymidol	COC1=CC=C(C=C1)C(C2CC2)(C3=CN=CN=C3)O	1	3	3	2	Moderate	4.24837	In	10	0	1
128	Anilazine	C1=CC=C(C(=C1)NC2=NC(=NC(=N2)Cl)Cl)Cl	1	3	3	2	Moderate	4.24837	In	10	0	1
131	Aramite	CC(COC1=CC=C(C=C1)C(C)(C)C)OS(=O)OCCCl	1	3	3	2	Moderate	4.24837	In	10	0	1
132	Arsenic acid	O[As](=O)(O)O	1	3	3	2	Moderate	4.24837	In	10	0	1
138	Atraton	CCNC1=NC(=NC(=N1)OC)NC(C)C	1	3	3	2	Moderate	4.24837	In	10	0	1
139	Atrazine	CCNC1=NC(=NC(=N1)Cl)NC(C)C	1	3	3	2	Moderate	4.24837	In	10	0	1
140	Azaconazole	C1COC(O1)(CN2C=NC=N2)C3=C(C=C(C=C3)Cl)Cl	1	3	3	2	Moderate	4.24837	In	10	0	1
146	Aziprotryne	CC(C)NC1=NC(=NC(=N1)N=[N+]=[N-])SC	1	3	3	2	Moderate	4.24837	In	10	0	1
148	Azobenzene	C1=CC=C(C=C1)N=NC2=CC=CC=C2	1	3	3	2	Moderate	4.24837	In	10	0	1
149	Azocyclotin	C1CCC(CC1)[Sn](C2CCCCC2)(C3CCCCC3)N4C=NC=N4	1	3	3	2	Moderate	4.24837	In	10	0	1
152	Azoxybenzene	C1=CC=C(C=C1)N=[N+](C2=CC=CC=C2)[O-]	1	3	3	2	Moderate	4.24837	In	10	0	1
164	Benclothiaz	C1=CC2=C(C(=C1)Cl)SN=C2	1	3	3	2	Moderate	4.24837	In	10	0	1
166	Benfluralin	CCCCN(CC)C1=C(C=C(C=C1[N+](=O)[O-])C(F)(F)F)[N+](=O)[O-]	1	3	3	2	Moderate	4.24837	In	10	0	1
168	Benfuresate	CCS(=O)(=O)OC1=CC2=C(C=C1)OCC2(C)C	1	3	3	2	Moderate	4.24837	In	10	0	1
176	Bensultap	CN(C)C(CSS(=O)(=O)C1=CC=CC=C1)CSS(=O)(=O)C2=CC=CC=C2	1	3	3	2	Moderate	4.24837	In	10	0	1
181	Bentonite	O=[Al]O[Al]=O	1	3	3	2	Moderate	4.24837	In	10	0	1
184	Benzalkonium chloride	CC(C)(C)CC(C)(C)C1=CC=C(C=C1)OCCOCC[N+](C)(C)CC2=CC=CC=C2	1	3	3	2	Moderate	4.24837	In	10	0	1
187	Benzamorf	CCCCCCCCCCCCC1=CC=C(C=C1)S(O)(=O)=O	1	3	3	2	Moderate	4.24837	In	10	0	1
192	Benzofluor	CCSC1=CC(=C(C=C1)NS(=O)(=O)C)C(F)(F)F	1	3	3	2	Moderate	4.24837	In	10	0	1
212	Biphenyl	C1=CC=C(C=C1)C2=CC=CC=C2	1	3	3	2	Moderate	4.24837	In	10	0	1
214	Bis(2-chloroethyl)ether	C(CCl)OCCCl	1	3	3	2	Moderate	4.24837	In	10	0	1
215	Bis(methylmercury) sulphate	C[Hg]OS(=O)(=O)O[Hg]C	1	3	3	2	Moderate	4.24837	In	10	0	1
220	Bis-trichloromethyl sulfone	C(S(=O)(=O)C(Cl)(Cl)Cl)(Cl)(Cl)Cl	1	3	3	2	Moderate	4.24837	In	10	0	1
222	Bitertanol	CC(C)(C)C(C(N1C=NC=N1)OC2=CC=C(C=C2)C3=CC=CC=C3)O	1	3	3	2	Moderate	4.24837	In	10	0	1
223	Bithionol	C1=C(C=C(C(=C1Cl)O)SC2=CC(=CC(=C2O)Cl)Cl)Cl	1	3	3	2	Moderate	4.24837	In	10	0	1
233	Bromethalin	CN(C1=C(C=C(C=C1C(F)(F)F)[N+](=O)[O-])[N+](=O)[O-])C2=C(C=C(C=C2Br)Br)Br	1	3	3	2	Moderate	4.24837	In	10	0	1
239	Bromomethane	CBr	1	3	3	2	Moderate	4.24837	In	10	0	1
243	Bromoxynil	C1=C(C=C(C(=C1Br)O)Br)C#N	1	3	3	2	Moderate	4.24837	In	10	0	1
246	Bromoxynil-potassium	C1=C(C=C(C(=C1Br)[O-])Br)C#N	1	3	3	2	Moderate	4.24837	In	10	0	1
248	Bromuconazole	C1C(COC1(CN2C=NC=N2)C3=C(C=C(C=C3)Cl)Cl)Br	1	3	3	2	Moderate	4.24837	In	10	0	1
250	Bronopol	C(C(CO)([N+](=O)[O-])Br)O	1	3	3	2	Moderate	4.24837	In	10	0	1
254	Buminafos	CCCCNC1(CCCCC1)P(=O)(OCCCC)OCCCC	1	3	3	2	Moderate	4.24837	In	10	0	1
255	Bupirimate	CCCCC1=C(N=C(N=C1OS(=O)(=O)N(C)C)NCC)C	1	3	3	2	Moderate	4.24837	In	10	0	1
260	Butan-1-ol	CCCCO	1	3	3	2	Moderate	4.24837	In	10	0	1
261	Butanethiol	C(CC)CS	1	3	3	2	Moderate	4.24837	In	10	0	1
271	Butralin	CCC(C)NC1=C(C=C(C=C1[N+](=O)[O-])C(C)(C)C)[N+](=O)[O-]	1	3	3	2	Moderate	4.24837	In	10	0	1
276	Cacodylic acid	C[As](=O)(C)O	1	3	3	2	Moderate	4.24837	In	10	0	1
281	Calcium arsenate	[O-][As]([O-])([O-])=O	1	3	3	2	Moderate	4.24837	In	10	0	1
282	Calcium carbide	[C-]#[C-]	1	3	3	2	Moderate	4.24837	In	10	0	1
284	Calcium cyanamide	C(=[N-])=[N-]	1	3	3	2	Moderate	4.24837	In	10	0	1
285	Calcium phosphate	[O-]P([O-])([O-])=O	1	3	3	2	Moderate	4.24837	In	10	0	1
288	Camphechlor	C1C2C(C(C(C1(Cl)Cl)(C2(CCl)C(Cl)Cl)CCl)Cl)Cl	1	3	3	2	Moderate	4.24837	In	10	0	1
298	Carbon dioxide	C(=O)=O	1	3	3	2	Moderate	4.24837	In	10	0	1
299	Carbon disulphide	C(=S)=S	1	3	3	2	Moderate	4.24837	In	10	0	1
300	Carbon tetrachloride	C(Cl)(Cl)(Cl)Cl	1	3	3	2	Moderate	4.24837	In	10	0	1
310	Cetrimide	CCCCCCCCCCCCCC[N+](C)(C)C	1	3	3	2	Moderate	4.24837	In	10	0	1
313	Chlomethoxyfen	COC1=C(C=CC(=C1)OC2=C(C=C(C=C2)Cl)Cl)[N+](=O)[O-]	1	3	3	2	Moderate	4.24837	In	10	0	1
314	Chloral hydrate	C(C(Cl)(Cl)Cl)(O)O	1	3	3	2	Moderate	4.24837	In	10	0	1
315	Chloralose	C(C(C1C(C2C(O1)OC(O2)C(Cl)(Cl)Cl)O)O)O	1	3	3	2	Moderate	4.24837	In	10	0	1
318	Chloraniformethan	C1=CC(=C(C=C1NC(C(Cl)(Cl)Cl)NC=O)Cl)Cl	1	3	3	2	Moderate	4.24837	In	10	0	1
324	Chlorazine	CCN(CC)C1=NC(=NC(=N1)Cl)N(CC)CC	1	3	3	2	Moderate	4.24837	In	10	0	1
325	Chlorbenside	C1=CC(=CC=C1CSC2=CC=C(C=C2)Cl)Cl	1	3	3	2	Moderate	4.24837	In	10	0	1
331	Chlordimeform	CC1=C(C=CC(=C1)Cl)N=CN(C)C	1	3	3	2	Moderate	4.24837	In	10	0	1
332	Chlordimeform hydrochloride	CN(C)C=NC1=C(C)C=C(Cl)C=C1	1	3	3	2	Moderate	4.24837	In	10	0	1
337	Chlorfenapyr	CCOCN1C(=C(C(=C1C(F)(F)F)Br)C#N)C2=CC=C(C=C2)Cl	1	3	3	2	Moderate	4.24837	In	10	0	1
338	Chlorfenazole	C1=CC=C(C(=C1)C2=NC3=CC=CC=C3N2)Cl	1	3	3	2	Moderate	4.24837	In	10	0	1
339	Chlorfenethol	CC(C1=CC=C(C=C1)Cl)(C2=CC=C(C=C2)Cl)O	1	3	3	2	Moderate	4.24837	In	10	0	1
342	Chlorfenson	C1=CC(=CC=C1OS(=O)(=O)C2=CC=C(C=C2)Cl)Cl	1	3	3	2	Moderate	4.24837	In	10	0	1
343	Chlorfensulphide	C1=CC(=CC=C1SN=NC2=CC(=C(C=C2Cl)Cl)Cl)Cl	1	3	3	2	Moderate	4.24837	In	10	0	1
345	Chlorfluazole	C1=CC(=C(C2=C1NC(=N2)C(F)(F)F)Cl)Cl	1	3	3	2	Moderate	4.24837	In	10	0	1
354	Chlorine dioxide	O=Cl[O]	1	3	3	2	Moderate	4.24837	In	10	0	1
356	Chlormequat	C[N+](C)(C)CCCl	1	3	3	2	Moderate	4.24837	In	10	0	1
357	Chlornitrofen	C1=CC(=CC=C1[N+](=O)[O-])OC2=C(C=C(C=C2Cl)Cl)Cl	1	3	3	2	Moderate	4.24837	In	10	0	1
359	Chloroneb	COC1=CC(=C(C=C1Cl)OC)Cl	1	3	3	2	Moderate	4.24837	In	10	0	1
361	Chloropicrin	C([N+](=O)[O-])(Cl)(Cl)Cl	1	3	3	2	Moderate	4.24837	In	10	0	1
365	Chlorothalonil	C(#N)C1=C(C(=C(C(=C1Cl)Cl)Cl)C#N)Cl	1	3	3	2	Moderate	4.24837	In	10	0	1
366	Chlorotoluene	C1=CC=C(C=C1)CCl	1	3	3	2	Moderate	4.24837	In	10	0	1
369	Chloroxylenol	CC1=CC(=CC(=C1Cl)C)O	1	3	3	2	Moderate	4.24837	In	10	0	1
370	Chloroxynil	C1=C(C=C(C(=C1Cl)O)Cl)C#N	1	3	3	2	Moderate	4.24837	In	10	0	1
371	Chlorphonium	CCCC[P+](CCCC)(CCCC)CC1=C(C=C(C=C1)Cl)Cl	1	3	3	2	Moderate	4.24837	In	10	0	1
372	Chlorphonium chloride	CCCC[P+](CCCC)(CCCC)CC1=C(C=C(C=C1)Cl)Cl	1	3	3	2	Moderate	4.24837	In	10	0	1
379	Chlorquinox	C1=CN=C2C(=C(C(=C(C2=N1)Cl)Cl)Cl)Cl	1	3	3	2	Moderate	4.24837	In	10	0	1
389	Choline chloride	C[N+](C)(C)CCO	1	3	3	2	Moderate	4.24837	In	10	0	1
392	Cinmethylin	CC1=CC=CC=C1COC2CC3(CCC2(O3)C)C(C)C	1	3	3	2	Moderate	4.24837	In	10	0	1
406	Clofentezine	C1=CC=C(C(=C1)C2=NN=C(N=N2)C3=CC=CC=C3Cl)Cl	1	3	3	2	Moderate	4.24837	In	10	0	1
425	Copper II chloride	Cl[Cu]Cl	1	3	3	2	Moderate	4.24837	In	10	0	1
427	Copper oxychloride	O(Cl)Cl	1	3	3	2	Moderate	4.24837	In	10	0	1
428	Copper sulphate	[O-]S(=O)(=O)[O-]	1	3	3	2	Moderate	4.24837	In	10	0	1
436	Credazine	CC1=CC=CC=C1OC2=NN=CC=C2	1	3	3	2	Moderate	4.24837	In	10	0	1
437	Crimidine	CC1=CC(=NC(=N1)Cl)N(C)C	1	3	3	2	Moderate	4.24837	In	10	0	1
440	Cyanamide	C(#N)N	1	3	3	2	Moderate	4.24837	In	10	0	1
441	Cyanatryn	CCNC1=NC(=NC(=N1)SC)NC(C)(C)C#N	1	3	3	2	Moderate	4.24837	In	10	0	1
442	Cyanazine	CCNC1=NC(=NC(=N1)Cl)NC(C)(C)C#N	1	3	3	2	Moderate	4.24837	In	10	0	1
446	Cyazofamid	CC1=CC=C(C=C1)C2=C(N=C(N2S(=O)(=O)N(C)C)C#N)Cl	1	3	3	2	Moderate	4.24837	In	10	0	1
447	Cybutryne	CC(C)(C)NC1=NC(=NC(=N1)NC2CC2)SC	1	3	3	2	Moderate	4.24837	In	10	0	1
469	Cyhexatin	C1CCC(CC1)[Sn](C1CCCCC1)C1CCCCC1	1	3	3	2	Moderate	4.24837	In	10	0	1
475	Cyperquat	C[N+]1=CC=C(C=C1)C2=CC=CC=C2	1	3	3	2	Moderate	4.24837	In	10	0	1
476	Cyperquat iodide	C[n+]1ccc(cc1)c2ccccc2	1	3	3	2	Moderate	4.24837	In	10	0	1
478	Cyprazine	CC(C)NC1=NC(=NC(=N1)NC2CC2)Cl	1	3	3	2	Moderate	4.24837	In	10	0	1
479	Cyproconazole	CC(C1CC1)C(CN2C=NC=N2)(C3=CC=C(C=C3)Cl)O	1	3	3	2	Moderate	4.24837	In	10	0	1
480	Cyprodinil	CC1=NC(=NC(=C1)C2CC2)NC3=CC=CC=C3	1	3	3	2	Moderate	4.24837	In	10	0	1
486	Cyromazine	C1CC1NC2=NC(=NC(=N2)N)N	1	3	3	2	Moderate	4.24837	In	10	0	1
492	DCIP	CC(CCl)OC(C)CCl	1	3	3	2	Moderate	4.24837	In	10	0	1
493	DDD	C1=CC(=CC=C1C(C2=CC=C(C=C2)Cl)C(Cl)Cl)Cl	1	3	3	2	Moderate	4.24837	In	10	0	1
494	DDT	C1=CC(=CC=C1C(C2=CC=C(C=C2)Cl)C(Cl)(Cl)Cl)Cl	1	3	3	2	Moderate	4.24837	In	10	0	1
496	Decafentin	CCCCCCCCCC[P+](C1=CC=CC=C1)(C1=CC=CC=C1)C1=CC=CC=C1	1	3	3	2	Moderate	4.24837	In	10	0	1
510	Desmetryn	CC(C)NC1=NC(=NC(=N1)NC)SC	1	3	3	2	Moderate	4.24837	In	10	0	1
515	Diamidaphos	CNP(=O)(NC)OC1=CC=CC=C1	1	3	3	2	Moderate	4.24837	In	10	0	1
517	Diammonium phosphate	OP(=O)([O-])[O-]	1	3	3	2	Moderate	4.24837	In	10	0	1
519	Dibromochloropropane	C(C(CBr)Br)Cl	1	3	3	2	Moderate	4.24837	In	10	0	1
525	Dichlobenil	C1=CC(=C(C(=C1)Cl)C#N)Cl	1	3	3	2	Moderate	4.24837	In	10	0	1
528	Dichlofluanid	CN(C)S(=O)(=O)N(C1=CC=CC=C1)SC(F)(Cl)Cl	1	3	3	2	Moderate	4.24837	In	10	0	1
531	Dichlorophen	C1=CC(=C(C=C1Cl)CC2=C(C=CC(=C2)Cl)O)O	1	3	3	2	Moderate	4.24837	In	10	0	1
545	Diclobutrazol	CC(C)(C)C(C(CC1=C(C=C(C=C1)Cl)Cl)N2C=NC=N2)O.CC(C)(C)C(C(CC1=C(C=C(C=C1)Cl)Cl)N2C=NC=N2)O	1	3	3	2	Moderate	4.24837	In	10	0	1
550	Dicloran	C1=C(C=C(C(=C1Cl)N)Cl)[N+](=O)[O-]	1	3	3	2	Moderate	4.24837	In	10	0	1
553	Dicofol	C1=CC(=CC=C1C(C2=CC=C(C=C2)Cl)(C(Cl)(Cl)Cl)O)Cl	1	3	3	2	Moderate	4.24837	In	10	0	1
559	Didecyldimethylammonium chloride	CCCCCCCCCC[N+](C)(C)CCCCCCCCCC	1	3	3	2	Moderate	4.24837	In	10	0	1
567	Difenoconazole	CC1COC(O1)(CN2C=NC=N2)C3=C(C=C(C=C3)OC4=CC=C(C=C4)Cl)Cl	1	3	3	2	Moderate	4.24837	In	10	0	1
571	Difenzoquat	CN1C(=CC(=[N+]1C)C2=CC=CC=C2)C3=CC=CC=C3	1	3	3	2	Moderate	4.24837	In	10	0	1
572	Difenzoquat metilsulfate	CN1C(=CC(C2=CC=CC=C2)=[N+]1C)C1=CC=CC=C1	1	3	3	2	Moderate	4.24837	In	10	0	1
574	Diflovidazin	C1=CC=C(C(=C1)C2=NN=C(N=N2)C3=C(C=CC=C3F)F)Cl	1	3	3	2	Moderate	4.24837	In	10	0	1
578	Diflumetorim	CCC(C1=CC=C(C=C1)OC(F)F)NC2=NC=NC(=C2Cl)C	1	3	3	2	Moderate	4.24837	In	10	0	1
580	Dimefox	CN(C)P(=O)(N(C)C)F	1	3	3	2	Moderate	4.24837	In	10	0	1
585	Dimethametryn	CCNC1=NC(=NC(=N1)SC)NC(C)C(C)C	1	3	3	2	Moderate	4.24837	In	10	0	1
593	Dimethyl disulfide	CSSC	1	3	3	2	Moderate	4.24837	In	10	0	1
600	Dinex	C1CCC(CC1)C2=CC(=CC(=C2O)[N+](=O)[O-])[N+](=O)[O-]	1	3	3	2	Moderate	4.24837	In	10	0	1
601	Dinex-diclexine	OC1=C(C=C(C=C1C1CCCCC1)[N+]([O-])=O)[N+]([O-])=O	1	3	3	2	Moderate	4.24837	In	10	0	1
604	Dinitramine	CCN(CC)C1=C(C=C(C(=C1[N+](=O)[O-])N)C(F)(F)F)[N+](=O)[O-]	1	3	3	2	Moderate	4.24837	In	10	0	1
610	Dinosam	CCCC(C)C1=CC(=CC(=C1O)[N+](=O)[O-])[N+](=O)[O-]	1	3	3	2	Moderate	4.24837	In	10	0	1
614	Dinoterb	CC(C)(C)C1=CC(=CC(=C1O)[N+](=O)[O-])[N+](=O)[O-]	1	3	3	2	Moderate	4.24837	In	10	0	1
616	Diofenolan	CCC1OCC(O1)COC2=CC=C(C=C2)OC3=CC=CC=C3	1	3	3	2	Moderate	4.24837	In	10	0	1
622	Diphenylamine	C1=CC=C(C=C1)NC2=CC=CC=C2	1	3	3	2	Moderate	4.24837	In	10	0	1
623	Dipotassium phosphonate	OP([O-])[O-]	1	3	3	2	Moderate	4.24837	In	10	0	1
624	Dipropalin	CCCN(CCC)C1=C(C=C(C=C1[N+](=O)[O-])C)[N+](=O)[O-]	1	3	3	2	Moderate	4.24837	In	10	0	1
625	Dipropetryn	CCSC1=NC(=NC(=N1)NC(C)C)NC(C)C	1	3	3	2	Moderate	4.24837	In	10	0	1
627	Dipyrithione	C1=CC=[N+](C(=C1)SSC2=CC=CC=[N+]2[O-])[O-]	1	3	3	2	Moderate	4.24837	In	10	0	1
628	Diquat	C1C[N+]2=CC=CC=C2C3=CC=CC=[N+]31	1	3	3	2	Moderate	4.24837	In	10	0	1
629	Diquat dichloride	C[As](=O)([O-])[O-]	1	3	3	2	Moderate	4.24837	In	10	0	1
630	Disodium phosphonate	P([O-])([O-])=O	1	3	3	2	Moderate	4.24837	In	10	0	1
631	Disul	C1=CC(=C(C=C1Cl)Cl)OCCOS(=O)(=O)O	1	3	3	2	Moderate	4.24837	In	10	0	1
634	Disul-sodium	C1=CC(=C(C=C1Cl)Cl)OCCOS(=O)(=O)[O-]	1	3	3	2	Moderate	4.24837	In	10	0	1
640	DNOC	CC1=CC(=CC(=C1O)[N+](=O)[O-])[N+](=O)[O-]	1	3	3	2	Moderate	4.24837	In	10	0	1
641	Dodecylphenol ethoxylate	CCCCOCCOCCO	1	3	3	2	Moderate	4.24837	In	10	0	1
642	Dodemorph	CC1CN(CC(O1)C)C2CCCCCCCCCCC2	1	3	3	2	Moderate	4.24837	In	10	0	1
646	Ecolyst	CC[NH+](CC)CCOCC1=CC=C(C=C1)C.	1	3	3	2	Moderate	4.24837	In	10	0	1
657	Epichlorohydrin	C1C(O1)CCl	1	3	3	2	Moderate	4.24837	In	10	0	1
660	Epofenonane	CCC1=CC=C(C=C1)OCCC(CC)CCC2C(O2)(C)CC	1	3	3	2	Moderate	4.24837	In	10	0	1
661	Epoxiconazole	C1=CC=C(C(=C1)C2C(O2)(CN3C=NC=N3)C4=CC=C(C=C4)F)Cl	1	3	3	2	Moderate	4.24837	In	10	0	1
668	Etacelasil	COCCO[Si](CCCl)(OCCOC)OCCOC	1	3	3	2	Moderate	4.24837	In	10	0	1
669	Etaconazole	CCC1COC(O1)(CN2C=NC=N2)C3=C(C=C(C=C3)Cl)Cl	1	3	3	2	Moderate	4.24837	In	10	0	1
675	Ethanedial	C(=O)C=O	1	3	3	2	Moderate	4.24837	In	10	0	1
676	Ethanethiol	CCS	1	3	3	2	Moderate	4.24837	In	10	0	1
677	Ethanol	CCO	1	3	3	2	Moderate	4.24837	In	10	0	1
678	Ethephon	C(CCl)P(=O)(O)O	1	3	3	2	Moderate	4.24837	In	10	0	1
684	Ethiprole	CCS(=O)C1=C(N(N=C1C#N)C2=C(C=C(C=C2Cl)C(F)(F)F)Cl)N	1	3	3	2	Moderate	4.24837	In	10	0	1
687	Ethofumesate	CCOC1C(C2=C(O1)C=CC(=C2)OS(=O)(=O)C)(C)C	1	3	3	2	Moderate	4.24837	In	10	0	1
688	Ethohexadiol	CCCC(C(CC)CO)O	1	3	3	2	Moderate	4.24837	In	10	0	1
692	Ethoxylated p-nonylphenol	c1(ccc(OCCOCCO)cc1)CCCCCCCCC	1	3	3	2	Moderate	4.24837	In	10	0	1
695	Ethyl butyl nitrosamine	CCCCN(CC)N=O	1	3	3	2	Moderate	4.24837	In	10	0	1
696	Ethyl formate	CCOC=O	1	3	3	2	Moderate	4.24837	In	10	0	1
698	Ethyl-DDD	CCC1=CC=C(C=C1)C(C2=CC=C(C=C2)CC)C(Cl)Cl	1	3	3	2	Moderate	4.24837	In	10	0	1
699	Ethylene dichloride	C(CCl)Cl	1	3	3	2	Moderate	4.24837	In	10	0	1
700	Ethylene glycol	C(CO)O	1	3	3	2	Moderate	4.24837	In	10	0	1
703	Ethylicin	CCSS(=O)(=O)CC	1	3	3	2	Moderate	4.24837	In	10	0	1
704	Ethylmercury bromide	C[CH2]	1	3	3	2	Moderate	4.24837	In	10	0	1
705	Etinofen	CCOCC1=CC(=CC(=C1O)[N+](=O)[O-])[N+](=O)[O-]	1	3	3	2	Moderate	4.24837	In	10	0	1
706	Etofenprox	CCOC1=CC=C(C=C1)C(C)(C)COCC2=CC(=CC=C2)OC3=CC=CC=C3	1	3	3	2	Moderate	4.24837	In	10	0	1
708	Etridiazole	CCOC1=NC(=NS1)C(Cl)(Cl)Cl	1	3	3	2	Moderate	4.24837	In	10	0	1
712	Fenaminosulf	CN(C)C1=CC=C(C=C1)N=NS(=O)(=O)[O-]	1	3	3	2	Moderate	4.24837	In	10	0	1
715	Fenapanil	CCCCC(CN1C=CN=C1)(C#N)C2=CC=CC=C2	1	3	3	2	Moderate	4.24837	In	10	0	1
716	Fenarimol	C1=CC=C(C(=C1)C(C2=CC=C(C=C2)Cl)(C3=CN=CN=C3)O)Cl	1	3	3	2	Moderate	4.24837	In	10	0	1
719	Fenazaquin	CC(C)(C)C1=CC=C(C=C1)CCOC2=NC=NC3=CC=CC=C32	1	3	3	2	Moderate	4.24837	In	10	0	1
720	Fenbuconazole	C1=CC=C(C=C1)C(CCC2=CC=C(C=C2)Cl)(CN3C=NC=N3)C#N	1	3	3	2	Moderate	4.24837	In	10	0	1
721	Fenbutatin oxide	CC(C)(C[Sn](CC(C)(C)C1=CC=CC=C1)(CC(C)(C)C2=CC=CC=C2)O[Sn](CC(C)(C)C3=CC=CC=C3)(CC(C)(C)C4=CC=CC=C4)CC(C)(C)C5=CC=CC=C5)C6=CC=CC=C6	1	3	3	2	Moderate	4.24837	In	10	0	1
725	Fenclorim	C1=CC=C(C=C1)C2=NC(=CC(=N2)Cl)Cl	1	3	3	2	Moderate	4.24837	In	10	0	1
748	Fenpiclonil	C1=CC(=C(C(=C1)Cl)Cl)C2=CNC=C2C#N	1	3	3	2	Moderate	4.24837	In	10	0	1
752	Fenpropidin	CC(CC1=CC=C(C=C1)C(C)(C)C)CN2CCCCC2	1	3	3	2	Moderate	4.24837	In	10	0	1
753	Fenpropimorph	CC1CN(CC(O1)C)CC(C)CC2=CC=C(C=C2)C(C)(C)C	1	3	3	2	Moderate	4.24837	In	10	0	1
760	Fenson	C1=CC=C(C=C1)S(=O)(=O)OC2=CC=C(C=C2)Cl	1	3	3	2	Moderate	4.24837	In	10	0	1
768	Fentin chloride	C1=CC=C(C=C1)[Sn](C2=CC=CC=C2)(C3=CC=CC=C3)Cl	1	3	3	2	Moderate	4.24837	In	10	0	1
769	Fentin hydroxide	C1=CC=C(C=C1)[Sn](C1=CC=CC=C1)C1=CC=CC=C1	1	3	3	2	Moderate	4.24837	In	10	0	1
776	Ferric phosphate	[O-]P(=O)([O-])[O-]	1	3	3	2	Moderate	4.24837	In	10	0	1
777	Fipronil	C1=C(C=C(C(=C1Cl)N2C(=C(C(=N2)C#N)S(=O)C(F)(F)F)N)Cl)C(F)(F)F	1	3	3	2	Moderate	4.24837	In	10	0	1
797	Fluazinam	C1=C(C=NC(=C1Cl)NC2=C(C=C(C(=C2[N+](=O)[O-])Cl)C(F)(F)F)[N+](=O)[O-])C(F)(F)F	1	3	3	2	Moderate	4.24837	In	10	0	1
805	Fluchloralin	CCCN(CCCl)C1=C(C=C(C=C1[N+](=O)[O-])C(F)(F)F)[N+](=O)[O-]	1	3	3	2	Moderate	4.24837	In	10	0	1
812	Fludioxonil	C1=CC(=C2C(=C1)OC(O2)(F)F)C3=CNC=C3C#N	1	3	3	2	Moderate	4.24837	In	10	0	1
816	Flufenerim	CC(C1=C(C(=NC=N1)NCCC2=CC=C(C=C2)OC(F)(F)F)Cl)F	1	3	3	2	Moderate	4.24837	In	10	0	1
820	Flufenprox	CCOC1=CC=C(C=C1)C(COCC2=CC(=CC=C2)OC3=CC=C(C=C3)Cl)C(F)(F)F	1	3	3	2	Moderate	4.24837	In	10	0	1
825	Flumetralin	CCN(CC1=C(C=CC=C1Cl)F)C2=C(C=C(C=C2[N+](=O)[O-])C(F)(F)F)[N+](=O)[O-]	1	3	3	2	Moderate	4.24837	In	10	0	1
826	Flumetsulam	CC1=NC2=NC(=NN2C=C1)S(=O)(=O)NC3=C(C=CC=C3F)F	1	3	3	2	Moderate	4.24837	In	10	0	1
837	Fluorbenside	C1=CC(=CC=C1CSC2=CC=C(C=C2)F)Cl	1	3	3	2	Moderate	4.24837	In	10	0	1
840	Fluorodifen	C1=CC(=CC=C1[N+](=O)[O-])OC2=C(C=C(C=C2)C(F)(F)F)[N+](=O)[O-]	1	3	3	2	Moderate	4.24837	In	10	0	1
843	Fluoromidine	C1=C2C(=NC=C1Cl)N=C(N2)C(F)(F)F	1	3	3	2	Moderate	4.24837	In	10	0	1
844	Fluoronitrofen	C1=CC(=CC=C1[N+](=O)[O-])OC2=C(C=C(C=C2Cl)Cl)F	1	3	3	2	Moderate	4.24837	In	10	0	1
846	Fluotrimazole	C1=CC=C(C=C1)C(C2=CC=CC=C2)(C3=CC(=CC=C3)C(F)(F)F)N4C=NC=N4	1	3	3	2	Moderate	4.24837	In	10	0	1
850	Flupentiofenox	C1=C(C(=CC(=C1F)OCCCCCSC(F)(F)F)S(=O)CC(F)(F)F)O	1	3	3	2	Moderate	4.24837	In	10	0	1
853	Flupropadine	CC(C)(C)C1CCN(CC1)CC#CC2=CC(=CC(=C2)C(F)(F)F)C(F)(F)F	1	3	3	2	Moderate	4.24837	In	10	0	1
854	Flupropadine hydrochloride	CC(C)(C)C1CCN(CC#CC2=CC(=CC(=C2)C(F)(F)F)C(F)(F)F)CC1	1	3	3	2	Moderate	4.24837	In	10	0	1
869	Flurprimidol	CC(C)C(C1=CC=C(C=C1)OC(F)(F)F)(C2=CN=CN=C2)O	1	3	3	2	Moderate	4.24837	In	10	0	1
871	Flusilazole	C[Si](CN1C=NC=N1)(C2=CC=C(C=C2)F)C3=CC=C(C=C3)F	1	3	3	2	Moderate	4.24837	In	10	0	1
872	Flusulfamide	C1=CC(=C(C=C1[N+](=O)[O-])Cl)NS(=O)(=O)C2=CC(=C(C=C2)Cl)C(F)(F)F	1	3	3	2	Moderate	4.24837	In	10	0	1
877	Flutriafol	C1=CC=C(C(=C1)C(CN2C=NC=N2)(C3=CC=C(C=C3)F)O)F	1	3	3	2	Moderate	4.24837	In	10	0	1
887	Formaldehyde	C=O	1	3	3	2	Moderate	4.24837	In	10	0	1
893	Fosetyl	CCOP(=O)=O	1	3	3	2	Moderate	4.24837	In	10	0	1
895	Fospirate	COP(=O)(OC)OC1=NC(=C(C=C1Cl)Cl)Cl	1	3	3	2	Moderate	4.24837	In	10	0	1
898	Fuberidazole	C1=CC=C2C(=C1)NC(=N2)C3=CC=CO3	1	3	3	2	Moderate	4.24837	In	10	0	1
902	Furalane	C1COC(O1)C2=CC=CO2	1	3	3	2	Moderate	4.24837	In	10	0	1
907	Furconazole	C1CC(OC1OCC(F)(F)F)(CN2C=NC=N2)C3=C(C=C(C=C3)Cl)Cl	1	3	3	2	Moderate	4.24837	In	10	0	1
909	Furfural	C1=COC(=C1)C=O	1	3	3	2	Moderate	4.24837	In	10	0	1
912	Furyloxyfen	C1COCC1OC2=C(C=CC(=C2)OC3=C(C=C(C=C3)C(F)(F)F)Cl)[N+](=O)[O-]	1	3	3	2	Moderate	4.24837	In	10	0	1
914	Gliftor	OC(CF)CF	1	3	3	2	Moderate	4.24837	In	10	0	1
917	Glutaraldehyde	C(CC=O)CC=O	1	3	3	2	Moderate	4.24837	In	10	0	1
918	Glycerin	C(C(CO)O)O	1	3	3	2	Moderate	4.24837	In	10	0	1
930	Gypsum	O.O.[O-]S(=O)(=O)[O-]	1	3	3	2	Moderate	4.24837	In	10	0	1
934	Halfenprox	CC(C)(COCC1=CC(=CC=C1)OC2=CC=CC=C2)C3=CC=C(C=C3)OC(F)(F)Br	1	3	3	2	Moderate	4.24837	In	10	0	1
950	Hexachlorobenzene	C1(=C(C(=C(C(=C1Cl)Cl)Cl)Cl)Cl)Cl	1	3	3	2	Moderate	4.24837	In	10	0	1
951	Hexachlorophene	C1=C(C(=C(C(=C1Cl)Cl)CC2=C(C(=CC(=C2Cl)Cl)Cl)O)O)Cl	1	3	3	2	Moderate	4.24837	In	10	0	1
952	Hexaconazole	CCCCC(CN1C=NC=N1)(C2=C(C=C(C=C2)Cl)Cl)O	1	3	3	2	Moderate	4.24837	In	10	0	1
955	Hexaflurate	F[As-](F)(F)(F)(F)F	1	3	3	2	Moderate	4.24837	In	10	0	1
957	Hexylene glycol	CC(CC(C)(C)O)O	1	3	3	2	Moderate	4.24837	In	10	0	1
960	Huanjunzuo	C1CC[C@H]([C@@](CC1)(C2=CC=C(C=C2)Cl)O)N3C=NC=N3	1	3	3	2	Moderate	4.24837	In	10	0	1
963	Hydroquinone	C1=CC(=CC=C1O)O	1	3	3	2	Moderate	4.24837	In	10	0	1
992	Indaziflam	CC1CC2=C(C1NC3=NC(=NC(=N3)N)C(C)F)C=C(C=C2)C	1	3	3	2	Moderate	4.24837	In	10	0	1
1000	Iodomethane	CI	1	3	3	2	Moderate	4.24837	In	10	0	1
1005	Ioxynil	C1=C(C=C(C(=C1I)O)I)C#N	1	3	3	2	Moderate	4.24837	In	10	0	1
1007	Ipazine	CCN(CC)C1=NC(=NC(=N1)NC(C)C)Cl	1	3	3	2	Moderate	4.24837	In	10	0	1
1008	Ipconazole	CC(C)C1CCC(C1(CN2C=NC=N2)O)CC3=CC=C(C=C3)Cl	1	3	3	2	Moderate	4.24837	In	10	0	1
1010	Ipfentrifluconazole	CC(C)C(CN1C=NC=N1)(C2=C(C=C(C=C2)OC3=CC=C(C=C3)Cl)C(F)(F)F)O	1	3	3	2	Moderate	4.24837	In	10	0	1
1011	Ipflufenoquin	CC1=C(C=C2C=CC(=C(C2=N1)F)F)OC3=C(C(=CC=C3)F)C(C)(C)O	1	3	3	2	Moderate	4.24837	In	10	0	1
1036	Isopropalin	CCCN(CCC)C1=C(C=C(C=C1[N+](=O)[O-])C(C)C)[N+](=O)[O-]	1	3	3	2	Moderate	4.24837	In	10	0	1
1041	Isopyrimol	CC(C)C(C1=CC=C(C=C1)Cl)(C2=CN=CN=C2)O	1	3	3	2	Moderate	4.24837	In	10	0	1
1053	Izopamfos	CCCCCCCCCOCCC[NH3+]	1	3	3	2	Moderate	4.24837	In	10	0	1
1056	Kaolin	O=[Al]O[Si](=O)O[Si](=O)O[Al]=O	1	3	3	2	Moderate	4.24837	In	10	0	1
1069	Lead arsenate	O[As](=O)([O-])[O-]	1	3	3	2	Moderate	4.24837	In	10	0	1
1072	Lime sulphur	[S-]SSS[S-]	1	3	3	2	Moderate	4.24837	In	10	0	1
1074	Lindane	C1(C(C(C(C(C1Cl)Cl)Cl)Cl)Cl)Cl	1	3	3	2	Moderate	4.24837	In	10	0	1
1076	Lithium perfluorooctane sulfonate	C(C(C(C(C(F)(F)S(=O)(=O)[O-])(F)F)(F)F)(F)F)(C(C(C(F)(F)F)(F)F)(F)F)(F)F	1	3	3	2	Moderate	4.24837	In	10	0	1
1090	Mazidox	CN(C)P(=O)(N=[N+]=[N-])N(C)C	1	3	3	2	Moderate	4.24837	In	10	0	1
1117	Medetomidine	CC1=C(C(=CC=C1)C(C)C2=CN=CN2)C	1	3	3	2	Moderate	4.24837	In	10	0	1
1118	Medinoterb	CC1=C(C=C(C(=C1[N+](=O)[O-])O)C(C)(C)C)[N+](=O)[O-]	1	3	3	2	Moderate	4.24837	In	10	0	1
1123	Mefentrifluconazole	CC(CN1C=NC=N1)(C2=C(C=C(C=C2)OC3=CC=C(C=C3)Cl)C(F)(F)F)O	1	3	3	2	Moderate	4.24837	In	10	0	1
1126	Mepanipyrim	CC#CC1=CC(=NC(=N1)NC2=CC=CC=C2)C	1	3	3	2	Moderate	4.24837	In	10	0	1
1130	Mepiquat	C[N+]1(CCCCC1)C	1	3	3	2	Moderate	4.24837	In	10	0	1
1140	Metaldehyde	CC1OC(OC(OC(O1)C)C)C	1	3	3	2	Moderate	4.24837	In	10	0	1
1149	Metconazole	CC1(CCC(C1(CN2C=NC=N2)O)CC3=CC=C(C=C3)Cl)C	1	3	3	2	Moderate	4.24837	In	10	0	1
1150	Metepa	CC1CN1P(=O)(N2CC2C)N3CC3C	1	3	3	2	Moderate	4.24837	In	10	0	1
1166	Methoprotryne	CC(C)NC1=NC(=NC(=N1)NCCCOC)SC	1	3	3	2	Moderate	4.24837	In	10	0	1
1167	Methoxychlor	COC1=CC=C(C=C1)C(C2=CC=C(C=C2)OC)C(Cl)(Cl)Cl	1	3	3	2	Moderate	4.24837	In	10	0	1
1171	Methyl ether cellulose	COC2OC(COC)[C@@H](O[C@@H]1OC(COC)C(OC)C(OC)C1OC)C(OC)C2OC	1	3	3	2	Moderate	4.24837	In	10	0	1
1173	Methyl isothiocyanate	CN=C=S	1	3	3	2	Moderate	4.24837	In	10	0	1
1176	Methylarsenic sulphide	C[As]=S	1	3	3	2	Moderate	4.24837	In	10	0	1
1177	Methylarsonic acid	C[As](=O)(O)O	1	3	3	2	Moderate	4.24837	In	10	0	1
1179	Methylene bisthiocyanate	C(SC#N)SC#N	1	3	3	2	Moderate	4.24837	In	10	0	1
1200	Mipafox	CC(C)NP(=O)(NC(C)C)F	1	3	3	2	Moderate	4.24837	In	10	0	1
1201	Mirex	C12(C3(C4(C5(C3(C(C1(C5(C2(C4(Cl)Cl)Cl)Cl)Cl)(Cl)Cl)Cl)Cl)Cl)Cl)Cl	1	3	3	2	Moderate	4.24837	In	10	0	1
1209	Monosodium methylarsonate	C[As](=O)(O)[O-]	1	3	3	2	Moderate	4.24837	In	10	0	1
1218	Myclobutanil	CCCCC(CN1C=NC=N1)(C#N)C2=CC=C(C=C2)Cl	1	3	3	2	Moderate	4.24837	In	10	0	1
1219	Myclobutanil hydrochloride	CC(CCC(CN1C=NC=N1)(C#N)C2=CC=C(C=C2)Cl)O	1	3	3	2	Moderate	4.24837	In	10	0	1
1226	Naled	COP(=O)(OC)OC(C(Cl)(Cl)Br)Br	1	3	3	2	Moderate	4.24837	In	10	0	1
1227	Nanosilver-silica composite	C1=CC=C2C=CC=CC2=C1	1	3	3	2	Moderate	4.24837	In	10	0	1
1228	Naphthalene	C1=CC=C2C=CC=CC2=C1	1	3	3	2	Moderate	4.24837	In	10	0	1
1241	Nitrapyrin	C1=CC(=NC(=C1)Cl)C(Cl)(Cl)Cl	1	3	3	2	Moderate	4.24837	In	10	0	1
1243	Nitrofen	C1=CC(=CC=C1[N+](=O)[O-])OC2=C(C=C(C=C2)Cl)Cl	1	3	3	2	Moderate	4.24837	In	10	0	1
1248	N-nitrosodimethylamine	CN(C)N=O	1	3	3	2	Moderate	4.24837	In	10	0	1
1251	Nornicotine	C1CC(NC1)C2=CN=CC=C2	1	3	3	2	Moderate	4.24837	In	10	0	1
1255	Nuarimol	C1=CC=C(C(=C1)C(C2=CC=C(C=C2)F)(C3=CN=CN=C3)O)Cl	1	3	3	2	Moderate	4.24837	In	10	0	1
1256	O,O'-DDT	C1=CC=C(C(=C1)C(C2=CC=CC=C2Cl)C(Cl)(Cl)Cl)Cl	1	3	3	2	Moderate	4.24837	In	10	0	1
1257	O,P'-DDT	C1=CC=C(C(=C1)C(C2=CC=C(C=C2)Cl)C(Cl)(Cl)Cl)Cl	1	3	3	2	Moderate	4.24837	In	10	0	1
1258	Octachlorodipropyl ether	CCC(OC(C(C(Cl)(Cl)Cl)(Cl)Cl)(Cl)Cl)Cl	1	3	3	2	Moderate	4.24837	In	10	0	1
1276	Oxine-copper	[O-]C1=CC=CC2=C1N=CC=C2	1	3	3	2	Moderate	4.24837	In	10	0	1
1283	Oxyfluorfen	CCOC1=C(C=CC(=C1)OC2=C(C=C(C=C2)C(F)(F)F)Cl)[N+](=O)[O-]	1	3	3	2	Moderate	4.24837	In	10	0	1
1285	Paraquat	C[N+]1=CC=C(C=C1)C2=CC=[N+](C=C2)C	1	3	3	2	Moderate	4.24837	In	10	0	1
1288	Parinol	C1=CC(=CN=C1)C(C2=CC=C(C=C2)Cl)(C3=CC=C(C=C3)Cl)O	1	3	3	2	Moderate	4.24837	In	10	0	1
1291	Penconazole	CCCC(CN1C=NC=N1)C2=C(C=C(C=C2)Cl)Cl	1	3	3	2	Moderate	4.24837	In	10	0	1
1293	Pendimethalin	CCC(CC)NC1=C(C=C(C(=C1[N+](=O)[O-])C)C)[N+](=O)[O-]	1	3	3	2	Moderate	4.24837	In	10	0	1
1296	Penoxsulam	COC1=CN=C(N2C1=NC(=N2)NS(=O)(=O)C3=C(C=CC=C3OCC(F)F)C(F)(F)F)OC	1	3	3	2	Moderate	4.24837	In	10	0	1
1297	Pentachlorophenol	C1(=C(C(=C(C(=C1Cl)Cl)Cl)Cl)Cl)O	1	3	3	2	Moderate	4.24837	In	10	0	1
1301	Perfluidone	CC1=C(C=CC(=C1)S(=O)(=O)C2=CC=CC=C2)NS(=O)(=O)C(F)(F)F	1	3	3	2	Moderate	4.24837	In	10	0	1
1311	Phenylmercury chloride	C1=CC=C(C=C1)[Hg]Cl	1	3	3	2	Moderate	4.24837	In	10	0	1
1312	Phenylmercury nitrate	C1=CC=C(C=C1)[Hg]O[N+](=O)[O-]	1	3	3	2	Moderate	4.24837	In	10	0	1
1317	Phosdiphen	CCOP(=O)(OC1=C(C=C(C=C1)Cl)Cl)OC2=C(C=C(C=C2)Cl)Cl	1	3	3	2	Moderate	4.24837	In	10	0	1
1322	Phosphane	P	1	3	3	2	Moderate	4.24837	In	10	0	1
1334	Piperonyl butoxide	CCCCOCCOCCOCC1=CC2=C(C=C1CCC)OCO2	1	3	3	2	Moderate	4.24837	In	10	0	1
1336	Piperonyl sulfoxide	CCCCCCCCS(=O)C(C)CC1=CC2=C(C=C1)OCO2	1	3	3	2	Moderate	4.24837	In	10	0	1
1339	Piprotal	O1C2=CC=C(C=C2OC1)C(OCCOCCOCCCC)OCCOCCOCCCC	1	3	3	2	Moderate	4.24837	In	10	0	1
1344	P-nonylphenol	CCCCCCCCCC1=CC=C(C=C1)O	1	3	3	2	Moderate	4.24837	In	10	0	1
1353	Procyazine	CC(C)(C#N)NC1=NC(=NC(=N1)NC2CC2)Cl	1	3	3	2	Moderate	4.24837	In	10	0	1
1355	Prodiamine	CCCN(CCC)C1=C(C=C(C(=C1[N+](=O)[O-])N)C(F)(F)F)[N+](=O)[O-]	1	3	3	2	Moderate	4.24837	In	10	0	1
1358	Profluralin	CCCN(CC1CC1)C2=C(C=C(C=C2[N+](=O)[O-])C(F)(F)F)[N+](=O)[O-]	1	3	3	2	Moderate	4.24837	In	10	0	1
1367	Prometon	CC(C)NC1=NC(=NC(=N1)OC)NC(C)C	1	3	3	2	Moderate	4.24837	In	10	0	1
1368	Prometryn	CC(C)NC1=NC(=NC(=N1)SC)NC(C)C	1	3	3	2	Moderate	4.24837	In	10	0	1
1375	Propargite	CC(C)(C)C1=CC=C(C=C1)OC2CCCCC2OS(=O)OCC#C	1	3	3	2	Moderate	4.24837	In	10	0	1
1376	Propazine	CC(C)NC1=NC(=NC(=N1)Cl)NC(C)C	1	3	3	2	Moderate	4.24837	In	10	0	1
1379	Propiconazole	CCCC1COC(O1)(CN2C=NC=N2)C3=C(C=C(C=C3)Cl)Cl	1	3	3	2	Moderate	4.24837	In	10	0	1
1386	Propylene glycol	CC(CO)O	1	3	3	2	Moderate	4.24837	In	10	0	1
1397	Protrifenbute	C1CC1C(CCCC2=CC(=C(C=C2)F)OC3=CC=CC=C3)C4=CC=C(C=C4)Cl	1	3	3	2	Moderate	4.24837	In	10	0	1
1406	Pyraclonil	CN(CC#C)C1=C(C=NN1C2=NN3CCCCC3=C2Cl)C#N	1	3	3	2	Moderate	4.24837	In	10	0	1
1409	Pyrafluprole	C1=CN=C(C=N1)CNC2=C(C(=NN2C3=C(C=C(C=C3Cl)C(F)(F)F)Cl)C#N)SCF	1	3	3	2	Moderate	4.24837	In	10	0	1
1416	Pyrazachlor	CC1=C(C(=NN1)Cl)[N+](=O)[O-]	1	3	3	2	Moderate	4.24837	In	10	0	1
1429	Pyridachlometyl	CC1=C(C(=C(N=N1)Cl)C2=C(C=CC=C2F)F)C3=CC=CC=C3	1	3	3	2	Moderate	4.24837	In	10	0	1
1438	Pyrimethanil	CC1=CC(=NC(=N1)NC2=CC=CC=C2)C	1	3	3	2	Moderate	4.24837	In	10	0	1
1439	Pyrimidifen	CCC1=C(C(=NC=N1)NCCOC2=C(C(=C(C=C2)CCOCC)C)C)Cl	1	3	3	2	Moderate	4.24837	In	10	0	1
1445	Pyripropanol	C1=CC=NC(=C1)CCCO	1	3	3	2	Moderate	4.24837	In	10	0	1
1446	Pyriproxyfen	CC(COC1=CC=C(C=C1)OC2=CC=CC=C2)OC3=CC=CC=N3	1	3	3	2	Moderate	4.24837	In	10	0	1
1447	Pyrisoxazole	CC1(CC(ON1C)C2=CC=C(C=C2)Cl)C3=CN=CC=C3	1	3	3	2	Moderate	4.24837	In	10	0	1
1451	Pyroxsulam	COC1=CC(=NC2=NC(=NN12)NS(=O)(=O)C3=C(C=CN=C3OC)C(F)(F)F)OC	1	3	3	2	Moderate	4.24837	In	10	0	1
1462	Quinoxyfen	C1=CC(=CC=C1OC2=C3C(=CC(=CC3=NC=C2)Cl)Cl)F	1	3	3	2	Moderate	4.24837	In	10	0	1
1464	Quintozene	C1(=C(C(=C(C(=C1Cl)Cl)Cl)Cl)Cl)[N+](=O)[O-]	1	3	3	2	Moderate	4.24837	In	10	0	1
1467	Rabenzazole	CC1=CC(=NN1C2=NC3=CC=CC=C3N2)C	1	3	3	2	Moderate	4.24837	In	10	0	1
1470	Rimisoxafen	C1=CC(=C(C(=C1)Cl)C2=CC(=NO2)C(F)F)OC3=NC=C(C=N3)Cl	1	3	3	2	Moderate	4.24837	In	10	0	1
1473	Saisentong	C(NC1=NN=C(S1)[S-])NC2=NN=C(S2)[S-]	1	3	3	2	Moderate	4.24837	In	10	0	1
1475	Schradan	CN(C)P(=O)(N(C)C)OP(=O)(N(C)C)N(C)C	1	3	3	2	Moderate	4.24837	In	10	0	1
1476	Seboctylamine	CCCCCCCCNCCNCCNCCCCCCCC	1	3	3	2	Moderate	4.24837	In	10	0	1
1477	Sebuthylazine	CCC(C)NC1=NC(=NC(=N1)NCC)Cl	1	3	3	2	Moderate	4.24837	In	10	0	1
1478	Secbumeton	CCC(C)NC1=NC(=NC(=N1)NCC)OC	1	3	3	2	Moderate	4.24837	In	10	0	1
1480	Semiamitraz hydrochloride	C\N=C/Nc1ccc(C)cc1C	1	3	3	2	Moderate	4.24837	In	10	0	1
1481	Sesamex	CCOCCOCCOC(C)OC1=CC2=C(C=C1)OCO2	1	3	3	2	Moderate	4.24837	In	10	0	1
1485	Silafluofen	CCOC1=CC=C(C=C1)[Si](C)(C)CCCC2=CC(=C(C=C2)F)OC3=CC=CC=C3	1	3	3	2	Moderate	4.24837	In	10	0	1
1486	Silatrane	C1CO[Si]2(OCCN1CCO2)C3=CC=C(C=C3)Cl	1	3	3	2	Moderate	4.24837	In	10	0	1
1487	Silica	O=[Si]=O	1	3	3	2	Moderate	4.24837	In	10	0	1
1489	Simazine	CCNC1=NC(=NC(=N1)Cl)NCC	1	3	3	2	Moderate	4.24837	In	10	0	1
1490	Simeconazole	C[Si](C)(C)CC(CN1C=NC=N1)(C2=CC=C(C=C2)F)O	1	3	3	2	Moderate	4.24837	In	10	0	1
1491	Simeton	CCNC1=NC(=NC(=N1)OC)NCC	1	3	3	2	Moderate	4.24837	In	10	0	1
1492	Simetryn	CCNC1=NC(=NC(=N1)SC)NCC	1	3	3	2	Moderate	4.24837	In	10	0	1
1496	Sodium 5-nitroguaiacolate	COC1=C(C=C(C=C1)[N+](=O)[O-])[O-]	1	3	3	2	Moderate	4.24837	In	10	0	1
1498	Sodium hexafluorosilicate	F[Si-2](F)(F)(F)(F)F	1	3	3	2	Moderate	4.24837	In	10	0	1
1499	Sodium lignosulfonate	COC1=CC=CC(=C1O)CC(CS(=O)(=O)[O-])OC2=C(C=C(C=C2)CCCS(=O)(=O)[O-])OC	1	3	3	2	Moderate	4.24837	In	10	0	1
1500	Sodium metabisulphite	COC1=CC=CC(=C1O)C[C@H](CS(=O)(=O)[O-])OC2=C(C=C(C=C2)CCCS(=O)(=O)[O-])OC	1	3	3	2	Moderate	4.24837	In	10	0	1
1503	Sodium o-nitrophenolate	C1=CC=C(C(=C1)[N+](=O)[O-])[O-]	1	3	3	2	Moderate	4.24837	In	10	0	1
1504	Sodium p-nitrophenolate	C1=CC(=CC=C1[N+](=O)[O-])[O-]	1	3	3	2	Moderate	4.24837	In	10	0	1
1505	Sodium silver thiosulphate	[O-]S([O-])(=O)=S	1	3	3	2	Moderate	4.24837	In	10	0	1
1506	Sodium tetraborate pentahydrate	OB(O)O	1	3	3	2	Moderate	4.24837	In	10	0	1
1508	Sorbitol	C(C(C(C(C(CO)O)O)O)O)O	1	3	3	2	Moderate	4.24837	In	10	0	1
1516	Spiroxamine	CCCN(CC)CC1COC2(O1)CCC(CC2)C(C)(C)C	1	3	3	2	Moderate	4.24837	In	10	0	1
1523	Sulfluramid	CCNS(=O)(=O)C(C(C(C(C(C(C(C(F)(F)F)(F)F)(F)F)(F)F)(F)F)(F)F)(F)F)(F)F	1	3	3	2	Moderate	4.24837	In	10	0	1
1528	Sulfoxaflor	CC(C1=CN=C(C=C1)C(F)(F)F)S(=NC#N)(=O)C	1	3	3	2	Moderate	4.24837	In	10	0	1
1529	Sulfuryl fluoride	O=S(=O)(F)F	1	3	3	2	Moderate	4.24837	In	10	0	1
1530	Sulphaquinoxaline	C1=CC=C2C(=C1)N=CC(=N2)NS(=O)(=O)C3=CC=C(C=C3)N	1	3	3	2	Moderate	4.24837	In	10	0	1
1531	Sulphuric acid	OS(=O)(=O)O	1	3	3	2	Moderate	4.24837	In	10	0	1
1538	Tebuconazole	CC(C)(C)C(CCC1=CC=C(C=C1)Cl)(CN2C=NC=N2)O	1	3	3	2	Moderate	4.24837	In	10	0	1
1546	Tecnazene	C1=C(C(=C(C(=C1Cl)Cl)[N+](=O)[O-])Cl)Cl	1	3	3	2	Moderate	4.24837	In	10	0	1
1558	Terbumeton	CCNC1=NC(=NC(=N1)OC)NC(C)(C)C	1	3	3	2	Moderate	4.24837	In	10	0	1
1559	Terbuthylazine	CCNC1=NC(=NC(=N1)Cl)NC(C)(C)C	1	3	3	2	Moderate	4.24837	In	10	0	1
1560	Terbutryn	CCNC1=NC(=NC(=N1)SC)NC(C)(C)C	1	3	3	2	Moderate	4.24837	In	10	0	1
1561	Tetcyclacis	C1C2C3C(C1C4C2N=NN4C5=CC=C(C=C5)Cl)N=N3	1	3	3	2	Moderate	4.24837	In	10	0	1
1564	Tetraconazole	C1=CC(=C(C=C1Cl)Cl)C(CN2C=NC=N2)COC(C(F)F)(F)F	1	3	3	2	Moderate	4.24837	In	10	0	1
1565	Tetradifon	CCOP(=O)(OCC)OP(=O)(OCC)OCC	1	3	3	2	Moderate	4.24837	In	10	0	1
1566	Tetraethyl pyrophosphate	CCOP(=O)(OCC)OP(=O)(OCC)OCC	1	3	3	2	Moderate	4.24837	In	10	0	1
1570	Tetrasul	C1=CC(=CC=C1SC2=CC(=C(C=C2Cl)Cl)Cl)Cl	1	3	3	2	Moderate	4.24837	In	10	0	1
1573	Thiabendazole	C1=CC=C2C(=C1)NC(=N2)C3=CSC=N3	1	3	3	2	Moderate	4.24837	In	10	0	1
1579	Thicyofen	CCS(=O)C1=C(C(=C(S1)C#N)Cl)C#N	1	3	3	2	Moderate	4.24837	In	10	0	1
1588	Thiocyclam oxalate	CN(C)C1CSSSC1	1	3	3	2	Moderate	4.24837	In	10	0	1
1597	Thiosultap	CN(C)C(CSS(=O)(=O)O)CSS(=O)(=O)O	1	3	3	2	Moderate	4.24837	In	10	0	1
1598	Thiourea	C(=S)(N)N	1	3	3	2	Moderate	4.24837	In	10	0	1
1602	Tiaojiean	C[N+]1(CCOCC1)C	1	3	3	2	Moderate	4.24837	In	10	0	1
1606	Tioxazafen	C1=CC=C(C=C1)C2=NOC(=N2)C3=CC=CS3	1	3	3	2	Moderate	4.24837	In	10	0	1
1608	Titanium dioxide	O=[Ti]=O	1	3	3	2	Moderate	4.24837	In	10	0	1
1613	Toluene 2,4-diisocyanate	CC1=C(C=C(C=C1)N=C=O)N=C=O	1	3	3	2	Moderate	4.24837	In	10	0	1
1614	Tolylfluanid	CC1=CC=C(C=C1)N(SC(F)(Cl)Cl)S(=O)(=O)N(C)C	1	3	3	2	Moderate	4.24837	In	10	0	1
1619	Tralopyril	C1=CC(=CC=C1C2=C(C(=C(N2)C(F)(F)F)Br)C#N)Cl	1	3	3	2	Moderate	4.24837	In	10	0	1
1623	Trans-propiconazole	CCC[C@@H]1CO[C@](O1)(CN2C=NC=N2)C3=C(C=C(C=C3)Cl)Cl	1	3	3	2	Moderate	4.24837	In	10	0	1
1624	Triacontanol	CCCCCCCCCCCCCCCCCCCCCCCCCCCCCCO	1	3	3	2	Moderate	4.24837	In	10	0	1
1626	Triadimenol	CC(C)(C)C(C(N1C=NC=N1)OC2=CC=C(C=C2)Cl)O	1	3	3	2	Moderate	4.24837	In	10	0	1
1629	Triamiphos	CN(C)P(=O)(N1C(=NC(=N1)C2=CC=CC=C2)N)N(C)C	1	3	3	2	Moderate	4.24837	In	10	0	1
1631	Triarathene	C1=CC=C(C=C1)C2=C(SC(=C2)C3=CC=C(C=C3)Cl)C4=CC=CC=C4	1	3	3	2	Moderate	4.24837	In	10	0	1
1632	Triarimol	C1=CC=C(C=C1)C(C2=C(C=C(C=C2)Cl)Cl)(C3=CN=CN=C3)O	1	3	3	2	Moderate	4.24837	In	10	0	1
1635	Triaziflam	CC1=CC(=CC(=C1)OCC(C)NC2=NC(=NC(=N2)N)C(C)(C)F)C	1	3	3	2	Moderate	4.24837	In	10	0	1
1637	Triazoxide	C1=CC2=C(C=C1Cl)[N+](=NC(=N2)N3C=CN=C3)[O-]	1	3	3	2	Moderate	4.24837	In	10	0	1
1641	Tributyltin oxide	CCCC[Sn](CCCC)(CCCC)O[Sn](CCCC)(CCCC)CCCC	1	3	3	2	Moderate	4.24837	In	10	0	1
1644	Trichlorfon	COP(=O)(C(C(Cl)(Cl)Cl)O)OC	1	3	3	2	Moderate	4.24837	In	10	0	1
1650	Tricyclazole	CC1=C2C(=CC=C1)SC3=NN=CN23	1	3	3	2	Moderate	4.24837	In	10	0	1
1651	Tridemorph	CCCCCCCCCCCCCN1CC(OC(C1)C)C	1	3	3	2	Moderate	4.24837	In	10	0	1
1652	Tridiphane	C1C(O1)(CC(Cl)(Cl)Cl)C2=CC(=CC(=C2)Cl)Cl	1	3	3	2	Moderate	4.24837	In	10	0	1
1653	Trietazine	CCNC1=NC(=NC(=N1)Cl)N(CC)CC	1	3	3	2	Moderate	4.24837	In	10	0	1
1654	Trifenmorph	C1COCCN1C(C2=CC=CC=C2)(C3=CC=CC=C3)C4=CC=CC=C4	1	3	3	2	Moderate	4.24837	In	10	0	1
1663	Trifluralin	CCCN(CCC)C1=C(C=C(C=C1[N+](=O)[O-])C(F)(F)F)[N+](=O)[O-]	1	3	3	2	Moderate	4.24837	In	10	0	1
1667	Triforine	C1CN(CCN1C(C(Cl)(Cl)Cl)NC=O)C(C(Cl)(Cl)Cl)NC=O	1	3	3	2	Moderate	4.24837	In	10	0	1
1668	Triisopropanolamine	CC(CN(CC(C)O)CC(C)O)O	1	3	3	2	Moderate	4.24837	In	10	0	1
1671	Trioxymethylene	C1OCOCO1	1	3	3	2	Moderate	4.24837	In	10	0	1
1677	Umifoxolaner	C1C=NO[C@@]1(c1cc(c(c(c1)Cl)F)C(F)(F)F)CF	1	3	3	2	Moderate	4.24837	In	10	0	1
1682	Verbutin	CC#CCOC(C)C1=CC(=C(C=C1)OC)OC	1	3	3	2	Moderate	4.24837	In	10	0	1
1689	Xylene	CC1=CC=CC=C1C	1	3	3	2	Moderate	4.24837	In	10	0	1
274	Butyl stearate	CCCCCCCCCCCCCCCCCC(=O)OCCCC	1	3	3	2	Moderate	4.24762	In	10	0.000703	0.998658
707	Etoxazole	CCOC1=C(C=CC(=C1)C(C)(C)C)C2COC(=N2)C3=C(C=CC=C3F)F	1	3	3	2	Moderate	4.24555	In	10	0.00267163	0.994898
399	Climbazole	CC(C)(C)C(=O)C(N1C=CN=C1)OC2=CC=C(C=C2)Cl	1	3	3	2	Moderate	4.23856	In	10	0.00929858	0.982242
225	Bixlozone	CC1(CON(C1=O)CC2=C(C=C(C=C2)Cl)Cl)C	1	3	3	2	Moderate	4.23779	In	10	0.0100309	0.980843
1452	Quinacetol	CC(=O)C1=C2C=CC=NC2=C(C=C1)O	1	3	3	2	Moderate	4.23758	In	10	0.0102265	0.98047
772	Fenuron-TCA	C[NH+](C)C(=O)NC1=CC=CC=C1	1	3	3	2	Moderate	4.23686	In	10	0.0109083	0.979168
1292	Pencycuron	C1CCC(C1)N(CC2=CC=C(C=C2)Cl)C(=O)NC3=CC=CC=C3	1	3	3	2	Moderate	4.23561	In	10	0.0121014	0.976889
991	Indazapyroxamet	CC1(CC1)NC(=O)C2=CC=CC3=NN(C=C32)C4=CN=CC=C4	1	3	3	2	Moderate	4.23492	In	10	0.0127504	0.97565
729	Fenhexamid	CC1(CCCCC1)C(=O)NC2=C(C(=C(C=C2)O)Cl)Cl	1	3	3	2	Moderate	4.23473	In	10	0.0129322	0.975303
1037	Isopropyl myristate	CCCCCCCCCCCCCC(=O)OC(C)C	1	3	3	2	Moderate	4.23276	In	10	0.0148004	0.971735
1666	Trifopsime	CC(C(=O)ON=C(C)C)OC1=CC=C(C=C1)OC2=CC=C(C=C2)C(F)(F)F	1	3	3	2	Moderate	4.23103	In	10	0.0164386	0.968606
1372	Propanil	CCC(=O)NC1=CC(=C(C=C1)Cl)Cl	1	3	3	2	Moderate	4.22975	In	10	0.0176544	0.966284
1575	Thiamethoxam	CN1COCN(C1=N[N+](=O)[O-])CC2=CN=C(S2)Cl	1	3	3	2	Moderate	4.22859	In	10	0.143418	0.721053
701	Ethylene urea	C1CNC(=O)N1	1	3	3	2	Moderate	4.2284	In	10	0.0189381	0.963833
1453	Quinacetol sulphate	CC(=O)C1=C2C=CC=NC2=C(C=C1)O.CC(=O)C1=C2C=CC=NC2=C(C=C1)O.OS(=O)(=O)O	1	3	3	2	Moderate	4.2268	In	10	0.0204531	0.96094
1688	Xylachlor	CC1=C(C(=CC=C1)N(C(C)C)C(=O)CCl)C	1	3	3	2	Moderate	4.22655	In	10	0.020693	0.960481
874	Fluthiacet-methyl	COC(=O)CSC1=C(C=C(C(=C1)N=C2N3CCCCN3C(=O)S2)F)Cl	1	3	3	2	Moderate	4.22525	In	10	0.0219261	0.958126
1369	Propachlor	CC(C)N(C1=CC=CC=C1)C(=O)CCl	1	3	3	2	Moderate	4.22156	In	10	0.0254275	0.95144
1106	Mebenil	CC1=CC=CC=C1C(=O)NC2=CC=CC=C2	1	3	3	2	Moderate	4.22013	In	10	0.0267784	0.94886
1605	Tiorantraniliprole	CC(C)NC(=S)C1=C(C(=CC(=C1)Cl)Cl)NC(=O)C2=CC(=NN2C3=C(C=CC=N3)Cl)Br	1	3	3	2	Moderate	4.21838	In	10	0.0284458	0.945675
169	Benodanil	C1=CC=C(C=C1)NC(=O)C2=CC=CC=C2I	1	3	3	2	Moderate	4.2169	In	10	0.0298464	0.943001
870	Flurtamone	CNC1=C(C(=O)C(O1)C2=CC=CC=C2)C3=CC(=CC=C3)C(F)(F)F	1	3	3	2	Moderate	4.21662	In	10	0.0301096	0.942498
1030	Isomalathion	CCOC(=O)CC(C(=O)OCC)SP(=O)(OC)SC	1	3	3	2	Moderate	4.21426	In	26	0.0502343	0.94754
307	Carpropamid	CCC1(C(C1(Cl)Cl)C)C(=O)NC(C)C2=CC=C(C=C2)Cl	1	3	3	2	Moderate	4.21241	In	10	0.0341074	0.934863
911	Furmecyclox	CC1=CC(=C(O1)C)C(=O)N(C2CCCCC2)OC	1	3	3	2	Moderate	4.21193	In	10	0.034562	0.933995
1325	Picarbutrazox	CC(C)(C)OC(=O)NC1=CC=CC(=N1)CON=C(C2=CC=CC=C2)C3=NN=NN3C	1	3	3	2	Moderate	4.21178	In	10	0.034706	0.93372
1625	Triadimefon	CC(C)(C)C(=O)C(N1C=NC=N1)OC2=CC=C(C=C2)Cl	1	3	3	2	Moderate	4.21161	In	10	0.034865	0.933416
599	Dimoxystrobin	CC1=CC(=C(C=C1)C)OCC2=CC=CC=C2C(=NOC)C(=O)NC	1	3	3	2	Moderate	4.21091	In	10	0.0355277	0.932151
1186	Metolachlor	CCC1=CC=CC(=C1N(C(C)COC)C(=O)CCl)C	1	3	3	2	Moderate	4.21052	In	10	0.0359002	0.931439
1495	S-metolachlor	CCC1=CC=CC(=C1N(C(C)COC)C(=O)CCl)C	1	3	3	2	Moderate	4.21052	In	10	0.0359002	0.931439
1484	Siduron	CC1CCCCC1NC(=O)NC2=CC=CC=C2	1	3	3	2	Moderate	4.21041	In	10	0.0360012	0.931246
1194	Metsulfovax	CC1=C(SC(=N1)C)C(=O)NC2=CC=CC=C2	1	3	3	2	Moderate	4.21015	In	10	0.0362474	0.930776
584	Dimethachlor	CC1=C(C(=CC=C1)C)N(CCOC)C(=O)CCl	1	3	3	2	Moderate	4.20688	In	10	0.039347	0.924857
1278	Oxpoconazole	CC1(COC(N1C(=O)N2C=CN=C2)(C)CCCC3=CC=C(C=C3)Cl)C	1	3	3	2	Moderate	4.20404	In	10	0.0420452	0.919704
1279	Oxpoconazole fumarate	CC1(C)COC(C)(CCCC2=CC=C(Cl)C=C2)N1C(=O)N1C=CN=C1	1	3	3	2	Moderate	4.20404	In	10	0.0420452	0.919704
1039	Isoproturon	CC(C)C1=CC=C(C=C1)NC(=O)N(C)C	1	3	3	2	Moderate	4.20336	In	10	0.0426875	0.918477
1049	Isoxadifen ethyl	CCOC(=O)C1=NOC(C1)(C2=CC=CC=C2)C3=CC=CC=C3	1	3	3	2	Moderate	4.20276	In	10	0.043257	0.917389
1131	Mepronil	CC1=CC=CC=C1C(=O)NC2=CC(=CC=C2)OC(C)C	1	3	3	2	Moderate	4.20236	In	10	0.0436344	0.916669
257	Butachlor	CCCCOCN(C1=C(C=CC=C1CC)CC)C(=O)CCl	1	3	3	2	Moderate	4.20195	In	10	0.0440252	0.915922
771	Fenuron	CN(C)C(=O)NC1=CC=CC=C1	1	3	3	2	Moderate	4.20093	In	10	0.0449968	0.914067
1178	Methyldymron	CC(C)(C1=CC=CC=C1)NC(=O)N(C)C2=CC=CC=C2	1	3	3	2	Moderate	4.19647	In	10	0.0492188	0.906004
1156	Methfuroxam	CC1=C(OC(=C1C(=O)NC2=CC=CC=C2)C)C	1	3	3	2	Moderate	4.19567	In	10	0.0499775	0.904555
249	Bromuron	CN(C)C(=O)NC1=CC=C(C=C1)Br	1	3	3	2	Moderate	4.19538	In	10	0.0502531	0.904029
1440	Pyriminobac-methyl	CC(=NOC)C1=C(C(=CC=C1)OC2=NC(=CC(=N2)OC)OC)C(=O)OC	1	3	3	2	Moderate	4.1939	In	10	0.051661	0.90134
1556	Terbuchlor	CCCCOCN(C1=C(C=CC=C1C(C)(C)C)C)C(=O)CCl	1	3	3	2	Moderate	4.19364	In	10	0.0519035	0.900877
1145	Metazachlor	CC1=C(C(=CC=C1)C)N(CN2C=CC=N2)C(=O)CCl	1	3	3	2	Moderate	4.19229	In	10	0.0531907	0.898419
64	Acetochlor	CCC1=CC=CC(=C1N(COCC)C(=O)CCl)C	1	3	3	2	Moderate	4.19211	In	10	0.0533611	0.898093
79	Alachlor	CCC1=C(C(=CC=C1)CC)N(COC)C(=O)CCl	1	3	3	2	Moderate	4.19211	In	10	0.0533611	0.898093
1382	Propisochlor	CCC1=CC=CC(=C1N(COC(C)C)C(=O)CCl)C	1	3	3	2	Moderate	4.19099	In	10	0.0544217	0.896068
499	Delachlor	CC1=C(C(=CC=C1)C)N(COCC(C)C)C(=O)CCl	1	3	3	2	Moderate	4.18959	In	10	0.055745	0.89354
1233	Neburon	CCCCN(C)C(=O)NC1=CC(=C(C=C1)Cl)Cl	1	3	3	2	Moderate	4.1872	In	10	0.0580114	0.889212
1164	Methomyl	CC(=NOC(=O)NC)SC	1	3	3	2	Moderate	4.18715	In	10	0.117276	0.762312
728	Fenfuram	CC1=C(C=CO1)C(=O)NC2=CC=CC=C2	1	3	3	2	Moderate	4.18545	In	10	0.0596738	0.886037
1212	Monuron	CN(C)C(=O)NC1=CC=C(C=C1)Cl	1	3	3	2	Moderate	4.1834	In	10	0.0616159	0.882328
1348	Pretilachlor	CCCN(CCOC1=C(C=C(C=C1Cl)Cl)Cl)C(=O)N2C=CN=C2	1	3	3	2	Moderate	4.18298	In	10	0.0620221	0.881553
1151	Methabenzthiazuron	CNC(=O)N(C)C1=NC2=CC=CC=C2S1	1	3	3	2	Moderate	4.1801	In	10	0.0647469	0.876349
1413	Pyraoxystrobin	CN1C(=CC(=N1)C2=CC=C(C=C2)Cl)OCC3=CC=CC=C3C(=COC)C(=O)OC	1	3	3	2	Moderate	4.17885	In	10	0.0659357	0.874079
971	Imazamethabenz-methyl	COC(=O)c1ccc(C)cc1C1=NC(C)(C(C)C)C(=O)N1	1	3	3	2	Moderate	4.17857	In	10	0.0661995	0.873575
990	Indanofan	CCC1(C(=O)C2=CC=CC=C2C1=O)CC3(CO3)C4=CC(=CC=C4)Cl	1	3	3	2	Moderate	4.17849	In	10	0.0662809	0.873419
367	Chlorotoluron	CC1=C(C=C(C=C1)NC(=O)N(C)C)Cl	1	3	3	2	Moderate	4.17845	In	10	0.0663136	0.873357
1229	Naproanilide	CC(C(=O)NC1=CC=CC=C1)OC2=CC3=CC=CC=C3C=C2	1	3	3	2	Moderate	4.17623	In	10	0.0684199	0.869334
543	Dichlorvos	COP(=O)(OC)OC=C(Cl)Cl	1	3	3	2	Moderate	4.17622	In	10	0.0684327	0.86931
570	Difenoxuron	CN(C)C(=O)NC1=CC=C(C=C1)OC2=CC=C(C=C2)OC	1	3	3	2	Moderate	4.17602	In	10	0.0686229	0.868947
368	Chloroxuron	CN(C)C(=O)NC1=CC=C(C=C1)OC2=CC=C(C=C2)Cl	1	3	3	2	Moderate	4.17504	In	10	0.069552	0.867172
1087	Mandestrobin	CC1=CC(=C(C=C1)C)OCC2=CC=CC=C2C(C(=O)NC)OC	1	3	3	2	Moderate	4.17317	In	10	0.071326	0.863785
741	Fenothiocarb	CN(C)C(=O)SCCCCOC1=CC=CC=C1	1	3	3	2	Moderate	4.16798	In	10	0.107915	0.783047
1399	Prynachlor	CC(C#C)N(C1=CC=CC=C1)C(=O)CCl	1	3	3	2	Moderate	4.16783	In	10	0.0763898	0.854114
1188	Metominostrobin	CNC(=O)C(=NOC)C1=CC=CC=C1OC2=CC=CC=C2	1	3	3	2	Moderate	4.1675	In	10	0.0767019	0.853518
1544	Tebuthiuron	CC(C)(C)C1=NN=C(S1)N(C)C(=O)NC	1	3	3	2	Moderate	4.16715	In	10	0.0770365	0.852879
1006	Ioxynil octanoate	CCCCCCCC(=O)OC1=C(C=C(C=C1I)C#N)I	1	3	3	2	Moderate	4.16532	In	10	0.0787679	0.849572
50	2-methoxyethylmercury acetate	CC(=O)O[Hg]CCOC	1	3	3	2	Moderate	4.16495	In	10	0.079122	0.848896
335	Chloreturon	CCOC1=C(C=C(C=C1)NC(=O)N(C)C)Cl	1	3	3	2	Moderate	4.1646	In	10	0.079454	0.848262
1191	Metoxuron	CN(C)C(=O)NC1=CC(=C(C=C1)OC)Cl	1	3	3	2	Moderate	4.163	In	10	0.0809664	0.845374
497	Defenuron	CNC(=O)NC1=CC=CC=C1	1	3	3	2	Moderate	4.16299	In	10	0.0809791	0.845349
1051	Isoxapyrifop	CC(C(=O)N1CCCO1)OC2=CC=C(C=C2)OC3=C(C=C(C=N3)Cl)Cl	1	3	3	2	Moderate	4.1625	In	10	0.081444	0.844462
1192	Metrafenone	CC1=CC(=C(C(=C1C(=O)C2=C(C=CC(=C2C)Br)OC)OC)OC)OC	1	3	3	2	Moderate	4.1609	In	10	0.0829665	0.841554
1540	Tebufenpyrad	CCC1=NN(C(=C1Cl)C(=O)NCC2=CC=C(C=C2)C(C)(C)C)C	1	3	3	2	Moderate	4.16035	In	10	0.0834797	0.840574
1310	Phenylmercuric acetate	CC(=O)O[Hg]C1=CC=CC=C1	1	3	3	2	Moderate	4.16006	In	10	0.0837619	0.840035
638	Diuron	CN(C)C(=O)NC1=CC(=C(C=C1)Cl)Cl	1	3	3	2	Moderate	4.15987	In	10	0.0839376	0.839699
488	Daimuron	CC1=CC=C(C=C1)NC(=O)NC(C)(C)C2=CC=CC=C2	1	3	3	2	Moderate	4.1596	In	10	0.0841963	0.839205
1676	Tyclopyrazoflor	CCN(C1=CN(N=C1Cl)C2=CN=CC=C2)C(=O)CCSCCC(F)(F)F	1	3	3	2	Moderate	4.15838	In	10	0.0853556	0.836991
77	AD-67	C1CCC2(CC1)N(CCO2)C(=O)C(Cl)Cl	1	3	3	2	Moderate	4.15761	In	10	0.0860798	0.835608
1600	Tiadinil	CC1=C(C=C(C=C1)NC(=O)C2=C(N=NS2)C)Cl	1	3	3	2	Moderate	4.15749	In	10	0.0861986	0.835382
557	Dicyclonon	CC1(CN2C(=O)CCC2(N(C1)C(=O)C(Cl)Cl)C)C	1	3	3	2	Moderate	4.15735	In	10	0.0863279	0.835134
177	Bentaluron	CC(C)NC(=O)NC1=NC2=CC=CC=C2S1	1	3	3	2	Moderate	4.15614	In	10	0.0874726	0.832948
44	24-epibrassinolide	CC(C)C(C)C(C(C(C)C1CCC2C1(CCC3C2COC(=O)C4C3(CC(C(C4)O)O)C)C)O)O	1	3	3	2	Moderate	4.156	In	10	0.0876129	0.83268
966	Icaridin	CCC(C)OC(=O)N1CCCCC1CCO	1	3	3	2	Moderate	4.15552	In	10	0.088062	0.831823
439	Cumyluron	CC(C)(C1=CC=CC=C1)NC(=O)NCC2=CC=CC=C2Cl	1	3	3	2	Moderate	4.15403	In	10	0.0894737	0.829127
1044	Isouron	CC(C)(C)C1=CC(=NO1)NC(=O)N(C)C	1	3	3	2	Moderate	4.15403	In	10	0.0894788	0.829117
767	Fentin acetate	CC(=O)O[Sn](C1=CC=CC=C1)(C2=CC=CC=C2)C3=CC=CC=C3	1	3	3	2	Moderate	4.15147	In	4	0.0916215	0.784173
172	Benquinox	C1=CC=C(C=C1)C(=O)NNC2=CC=C(C=C2)N=O	1	3	3	2	Moderate	4.14981	In	4	0.0900684	0.787053
264	Buthidazole	CC(C)(C)C1=NN=C(S1)N2C(CN(C2=O)C)O	1	3	3	2	Moderate	4.14419	In	4	0.0848246	0.796933
273	Buturon	CC(C#C)N(C)C(=O)NC1=CC=C(C=C1)Cl	1	3	3	2	Moderate	4.14365	In	4	0.0843267	0.797884
245	Bromoxynil-octanoate	CCCCCCCC(=O)OC1=C(C=C(C=C1Br)C#N)Br	1	3	3	2	Moderate	4.14359	In	4	0.0842648	0.798002
67	Acibenzolar	C1=CC(=C2C(=C1)N=NS2)C(=O)S	1	3	3	2	Moderate	4.1432	In	4	0.0839087	0.798684
1019	Isobornyl thiocyanoacetate	CC1(C2CCC1(C(C2)OC(=O)CSC#N)C)C	1	3	3	2	Moderate	4.14299	In	4	0.0837132	0.799059
411	Clomeprop	CC1=C(C=CC(=C1Cl)OC(C)C(=O)NC2=CC=CC=C2)Cl	1	3	3	2	Moderate	4.14249	In	4	0.0832456	0.799957
198	Benzthiazuron	CNC(=O)NC1=NC2=CC=CC=C2S1	1	3	3	2	Moderate	4.14217	In	4	0.0829426	0.800539
348	Chlorfluren methyl	COC(=O)C1C2=CC=CC=C2C3=C1C=C(C=C3)Cl	1	3	3	2	Moderate	4.14193	In	4	0.0827231	0.800962
905	Furametpyr	CC1C2=C(C=CC=C2NC(=O)C3=C(N(N=C3C)C)Cl)C(O1)(C)C	1	3	3	2	Moderate	4.13692	In	4	0.0780451	0.81008
697	Ethylchlozate	CCOC(=O)CC1=C2C=C(C=CC2=NN1)Cl	1	3	3	2	Moderate	4.13177	In	4	0.0732479	0.819649
150	Azoluron	CCn1nccc1NC(=O)Nc2ccccc2	1	3	3	2	Moderate	4.13112	In	4	0.0726425	0.820872
1088	Mandipropamid	COC1=C(C=CC(=C1)CCNC(=O)C(C2=CC=C(C=C2)Cl)OCC#C)OCC#C	1	3	3	2	Moderate	4.12997	In	4	0.0715666	0.823056
989	Inabenfide	C1=CC=C(C=C1)C(C2=C(C=CC(=C2)Cl)NC(=O)C3=CC=NC=C3)O	1	3	3	2	Moderate	4.12906	In	4	0.0707185	0.824785
1269	Oxadiazon	CC(C)OC1=C(C=C(C(=C1)N2C(=O)OC(=N2)C(C)(C)C)Cl)Cl	1	3	3	2	Moderate	4.12836	In	4	0.0700686	0.826116
956	Hexazinone	CN1C(=NC(=O)N(C1=O)C2CCCCC2)N(C)C	1	3	3	2	Moderate	4.12712	In	4	0.068903	0.828512
244	Bromoxynil-butanoate	CCCC(=O)OC1=C(C=C(C=C1Br)C#N)Br	1	3	3	2	Moderate	4.12602	In	4	0.0678782	0.830631
199	Benzyl benzoate	C1=CC=C(C=C1)COC(=O)C2=CC=CC=C2	1	3	3	2	Moderate	4.12436	In	4	0.0663308	0.83385
1109	Mecarphon	CN(C(=O)CSP(=S)(C)OC)C(=O)OC	1	3	3	2	Moderate	4.12378	In	26	0.104878	0.894426
928	Guadipyr	CCCCC=NN(CC1=CN=C(C=C1)Cl)C(=N[N+](=O)[O-])N	1	3	3	2	Moderate	4.12366	In	4	0.0656774	0.835217
27	1-naphthylacetamide	C1=CC=C2C(=C1)C=CC=C2CC(=O)N	1	3	3	2	Moderate	4.12312	In	4	0.0651763	0.836269
546	Diclocymet	CC(C1=C(C=C(C=C1)Cl)Cl)NC(=O)C(C#N)C(C)(C)C	1	3	3	2	Moderate	4.12199	In	4	0.0641199	0.838494
286	Calvinphos	COP([O-])(=O)OC=C(Cl)Cl	1	3	3	2	Moderate	4.11983	In	4	0.0621119	0.842756
1388	Propyzamide	CC(C)(C#C)NC(=O)C1=CC(=CC(=C1)Cl)Cl	1	3	3	2	Moderate	4.11952	In	4	0.0618232	0.843373
1581	Thidiazuron	C1=CC=C(C=C1)NC(=O)NC2=CN=NS2	1	3	3	2	Moderate	4.11948	In	4	0.061786	0.843452
226	Boscalid	C1=CC=C(C(=C1)C2=CC=C(C=C2)Cl)NC(=O)C3=C(N=CC=C3)Cl	1	3	3	2	Moderate	4.11839	In	4	0.0607668	0.845636
1371	Propamocarb	CCCOC(=O)NCCCN(C)C	1	3	3	2	Moderate	4.11683	In	4	0.0593116	0.848774
552	Diclosulam	CCOC1=NC(=CC2=NC(=NN21)S(=O)(=O)NC3=C(C=CC=C3Cl)Cl)F	1	3	3	2	Moderate	4.11647	In	10	0.096225	0.844761
787	Florasulam	COC1=NC=C(C2=NC(=NN21)S(=O)(=O)NC3=C(C=CC=C3F)F)F	1	3	3	2	Moderate	4.11647	In	10	0.096225	0.844761
1189	Metosulam	CC1=C(C(=C(C=C1)Cl)NS(=O)(=O)C2=NN3C(=CC(=NC3=N2)OC)OC)Cl	1	3	3	2	Moderate	4.11647	In	10	0.096225	0.844761
1275	Oxazosulfyl	CCS(=O)(=O)C1=C(N=CC=C1)C2=NC3=C(O2)C=CC(=C3)S(=O)(=O)C(F)(F)F	1	3	3	2	Moderate	4.11647	In	10	0.096225	0.844761
1184	Metobromuron	CN(C(=O)NC1=CC=C(C=C1)Br)OC	1	3	3	2	Moderate	4.11452	In	4	0.0571575	0.853461
171	Benoxacor	CC1COC2=CC=CC=C2N1C(=O)C(Cl)Cl	1	3	3	2	Moderate	4.11323	In	4	0.0559512	0.856109
861	Fluquinconazole	C1=CC2=C(C=C1F)C(=O)N(C(=N2)N3C=NC=N3)C4=C(C=C(C=C4)Cl)Cl	1	3	3	2	Moderate	4.11262	In	4	0.0553812	0.857365
1112	Mecoprop etexyl	CCCCC(CC)COC(=O)C(C)OC1=C(C=C(C=C1)Cl)C	1	3	3	2	Moderate	4.11232	In	4	0.0551002	0.857986
1115	Mecoprop-P etexyl	CCCCC(CC)COC(=O)C(C)OC1=C(C=C(C=C1)Cl)C	1	3	3	2	Moderate	4.11232	In	4	0.0551002	0.857986
1354	Procymidone	CC12CC1(C(=O)N(C2=O)C3=CC(=CC(=C3)Cl)Cl)C	1	3	3	2	Moderate	4.11127	In	4	0.05412	0.860159
751	Fenpropathrin	CC1(C(C1(C)C)C(=O)OC(C#N)C2=CC(=CC=C2)OC3=CC=CC=C3)C	1	3	3	2	Moderate	4.11097	In	4	0.0538459	0.860769
1424	Pyribambenz-propyl	CCCOC(=O)C1=CC=C(C=C1)NCC2=CC=CC=C2OC3=NC(=CC(=N3)OC)OC	1	3	3	2	Moderate	4.11094	In	4	0.0538207	0.860825
1437	Pyriftalid	CC1C2=C(C(=CC=C2)SC3=NC(=CC(=N3)OC)OC)C(=O)O1	1	3	3	2	Moderate	4.11078	In	4	0.053671	0.861158
482	Cyprofuram	C1CC1C(=O)N(C2CCOC2=O)C3=CC(=CC=C3)Cl	1	3	3	2	Moderate	4.11064	In	4	0.0535336	0.861465
1444	Pyriofenone	CC1=CC(=C(C(=C1C(=O)C2=C(C(=CN=C2OC)Cl)C)OC)OC)OC	1	3	3	2	Moderate	4.11046	In	4	0.0533701	0.861829
1096	MCPA-etexyl	CCCCC(CC)COC(=O)COC1=C(C=C(C=C1)Cl)C	1	3	3	2	Moderate	4.11032	In	4	0.053238	0.862124
1197	Metyltetraprole	CC1=C(C(=CC=C1)N2C(=O)N(N=N2)C)COC3=NN(C=C3)C4=CC=C(C=C4)Cl	1	3	3	2	Moderate	4.11015	In	4	0.0530771	0.862484
886	Forchlorfenuron	C1=CC=C(C=C1)NC(=O)NC2=CC(=NC=C2)Cl	1	3	3	2	Moderate	4.10999	In	4	0.0529282	0.862816
1099	MCPA-isoctyl	CC1=C(C=CC(=C1)Cl)OCC(=O)OCCCCCC(C)C	1	3	3	2	Moderate	4.10789	In	4	0.0509703	0.867217
1107	Mecarbam	CCOC(=O)N(C)C(=O)CSP(=S)(OCC)OCC	1	3	3	2	Moderate	4.10737	In	26	0.107427	0.878495
965	Hyquincarb	CC1=NC2=C(CCCC2)C(=C1)OC(=O)N(C)C	1	3	3	2	Moderate	4.10596	In	4	0.0491691	0.871306
61	Acetamide	CC(=O)N	1	3	3	2	Moderate	4.10461	In	4	0.0479127	0.87418
1414	Pyrapropoyne	CC(C)ON=C(CNC(=O)C1=CN(N=C1C(F)F)C)C2=C(C=C(C=C2)C#CC3CC3)Cl	1	3	3	2	Moderate	4.10458	In	4	0.0478863	0.874241
1208	Monolinuron	CN(C(=O)NC1=CC=C(C=C1)Cl)OC	1	3	3	2	Moderate	4.10254	In	4	0.0459844	0.87863
1433	Pyridate	CCCCCCCCSC(=O)OC1=CC(=NN=C1C2=CC=CC=C2)Cl	1	3	3	2	Moderate	4.10254	In	4	0.0459783	0.878644
1434	Pyridinitril	CCCCCCCCSC(=O)OC1=CC(=NN=C1C2=CC=CC=C2)Cl	1	3	3	2	Moderate	4.10254	In	4	0.0459783	0.878644
845	Fluothiuron	CN(C)C(=O)NC1=CC(=C(C=C1)SC(F)(F)Cl)Cl	1	3	3	2	Moderate	4.10227	In	4	0.0457314	0.879217
1423	Pyribambenz-isopropyl	CC(C)OC(=O)C1=CC=C(C=C1)NCC2=CC=CC=C2OC3=NC(=CC(=N3)OC)OC	1	3	3	2	Moderate	4.10222	In	4	0.045683	0.879329
1093	MCPA-butyl	CCCCOC(=O)COC1=C(C=C(C=C1)Cl)C	1	3	3	2	Moderate	4.10173	In	4	0.0452312	0.88038
1027	Isofetamid	CC1=C(SC=C1)C(=O)NC(C)(C)C(=O)C2=C(C=C(C=C2)OC(C)C)C	1	3	3	2	Moderate	4.10138	In	4	0.0449036	0.881143
1268	Oxadiargyl	CC(C)(C)C1=NN(C(=O)O1)C2=CC(=C(C=C2Cl)Cl)OCC#C	1	3	3	2	Moderate	4.10128	In	4	0.0448056	0.881372
1333	Piperalin	CC1CCCCN1CCCOC(=O)C2=CC(=C(C=C2)Cl)Cl	1	3	3	2	Moderate	4.09872	In	4	0.0424228	0.886968
1236	Nicofluprole	CN(C1CC1)C(=O)C2=C(N=CC(=C2)C3=CN(N=C3)C4=C(C=C(C=C4Cl)C(C(F)(F)F)(C(F)(F)F)F)Cl)Cl	1	3	3	2	Moderate	4.0986	In	4	0.0423093	0.887236
1116	Mecoprop-P isobutyl	CC1=C(C=CC(=C1)Cl)OC(C)C(=O)OCC(C)C	1	3	3	2	Moderate	4.09784	In	4	0.0416	0.888916
756	Fenpyroximate	CC1=NN(C(=C1C=NOCC2=CC=C(C=C2)C(=O)OC(C)(C)C)OC3=CC=CC=C3)C	1	3	3	2	Moderate	4.09702	In	4	0.0408318	0.890743
1098	MCPA-isobutyl	CC1=C(C=CC(=C1)Cl)OCC(=O)OCC(C)C	1	3	3	2	Moderate	4.09584	In	4	0.0397378	0.893359
910	Furilazole	CC1(N(CC(O1)C2=CC=CO2)C(=O)C(Cl)Cl)C	1	3	3	2	Moderate	4.09558	In	4	0.0394918	0.893949
400	Cliodinate	CC(=O)OC1=C(C(=NC=C1I)Cl)I	1	3	3	2	Moderate	4.09187	In	4	0.0360315	0.902333
1183	Metobenzuron	CC1(CC(OC2=C1C=CC(=C2)OC3=CC=C(C=C3)NC(=O)N(C)OC)(C)OC)C	1	3	3	2	Moderate	4.09136	In	4	0.035552	0.903508
1691	Zarilamid	CCOC(C#N)NC(=O)C1=CC=C(C=C1)Cl	1	3	3	2	Moderate	4.0913	In	4	0.0354982	0.90364
327	Chlorbromuron	CN(C(=O)NC1=CC(=C(C=C1)Br)Cl)OC	1	3	3	2	Moderate	4.09099	In	4	0.0352086	0.904351
416	Cloquintocet-mexyl	CCCCCC(C)OC(=O)COC1=C2C(=C(C=C1)Cl)C=CC=N2	1	3	3	2	Moderate	4.08985	In	4	0.0341436	0.906975
1097	MCPA-ethyl	CCOC(=O)COC1=C(C=C(C=C1)Cl)C	1	3	3	2	Moderate	4.08938	In	4	0.0337043	0.908062
409	Clofop-isobutyl	CC(C)COC(=O)C(C)OC1=CC=C(C=C1)OC2=CC=C(C=C2)Cl	1	3	3	2	Moderate	4.08871	In	4	0.0330864	0.909595
1100	MCPA-isopropyl	CC1=C(C=CC(=C1)Cl)OCC(=O)OC(C)C	1	3	3	2	Moderate	4.08838	In	4	0.0327732	0.910374
266	Buthiuron	CCCCS(=O)(=O)C1=NN=C(S1)N(C)C(=O)NC	1	3	3	2	Moderate	4.0881	In	4	0.0325148	0.911018
1046	Isoxaben	CCC(C)(CC)C1=NOC(=C1)NC(=O)C2=C(C=CC=C2OC)OC	1	3	3	2	Moderate	4.08732	In	4	0.0317863	0.912838
538	Dichlorprop-P-etexyl	CCCCC(CC)COC(=O)C(C)OC1=C(C=C(C=C1)Cl)Cl	1	3	3	2	Moderate	4.08703	In	4	0.0315126	0.913523
542	Dichlorprop-P-etexyl	CCCCC(CC)COC(=O)C(C)OC1=C(C=C(C=C1)Cl)Cl	1	3	3	2	Moderate	4.08703	In	4	0.0315126	0.913523
742	Fenoxanil	CC(C)C(C)(C#N)NC(=O)C(C)OC1=C(C=C(C=C1)Cl)Cl	1	3	3	2	Moderate	4.08615	In	4	0.0306938	0.91558
879	Fluxametamide	Cc1cc(ccc1C(=O)NC=NOC)C2=NOC(C2)(c3cc(cc(c3)Cl)Cl)C(F)(F)F	1	3	3	2	Moderate	4.08548	In	4	0.0300712	0.917151
679	Ethidimuron	CCS(=O)(=O)C1=NN=C(S1)N(C)C(=O)NC	1	3	3	2	Moderate	4.08528	In	4	0.0298855	0.91762
1142	Metamifop	CC(C(=O)N(C)C1=CC=CC=C1F)OC2=CC=C(C=C2)OC3=NC4=C(O3)C=C(C=C4)Cl	1	3	3	2	Moderate	4.08487	In	4	0.0295006	0.918595
302	Carbosulfan	CCCCN(CCCC)SN(C)C(=O)OC1=CC=CC2=C1OC(C2)(C)C	1	3	3	2	Moderate	4.08453	In	4	0.0291804	0.919407
649	Eglinazine-ethyl	CCNC1=NC(=NC(=N1)NCC(=O)OCC)Cl	1	3	3	2	Moderate	4.08426	In	4	0.0289317	0.920039
535	Dichlorprop-isoctyl	CCCCCCC(C)OC(=O)C(C)OC1=C(C=C(C=C1)Cl)Cl	1	3	3	2	Moderate	4.08425	In	4	0.0289216	0.920065
539	Dichlorprop-isoctyl	CCCCCCC(C)OC(=O)C(C)OC1=C(C=C(C=C1)Cl)Cl	1	3	3	2	Moderate	4.08425	In	4	0.0289216	0.920065
1362	Proglinazine-ethyl	CCOC(=O)CNC1=NC(=NC(=N1)Cl)NC(C)C	1	3	3	2	Moderate	4.08361	In	4	0.0283239	0.921587
1618	Tralomethrin	CC1(C(C1C(=O)OC(C#N)C2=CC(=CC=C2)OC3=CC=CC=C3)C(C(Br)(Br)Br)Br)C	1	3	3	2	Moderate	4.0835	In	4	0.0282224	0.921847
586	Dimethenamid	CC1=CSC(=C1N(C(C)COC)C(=O)CCl)C	1	3	3	2	Moderate	4.08086	In	10	0.101982	0.790265
587	Dimethenamid-P	CC1=CSC(=C1N(C(C)COC)C(=O)CCl)C	1	3	3	2	Moderate	4.08086	In	10	0.101982	0.790265
104	Amidochlor	CCC1=C(C(=CC=C1)CC)N(CNC(=O)C)C(=O)CCl	1	3	3	2	Moderate	4.08082	In	4	0.025722	0.928274
1284	Parafluron	CN(C)C(=O)NC1=CC=C(C=C1)C(F)(F)F	1	3	3	2	Moderate	4.08055	In	4	0.0254767	0.928909
1029	Isolan	CC1=NN(C(=C1)OC(=O)N(C)C)C(C)C	1	3	3	2	Moderate	4.07937	In	4	0.0243748	0.931774
153	Azoxystrobin	COC=C(C1=CC=CC=C1OC2=NC=NC(=C2)OC3=CC=CC=C3C#N)C(=O)OC	1	3	3	2	Moderate	4.07937	In	4	0.0243739	0.931777
1075	Linuron	CN(C(=O)NC1=CC(=C(C=C1)Cl)Cl)OC	1	3	3	2	Moderate	4.07901	In	4	0.0240355	0.93266
813	Fluenetil	C1=CC=C(C=C1)C2=CC=C(C=C2)CC(=O)OCCF	1	3	3	2	Moderate	4.0767	In	4	0.0218836	0.938317
1113	Mecoprop methyl	CC1=C(C=CC(=C1)Cl)OC(C)C(=O)OC	1	3	3	2	Moderate	4.0764	In	4	0.0216001	0.939067
252	Bucarpolate	CCCCOCCOCCOC(=O)C1=CC2=C(C=C1)OCO2	1	3	3	2	Moderate	4.0751	In	4	0.0203882	0.942289
1466	Quizalofop-ethyl	CCOC(=O)C(C)OC1=CC=C(C=C1)OC2=CN=C3C=C(C=CC3=N2)Cl	1	3	3	2	Moderate	4.07441	In	4	0.0197447	0.944009
1101	MCPA-methyl	CC1=C(C=CC(=C1)Cl)OCC(=O)OC	1	3	3	2	Moderate	4.0744	In	4	0.019738	0.944026
978	Imazaquin methyl	CC(C)C1(C(=O)NC(=N1)C2=NC3=CC=CC=C3C=C2C(=O)OC)C	1	3	3	2	Moderate	4.07425	In	4	0.0196	0.944396
1092	MCPA-butotyl	CCCCOCCOC(=O)COC1=C(C=C(C=C1)Cl)C	1	3	3	2	Moderate	4.07404	In	4	0.0193996	0.944933
1047	Isoxachlortole	CS(=O)(=O)C1=C(C=CC(=C1)Cl)C(=O)C2=C(ON=C2)C3CC3	1	3	3	2	Moderate	4.07276	In	4	0.0182079	0.948141
743	Fenoxaprop-ethyl	CCOC(=O)C(C)OC1=CC=C(C=C1)OC2=NC3=C(O2)C=C(C=C3)Cl	1	3	3	2	Moderate	4.07185	In	4	0.0173592	0.950438
745	Fenoxaprop-P-ethyl	CCOC(=O)C(C)OC1=CC=C(C=C1)OC2=NC3=C(O2)C=C(C=C3)Cl	1	3	3	2	Moderate	4.07185	In	4	0.0173592	0.950438
866	Flurochloridone	C1C(C(C(=O)N1C2=CC=CC(=C2)C(F)(F)F)Cl)CCl	1	3	3	2	Moderate	4.07132	In	4	0.0168669	0.951776
1620	Trans-flurochloridone	C1C(C(C(=O)N1C2=CC=CC(=C2)C(F)(F)F)Cl)CCl	1	3	3	2	Moderate	4.07132	In	4	0.0168669	0.951776
1607	Tirpate	CC1CSC(C)(/C(/[H])=N/OC(=NC)O)S1	1	3	3	2	Moderate	4.07103	In	4	0.0165892	0.952532
1571	Thenylchlor	CC1=C(C(=CC=C1)C)N(CC2=C(C=CS2)OC)C(=O)CCl	1	3	3	2	Moderate	4.07036	In	10	0.1057	0.774197
341	Chlorfenprop-methyl	COC(=O)C(CC1=CC=C(C=C1)Cl)Cl	1	3	3	2	Moderate	4.06932	In	4	0.0149956	0.956895
1124	Mefluidide	CC1=CC(=C(C=C1NC(=O)C)NS(=O)(=O)C(F)(F)F)C	1	3	3	2	Moderate	4.0693	In	4	0.0149826	0.956931
1378	Propham	CC(C)OC(=O)NC1=CC=CC=C1	1	3	3	2	Moderate	4.06915	In	4	0.0148404	0.957322
1120	Mefenacet	CN(C1=CC=CC=C1)C(=O)COC2=NC3=CC=CC=C3S2	1	3	3	2	Moderate	4.06874	In	10	0.106346	0.771714
467	Cyhalofop-butyl	CCCCOC(=O)C(C)OC1=CC=C(C=C1)OC2=C(C=C(C=C2)C#N)F	1	3	3	2	Moderate	4.06804	In	4	0.0138088	0.960171
583	Dimetachlone	C1CC(=O)N(C1=O)C2=CC(=CC(=C2)Cl)Cl	1	3	3	2	Moderate	4.06734	In	4	0.0131521	0.961993
1038	Isoprothiolane	CC(C)OC(=O)C(=C1SCCS1)C(=O)OC(C)C	1	3	3	2	Moderate	4.06719	In	4	0.0130155	0.962373
738	Fenoprop-isoctyl	CC(C)CCCCCOC(=O)C(C)OC1=CC(=C(C=C1Cl)Cl)Cl	1	3	3	2	Moderate	4.06707	In	4	0.0129033	0.962685
819	Flufenoxystrobin	COC=C(C1=CC=CC=C1COC2=C(C=C(C=C2)C(F)(F)F)Cl)C(=O)OC	1	3	3	2	Moderate	4.06651	In	4	0.0123745	0.96416
838	Fluoridamid	CC1=C(C=C(C=C1)NC(=O)C)NS(=O)(=O)C(F)(F)F	1	3	3	2	Moderate	4.06607	In	4	0.0119658	0.965302
830	Flumioxazin	C#CCN1C(=O)COC2=CC(=C(C=C21)N3C(=O)C4=C(C3=O)CCCC4)F	1	3	3	2	Moderate	4.0655	In	4	0.011439	0.966779
1541	Tebufloquin	CC1=C(C2=CC(=CC(=C2N=C1C)F)C(C)(C)C)OC(=O)C	1	3	3	2	Moderate	4.0653	In	4	0.0112538	0.967299
733	Fenobucarb	CCC(C)C1=CC=CC=C1OC(=O)NC	1	3	3	2	Moderate	4.06498	In	4	0.0109496	0.968155
726	Fenethacarb	CCC1=CC(=CC(=C1)OC(=O)NC)CC	1	3	3	2	Moderate	4.0648	In	4	0.0107832	0.968624
1555	Terbucarb	CC1=CC(=C(C(=C1)C(C)(C)C)OC(=O)NC)C(C)(C)C	1	3	3	2	Moderate	4.06462	In	4	0.0106144	0.9691
959	Hexythiazox	CC1C(SC(=O)N1C(=O)NC2CCCCC2)C3=CC=C(C=C3)Cl	1	3	3	2	Moderate	4.06433	In	4	0.0103425	0.969868
680	Ethiofencarb	CCSCC1=CC=CC=C1OC(=O)NC	1	3	3	2	Moderate	4.06426	In	4	0.0102775	0.970051
763	Fenthiaprop ethyl	COC(=O)C(C)OC1=CC=C(C=C1)OC2=NC3=C(S2)C=C(C=C3)Cl	1	3	3	2	Moderate	4.06406	In	4	0.0100967	0.970563
1410	Pyramat	CCCC1=CC(=NC(=N1)C)OC(=O)N(C)C	1	3	3	2	Moderate	4.0629	In	4	0.00901124	0.973644
253	Bufencarb	CCCC(C)C1=CC(OC(=O)NC)=CC=C1	1	3	3	2	Moderate	4.0628	In	4	0.00891669	0.973913
1035	Isoprocarb	CC(C)C1=CC=CC=C1OC(=O)NC	1	3	3	2	Moderate	4.06192	In	4	0.00809934	0.976248
747	Fenoxycarb	CCOC(=O)NCCOC1=CC=C(C=C1)OC2=CC=CC=C2	1	3	3	2	Moderate	4.06177	In	4	0.00795373	0.976665
737	Fenoprop-butyl	CCCCOC(=O)C(C)OC1=CC(=C(C=C1Cl)Cl)Cl	1	3	3	2	Moderate	4.06092	In	4	0.0071642	0.978932
1366	Promecarb	CC1=CC(=CC(=C1)OC(=O)NC)C(C)C	1	3	3	2	Moderate	4.06081	In	4	0.0070588	0.979236
548	Diclofop-methyl	CC(C(=O)OC)OC1=CC=C(C=C1)OC2=C(C=C(C=C2)Cl)Cl	1	3	3	2	Moderate	4.05999	In	4	0.00630145	0.981422
1669	Trimethacarb	CC1=CC(=CC(=C1C)C)OC(=O)NC	1	3	3	2	Moderate	4.05975	In	4	0.00607071	0.98209
453	Cycloheximide	CC1CC(C(=O)C(C1)C(CC2CC(=O)NC(=O)C2)O)C	1	3	3	2	Moderate	4.05969	In	4	0.00601411	0.982254
1043	Isotianil	C1=CC=C(C(=C1)C#N)NC(=O)C2=C(C(=NS2)Cl)Cl	1	3	3	2	Moderate	4.05953	In	4	0.00586473	0.982688
1105	M-cumenyl methylcarbamate	CC(C)C1=CC(=CC=C1)OC(=O)NC	1	3	3	2	Moderate	4.05905	In	4	0.00542008	0.983979
1687	XMC	CC1=CC(=CC(=C1)OC(=O)NC)C	1	3	3	2	Moderate	4.05869	In	4	0.00508261	0.984962
1690	Xylylcarb	CC1=C(C=C(C=C1)OC(=O)NC)C	1	3	3	2	Moderate	4.05799	In	4	0.00443199	0.986861
1187	Metolcarb	CC1=CC(=CC=C1)OC(=O)NC	1	3	3	2	Moderate	4.05693	In	4	0.00344389	0.989761
794	Fluazifop-butyl	CCCCOC(=O)C(C)OC1=CC=C(C=C1)OC2=NC=C(C=C2)C(F)(F)F	1	3	3	2	Moderate	4.05579	In	4	0.00237535	0.992915
796	Fluazifop-P-butyl	CCCCOC(=O)C(C)OC1=CC=C(C=C1)OC2=NC=C(C=C2)C(F)(F)F	1	3	3	2	Moderate	4.05579	In	4	0.00237535	0.992915
1199	Mexacarbate	CC1=CC(=CC(=C1N(C)C)C)OC(=O)NC	1	3	3	2	Moderate	4.05526	In	4	0.0018808	0.994382
1340	Pirimicarb	CC1=C(N=C(N=C1OC(=O)N(C)C)N(C)C)C	1	3	3	2	Moderate	4.05506	In	4	0.00169572	0.994932
1063	Kresoxim-methyl	CC1=CC=CC=C1OCC2=CC=CC=C2C(=NOC)C(=O)OC	1	3	3	2	Moderate	4.05437	In	4	0.0010511	0.996852
666	Esfenvalerate	CC(C)C(C1=CC=C(C=C1)Cl)C(=O)OC(C#N)C2=CC(=CC=C2)OC3=CC=CC=C3	1	3	3	2	Moderate	4.054	In	4	0.000708	0.997879
773	Fenvalerate	CC(C)C(C1=CC=C(C=C1)Cl)C(=O)OC(C#N)C2=CC(=CC=C2)OC3=CC=CC=C3	1	3	3	2	Moderate	4.054	In	4	0.000708	0.997879
108	Aminocarb	CC1=C(C=CC(=C1)OC(=O)NC)N(C)C	1	3	3	2	Moderate	4.0535	In	4	0.000242	0.999273
293	Carbaryl	CNC(=O)OC1=CC=CC2=CC=CC=C21	1	3	3	2	Moderate	4.05324	In	4	0	1
156	Beflubutamid	CCC(C(=O)NCC1=CC=CC=C1)OC2=CC(=C(C=C2)F)C(F)(F)F	1	3	3	2	Moderate	4.05239	In	4	0.000788	0.997632
1330	Picoxystrobin	COC=C(C1=CC=CC=C1COC2=CC=CC(=N2)C(F)(F)F)C(=O)OC	1	3	3	2	Moderate	4.05178	In	4	0.00136232	0.995908
536	Dichlorprop-methyl	CC(C(=O)OC)OC1=C(C=C(C=C1)Cl)Cl	1	3	3	2	Moderate	4.05111	In	4	0.00198746	0.99403
540	Dichlorprop-methyl	CC(C(=O)OC)OC1=C(C=C(C=C1)Cl)Cl	1	3	3	2	Moderate	4.05111	In	4	0.00198746	0.99403
1617	Tralocythrin	CC1(C(C1C(=O)OC(C#N)C2=CC(=CC=C2)OC3=CC=CC=C3)C(C(Cl)(Cl)Br)Br)C	1	3	3	2	Moderate	4.05089	In	4	0.00219325	0.993412
533	Dichlorprop-butotyl	CCCCOCCOC(=O)C(C)OC1=C(C=C(C=C1)Cl)Cl	1	3	3	2	Moderate	4.05074	In	4	0.00232581	0.993013
1294	Penflufen	CC1=NN(C(=C1C(=O)NC2=CC=CC=C2C(C)CC(C)C)F)C	1	3	3	2	Moderate	4.04962	In	4	0.00337283	0.989868
1245	N-methyl saccharine	CN1C(=O)C2=CC=CC=C2S1(=O)=O	1	3	3	2	Moderate	4.04894	In	4	0.00400483	0.98797
1656	Trifloxystrobin	CC(=NOCC1=CC=CC=C1C(=NOC)C(=O)OC)C2=CC(=CC=C2)C(F)(F)F	1	3	3	2	Moderate	4.04593	In	4	0.00681355	0.979532
376	Chlorpropham	CC(C)OC(=O)NC1=CC(=CC=C1)Cl	1	3	3	2	Moderate	4.04562	In	4	0.00710846	0.978646
849	Fluoxytioconazole	C1=CC(=CC=C1C#N)OC2=CN=C(C=C2)C(C(CN3C(=S)N=CN3)(C4=C(C=C(C=C4)F)F)O)(F)F	1	3	3	2	Moderate	4.04494	In	10	0.11774	0.735303
833	Fluometuron	CN(C)C(=O)NC1=CC=CC(=C1)C(F)(F)F	1	3	3	2	Moderate	4.04444	In	4	0.00820423	0.975355
1450	Pyroxasulfone	CC1(CC(=NO1)S(=O)(=O)CC2=C(N(N=C2C(F)(F)F)C)OC(F)F)C	1	3	3	2	Moderate	4.0437	In	4	0.00889324	0.973285
891	Formparanate	CC1=C(C=CC(=C1)OC(=O)NC)N=CN(C)C	1	3	3	2	Moderate	4.04229	In	4	0.0102086	0.969334
178	Bentazone	CC(C)N1C(=O)C2=CC=CC=C2NS1(=O)=O	1	3	3	2	Moderate	4.04046	In	4	0.0119191	0.964195
42	2,5-dichlorobenzoic acid methyl ester	COC(=O)C1=C(C=CC(=C1)Cl)Cl	1	3	3	2	Moderate	4.03972	In	4	0.0126081	0.962126
297	Carbofuran	CC1(CC2=C(O1)C(=CC=C2)OC(=O)NC)C	1	3	3	2	Moderate	4.0394	In	4	0.0129038	0.961237
563	Diethofencarb	CCOC1=C(C=C(C=C1)NC(=O)OC(C)C)OCC	1	3	3	2	Moderate	4.03936	In	4	0.0129402	0.961128
456	Cyclopyrimorate	CC1=CC=CC(=C1OC2=NN=C(C=C2OC(=O)N3CCOCC3)Cl)C4CC4	1	3	3	2	Moderate	4.03849	In	4	0.0137564	0.958676
1128	Mephenate	CNC(=O)Oc1ccc(Cl)cc1	1	3	3	2	Moderate	4.03765	In	4	0.0145364	0.956333
1154	Methasulfocarb	CNC(=O)SC1=CC=C(C=C1)OS(=O)(=O)C	1	3	3	2	Moderate	4.03732	In	10	0.122049	0.723639
43	2,6-dichloro-N-((4-(trifluoromethyl)phenyl)methyl-benzamide	C1=CC(=C(C(=C1)Cl)C(=O)NCC2=CC=C(C=C2)C(F)(F)F)Cl	1	3	3	2	Moderate	4.03692	In	4	0.0152159	0.954292
114	Aminopyrofen	CC1=NC(=C(C=C1)C(=O)OCC2=CC=C(C=C2)OC3=CC=CC=C3)N	1	3	3	2	Moderate	4.03657	In	4	0.0155458	0.953301
888	Formetanate	CNC(=O)OC1=CC=CC(=C1)N=CN(C)C	1	3	3	2	Moderate	4.03622	In	4	0.0158709	0.952324
889	Formetanate hydrochloride	CNC(=O)OC1=CC=CC(=C1)N=CN(C)C.Cl	1	3	3	2	Moderate	4.03622	In	4	0.0158709	0.952324
739	Fenoprop-methyl	CC(C(=O)OC)OC1=CC(=C(C=C1Cl)Cl)Cl	1	3	3	2	Moderate	4.03359	In	4	0.018329	0.94494
1426	Pyribenzoxim	COC1=CC(=NC(=N1)OC2=C(C(=CC=C2)OC3=NC(=CC(=N3)OC)OC)C(=O)ON=C(C4=CC=CC=C4)C5=CC=CC=C5)OC	1	3	3	2	Moderate	4.03346	In	4	0.018443	0.944598
736	Fenoprop-butotyl	CCCCOCCOC(=O)C(C)OC1=CC(=C(C=C1Cl)Cl)Cl	1	3	3	2	Moderate	4.03322	In	4	0.0186674	0.943924
270	Butoxycarboxim	CC(C(=NOC(=O)NC)C)S(=O)(=O)C	1	3	3	2	Moderate	4.03319	In	4	0.018697	0.943835
735	Fenoprop-butometyl	CCCCOCC(C)OC(=O)C(C)OC1=CC(=C(C=C1Cl)Cl)Cl	1	3	3	2	Moderate	4.03223	In	4	0.0195985	0.941127
1383	Propoxur	CC(C)OC1=CC=CC=C1OC(=O)NC	1	3	3	2	Moderate	4.03066	In	4	0.0210601	0.936736
595	Dimethyl(4-piperidinocarbonyloxy-2,5-xylyl)sulfonium toluene-4-sulfonate	C[S+](C)c1cc(C)c(OC(=O)N2CCCCC2)cc1C	1	3	3	2	Moderate	4.0294	In	10	0.126809	0.711519
66	Acetoprole	CC(=O)C1=NN(C(=C1S(=O)C)N)C2=C(C=C(C=C2Cl)C(F)(F)F)Cl	1	3	3	2	Moderate	4.02866	In	4	0.0229221	0.931143
1539	Tebufenozide	CCC1=CC=C(C=C1)C(=O)NN(C(=O)C2=CC(=CC(=C2)C)C)C(C)(C)C	1	3	3	2	Moderate	4.02799	In	4	0.023546	0.929268
390	Chromafenozide	CC1=CC(=CC(=C1)C(=O)N(C(C)(C)C)NC(=O)C2=C(C3=C(C=C2)OCCC3)C)C	1	3	3	2	Moderate	4.02679	In	4	0.0246676	0.925899
791	Fluacrypyrim	CC(C)OC1=NC(=CC(=N1)OCC2=CC=CC=C2C(=COC)C(=O)OC)C(F)(F)F	1	3	3	2	Moderate	4.02675	In	4	0.0247079	0.925778
292	Carbanolate	CC1=CC(=C(C=C1C)Cl)OC(=O)NC	1	3	3	2	Moderate	4.02481	In	4	0.0265174	0.920342
1040	Isopyrazam	CC(C)C1C2CCC1C3=C2C=CC=C3NC(=O)C4=CN(N=C4C(F)F)C	1	3	3	2	Moderate	4.02302	In	4	0.0281869	0.915327
1324	Phthalide	C1C2=C(C(=C(C(=C2Cl)Cl)Cl)Cl)C(=O)O1	1	3	3	2	Moderate	4.02294	In	4	0.0282628	0.915099
942	Haloxyfop-P-methyl	CC(C(=O)OC)OC1=CC=C(C=C1)OC2=C(C=C(C=N2)C(F)(F)F)Cl	1	3	3	2	Moderate	4.02118	In	4	0.029903	0.910172
191	Benzofenap	CC1=CC=C(C=C1)C(=O)COC2=C(C(=NN2C)C)C(=O)C3=C(C(=C(C=C3)Cl)C)Cl	1	3	3	2	Moderate	4.02106	In	4	0.0300108	0.909848
1479	Sedaxane	CN1C=C(C(=N1)C(F)F)C(=O)NC2=CC=CC=C2C3CC3C4CC4	1	3	3	2	Moderate	4.01855	In	4	0.0323577	0.902798
940	Haloxyfop-etotyl	CCOCCOC(=O)C(C)OC1=CC=C(C=C1)OC2=C(C=C(C=N2)C(F)(F)F)Cl	1	3	3	2	Moderate	4.01707	In	4	0.033738	0.898652
323	Chlorazifop propargyl	CC(C(=O)OCC#C)OC1=CC=C(C=C1)OC2=C(C=C(C=N2)Cl)Cl	1	3	3	2	Moderate	4.01693	In	4	0.0338658	0.898268
295	Carbendazim	COC(=O)NC1=NC2=CC=CC=C2N1	1	3	3	2	Moderate	4.01638	In	4	0.0343747	0.896739
205	Bifenazate	CC(C)OC(=O)NNC1=C(C=CC(=C1)C2=CC=CC=C2)OC	1	3	3	2	Moderate	4.01563	In	4	0.0350782	0.894626
1422	Pyrazoxyfen	CC1=NN(C(=C1C(=O)C2=C(C=C(C=C2)Cl)Cl)OCC(=O)C3=CC=CC=C3)C	1	3	3	2	Moderate	4.01548	In	4	0.0352134	0.89422
165	Bendiocarb	CC1(OC2=C(O1)C(=CC=C2)OC(=O)NC)C	1	3	3	2	Moderate	4.01544	In	4	0.0352499	0.89411
1534	Swep	COC(=O)NC1=CC(=C(C=C1)Cl)Cl	1	3	3	2	Moderate	4.01412	In	4	0.0364853	0.890399
847	Fluoxapiprolin	CS(=O)(=O)OC1=C(C(=CC=C1)Cl)C2CC(=NO2)C3=CSC(=N3)C4CCN(CC4)C(=O)CN5C(=CC(=N5)C(F)F)C(F)F	1	3	3	2	Moderate	4.01411	In	10	0.194478	0.703716
1647	Triclopyr-butotyl	CCCCOCCOC(=O)COC1=NC(=C(C=C1Cl)Cl)Cl	1	3	3	2	Moderate	4.01398	In	4	0.0366188	0.889998
824	Fluindapyr	CC1CC(C)(C)c2c(ccc(c12)N=C(c3cn(C)nc3C(F)F)O)F	1	3	3	2	Moderate	4.01241	In	4	0.0380774	0.885616
672	Ethaboxam	CCC1=C(SC(=N1)NCC)C(=O)NC(C#N)C2=CC=CS2	1	3	3	2	Moderate	4.01203	In	4	0.126911	0.650065
919	Glyceryl distearate	CCCCCCCCCCCCCCCCCC(=O)OCC(COC(=O)CCCCCCCCCCCCCCCCC)O	1	3	3	2	Moderate	4.01107	In	4	0.0393301	0.881853
186	Benzamacril isobutyl	CC(C)COC(=O)C(=CN(C)CC1=CC=CC=C1)C#N	1	3	3	2	Moderate	4.01085	In	4	0.0395379	0.881229
997	Inpyrfluxam	CC1CC(C2=C1C(=CC=C2)NC(=O)C3=CN(N=C3C(F)F)C)(C)C	1	3	3	2	Moderate	4.01025	In	4	0.0400916	0.879566
81	Aldicarb	CC(C)(C=NOC(=O)NC)SC	1	3	3	2	Moderate	4.01003	In	4	0.0402976	0.878947
899	Fufenozide	CC1CC2=C(O1)C(=C(C=C2)C(=O)NN(C(=O)C3=CC(=CC(=C3)C)C)C(C)(C)C)C	1	3	3	2	Moderate	4.00975	In	4	0.0405638	0.878147
1577	Thiazafluron	CNC(=O)N(C)C1=NN=C(S1)C(F)(F)F	1	3	3	2	Moderate	4.00872	In	4	0.0415186	0.875279
1441	Pyriminostrobin	COC=C(C1=CC=CC=C1COC2=NC(=NC(=C2)C(F)(F)F)NC3=C(C=C(C=C3)Cl)Cl)C(=O)OC	1	3	3	2	Moderate	4.00862	In	4	0.0416107	0.875002
303	Carboxazole	CC(C)(C)C1=CC(=NO1)NC(=O)OC	1	3	3	2	Moderate	4.00828	In	4	0.041934	0.874031
157	Benalaxyl	CC1=C(C(=CC=C1)C)N(C(C)C(=O)OC)C(=O)CC2=CC=CC=C2	1	3	3	2	Moderate	4.007	In	4	0.0431237	0.870457
158	Benalaxyl-M	CC1=C(C(=CC=C1)C)N(C(C)C(=O)OC)C(=O)CC2=CC=CC=C2	1	3	3	2	Moderate	4.007	In	4	0.0431237	0.870457
581	Dimefuron	CC(C)(C)C1=NN(C(=O)O1)C2=C(C=C(C=C2)NC(=O)N(C)C)Cl	1	3	3	2	Moderate	4.00594	In	4	0.0441183	0.86747
1343	Plifenate	CC(=O)OC(C1=CC(=C(C=C1)Cl)Cl)C(Cl)(Cl)Cl	1	3	3	2	Moderate	4.00574	In	4	0.0443033	0.866914
495	Debacarb	CCOCCOCCOC(=O)NC1=NC2=CC=CC=C2N1	1	3	3	2	Moderate	4.00377	In	4	0.0461406	0.861395
403	Cloethocarb	CNC(=O)OC1=CC=CC=C1OC(CCl)OC	1	3	3	2	Moderate	4.00314	In	4	0.0467268	0.859634
817	Flufenoxadiazam	C1=CC=C(C(=C1)NC(=O)C2=CC=C(C=C2)C3=NOC(=N3)C(F)(F)F)F	1	3	3	2	Moderate	4.00308	In	4	0.0467819	0.859468
402	Clodinafop propargyl	CC(C(=O)OCC#C)OC1=CC=C(C=C1)OC2=NC=C(C=C2F)Cl	1	3	3	2	Moderate	4.00307	In	4	0.0467933	0.859434
1329	Picolinafen	C1=CC(=CC(=C1)OC2=CC=CC(=N2)C(=O)NC3=CC=C(C=C3)F)C(F)(F)F	1	3	3	2	Moderate	4.00123	In	4	0.0485108	0.854275
1643	Trichlamide	CCCCOC(C(Cl)(Cl)Cl)NC(=O)C1=CC=CC=C1O	1	3	3	2	Moderate	4.00116	In	4	0.0485767	0.854077
524	Dicamba methyl	COC1=C(C=CC(=C1C(=O)OC)Cl)Cl	1	3	3	2	Moderate	4.00053	In	4	0.0491627	0.852316
154	Barban	C1=CC(=CC(=C1)Cl)NC(=O)OCC#CCCl	1	3	3	2	Moderate	3.99924	In	4	0.0503585	0.848724
868	Fluroxypyr-meptyl	CCCCCCC(C)OC(=O)COC1=NC(=C(C(=C1Cl)N)Cl)F	1	3	3	2	Moderate	3.99671	In	4	0.052724	0.841618
834	Fluopicolide	C1=CC(=C(C(=C1)Cl)C(=O)NCC2=C(C=C(C=N2)C(F)(F)F)Cl)Cl	1	3	3	2	Moderate	3.99614	In	4	0.0532541	0.840026
110	Aminocyclopyrachlor-methyl	COC(=O)C1=C(C(=NC(=N1)C2CC2)N)Cl	1	3	3	2	Moderate	3.9952	In	4	0.0541347	0.837381
394	Ciobutide	CCC(C#N)(C1=CC=CC=C1)C(=O)N	1	3	3	2	Moderate	3.99428	In	4	0.0549913	0.834807
811	Flucythrinate	CC(C)C(C1=CC=C(C=C1)OC(F)F)C(=O)OC(C#N)C2=CC(=CC=C2)OC3=CC=CC=C3	1	3	3	2	Moderate	3.99418	In	4	0.0550812	0.834538
864	Flurenol-butyl	CCCCOC(=O)C1(C2=CC=CC=C2C3=CC=CC=C31)O	1	3	3	2	Moderate	3.99414	In	4	0.0551217	0.834416
229	Brofluthrinate	CC(C)C(C1=CC=C(C=C1)OC(F)F)C(=O)OC(C#N)C2=CC(=CC=C2)OC3=CC=C(C=C3)Br	1	3	3	2	Moderate	3.99212	In	4	0.0569991	0.828776
328	Chlorbufam	CC(C#C)OC(=O)NC1=CC(=CC=C1)Cl	1	3	3	2	Moderate	3.99189	In	4	0.0572197	0.828113
1168	Methoxyfenozide	CC1=CC(=CC(=C1)C(=O)N(C(C)(C)C)NC(=O)C2=C(C(=CC=C2)OC)C)C	1	3	3	2	Moderate	3.9917	In	4	0.0573938	0.82759
1242	Nitrilacarb	CC(C)(CCC#N)C=NOC(=O)NC	1	3	3	2	Moderate	3.98974	In	4	0.0592247	0.82209
1020	Isocarbamid	CC(C)CNC(=O)N1CCNC1=O	1	3	3	2	Moderate	3.98679	In	4	0.0619722	0.813837
1442	Pyrimisulfan	COCC1=C(C(=CC=C1)C(C2=NC(=CC(=N2)OC)OC)O)NS(=O)(=O)C(F)F	1	3	3	2	Moderate	3.98458	In	10	0.19245	0.731244
1411	Pyrametostrobin	CC1=C(N(N=C1C2=CC=CC=C2)C)OCC3=CC=CC=C3N(C(=O)OC)OC	1	3	3	2	Moderate	3.98403	In	4	0.0645526	0.806086
935	Halofenozide	CC(C)(C)N(C(=O)C1=CC=CC=C1)NC(=O)C2=CC=C(C=C2)Cl	1	3	3	2	Moderate	3.97934	In	4	0.0689255	0.792949
1407	Pyraclostrobin	COC(=O)N(C1=CC=CC=C1COC2=NN(C=C2)C3=CC=C(C=C3)Cl)OC	1	3	3	2	Moderate	3.97761	In	4	0.0705344	0.788116
1235	Niclosamide	C1=CC(=C(C=C1[N+](=O)[O-])Cl)NC(=O)C2=C(C=CC(=C2)Cl)O	1	3	3	2	Moderate	3.97513	In	4	0.0728485	0.781165
1260	Ofurace	CC1=C(C(=CC=C1)C)N(C2CCOC2=O)C(=O)CCl	1	3	3	2	Moderate	3.97445	In	4	0.0734878	0.779244
807	Fluchloraminopyr-tefuryl	CC(C(=O)OCC1CCCO1)OC2=NC(=C(C(=C2Cl)N)Cl)F	1	3	3	2	Moderate	3.97375	In	4	0.0741359	0.777298
268	Butonate	CCCC(=O)OC(C(Cl)(Cl)Cl)P(=O)(OC)OC	1	3	3	2	Moderate	3.9721	In	4	0.0756801	0.772659
1408	Pyraflufen-ethyl	CCOC(=O)COC1=C(C=C(C(=C1)C2=NN(C(=C2Cl)OC(F)F)C)F)Cl	1	3	3	2	Moderate	3.97201	In	4	0.0757621	0.772412
1634	Triazamate	CCOC(=O)CSC1=NC(=NN1C(=O)N(C)C)C(C)(C)C	1	3	3	2	Moderate	3.97124	In	4	0.0764736	0.770275
1694	Zoxamide	CCC(C)(C(=O)CCl)NC(=O)C1=CC(=C(C(=C1)Cl)C)Cl	1	3	3	2	Moderate	3.97121	In	4	0.0765036	0.770185
1327	Picloram-isoctyl	CC(C)CCCCCOC(=O)C1=NC(=C(C(=C1Cl)N)Cl)Cl	1	3	3	2	Moderate	3.97049	In	4	0.0771787	0.768157
1568	Tetramethylfluthrin	CC1(C(C1(C)C)C(=O)OCC2=C(C(=C(C(=C2F)F)COC)F)F)C	1	3	3	2	Moderate	3.96907	In	4	0.0784978	0.764194
953	Hexadecanoic acid	CCCCCCCCCCCCCCCC(=O)O	1	3	3	2	Moderate	3.96607	In	4	0.0812953	0.755791
455	Cycloprothrin	CCOC1=CC=C(C=C1)C2(CC2(Cl)Cl)C(=O)OC(C#N)C3=CC(=CC=C3)OC4=CC=CC=C4	1	3	3	2	Moderate	3.96588	In	4	0.081475	0.755251
1518	Sulcofuron	C1=CC(=C(C=C1NC(=O)NC2=C(C=CC(=C2)Cl)OC3=C(C=C(C=C3)Cl)S(=O)(=O)O)Cl)Cl	1	3	3	2	Moderate	3.96549	In	4	0.0818383	0.75416
1519	Sulcofuron-sodium	C1=CC(=C(C=C1NC(=O)NC2=C(C=CC(=C2)Cl)OC3=C(C=C(C=C3)Cl)S(=O)(=O)[O-])Cl)Cl	1	3	3	2	Moderate	3.96017	In	4	0.0868041	0.739243
1648	Triclopyricarb	COC(=O)N(C1=CC=CC=C1COC2=NC(=C(C=C2Cl)Cl)Cl)OC	1	3	3	2	Moderate	3.95912	In	4	0.0877862	0.736292
1221	N-(3-chloro-2,6-dimethylphenyl)-2-methoxy-N-(tetrahydr-2-oxo-3-furanyl)acetamide	COCC(=O)N(C1CCOC1=O)c2c(C)ccc(Cl)c2C	1	3	3	2	Moderate	3.95808	In	4	0.0887544	0.733384
1603	Tigolaner	CN1C(=C(C(=N1)C(C(F)(F)F)(F)F)C(F)(F)F)N2C=C(C=N2)C3=CC(=C(C=C3)Cl)C(=O)NC4(CC4)C#N	1	3	3	2	Moderate	3.95619	In	4	0.0905187	0.728084
829	Flumiclorac-pentyl	CCCCCOC(=O)COC1=C(C=C(C(=C1)N2C(=O)C3=C(C2=O)CCCC3)F)Cl	1	3	3	2	Moderate	3.95301	In	4	0.0934773	0.719197
873	Fluthiacet	C1CCN2C(=O)SC(=NC3=CC(=C(C=C3F)Cl)SCC(=O)O)N2C1	1	3	3	2	Moderate	3.9519	In	4	0.0945203	0.716063
242	Bromopropylate	CC(C)OC(=O)C(C1=CC=C(C=C1)Br)(C2=CC=C(C=C2)Br)O	1	3	3	2	Moderate	3.95173	In	4	0.0946763	0.715595
1303	Peroxyacetic acid	CC(=O)OO	1	3	3	2	Moderate	3.95087	In	4	0.0954751	0.713195
330	Chlordecone	C1(=O)C2(C3(C4(C1(C5(C2(C3(C(C45Cl)(Cl)Cl)Cl)Cl)Cl)Cl)Cl)Cl)Cl	1	3	3	2	Moderate	3.95076	In	4	0.0955806	0.712878
612	Dinosulfon	CCCCCCC(C)C1=CC(=CC(=C1OC(=O)SC)[N+](=O)[O-])[N+](=O)[O-]	1	3	3	2	Moderate	3.94743	In	4	0.0986832	0.703558
195	Benzoximate	CCON=C(C1=C(C=CC(=C1OC)Cl)OC)OC(=O)C2=CC=CC=C2	1	3	3	2	Moderate	3.94689	In	4	0.0991854	0.70205
278	Cafenstrole	CCN(CC)C(=O)N1C=NC(=N1)S(=O)(=O)C2=C(C=C(C=C2C)C)C	1	3	3	2	Moderate	3.94529	In	4	0.0972166	0.740029
350	Chlorflurenol methyl	COC(=O)C1(C2=CC=CC=C2C3=C1C=C(C=C3)Cl)O	1	3	3	2	Moderate	3.94327	In	4	0.102564	0.691901
1385	Propyl isome	CCCOC(=O)C1C(CC2=CC3=C(C=C2C1C(=O)OCCC)OCO3)C	1	3	3	2	Moderate	3.94212	In	4	0.103639	0.68867
1190	Metoxadiazone	COC1=CC=CC=C1N2C(=O)OC(=N2)OC	1	3	3	2	Moderate	3.94179	In	4	0.103946	0.68775
1050	Isoxaflutole	CS(=O)(=O)C1=C(C=CC(=C1)C(F)(F)F)C(=O)C2=C(ON=C2)C3CC3	1	3	3	2	Moderate	3.93981	In	4	0.105792	0.682204
611	Dinoseb acetate	CCC(C)C1=CC(=CC(=C1OC(=O)C)[N+](=O)[O-])[N+](=O)[O-]	1	3	3	2	Moderate	3.93949	In	4	0.106087	0.681317
562	Diethatyl ethyl	CCC1=C(C(=CC=C1)CC)N(CC(=O)OCC)C(=O)CCl	1	3	3	2	Moderate	3.93859	In	4	0.106929	0.678787
1328	Picloram-methyl	COC(=O)C1=NC(=C(C(=C1Cl)N)Cl)Cl	1	3	3	2	Moderate	3.937	In	4	0.108411	0.674336
1119	Medinoterb acetate	CC1=C(C=C(C(=C1[N+](=O)[O-])OC(=O)C)C(C)(C)C)[N+](=O)[O-]	1	3	3	2	Moderate	3.93564	In	4	0.109682	0.670517
615	Dinoterb acetate	CC(=O)OC1=C(C=C(C=C1[N+](=O)[O-])[N+](=O)[O-])C(C)(C)C	1	3	3	2	Moderate	3.93388	In	4	0.111321	0.665594
1401	Pydiflumetofen	CC(CC1=C(C=C(C=C1Cl)Cl)Cl)N(C(=O)C2=CN(N=C2C(F)F)C)OC	1	3	3	2	Moderate	3.93275	In	4	0.112381	0.662412
397	Clacyfos	CC(OC(=O)COC1=C(C=C(C=C1)Cl)Cl)P(=O)(OC)OC	1	3	3	2	Moderate	3.93204	In	4	0.113039	0.660435
1138	Metalaxyl	CC1=C(C(=CC=C1)C)N(C(C)C(=O)OC)C(=O)COC	1	3	3	2	Moderate	3.93087	In	4	0.114132	0.657151
1139	Metalaxyl-M	CC1=C(C(=CC=C1)C)N(C(C)C(=O)OC)C(=O)COC	1	3	3	2	Moderate	3.93087	In	4	0.114132	0.657151
358	Chlorobenzilate	CCOC(=O)C(C1=CC=C(C=C1)Cl)(C2=CC=C(C=C2)Cl)O	1	3	3	2	Moderate	3.92877	In	4	0.116091	0.651265
364	Chloropropylate	CC(C)OC(=O)C(C1=CC=C(C=C1)Cl)(C2=CC=C(C=C2)Cl)O	1	3	3	2	Moderate	3.92777	In	4	0.117022	0.648468
83	Aldoxycarb	CC(C)(C=NOC(=O)NC)S(=O)(=O)C	1	3	3	2	Moderate	3.92713	In	4	0.117616	0.646684
1158	Methiocarb	CC1=CC(=CC(=C1SC)C)OC(=O)NC	1	3	3	2	Moderate	3.92708	In	4	0.0947689	0.769063
1381	Propionic acid	CCC(=O)O	1	3	3	2	Moderate	3.92691	In	4	0.117821	0.646068
1615	Topramezone	CC1=C(C=CC(=C1C2=NOCC2)S(=O)(=O)C)C(=O)C3=CNN(C3=O)C	1	3	3	2	Moderate	3.92586	In	4	0.0947118	0.771082
32	2,2-dibromo-3-nitrilopropionamide	C(#N)C(C(=O)N)(Br)Br	1	3	3	2	Moderate	3.92492	In	4	0.119683	0.640474
665	Erbon	CC(C(=O)OCCOC1=CC(=C(C=C1Cl)Cl)Cl)(Cl)Cl	1	3	3	2	Moderate	3.92478	In	4	0.119807	0.640103
878	Fluvalinate	CC(C)C(C(=O)OC(C#N)C1=CC(=CC=C1)OC2=CC=CC=C2)NC3=C(C=C(C=C3)C(F)(F)F)Cl	1	3	3	2	Moderate	3.92368	In	4	0.12084	0.637
1535	Tau-fluvalinate	CC(C)C(C(=O)OC(C#N)C1=CC(=CC=C1)OC2=CC=CC=C2)NC3=C(C=C(C=C3)C(F)(F)F)Cl	1	3	3	2	Moderate	3.92368	In	4	0.12084	0.637
1028	Isoflucypram	FC(F)c1nn(C)c(F)c1C(=O)N(Cc1cc(Cl)ccc1C(C)C)C1CC1	1	3	3	2	Moderate	3.92215	In	4	0.12226	0.632734
1170	Methyl (((1-(5-(2-chloro-4-(trifluoromethyl)phenoxy)-2-nitrophenyl)-2-methoxyethylidene)amino)oxy)acetate	COCC(=NOCC(=O)OC)c1cc(Oc2ccc(cc2Cl)C(F)(F)F)ccc1[N+](=O)[O-]	1	3	3	2	Moderate	3.91338	In	4	0.130441	0.608158
933	Halauxifen-methyl	COC1=C(C=CC(=C1F)C2=NC(=C(C(=C2)N)Cl)C(=O)OC)Cl	1	3	3	2	Moderate	3.91289	In	4	0.130899	0.606783
1059	Karbutilate	CC(C)(C)NC(=O)OC1=CC=CC(=C1)NC(=O)N(C)C	1	3	3	2	Moderate	3.91089	In	4	0.132764	0.601181
224	Bixafen	CN1C=C(C(=N1)C(F)F)C(=O)NC2=C(C=C(C=C2)F)C3=CC(=C(C=C3)Cl)Cl	1	3	3	2	Moderate	3.90947	In	4	0.13409	0.597198
1014	Iprovalicarb	CC1=CC=C(C=C1)C(C)NC(=O)C(C(C)C)NC(=O)OC(C)C	1	3	3	2	Moderate	3.90919	In	4	0.13435	0.596416
28	1-naphthylacetic acid	C1=CC=C2C(=C1)C=CC=C2CC(=O)O	1	3	3	2	Moderate	3.90749	In	4	0.135939	0.591642
1137	Metaflumizone	C1=CC(=CC(=C1)C(F)(F)F)C(=NNC(=O)NC2=CC=C(C=C2)OC(F)(F)F)CC3=CC=C(C=C3)C#N	1	3	3	2	Moderate	3.90642	In	4	0.136936	0.588648
235	Bromobonil	C1CC(OC1)COC(=O)OC2=C(C=C(C=C2Br)C#N)Br	1	3	3	2	Moderate	3.9036	In	4	0.139569	0.580739
1104	MCPB	CC1=C(C=CC(=C1)Cl)OCCCC(=O)O	1	3	3	2	Moderate	3.90352	In	4	0.139636	0.580538
99	Ametridione	CCSC1=NC(=O)N(C(=O)N1N)CC(C)(C)C	1	3	3	2	Moderate	3.9034	In	4	0.139754	0.580181
659	Epocholeone	CC[C@H]([C@@H]1[C@H](O1)[C@@H](C)[C@H]2CC[C@@H]3[C@@]2(CC[C@H]4[C@H]3COC(=O)[C@@H]5[C@@]4(C[C@H]([C@H](C5)OC(=O)CC)OC(=O)CC)C)C)C(C)C	1	3	3	2	Moderate	3.90236	In	4	0.140721	0.577278
308	Cartap	CN(C)C(CSC(=O)N)CSC(=O)N	1	3	3	2	Moderate	3.9017	In	4	0.141341	0.575416
309	Cartap hydrochloride	CN(C)C(CSC(=O)N)CSC(=O)N.Cl	1	3	3	2	Moderate	3.9017	In	4	0.141341	0.575416
815	Flufenacet	CC(C)N(C1=CC=C(C=C1)F)C(=O)COC2=NN=C(S2)C(F)(F)F	1	3	3	2	Moderate	3.90099	In	4	0.0965048	0.734259
798	Fluazolate	CC(C)OC(=O)C1=C(C=C(C(=C1)C2=NN(C(=C2Br)C(F)(F)F)C)F)Cl	1	3	3	2	Moderate	3.8967	In	4	0.145997	0.56143
449	Cyclaniliprole	CC(C1CC1)NC(=O)C2=CC(=CC(=C2NC(=O)C3=CC(=NN3C4=C(C=CC=N4)Cl)Br)Br)Cl	1	3	3	2	Moderate	3.896	In	4	0.146651	0.559465
197	Benzoylprop-ethyl	CCOC(=O)C(C)N(C1=CC(=C(C=C1)Cl)Cl)C(=O)C2=CC=CC=C2	1	3	3	2	Moderate	3.89592	In	4	0.146724	0.559245
1418	Pyrazolynate	CC1=CC=C(C=C1)S(=O)(=O)OC2=C(C(=NN2C)C)C(=O)C3=C(C=C(C=C3)Cl)Cl	1	3	3	2	Moderate	3.8954	In	4	0.0976641	0.722067
1587	Thiocyclam	CC(=NOC(=O)N(C)SN(C)C(=O)ON=C(C)SC)SC	1	3	3	2	Moderate	3.89532	In	10	0.210249	0.613013
1589	Thiodicarb	CC(=NOC(=O)N(C)SN(C)C(=O)ON=C(C)SC)SC	1	3	3	2	Moderate	3.89532	In	10	0.210249	0.613013
1270	Oxadixyl	CC1=C(C(=CC=C1)C)N(C(=O)COC)N2CCOC2=O	1	3	3	2	Moderate	3.89531	In	4	0.147297	0.557523
876	Flutolanil	CC(C)OC1=CC=CC(=C1)NC(=O)C2=CC=CC=C2C(F)(F)F	1	3	3	2	Moderate	3.89482	In	4	0.147757	0.556142
38	2,4-DB	OC(=O)CCCOC1=C(Cl)C=C(Cl)C=C1	1	3	3	2	Moderate	3.8893	In	4	0.152904	0.540681
576	Diflufenican	C1=CC(=CC(=C1)OC2=C(C=CC=N2)C(=O)NC3=C(C=C(C=C3)F)F)C(F)(F)F	1	3	3	2	Moderate	3.88921	In	4	0.152985	0.540436
1679	Urea sulphate	NC(N)=O	1	3	3	2	Moderate	3.88898	In	4	0.153203	0.539783
1685	Vinegar	CC(=O)O	1	3	3	2	Moderate	3.88898	In	4	0.153203	0.539783
206	Bifenox	COC(=O)C1=C(C=CC(=C1)OC2=C(C=C(C=C2)Cl)Cl)[N+](=O)[O-]	1	3	3	2	Moderate	3.88872	In	4	0.153444	0.539059
347	Chlorfluren	C1=CC=C2C3=C(C=C(C=C3)Cl)C(C2=C1)C(=O)O	1	3	3	2	Moderate	3.88836	In	4	0.153774	0.538067
102	Amicarbazone	CC(C)C1=NN(C(=O)N1N)C(=O)NC(C)(C)C	1	3	3	2	Moderate	3.88423	In	4	0.157631	0.52648
800	Flubeneteram	CN1C=C(C(=N1)C(F)F)C(=O)NC2=CC=CC=C2OC3=C(C=C(C=C3)C(F)(F)F)Cl	1	3	3	2	Moderate	3.88018	In	38	0.154497	0
903	Furalaxyl	CC1=C(C(=CC=C1)C)N(C(C)C(=O)OC)C(=O)C2=CC=CO2	1	3	3	2	Moderate	3.87814	In	38	0.152783	0
785	Flometoquin	CCC1=NC2=CC(=C(C=C2C(=C1C)OC(=O)OC)OC3=CC=C(C=C3)OC(F)(F)F)C	1	3	3	2	Moderate	3.87738	In	38	0.152143	0
321	Chlorantraniliprole	CC1=C(C(=CC(=C1)Cl)C(=O)NC)NC(=O)C2=CC(=NN2C3=C(C=CC=N3)Cl)Br	1	3	3	2	Moderate	3.87654	In	38	0.151439	0
1365	Promacyl	CCCC(=O)N(C)C(=O)OC1=CC(=CC(=C1)C(C)C)C	1	3	3	2	Moderate	3.8762	In	38	0.15115	0
33	2,3,5-tri-iodobenzoic acid	C1=C(C=C(C(=C1I)I)C(=O)O)I	1	3	3	2	Moderate	3.87533	In	38	0.150425	0
880	Fluxapyroxad	CN1C=C(C(=N1)C(F)F)C(=O)NC2=CC=CC=C2C3=CC(=C(C(=C3)F)F)F	1	3	3	2	Moderate	3.87456	In	38	0.149779	0
58	ACC	C1CC1(C(=O)O)N	1	3	3	2	Moderate	3.874	In	38	0.149307	0
851	Flupoxam	C1=CC=C(C=C1)C2=NC(=NN2C3=CC(=C(C=C3)Cl)COCC(C(F)(F)F)(F)F)C(=O)N	1	3	3	2	Moderate	3.87214	In	38	0.147741	0
193	Benzoic acid	C1=CC=C(C=C1)C(=O)O	1	3	3	2	Moderate	3.86925	In	38	0.145314	0
970	Imazamethabenz	CC1=CC(=C(C=C1)C(=O)O)C2=NC(C(=O)N2)(C)C(C)C	1	3	3	2	Moderate	3.86611	In	38	0.142678	0
426	Copper naphthenate	CCC1CCC(CCC([O-])=O)CC1	1	3	3	2	Moderate	3.86407	In	38	0.140957	0
1307	Phenobenzuron	CN(C)C(=O)N(C1=CC(=C(C=C1)Cl)Cl)C(=O)C2=CC=CC=C2	1	3	3	2	Moderate	3.861	In	38	0.138379	0
839	Fluoroacetamide	C(C(=O)N)F	1	3	3	2	Moderate	3.85503	In	38	0.133369	0
645	Dufulin	CCOP(=O)(C(C1=CC=CC=C1F)NC2=NC3=C(C=CC=C3S2)C)OCC	1	3	3	2	Moderate	3.85269	In	10	0.288675	0.644621
882	Folpet	C1=CC=C2C(=C1)C(=O)N(C2=O)SC(Cl)(Cl)Cl	1	3	3	2	Moderate	3.85058	In	38	0.129628	0
1045	Isoval	CC(C)CC(=O)C1C(=O)C2=CC=CC=C2C1=O	1	3	3	2	Moderate	3.84653	In	38	0.126222	0
1122	Mefenpyr diethyl	CCOC(=O)C1=NN(C(C1)(C)C(=O)OCC)C2=C(C=C(C=C2)Cl)Cl	1	3	3	2	Moderate	3.84629	In	38	0.126019	0
789	Florpyrauxifen-benzyl	COC1=C(C=CC(=C1F)C2=NC(=C(C(=C2F)N)Cl)C(=O)OCC3=CC=CC=C3)Cl	1	3	3	2	Moderate	3.84431	In	38	0.124356	0
520	Dibutyl phthalate	CCCCOC(=O)C1=CC=CC=C1C(=O)OCCCC	1	3	3	2	Moderate	3.84225	In	38	0.122626	0
445	Cyantraniliprole	CC1=CC(=CC(=C1NC(=O)C2=CC(=NN2C3=C(C=CC=N3)Cl)Br)C(=O)NC)C#N	1	3	3	2	Moderate	3.8374	In	38	0.118551	0
296	Carbetamide	CCNC(=O)C(C)OC(=O)NC1=CC=CC=C1	1	3	3	2	Moderate	3.83733	In	38	0.118492	0
1023	Isocycloseram	CCN1C(=O)C(CO1)NC(=O)C2=C(C=C(C=C2)C3=NOC(C3)(C4=CC(=C(C(=C4)Cl)F)Cl)C(F)(F)F)C	1	3	3	2	Moderate	3.83618	In	38	0.117526	0
836	Fluopyram	C1=CC=C(C(=C1)C(=O)NCCC2=C(C=C(C=N2)C(F)(F)F)Cl)C(F)(F)F	1	3	3	2	Moderate	3.83545	In	38	0.116914	0
779	Flamprop-isopropyl	CC(C)OC(=O)C(C)N(C1=CC(=C(C=C1)F)Cl)C(=O)C2=CC=CC=C2	1	3	3	2	Moderate	3.83356	In	38	0.11532	0
781	Flamprop-M-isopropyl	CC(C)OC(=O)C(C)N(C1=CC(=C(C=C1)F)Cl)C(=O)C2=CC=CC=C2	1	3	3	2	Moderate	3.83356	In	38	0.11532	0
70	Acifluorfen-methyl	COC(=O)C1=C(C=CC(=C1)OC2=C(C=C(C=C2)C(F)(F)F)Cl)[N+](=O)[O-]	1	3	3	2	Moderate	3.83334	In	38	0.115138	0
904	Furalaxyl-M	CC1=C(C(=CC=C1)C)N(C(C)C(=O)OC)C(=O)C2=CC=C(C=C2)C(=O)C3=CC=CC=C3	1	3	3	2	Moderate	3.83308	In	38	0.114921	0
130	Anisuron	CN(C)C(=O)N(C1=CC(=C(C=C1)Cl)Cl)C(=O)C2=CC=C(C=C2)OC	1	3	3	2	Moderate	3.83066	In	38	0.112884	0
53	2-naphthyloxyacetic acid	c1ccc2cc(ccc2c1)OCC(=O)O	1	3	3	2	Moderate	3.83034	In	38	0.112618	0
786	Flonicamid	C1=CN=CC(=C1C(F)(F)F)C(=O)NCC#N	1	3	3	2	Moderate	3.82987	In	38	0.112221	0
1110	Mecoprop	CC1=C(C=CC(=C1)Cl)OC(C)C(=O)O	1	3	3	2	Moderate	3.82283	In	38	0.106307	0
1111	Mecoprop dimethylammonium	CC1=C(C=CC(=C1)Cl)OC(C)C(=O)O.CNC	1	3	3	2	Moderate	3.82283	In	38	0.106307	0
1114	Mecoprop trolamine	CC1=C(C=CC(=C1)Cl)OC(C)C(=O)O.C(CO)N(CCO)CCO	1	3	3	2	Moderate	3.82283	In	38	0.106307	0
1003	Iofensulfuron	CC1=NC(=NC(=N1)OC)NC(=O)NS(=O)(=O)C2=CC=CC=C2I	1	3	3	2	Moderate	3.82201	In	38	0.105621	0
1091	MCPA	CC1=C(C=CC(=C1)Cl)OCC(=O)O	1	3	3	2	Moderate	3.82083	In	38	0.10463	0
1094	MCPA-dimethylammonium	CC1=C(C=CC(=C1)Cl)OCC(=O)O.CNC	1	3	3	2	Moderate	3.82083	In	38	0.10463	0
1095	MCPA-diolamine	CC1=C(C=CC(=C1)Cl)OCC(=O)O.C(CO)NCCO	1	3	3	2	Moderate	3.82083	In	38	0.10463	0
1102	MCPA-olamine	CC1=C(OCC(O)=O)C=CC(Cl)=C1	1	3	3	2	Moderate	3.82083	In	38	0.10463	0
336	Chlorfenac	C1=CC(=C(C(=C1Cl)CC(=O)O)Cl)Cl	1	3	3	2	Moderate	3.81952	In	38	0.103528	0
1	(4-chlorophenoxy)acetic acid	C1=CC(=CC=C1OCC(=O)O)Cl	1	3	3	2	Moderate	3.81908	In	38	0.103153	0
780	Flamprop-methyl	CC(C(=O)OC)N(C1=CC(=C(C=C1)F)Cl)C(=O)C2=CC=CC=C2	1	3	3	2	Moderate	3.81746	In	38	0.101795	0
782	Flamprop-M-methyl	CC(C(=O)OC)N(C1=CC(=C(C=C1)F)Cl)C(=O)C2=CC=CC=C2	1	3	3	2	Moderate	3.81746	In	38	0.101795	0
412	Cloprop	CC(C(=O)O)OC1=CC(=CC=C1)Cl	1	3	3	2	Moderate	3.81709	In	38	0.101484	0
340	Chlorfenprop	C1=CC(=CC=C1CC(C(=O)O)Cl)Cl	1	3	3	2	Moderate	3.81575	In	38	0.100357	0
648	Eglinazine	CCNC1=NC(=NC(=N1)Cl)NCC(=O)O	1	3	3	2	Moderate	3.81572	In	38	0.10033	0
170	Benomyl	CCCCNC(=O)N1C2=CC=CC=C2N=C1NC(=O)OC	1	3	3	2	Moderate	3.81569	In	38	0.100307	0
1048	Isoxadifen	C1C(=NOC1(C2=CC=CC=C2)C3=CC=CC=C3)C(=O)O	1	3	3	2	Moderate	3.81568	In	38	0.100299	0
1361	Proglinazine	CC(C)NC1=NC(=NC(=N1)NCC(=O)O)Cl	1	3	3	2	Moderate	3.81506	In	38	0.0997821	0
407	Clofibric acid	CC(C)(C(=O)O)OC1=CC=C(C=C1)Cl	1	3	3	2	Moderate	3.81408	In	38	0.0989589	0
408	Clofop	CC(C(=O)O)OC1=CC=C(C=C1)OC2=CC=C(C=C2)Cl	1	3	3	2	Moderate	3.8137	In	38	0.098637	0
1331	Pindone	CC(C)(C)C(=O)C1C(=O)C2=CC=CC=C2C1=O	1	3	3	2	Moderate	3.81101	In	38	0.0963752	0
762	Fenthiaprop	CC(C(=O)O)OC1=CC=C(C=C1)OC2=NC3=C(S2)C=C(C=C3)Cl	1	3	3	2	Moderate	3.8105	In	38	0.0959433	0
547	Diclofop	CC(C(=O)O)OC1=CC=C(C=C1)OC2=C(C=C(C=C2)Cl)Cl	1	3	3	2	Moderate	3.80643	In	38	0.092524	0
744	Fenoxaprop-P	CC(C(=O)O)OC1=CC=C(C=C1)OC2=NC3=C(O2)C=C(C=C3)Cl	1	3	3	2	Moderate	3.80331	In	38	0.0899036	0
770	Fentrazamide	CCN(C1CCCCC1)C(=O)N2C(=O)N(N=N2)C3=CC=CC=C3Cl	1	3	3	2	Moderate	3.80315	In	38	0.0897694	0
322	Chlorazifop	CC(C(=O)O)OC1=CC=C(C=C1)OC2=C(C=C(C=N2)Cl)Cl	1	3	3	2	Moderate	3.80211	In	38	0.0889002	0
135	Asulam	COC(=O)NS(=O)(=O)C1=CC=C(C=C1)N	1	3	3	2	Moderate	3.80186	In	38	0.0886829	0
380	Chlorsulfuron	CC1=NC(=NC(=N1)OC)NC(=O)NS(=O)(=O)C2=CC=CC=C2Cl	1	3	3	2	Moderate	3.79816	In	38	0.0855783	0
532	Dichlorprop	CC(C(=O)O)OC1=C(C=C(C=C1)Cl)Cl	1	3	3	2	Moderate	3.79754	In	38	0.0850562	0
534	Dichlorprop-dimethylammonium	CC(C(=O)O)OC1=C(C=C(C=C1)Cl)Cl.CNC	1	3	3	2	Moderate	3.79754	In	38	0.0850562	0
537	Dichlorprop-P	CC(C(=O)O)OC1=C(C=C(C=C1)Cl)Cl	1	3	3	2	Moderate	3.79754	In	38	0.0850562	0
541	Dichlorprop-P	CC(C(=O)O)OC1=C(C=C(C=C1)Cl)Cl	1	3	3	2	Moderate	3.79754	In	38	0.0850562	0
809	Flucofuron	C1=CC(=C(C=C1NC(=O)NC2=CC(=C(C=C2)Cl)C(F)(F)F)C(F)(F)F)Cl	1	3	3	2	Moderate	3.79749	In	38	0.085015	0
1305	Phenisopham	CCN(C1=CC=CC=C1)C(=O)OC2=CC=CC(=C2)NC(=O)OC(C)C	1	3	3	2	Moderate	3.79656	In	38	0.0842298	0
37	2,4-D	C1=CC(=C(C=C1Cl)Cl)OCC(=O)O	1	3	3	2	Moderate	3.79554	In	38	0.0833785	0
39	2,4-D-dimethylammonium	OC(=O)COC1=C(Cl)C=C(Cl)C=C1	1	3	3	2	Moderate	3.79554	In	38	0.0833785	0
1633	Triasulfuron	CC1=NC(=NC(=N1)OC)NC(=O)NS(=O)(=O)C2=CC=CC=C2OCCCl	1	3	3	2	Moderate	3.79506	In	38	0.0829701	0
1457	Quinmerac	CC1=CN=C2C(=C1)C=CC(=C2C(=O)O)Cl	1	3	3	2	Moderate	3.79392	In	38	0.082015	0
419	Cloxyfonac	C1=CC(=C(C=C1Cl)CO)OCC(=O)O	1	3	3	2	Moderate	3.78868	In	38	0.0776149	0
401	Clodinafop	CC(C(=O)O)OC1=CC=C(C=C1)OC2=NC=C(C=C2F)Cl	1	3	3	2	Moderate	3.78825	In	38	0.0772532	0
994	Indolauxipyr-cyanomethyl	C1=CC(=C(C2=C1C=CN2)F)C3=NC(=C(C(=C3F)N)Cl)C(=O)OCC#N	1	3	3	2	Moderate	3.78749	In	38	0.076615	0
466	Cyhalofop	CC(C(=O)O)OC1=CC=C(C=C1)OC2=C(C=C(C=C2)C#N)F	1	3	3	2	Moderate	3.78714	In	38	0.0763198	0
1578	Thiazopyr	CC(C)CC1=C(C(=NC(=C1C(=O)OC)C(F)F)C(F)(F)F)C2=NCCS2	1	3	3	2	Moderate	3.78454	In	38	0.074134	0
473	Cypendazole	COC(=O)NC1=NC2=CC=CC=C2N1C(=O)NCCCCCC#N	1	3	3	2	Moderate	3.78365	In	38	0.0733891	0
980	Imazethapyr	CCC1=CN=C(C(=C1)C(=O)O)C2=NC(C(=O)N2)(C)C(C)C	1	3	3	2	Moderate	3.7829	In	38	0.0727559	0
121	Ammonium acetate	CC(=O)[O-]	1	3	3	2	Moderate	3.78116	In	38	0.0712933	0
1591	Thiomersal	CC[Hg]SC1=CC=CC=C1C(=O)[O-]	1	3	3	2	Moderate	3.7806	In	38	0.0708246	0
734	Fenoprop	CC(C(=O)O)OC1=CC(=C(C=C1Cl)Cl)Cl	1	3	3	2	Moderate	3.78002	In	38	0.0703334	0
949	Hexachloroacetone	C(=O)(C(Cl)(Cl)Cl)C(Cl)(Cl)Cl	1	3	3	2	Moderate	3.77916	In	38	0.0696156	0
36	2,4,5-trichlorophenoxyacetic acid	C1=C(C(=CC(=C1Cl)Cl)Cl)OCC(=O)O	1	3	3	2	Moderate	3.77802	In	38	0.0686556	0
609	Dinopenton	CCCC(C)C1=CC(=CC(=C1OC(=O)OC(C)C)[N+](=O)[O-])[N+](=O)[O-]	1	3	3	2	Moderate	3.77793	In	38	0.0685759	0
862	Flurazole	C1=CC=C(C=C1)COC(=O)C2=C(N=C(S2)Cl)C(F)(F)F	1	3	3	2	Moderate	3.7774	In	38	0.0681318	0
393	Cinosulfuron	COCCOC1=CC=CC=C1S(=O)(=O)NC(=O)NC2=NC(=NC(=N2)OC)OC	1	3	3	2	Moderate	3.77597	In	38	0.0669315	0
605	Dinobuton	CCC(C)C1=CC(=CC(=C1OC(=O)OC(C)C)[N+](=O)[O-])[N+](=O)[O-]	1	3	3	2	Moderate	3.77577	In	38	0.0667655	0
1455	Quinclorac	C1=CC(=C(C2=NC=C(C=C21)Cl)C(=O)O)Cl	1	3	3	2	Moderate	3.77534	In	38	0.0664019	0
793	Fluazifop	CC(C(=O)O)OC1=CC=C(C=C1)OC2=NC=C(C=C2)C(F)(F)F	1	3	3	2	Moderate	3.77488	In	38	0.0660189	0
795	Fluazifop-P	CC(C(=O)O)OC1=CC=C(C=C1)OC2=NC=C(C=C2)C(F)(F)F	1	3	3	2	Moderate	3.77488	In	38	0.0660189	0
594	Dimethyl phthalate	COC(=O)C1=CC=CC=C1C(=O)OC	1	3	3	2	Moderate	3.77397	In	38	0.0652535	0
973	Imazapic	CC1=CN=C(C(=C1)C(=O)O)C2=NC(C(=O)N2)(C)C(C)C	1	3	3	2	Moderate	3.77362	In	38	0.0649558	0
974	Imazapic-ammonium	CC(C)C1(C)N=C(NC1=O)C1=C(C=C(C)C=N1)C(O)=O	1	3	3	2	Moderate	3.77362	In	38	0.0649558	0
1586	Thifluzamide	CC1=NC(=C(S1)C(=O)NC2=C(C=C(C=C2Br)OC(F)(F)F)Br)C(F)(F)F	1	3	3	2	Moderate	3.7727	In	38	0.0641847	0
982	Imazosulfuron	COC1=CC(=NC(=N1)NC(=O)NS(=O)(=O)C2=C(N=C3N2C=CC=C3)Cl)OC	1	3	3	2	Moderate	3.77208	In	38	0.063661	0
1299	Penthiopyrad	CC(C)CC(C)C1=C(C=CS1)NC(=O)C2=CN(N=C2C(F)(F)F)C	1	3	3	2	Moderate	3.77179	In	4	0.168552	0.452395
143	Azimsulfuron	CN1C(=C(C=N1)C2=NN(N=N2)C)S(=O)(=O)NC(=O)NC3=NC(=CC(=N3)OC)OC	1	3	3	2	Moderate	3.76901	In	38	0.0610798	0
906	Furathiocarb	CCCCOC(=O)N(C)SN(C)C(=O)OC1=CC=CC2=C1OC(C2)(C)C	1	3	3	2	Moderate	3.76866	In	38	0.0607908	0
607	Dinocton	CC(C)CCCCCC1=CC(=CC(=C1OC(=O)OC)[N+](=O)[O-])[N+](=O)[O-]	1	3	3	2	Moderate	3.76839	In	38	0.0605595	0
1004	Iofensulfuron sodium	CC1=NC(=NC(=N1)OC)NC(=NS(=O)(=O)C2=CC=CC=C2I)[O-]	1	3	3	2	Moderate	3.76811	In	38	0.0603231	0
975	Imazapyr	CC(C)C1(C(=O)NC(=N1)C2=C(C=CC=N2)C(=O)O)C	1	3	3	2	Moderate	3.76794	In	38	0.0601837	0
939	Haloxyfop	CC(C(=O)O)OC1=CC=C(C=C1)OC2=C(C=C(C=N2)C(F)(F)F)Cl	1	3	3	2	Moderate	3.76761	In	38	0.0599059	0
941	Haloxyfop-P	CC(C(=O)O)OC1=CC=C(C=C1)OC2=C(C=C(C=N2)C(F)(F)F)Cl	1	3	3	2	Moderate	3.76761	In	38	0.0599059	0
80	Alanycarb	CCOC(=O)CCN(CC1=CC=CC=C1)SN(C)C(=O)ON=C(C)SC	1	3	3	2	Moderate	3.76659	In	10	0.300005	0.544084
1387	Propyrisulfuron	CCCC1=NN2C(=NC(=C2S(=O)(=O)NC(=O)NC3=NC(=CC(=N3)OC)OC)Cl)C=C1	1	3	3	2	Moderate	3.7636	In	38	0.0565413	0
976	Imazaquin	CC(C)C1(C(=O)NC(=N1)C2=NC3=CC=CC=C3C=C2C(=O)O)C	1	3	3	2	Moderate	3.76179	In	38	0.0550203	0
1646	Triclopyr	C1=C(C(=NC(=C1Cl)Cl)OCC(=O)O)Cl	1	3	3	2	Moderate	3.76077	In	38	0.0541602	0
1649	Triclopyr-triethylammonium	CCN(CC)CC.C1=C(C(=NC(=C1Cl)Cl)OCC(=O)O)Cl	1	3	3	2	Moderate	3.76077	In	38	0.0541602	0
1210	Monosulfuron	CC1=NC(=NC=C1)NC(=O)NS(=O)(=O)C2=CC=CC=C2[N+](=O)[O-]	1	3	3	2	Moderate	3.7607	In	38	0.054097	0
881	Fluxofenim	C1COC(O1)CON=C(C2=CC=C(C=C2)Cl)C(F)(F)F	1	3	3	2	Moderate	3.76006	In	38	0.0535644	0
1417	Pyraziflumid	C1=CC=C(C(=C1)C2=CC(=C(C=C2)F)F)NC(=O)C3=NC=CN=C3C(F)(F)F	1	3	3	2	Moderate	3.75938	In	38	0.0529923	0
694	Ethoxysulfuron	CCOC1=CC=CC=C1OS(=O)(=O)NC(=O)NC2=NC(=CC(=N2)OC)OC	1	3	3	2	Moderate	3.75688	In	38	0.0508913	0
915	Glufosinate	CP(=O)(CCC(C(=O)O)N)O	1	3	3	2	Moderate	3.75658	In	38	0.0506406	0
316	Chloramben	C1=C(C=C(C(=C1N)Cl)C(=O)O)Cl	1	3	2	1	Bad/Unreliable	3.75489	In	38	0.0492145	0
921	Glyphosate	C(C(=O)O)NCP(=O)(O)O	1	3	2	1	Bad/Unreliable	3.75459	In	38	0.0489629	0
922	Glyphosate-dimethylammonium	CNC.C(C(=O)O)NCP(=O)(O)O	1	3	2	1	Bad/Unreliable	3.75459	In	38	0.0489629	0
923	Glyphosate-isopropylamine	CC(C)N.C(C(=O)O)NCP(=O)(O)O	1	3	2	1	Bad/Unreliable	3.75459	In	38	0.0489629	0
924	Glyphosate-monoammonium	OC(=O)CNCP(O)(O)=O	1	3	2	1	Bad/Unreliable	3.75459	In	38	0.0489629	0
1060	Kelevan	CCOC(=O)CCC(=O)CC1(C2(C3(C4(C1(C5(C2(C3(C(C45Cl)(Cl)Cl)Cl)Cl)Cl)Cl)Cl)Cl)Cl)O	1	3	2	1	Bad/Unreliable	3.75212	In	38	0.0468942	0
619	Diphacinone	C1=CC=C(C=C1)C(C2=CC=CC=C2)C(=O)C3C(=O)C4=CC=CC=C4C3=O	1	3	2	1	Bad/Unreliable	3.74863	In	38	0.0439547	0
136	Asulam sodium	COC(=O)[N-]S(=O)(=O)C1=CC=C(C=C1)N	1	3	2	1	Bad/Unreliable	3.74795	In	38	0.0433845	0
551	Dicloromezotiaz	CC1=C2N(C(=C(C(=O)[N+]2=CC=C1)C3=CC(=CC(=C3)Cl)Cl)[O-])CC4=CN=C(S4)Cl	1	3	3	2	Moderate	3.74746	In	38	0.175844	0
521	Dicamba	COC1=C(C=CC(=C1C(=O)O)Cl)Cl	1	3	2	1	Bad/Unreliable	3.74696	In	38	0.042554	0
522	Dicamba diglycolamine	COC1=C(C=CC(=C1C(=O)O)Cl)Cl.C(COCCO)N	1	3	2	1	Bad/Unreliable	3.74696	In	38	0.042554	0
523	Dicamba diolamine	COC1=C(Cl)C=CC(Cl)=C1C(O)=O	1	3	2	1	Bad/Unreliable	3.74696	In	38	0.042554	0
544	Dichlozoline	CC1(C(=O)N(C(=O)O1)C2=CC(=CC(=C2)Cl)Cl)C	1	3	2	1	Bad/Unreliable	3.74489	In	38	0.0408148	0
925	Glyphosate-trimesium	OC(=O)CNCP(O)([O-])=O	1	3	2	1	Bad/Unreliable	3.74261	In	38	0.0388966	0
509	Desmedipham	CCOC(=O)NC1=CC(=CC=C1)OC(=O)NC2=CC=CC=C2	1	3	2	1	Bad/Unreliable	3.74238	In	38	0.0387026	0
109	Aminocyclopyrachlor	C1CC1C2=NC(=C(C(=N2)N)Cl)C(=O)O	1	3	2	1	Bad/Unreliable	3.74163	In	38	0.0380745	0
1594	Thiophanate	CCOC(=O)NC(=S)NC1=CC=CC=C1NC(=S)NC(=O)OCC	1	3	2	1	Bad/Unreliable	3.73876	In	38	0.0356647	0
414	Clopyralid	C1=CC(=NC(=C1Cl)C(=O)O)Cl	1	3	2	1	Bad/Unreliable	3.73823	In	38	0.0352224	0
415	Clopyralid-olamine	C1=CC(=NC(=C1Cl)C(=O)O)Cl.C(CO)N	1	3	2	1	Bad/Unreliable	3.73823	In	38	0.0352224	0
792	Fluazaindolizine	COC1=CC(=C(C=C1)Cl)S(=O)(=O)NC(=O)C2=CN3C=C(C=C(C3=N2)Cl)C(F)(F)F	1	3	2	1	Bad/Unreliable	3.73812	In	38	0.0351257	0
972	Imazamox	CC(C)C1(C(=O)NC(=N1)C2=NC=C(C=C2C(=O)O)COC)C	1	3	2	1	Bad/Unreliable	3.73713	In	38	0.0342915	0
375	Chlorprocarb	CCC(CCl)NC(=O)OC1=CC=CC(=C1)NC(=O)OC	1	3	2	1	Bad/Unreliable	3.73624	In	38	0.0335469	0
34	2,3,6-TBA	C1=CC(=C(C(=C1Cl)C(=O)O)Cl)Cl	1	3	2	1	Bad/Unreliable	3.73624	In	38	0.0335446	0
1271	Oxamyl	CNC(=O)ON=C(C(=O)N(C)C)SC	1	3	3	2	Moderate	3.73437	In	38	0.16631	0
1391	Prosulfuron	CC1=NC(=NC(=N1)OC)NC(=O)NS(=O)(=O)C2=CC=CC=C2CCC(F)(F)F	1	3	2	1	Bad/Unreliable	3.73255	In	38	0.0304501	0
810	Flucycloxuron	C1CC1C(=NOCC2=CC=C(C=C2)NC(=O)NC(=O)C3=C(C=CC=C3F)F)C4=CC=C(C=C4)Cl	1	3	2	1	Bad/Unreliable	3.72885	In	38	0.0273404	0
116	Amisulbrom	CC1=C(C2=C(N1S(=O)(=O)C3=NN(C=N3)S(=O)(=O)N(C)C)C=C(C=C2)F)Br	1	3	3	2	Moderate	3.7208	In	10	0.3849	0.576347
1240	Nitralin	CCCN(CCC)C1=C(C=C(C=C1[N+](=O)[O-])S(=O)(=O)C)[N+](=O)[O-]	1	3	3	2	Moderate	3.7208	In	10	0.3849	0.576347
1266	Oryzalin	CCCN(CCC)C1=C(C=C(C=C1[N+](=O)[O-])S(=O)(=O)N)[N+](=O)[O-]	1	3	3	2	Moderate	3.7208	In	10	0.3849	0.576347
1501	Sodium monochloroacetate	C(C(=O)[O-])Cl	1	3	2	1	Bad/Unreliable	3.71793	In	38	0.0181655	0
1526	Sulfosulfuron	CCS(=O)(=O)C1=C(N2C=CC=CC2=N1)S(=O)(=O)NC(=O)NC3=NC(=CC(=N3)OC)OC	1	3	2	1	Bad/Unreliable	3.71569	In	38	0.0162754	0
1471	Rimsulfuron	CCS(=O)(=O)C1=C(N=CC=C1)S(=O)(=O)NC(=O)NC2=NC(=CC(=N2)OC)OC	1	3	2	1	Bad/Unreliable	3.71559	In	38	0.0161989	0
710	Famoxadone	CC1(C(=O)N(C(=O)O1)NC2=CC=CC=C2)C3=CC=C(C=C3)OC4=CC=CC=C4	1	3	2	1	Bad/Unreliable	3.71489	In	38	0.0156085	0
490	Daminozide	CN(C)NC(=O)CCC(=O)O	1	3	2	1	Bad/Unreliable	3.7138	In	38	0.0146891	0
1642	Tricamba	COc1c(Cl)cc(Cl)c(Cl)c1C(=O)O	1	3	2	1	Bad/Unreliable	3.71378	In	38	0.0146703	0
863	Flurenol	C1=CC=C2C(=C1)C3=CC=CC=C3C2(C(=O)O)O	1	3	2	1	Bad/Unreliable	3.71324	In	38	0.0142173	0
806	Fluchloraminopyr	CC(C(=O)O)OC1=NC(=C(C(=C1Cl)N)Cl)F	1	3	2	1	Bad/Unreliable	3.712	In	38	0.0131759	0
867	Fluroxypyr	C(C(=O)O)OC1=NC(=C(C(=C1Cl)N)Cl)F	1	3	2	1	Bad/Unreliable	3.71	In	38	0.0114982	0
360	Chlorophacinone	C1=CC=C(C=C1)C(C2=CC=C(C=C2)Cl)C(=O)C3C(=O)C4=CC=CC=C4C3=O	1	3	2	1	Bad/Unreliable	3.70957	In	38	0.0111343	0
180	Benthiavalicarb-isopropyl	CC(C)C(C(=O)NC(C)C1=NC2=C(S1)C=C(C=C2)F)NC(=O)OC(C)C	1	3	3	2	Moderate	3.70741	In	38	0.14732	0
161	Benazolin-ethyl	CCOC(=O)CN1C2=C(C=CC=C2Cl)SC1=O	1	3	3	2	Moderate	3.7072	In	4	0.204195	0.490641
718	Fenazaflor	C1=CC=C(C=C1)OC(=O)N2C3=CC(=C(C=C3N=C2C(F)(F)F)Cl)Cl	1	3	2	1	Bad/Unreliable	3.70705	In	38	0.00902112	0
723	Fenchlorazole-ethyl	C1=CC=C(C=C1)OC(=O)N2C3=CC(=C(C=C3N=C2C(F)(F)F)Cl)Cl	1	3	2	1	Bad/Unreliable	3.70705	In	38	0.00902112	0
112	Aminopyralid	C1=C(C(=C(N=C1Cl)C(=O)O)Cl)N	1	3	2	1	Bad/Unreliable	3.70697	In	38	0.00894927	0
113	Aminopyralid-dimethylammonium	NC1=CC(Cl)=NC(C(O)=O)=C1Cl	1	3	2	1	Bad/Unreliable	3.70697	In	38	0.00894927	0
1465	Quintrione	C1CC(=O)C(C(=O)C1)C(=O)C2=C(C=CC3=CC(=CN=C32)Cl)Cl	1	3	2	1	Bad/Unreliable	3.70596	In	38	0.00810671	0
1673	Tripyrasulfone	CC1=CC(=NN1CC2=C(C=CC(=C2Cl)C(=O)C3=C(N(N=C3C)C)OC(=O)C4=CN(N=C4C)C)S(=O)(=O)C)C	1	3	2	1	Bad/Unreliable	3.70224	In	38	0.00497808	0
1562	Tetflupyrolimet	CN1C[C@@H]([C@H](C1=O)C(=O)NC2=CC=CC=C2F)C3=CC(=CC=C3)C(F)(F)F	1	3	2	1	Bad/Unreliable	3.69855	In	38	0.00187358	0
730	Fenitropan	CC(=O)OCC(C(C1=CC=CC=C1)OC(=O)C)[N+](=O)[O-]	1	3	2	1	Bad/Unreliable	3.69731	In	38	0.000834	0
883	Fomesafen	CS(=O)(=O)NC(=O)C1=C(C=CC(=C1)OC2=C(C=C(C=C2)C(F)(F)F)Cl)[N+](=O)[O-]	1	3	2	1	Bad/Unreliable	3.69657	In	38	0.000214	0
1595	Thiophanate-methyl	COC(=O)NC(=S)NC1=CC=CC=C1NC(=S)NC(=O)OC	1	3	2	1	Bad/Unreliable	3.69632	In	38	0	NaN
1569	Tetraniliprole	CC1=CC(=CC(=C1NC(=O)C2=CC(=NN2C3=C(C=CC=N3)Cl)CN4N=C(N=N4)C(F)(F)F)C(=O)NC)C#N	1	3	2	1	Bad/Unreliable	3.69377	In	38	0.00213943	#NAME?
1220	Myclozolin	CC1(C(=O)N(C(=O)O1)C2=CC(=CC(=C2)Cl)Cl)COC	1	3	2	1	Bad/Unreliable	3.69154	In	38	0.0040139	#NAME?
349	Chlorflurenol	C1=CC=C2C(=C1)C3=C(C2(C(=O)O)O)C=C(C=C3)Cl	1	3	2	1	Bad/Unreliable	3.6897	In	38	0.0055574	#NAME?
1326	Picloram	C1(=C(C(=NC(=C1Cl)Cl)C(=O)O)Cl)N	1	3	2	1	Bad/Unreliable	3.68343	In	38	0.0108254	#NAME?
1657	Trifloxysulfuron	COC1=CC(=NC(=N1)NC(=O)NS(=O)(=O)C2=C(C=CC=N2)OCC(F)(F)F)OC	1	3	2	1	Bad/Unreliable	3.68242	In	38	0.0116764	#NAME?
892	Fosamine	CCOP(=O)(C(=O)N)O	1	3	2	1	Bad/Unreliable	3.68107	In	38	0.0128107	#NAME?
420	Cloxyfonac-sodium	C1=CC(=C(C=C1Cl)CO)OCC(=O)[O-]	1	3	2	1	Bad/Unreliable	3.68087	In	38	0.0129819	#NAME?
1155	Methazole	CN1C(=O)N(OC1=O)C2=CC(=C(C=C2)Cl)Cl	1	3	2	1	Bad/Unreliable	3.67912	In	38	0.014451	#NAME?
362	Chloropon	C(C(C(=O)O)(Cl)Cl)Cl	1	3	2	1	Bad/Unreliable	3.67767	In	38	0.0156685	#NAME?
217	Bispyribac	COC1=CC(=NC(=N1)OC2=C(C(=CC=C2)OC3=NC(=CC(=N3)OC)OC)C(=O)O)OC	1	3	2	1	Bad/Unreliable	3.67747	In	38	0.01584	#NAME?
1108	Mecarbinzid	COC(=O)NC1=NC2=CC=CC=C2N1C(=O)NCCSC	1	3	3	2	Moderate	3.67627	In	38	0.126885	0
484	Cyprosulfamide	COC1=CC=CC=C1C(=O)NS(=O)(=O)C2=CC=C(C=C2)C(=O)NC3CC3	1	2	3	2	Moderate	3.67024	In	38	0.123175	0
1627	Triafamone	CN(C1=C(C=CC=C1F)C(=O)C2=NC(=NC(=N2)OC)OC)S(=O)(=O)C(F)F	1	2	3	2	Moderate	3.66118	In	38	0.117797	0
167	Benfuracarb	CCOC(=O)CCN(C(C)C)SN(C)C(=O)OC1=CC=CC2=C1OC(C2)(C)C	1	2	3	2	Moderate	3.65797	In	4	0.225497	0.402698
1148	Metcamifen	CNC(=O)NC1=CC=C(C=C1)S(=O)(=O)NC(=O)C2=CC=CC=C2OC	1	2	2	1	Bad/Unreliable	3.58542	In	38	0.0870512	0
457	Cyclosulfamuron	COC1=CC(=NC(=N1)NC(=O)NS(=O)(=O)NC2=CC=CC=C2C(=O)C3CC3)OC	1	2	2	1	Bad/Unreliable	3.57876	In	38	0.0860927	0
106	Amidosulfuron	CN(S(=O)(=O)C)S(=O)(=O)NC(=O)NC1=NC(=CC(=N1)OC)OC	1	2	2	1	Bad/Unreliable	3.56973	In	38	0.0853619	0
105	Amidoflumet	COC(=O)C1=C(C=CC(=C1)Cl)NS(=O)(=O)C(F)(F)F	1	2	3	2	Moderate	3.54229	In	38	0.193836	0

## Sheet: PPDB_M2
TestCompNo	Chemical name	SMILE	Score(MAE-LOO)	Score(Proximity Train YObs Mean)	Score(Similarity based AD)	CompositeScore	PredictionQuality	YPred(Test)	AD status	Closest Training Compound	Euclidean Distance	Generalized Jaccard Coeff.
1377	Propetamphos	CCNP(=S)(OC)OC(=CC(=O)OC(C)C)C	1	2	3	3	Good	6.24847	In	29	0.500891	0.616026
1430	Pyridafenthion	CCOP(=S)(OCC)OC1=NN(C(=O)C=C1)C2=CC=CC=C2	1	2	3	3	Good	6.24843	In	29	0.500888	0.616037
413	Cloproxydim	CCCC(=C1C(=O)CC(CC1=O)CC(C)SCC)NOCC=CCl	1	3	3	3	Good	6.05937	In	29	0.353533	0.712573
1428	Pyridaben	CC(C)(C)C1=CC=C(C=C1)CSC2=C(C(=O)N(N=C2)C(C)(C)C)Cl	1	3	3	3	Good	6.02982	In	29	0.332967	0.724691
107	Amidothioate	CCNP(=S)(OC)OC1=C(C=C(C=C1)SC)Cl	1	3	3	3	Good	6.02874	In	23	0	1
761	Fensulfothion	CCOP(=S)(OCC)OC1=CC=C(C=C1)S(=O)C	1	3	3	3	Good	6.02874	In	23	0	1
764	Fenthion	CC1=C(C=CC(=C1)OP(=S)(OC)OC)SC	1	3	3	3	Good	6.02874	In	23	0	1
765	Fenthion sulfoxide	CC1=C(C=CC(=C1)OP(=S)(OC)OC)S(=O)C	1	3	3	3	Good	6.02874	In	23	0	1
766	Fenthion-ethyl	CCOP(=S)(OCC)OC1=CC(=C(C=C1)SC)C	1	3	3	3	Good	6.02874	In	23	0	1
1532	Sulprofos	CCCSP(=S)(OCC)OC1=CC=C(C=C1)SC	1	3	3	3	Good	6.02874	In	23	0	1
1551	Temephos	COP(=S)(OC)OC1=CC=C(C=C1)SC2=CC=C(C=C2)OP(=S)(OC)OC	1	3	3	3	Good	6.02874	In	23	0	1
398	Clethodim	CCC(=C1C(=O)CC(CC1=O)CC(C)SCC)NOCC=CCl	1	3	3	3	Good	6.02175	In	29	0.327348	0.728073
1678	Uniconazole	CC(C)(C)C(C(=CC1=CC=C(C=C1)Cl)N2C=NC=N2)O	1	3	3	3	Good	6.00247	In	29	0.31392	0.736286
602	Diniconazole	CC(C)(C)C(C(=CC1=C(C=C(C=C1)Cl)Cl)N2C=NC=N2)O	1	3	3	3	Good	5.96342	In	29	0.286738	0.753492
603	Diniconazole-M	CC(C)(C)C(C(=CC1=C(C=C(C=C1)Cl)Cl)N2C=NC=N2)O	1	3	3	3	Good	5.96342	In	29	0.286738	0.753492
237	Bromocyclen	C1C(C2(C(=C(C1(C2(Cl)Cl)Cl)Cl)Cl)Cl)CBr	1	3	3	3	Good	5.92834	In	29	0.262317	0.769651
964	Hymexazol	CC1=CC(=O)NO1	1	3	3	3	Good	5.87804	In	29	0.227295	0.794072
713	Fenaminstrobin	CC(=NOCC1=CC=CC=C1C(=NOC)C(=O)NC)C=CC2=C(C=CC=C2Cl)Cl	1	3	3	3	Good	5.86852	In	29	0.220669	0.798867
247	Brompyrazon	C1=CC=C(C=C1)N2C(=O)C(=C(C=N2)N)Br	1	3	3	3	Good	5.86734	In	29	0.219848	0.799466
329	Chlordane	C1C2C(C(C1Cl)Cl)C3(C(=C(C2(C3(Cl)Cl)Cl)Cl)Cl)Cl	1	3	3	3	Good	5.85817	In	29	0.213463	0.804149
230	Bromacil	CCC(C)N1C(=O)C(=C(NC1=O)C)Br	1	3	3	3	Good	5.85694	In	29	0.212609	0.80478
231	Bromacil-dimethylammonium	CCC(C)N1C(=O)NC(C)=C(Br)C1=O	1	3	3	3	Good	5.85694	In	29	0.212609	0.80478
549	Diclomezine	CC1=C(C=C(C=C1Cl)C2=NNC(=O)C=C2)Cl	1	3	3	3	Good	5.85406	In	29	0.210598	0.806268
1022	Isocil	CC1=C(C(=O)N(C(=O)N1)C(C)C)Br	1	3	3	3	Good	5.82971	In	29	0.193652	0.819036
326	Chlorbicyclen	C(C1C(C2(C(=C(C1(C2(Cl)Cl)Cl)Cl)Cl)Cl)CCl)Cl	1	3	3	3	Good	5.82081	In	29	0.187453	0.823808
94	Alpha-endosulfan	C1C2C(COS(=O)O1)C3(C(=C(C2(C3(Cl)Cl)Cl)Cl)Cl)Cl	1	3	3	3	Good	5.76491	In	29	0.148537	0.855085
202	Beta-endosulfan	C1C2C(COS(=O)O1)C3(C(=C(C2(C3(Cl)Cl)Cl)Cl)Cl)Cl	1	3	3	3	Good	5.76491	In	29	0.148537	0.855085
651	Endosulfan	C1C2C(COS(=O)O1)C3(C(=C(C2(C3(Cl)Cl)Cl)Cl)Cl)Cl	1	3	3	3	Good	5.76491	In	29	0.148537	0.855085
1552	Tepraloxydim	CCC(=C1C(=O)CC(CC1=O)C2CCOCC2)NOCC=CCl	1	3	3	3	Good	5.75477	In	29	0.408318	0.604814
560	Dieldrin	C1C2C3C(C1C4C2O4)C5(C(=C(C3(C5(Cl)Cl)Cl)Cl)Cl)Cl	1	3	3	3	Good	5.72303	In	29	0.391052	0.614179
654	Endrin	C1C2C3C(C1C4C2O4)C5(C(=C(C3(C5(Cl)Cl)Cl)Cl)Cl)Cl	1	3	3	3	Good	5.72303	In	29	0.391052	0.614179
438	Crotamiton	CCN(C1=CC=CC=C1C)C(=O)C=CC	1	3	3	3	Good	5.67685	In	29	0.0872269	0.909486
655	Enoxastrobin	CC(=NOCC1=CC=CC=C1C(=COC)C(=O)OC)C=CC2=CC=C(C=C2)Cl	1	3	3	3	Good	5.66515	In	29	0.36092	0.632027
18	1,3-butadiene	C=CC=C	1	3	3	3	Good	5.65838	In	29	0.0743715	0.921783
588	Dimethipin	CC1=C(S(=O)(=O)CCS1(=O)=O)C	1	3	3	3	Good	5.65251	In	29	0.0702827	0.925764
857	Flupyradifurone	C1C(=CC(=O)O1)N(CC2=CN=C(C=C2)Cl)CC(F)F	1	3	3	3	Good	5.6249	In	29	0.0510642	0.944946
86	Allidochlor	C=CCN(CC=C)C(=O)CCl	1	3	3	3	Good	5.61209	In	29	0.0421405	0.954125
556	Dicrotophos	CC(=CC(=O)N(C)C)OP(=O)(OC)OC	1	3	3	3	Good	5.60528	In	29	0.0374048	0.95907
391	Cinidon-ethyl	CCOC(=O)C(=CC1=C(C=CC(=C1)N2C(=O)C3=C(C2=O)CCCC3)Cl)Cl	1	3	3	3	Good	5.58606	In	29	0.0240186	0.973327
1207	Monocrotophos	C/C(=C\C(=O)NC)/OP(=O)(OC)OC	1	3	3	3	Good	5.55156	In	29	0	1
351	Chloridazon	C1=CC=C(C=C1)N2C(=O)C(=C(C=N2)N)Cl	1	3	3	3	Good	5.54119	In	29	0.00721992	0.991762
1018	Isobenzan	C12C(C(OC1Cl)Cl)C3(C(=C(C2(C3(Cl)Cl)Cl)Cl)Cl)Cl	1	3	3	3	Good	5.50245	In	29	0.28978	0.688242
530	Dichlormid	C=CCN(CC=C)C(=O)C(Cl)Cl	1	3	3	3	Good	5.49541	In	29	0.0390914	0.955399
1163	Methocrotophos	CC(=CC(=O)N(C)OC)OP(=O)(OC)OC	1	3	3	3	Good	5.47499	In	29	0.0533023	0.939185
1482	Sethoxydim	CCCC(=C1C(=O)CC(CC1=O)CC(C)SCC)NOCC	1	3	2	2	Moderate	5.46094	In	6	0.346897	0.700729
1554	Terbacil	CC1=C(C(=O)N(C(=O)N1)C(C)(C)C)Cl	1	3	3	3	Good	5.45705	In	28	0.0439827	0.944975
569	Difenopenten-ethyl	CCOC(=O)C=CC(C)OC1=CC=C(C=C1)OC2=CC=C(C=C2)C(F)(F)F	1	3	3	3	Good	5.43672	In	28	0.0300273	0.961766
90	Allyxycarb	CC1=CC(=CC(=C1N(CC=C)CC=C)C)OC(=O)NC	1	3	3	3	Good	5.42138	In	28	0.0194967	0.974837
477	Cyphenothrin	CC(=CC1C(C1(C)C)C(=O)OC(C#N)C2=CC(=CC=C2)OC3=CC=CC=C3)C	1	3	2	2	Moderate	5.40318	In	6	0.302185	0.728842
290	Captan	C1C=CCC2C1C(=O)N(C2=O)SC(Cl)(Cl)Cl	1	3	3	3	Good	5.4006	In	28	0.00522834	0.993126
714	Fenamiphos	CCOP(=O)(NC(C)C)OC1=CC(=C(C=C1)SC)C	1	3	3	3	Good	5.40033	In	19	0	1
1373	Propaphos	CCCOP(=O)(OCCC)OC1=CC=C(C=C1)SC	1	3	3	3	Good	5.40033	In	19	0	1
1360	Profoxydim	CCCC(=C1C(=O)CC(CC1=O)C2CCCSC2)NOCC(C)OC3=CC=C(C=C3)Cl	1	3	2	2	Moderate	5.39602	In	6	0.296645	0.732484
1198	Mevinphos	CC(=CC(=O)OC)OP(=O)(OC)OC	1	3	3	3	Good	5.39298	In	28	0	1
1250	Norflurazon	CNC1=C(C(=O)N(N=C1)C2=CC=CC(=C2)C(F)(F)F)Cl	1	3	3	3	Good	5.38946	In	34	0.0019651	0.997388
1321	Phosphamidon	CCN(CC)C(=O)C(=C(C)OP(=O)(OC)OC)Cl	1	3	3	3	Good	5.38659	In	34	0	1
1055	Kadethrin	CC1(C(C1C(=O)OCC2=COC(=C2)CC3=CC=CC=C3)C=C4CCSC4=O)C	1	3	3	3	Good	5.38405	In	6	0.287375	0.738659
289	Captafol	C1C=CCC2C1C(=O)N(C2=O)SC(C(Cl)Cl)(Cl)Cl	1	3	3	3	Good	5.37554	In	34	0.0075833	0.989894
1080	Maleic hydrazide	C1=CC(=O)NNC1=O	1	3	3	3	Good	5.3526	In	34	0.0233153	0.968927
1082	Maleic hydrazide potassium	C1=CC(=O)NNC1=O	1	3	3	3	Good	5.3526	In	34	0.0233153	0.968927
1616	Tralkoxydim	CCC(=C1C(=O)CC(CC1=O)C2=C(C=C(C=C2C)C)C)NOCC	1	3	3	3	Good	5.34079	In	6	0.253893	0.761857
1359	Profluthrin	CC=CC1C(C1(C)C)C(=O)OCC2=C(C(=C(C(=C2F)F)C)F)F	1	3	3	3	Good	5.33338	In	34	0.0364988	0.951357
263	Butenachlor	CCC1=C(C(=CC=C1)CC)N(COCC=CC)C(=O)CCl	1	3	3	3	Good	5.33027	In	29	0.250857	0.759757
875	Flutianil	COC1=CC=CC=C1N2CCSC2=C(C#N)SC3=C(C=CC(=C3)C(F)(F)F)F	1	3	3	3	Good	5.32379	In	6	0.240733	0.771378
272	Butroxydim	CCCC(=O)C1=C(C(=C(C=C1C)C)C2CC(=O)C(=C(CC)NOCC)C(=O)C2)C	1	3	3	3	Good	5.28016	In	6	0.206954	0.796944
759	Fenridazon-propyl	CCCOC(=O)C1=NN(C(=CC1=O)C)C2=CC=C(C=C2)Cl	1	3	3	3	Good	5.27862	In	34	0.0740581	0.901301
606	Dinocap	CCCCCCC(C)C1=CC(=CC(=C1OC(=O)C=CC)[N+](=O)[O-])[N+](=O)[O-]	1	3	3	3	Good	5.27258	In	34	0.0782018	0.895779
1132	Meptyldinocap	CCCCCCC(C)C1=CC(=CC(=C1OC(=O)C=CC)[N+](=O)[O-])[N+](=O)[O-]	1	3	3	3	Good	5.27258	In	34	0.0782018	0.895779
1081	Maleic hydrazide choline	C[N+](C)(C)CCO.C1=CC(=NNC1=O)[O-]	1	3	3	3	Good	5.26098	In	34	0.0861573	0.885176
927	Griseofulvin	CC1CC(=O)C=C(C12C(=O)C3=C(O2)C(=C(C=C3OC)OC)Cl)OC	1	3	3	3	Good	5.25123	In	29	0.250786	0.754391
1223	N1,N2-diallyl-N2-dichloroacetylglycinamide	C=CCNC(=O)CN(CC=C)C(=O)C(Cl)Cl	1	3	3	3	Good	5.24306	In	34	0.0984455	0.8688
514	Di-allate	CC(C)N(C(C)C)C(=O)SCC(=CCl)Cl	1	3	3	3	Good	5.23861	In	6	0.174793	0.822911
190	Benzobicyclon	CS(=O)(=O)C1=CC(=C(C=C1)C(=O)C2=C(C3CCC(C3)C2=O)SC4=CC=CC=C4)Cl	1	3	3	3	Good	5.21568	In	6	0.15704	0.837983
1431	Pyridafol	C1=CC=C(C=C1)C2=NNC(=CC2=O)Cl	1	3	3	3	Good	5.1989	In	6	0.144054	0.849363
500	Deltamethrin	CC1(C(C1C(=O)OC(C#N)C2=CC(=CC=C2)OC3=CC=CC=C3)C=C(Br)Br)C	1	3	3	3	Good	5.19175	In	6	0.138514	0.854311
87	Alloxydim	CCCC(=C1C(=O)CC(C(C1=O)C(=O)OC)(C)C)NOCC=C	1	3	3	3	Good	5.16588	In	34	0.151382	0.79825
984	Imicyafos	CCCSP(=O)(N1CCN(C1=NC#N)CC)OCC	1	3	3	3	Good	5.15458	In	21	0.230912	0.849398
1443	Pyrimorph	CC(C)(C)C1=CC=C(C=C1)C(=CC(=O)N2CCOCC2)C3=CC(=NC=C3)Cl	1	3	2	2	Moderate	5.13156	In	6	0.404207	0.587039
1628	Tri-allate	CC(C)N(C(C)C)C(=O)SCC(=C(Cl)Cl)Cl	1	3	3	3	Good	5.12366	In	6	0.0858082	0.904451
568	Difenopenten	CC(C=CC(=O)O)OC1=CC=C(C=C1)OC2=CC=C(C=C2)C(F)(F)F	1	3	3	3	Good	5.12075	In	34	0.182341	0.75699
591	Dimethomorph	COC1=C(C=C(C=C1)C(=CC(=O)N2CCOCC2)C3=CC=C(C=C3)Cl)OC	1	3	3	3	Good	5.09151	In	6	0.382236	0.600494
234	Bromfenvinfos	CCOP(=O)(OCC)OC(=CBr)C1=C(C=C(C=C1)Cl)Cl	1	3	3	3	Good	5.08955	In	6	0.0594065	0.931846
1458	Quinoclamine	C1=CC=C2C(=C1)C(=O)C(=C(C2=O)Cl)N	1	3	3	3	Good	5.08452	In	34	0.20719	0.723873
269	Butopyronoxyl	CCCCOC(=O)C1=CC(=O)CC(O1)(C)C	1	3	3	3	Good	5.0826	In	34	0.24736	0.723964
1513	Spiromesifen	CC1=CC(=C(C(=C1)C)C2=C(C3(CCCC3)OC2=O)OC(=O)CC(C)(C)C)C	1	3	3	3	Good	5.07502	In	6	0.0481556	0.944031
662	Epsilon-metofluthrin	C/C=C\[C@@H]1[C@H](C1(C)C)C(=O)OCC2=C(C(=C(C(=C2F)F)COC)F)F	1	3	3	3	Good	5.06289	In	34	0.249322	0.710395
1185	Metofluthrin	CC=CC1C(C1(C)C)C(=O)OCC2=C(C(=C(C(=C2F)F)COC)F)F	1	3	3	3	Good	5.06289	In	34	0.249322	0.710395
1314	Phosacetim	CC(=NP(=S)(OC1=CC=C(C=C1)Cl)OC2=CC=C(C=C2)Cl)N	1	3	3	3	Good	5.05632	In	21	0.137216	0.904682
461	Cyenopyrafen	CC1=C(N(N=C1C)C)C(=C(C#N)C2=CC=C(C=C2)C(C)(C)C)OC(=O)C(C)(C)C	1	3	3	3	Good	5.05366	In	6	0.0316215	0.962528
1259	Octhilinone	CCCCCCCCN1C(=O)C=CS1	1	3	3	3	Good	5.05039	In	6	0.029094	0.965419
344	Chlorfenvinphos	CCOP(=O)(OCC)OC(=CCl)C1=C(C=C(C=C1)Cl)Cl	1	3	3	3	Good	5.01281	In	6	0	1
1432	Pyridalyl	C1=CC(=NC=C1C(F)(F)F)OCCCOC2=C(C=C(C=C2Cl)OCC=C(Cl)Cl)Cl	1	3	3	3	Good	5.01154	In	6	0.000984	0.998789
1180	Methylisothiazoline	CN1C(=O)C=CS1	1	3	3	3	Good	5.00878	In	6	0.00311581	0.996164
832	Flumorph	COC1=C(C=C(C=C1)C(=CC(=O)N2CCOCC2)C3=CC=C(C=C3)F)OC	1	3	3	3	Good	5.00586	In	6	0.340004	0.631445
596	Dimethylvinphos	COP(=O)(OC)OC(=CCl)C1=C(C=C(C=C1)Cl)Cl	1	3	3	3	Good	5.00191	In	6	0.00843814	0.989611
1316	Phosametine	CN(C(=O)CNCP(=O)(O)O)S(=O)(=O)C	1	3	3	3	Good	5.0014	In	19	0.35153	0.707907
1085	Malonoben	CC(C)(C)C1=CC(=CC(=C1O)C(C)(C)C)C=C(C#N)C#N	1	3	3	3	Good	4.99958	In	6	0.0102416	0.987391
1280	Oxycarboxin	CC1=C(S(=O)(=O)CCO1)C(=O)NC2=CC=CC=C2	1	3	3	3	Good	4.99805	In	34	0.260668	0.665742
1337	Piperophos	CCCOP(=S)(OCCC)SCC(=O)N1CCCCC1C	1	3	3	3	Good	4.99776	In	21	0.0813731	0.941192
1488	Silthiofam	CC1=C(SC(=C1C(=O)NCC=C)[Si](C)(C)C)C	1	3	3	3	Good	4.9943	In	6	0.0143273	0.982361
432	Coumatetralyl	C1CC(C2=CC=CC=C2C1)C3=C(C4=CC=CC=C4OC3=O)O	1	3	3	3	Good	4.98403	In	6	0.0222813	0.972568
754	Fenpyrazamine	CC1=CC=CC=C1C2=C(N(N(C2=O)C(C)C)C(=O)SCC=C)N	1	3	3	3	Good	4.98355	In	6	0.0226463	0.972119
1323	Phoxim	CCOP(=S)(OCC)ON=C(C#N)C1=CC=CC=C1	1	3	3	3	Good	4.98019	In	21	0.0646207	0.952727
19	1,3-dichloropropene	C=CC(Cl)Cl	1	3	3	3	Good	4.9712	In	6	0.0322129	0.960341
45	2-allyphenol	C=CCC1=CC=CC=C1O	1	3	3	3	Good	4.9712	In	6	0.0322129	0.960341
74	Acrolein	C=CC=O	1	3	3	3	Good	4.9712	In	6	0.0322129	0.960341
75	Acrylonitrile	C=CC#N	1	3	3	3	Good	4.9712	In	6	0.0322129	0.960341
89	Allyl alcohol	C=CCO	1	3	3	3	Good	4.9712	In	6	0.0322129	0.960341
1338	Piproctanyl	CC(C)CCCC(C)CC[N+]1(CCCCC1)CC=C	1	3	3	3	Good	4.9712	In	6	0.0322129	0.960341
1563	Tetrachlorvinphos	COP(=O)(OC)OC(=CCl)C1=CC(=C(C=C1Cl)Cl)Cl	1	3	3	3	Good	4.96286	In	6	0.0386627	0.9524
210	Biopermethrin	CC1(C(C1C(=O)OCC2=CC(=CC=C2)OC3=CC=CC=C3)C=C(Cl)Cl)C	1	3	3	3	Good	4.94505	In	6	0.0524531	0.935422
396	Cis-permethrin	CC1(C(C1C(=O)OCC2=CC(=CC=C2)OC3=CC=CC=C3)C=C(Cl)Cl)C	1	3	3	3	Good	4.94505	In	6	0.0524531	0.935422
1302	Permethrin	CC1(C(C1C(=O)OCC2=CC(=CC=C2)OC3=CC=CC=C3)C=C(Cl)Cl)C	1	3	3	3	Good	4.94505	In	6	0.0524531	0.935422
1622	Transpermethrin	CC1(C)C(C=C(Cl)Cl)C1C(=O)OCC1=CC(OC2=CC=CC=C2)=CC=C1	1	3	3	3	Good	4.94505	In	6	0.0524531	0.935422
566	Difenacoum	C1C(CC2=CC=CC=C2C1C3=C(C4=CC=CC=C4OC3=O)O)C5=CC=C(C=C5)C6=CC=CC=C6	1	3	3	3	Good	4.93575	In	6	0.0596503	0.926561
227	Brodifacoum	C1C(CC2=CC=CC=C2C1C3=C(C4=CC=CC=C4OC3=O)O)C5=CC=C(C=C5)C6=CC=C(C=C6)Br	1	3	3	3	Good	4.93007	In	6	0.0640518	0.921142
208	Binapacryl	CCC(C)C1=CC(=CC(=C1OC(=O)C=C(C)C)[N+](=O)[O-])[N+](=O)[O-]	1	3	3	3	Good	4.92711	In	6	0.0663434	0.918321
373	Chlorphoxim	CCOP(=S)(OCC)ON=C(C#N)C1=CC=CC=C1Cl	1	3	3	3	Good	4.92146	In	21	0.00861623	0.993428
894	Fosmethilan	CCCC(=O)N(CSP(=S)(OC)OC)C1=CC=CC=C1Cl	1	3	3	3	Good	4.91565	In	21	0.00307179	0.997647
115	Amiprofos-methyl	CC1=CC(=C(C=C1)OP(=S)(NC(C)C)OC)[N+](=O)[O-]	1	3	3	3	Good	4.91242	In	21	0	1
117	Amiton	CCN(CC)CCSP(=O)(OCC)OCC	1	3	3	3	Good	4.91242	In	21	0	1
134	Aspon	CCCOP(=S)(OCCC)OP(=S)(OCCC)OCCC	1	3	3	3	Good	4.91242	In	21	0	1
151	Azothoate	COP(=S)(OC)OC1=CC=C(C=C1)N=NC2=CC=C(C=C2)Cl	1	3	3	3	Good	4.91242	In	21	0	1
175	Bensulide	CC(C)OP(=S)(OC(C)C)SCCNS(=O)(=O)C1=CC=CC=C1	1	3	3	3	Good	4.91242	In	21	0	1
240	Bromophos	COP(=S)(OC)OC1=CC(=C(C=C1Cl)Br)Cl	1	3	3	3	Good	4.91242	In	21	0	1
241	Bromophos-ethyl	CCOP(=S)(OCC)OC1=CC(=C(C=C1Cl)Br)Cl	1	3	3	3	Good	4.91242	In	21	0	1
259	Butamifos	CCC(C)NP(=S)(OCC)OC1=C(C=CC(=C1)C)[N+](=O)[O-]	1	3	3	3	Good	4.91242	In	21	0	1
262	Butathiofos	CCOP(=S)(OCC)OC1=CN=C(N=C1)C(C)(C)C	1	3	3	3	Good	4.91242	In	21	0	1
277	Cadusafos	CCC(C)SP(=O)(OCC)SC(C)CC	1	3	3	3	Good	4.91242	In	21	0	1
301	Carbophenothion	CCOP(=S)(OCC)SCSC1=CC=C(C=C1)Cl	1	3	3	3	Good	4.91242	In	21	0	1
334	Chlorethoxyfos	CCOP(=S)(OCC)OC(C(Cl)(Cl)Cl)Cl	1	3	3	3	Good	4.91242	In	21	0	1
355	Chlormephos	CCOP(=S)(OCC)SCCl	1	3	3	3	Good	4.91242	In	21	0	1
374	Chlorprazophos	CCOP(=S)(OCC)OC1=NN2C(=CC=NC2=C1Cl)C	1	3	3	3	Good	4.91242	In	21	0	1
377	Chlorpyrifos	CCOP(=S)(OCC)OC1=NC(=C(C=C1Cl)Cl)Cl	1	3	3	3	Good	4.91242	In	21	0	1
378	Chlorpyrifos-methyl	COP(=S)(OC)OC1=NC(=C(C=C1Cl)Cl)Cl	1	3	3	3	Good	4.91242	In	21	0	1
385	Chlorthion	COP(=S)(OC)OC1=CC(=C(C=C1)[N+](=O)[O-])Cl	1	3	3	3	Good	4.91242	In	21	0	1
386	Chlorthiophos	CCOP(=S)(OCC)OC1=CC(=C(C=C1Cl)Cl)SC	1	3	3	3	Good	4.91242	In	21	0	1
443	Cyanophos	COP(=S)(OC)OC1=CC=C(C=C1)C#N	1	3	3	3	Good	4.91242	In	21	0	1
501	Demephion	COP(=O)(OC)SCCSC	1	3	3	3	Good	4.91242	In	21	0	1
502	Demephion-O	COP(=S)(OC)OCCSC	1	3	3	3	Good	4.91242	In	21	0	1
503	Demeton	CCOP(=S)(OCC)OCCSCC	1	3	3	3	Good	4.91242	In	21	0	1
504	Demeton-O-methyl	CCSCCOP(=S)(OC)OC	1	3	3	3	Good	4.91242	In	21	0	1
505	Demeton-O-methyl sulfone	CCS(=O)(=O)CCOP(=S)(OC)OC	1	3	3	3	Good	4.91242	In	21	0	1
506	Demeton-S-methyl	CCSCCSP(=O)(OC)OC	1	3	3	3	Good	4.91242	In	21	0	1
507	Demeton-S-methyl sulfone	CCS(=O)(=O)CCSP(=O)(OC)OC	1	3	3	3	Good	4.91242	In	21	0	1
518	Diazinon	CCOP(=S)(OCC)OC1=NC(=NC(=C1)C)C(C)C	1	3	3	3	Good	4.91242	In	21	0	1
527	Dichlofenthion	CCOP(=S)(OCC)OC1=C(C=C(C=C1)Cl)Cl	1	3	3	3	Good	4.91242	In	21	0	1
564	Dietholate	CCOP(=S)(OCC)OC1=CC=CC=C1	1	3	3	3	Good	4.91242	In	21	0	1
617	Dioxabenzophos	COP1(=S)OCC2=CC=CC=C2O1	1	3	3	3	Good	4.91242	In	21	0	1
632	Disulfoton	CCOP(=S)(OCC)SCCSCC	1	3	3	3	Good	4.91242	In	21	0	1
633	Disulfoton sulfoxide	CCOP(=S)(OCC)SCCS(=O)CC	1	3	3	3	Good	4.91242	In	21	0	1
647	Edifenphos	CCOP(=O)(SC1=CC=CC=C1)SC2=CC=CC=C2	1	3	3	3	Good	4.91242	In	21	0	1
656	EPBP	S=P(OC1=CC=C(Cl)C=C1Cl)(OCC)C=2C=CC=CC2	1	3	3	3	Good	4.91242	In	21	0	1
658	EPN	CCOP(=S)(C1=CC=CC=C1)OC2=CC=C(C=C2)[N+](=O)[O-]	1	3	3	3	Good	4.91242	In	21	0	1
670	Etaphos	CCCSP(=O)(OCC)OC1=C(C=C(C=C1)Cl)Cl	1	3	3	3	Good	4.91242	In	21	0	1
682	Ethion	CCOP(=S)(OCC)SCSP(=S)(OCC)OCC	1	3	3	3	Good	4.91242	In	21	0	1
689	Ethoprophos	CCCSP(=O)(OCC)SCCC	1	3	3	3	Good	4.91242	In	21	0	1
709	Etrimfos	CCC1=NC(=CC(=N1)OP(=S)(OC)OC)OCC	1	3	3	3	Good	4.91242	In	21	0	1
724	Fenchlorphos	COP(=S)(OC)OC1=CC(=C(C=C1Cl)Cl)Cl	1	3	3	3	Good	4.91242	In	21	0	1
731	Fenitrothion	CC1=C(C=CC(=C1)OP(=S)(OC)OC)[N+](=O)[O-]	1	3	3	3	Good	4.91242	In	21	0	1
884	Fonofos	CCOP(=S)(CC)SC1=CC=CC=C1	1	3	3	3	Good	4.91242	In	21	0	1
948	Heterophos	CCCSP(=O)(OCC)OC1=CC=CC=C1	1	3	3	3	Good	4.91242	In	21	0	1
958	Hexylthiofos	CCOP(=O)(OC1CCCCC1)SCC	1	3	3	3	Good	4.91242	In	21	0	1
996	Inezin	CCOP(=O)(C1=CC=CC=C1)SCC2=CC=CC=C2	1	3	3	3	Good	4.91242	In	21	0	1
999	Iodofenphos	COP(=S)(OC)OC1=CC(=C(C=C1Cl)I)Cl	1	3	3	3	Good	4.91242	In	21	0	1
1012	Iprobenfos	CC(C)OP(=O)(OC(C)C)SCC1=CC=CC=C1	1	3	3	3	Good	4.91242	In	21	0	1
1015	IPSP	CCS(=O)CSP(=S)(OC(C)C)OC(C)C	1	3	3	3	Good	4.91242	In	21	0	1
1017	Isazofos	CCOP(=S)(OCC)OC1=NN(C(=N1)Cl)C(C)C	1	3	3	3	Good	4.91242	In	21	0	1
1042	Isothioate	CC(C)SCCSP(=S)(OC)OC	1	3	3	3	Good	4.91242	In	21	0	1
1052	Isoxathion	CCOP(=S)(OCC)OC1=NOC(=C1)C2=CC=CC=C2	1	3	3	3	Good	4.91242	In	21	0	1
1054	Jiajizengxiaolin	COP(=S)(OC)OC1=CC=CC=C1	1	3	3	3	Good	4.91242	In	21	0	1
1071	Leptophos	COP(=S)(C1=CC=CC=C1)OC2=CC(=C(C=C2Cl)Br)Cl	1	3	3	3	Good	4.91242	In	21	0	1
1125	Menazon	COP(=S)(OC)SCC1=NC(=NC(=N1)N)N	1	3	3	3	Good	4.91242	In	21	0	1
1133	Merphos	CCCCSP(SCCCC)SCCCC	1	3	3	3	Good	4.91242	In	21	0	1
1153	Methamidophos	COP(=O)(N)SC	1	3	3	3	Good	4.91242	In	21	0	1
1160	Methiotepa	CC1CN1P(=S)(N2CC2C)N3CC3C	1	3	3	3	Good	4.91242	In	21	0	1
1281	Oxydemeton-methyl	CCS(=O)CCSP(=O)(OC)OC	1	3	3	3	Good	4.91242	In	21	0	1
1282	Oxydeprofos	CCS(=O)CC(C)SP(=O)(OC)OC	1	3	3	3	Good	4.91242	In	21	0	1
1286	Parathion-ethyl	CCOP(=S)(OCC)OC1=CC=C(C=C1)[N+](=O)[O-]	1	3	3	3	Good	4.91242	In	21	0	1
1287	Parathion-methyl	COP(=S)(OC)OC1=CC=C(C=C1)[N+](=O)[O-]	1	3	3	3	Good	4.91242	In	21	0	1
1306	Phenkapton	CCOP(=S)(OCC)SCSC1=C(C=CC(=C1)Cl)Cl	1	3	3	3	Good	4.91242	In	21	0	1
1313	Phorate	CCOP(=S)(OCC)SCSCC	1	3	3	3	Good	4.91242	In	21	0	1
1320	Phosnichlor	COP(=S)(OC)OC1=CC(=C(C=C1)Cl)[N+](=O)[O-]	1	3	3	3	Good	4.91242	In	21	0	1
1341	Pirimiphos-ethyl	CCN(CC)C1=NC(=CC(=N1)OP(=S)(OCC)OCC)C	1	3	3	3	Good	4.91242	In	21	0	1
1342	Pirimiphos-methyl	CCN(CC)C1=NC(=CC(=N1)OP(=S)(OC)OC)C	1	3	3	3	Good	4.91242	In	21	0	1
1356	Profenofos	CCCSP(=O)(OCC)OC1=C(C=C(C=C1)Br)Cl	1	3	3	3	Good	4.91242	In	21	0	1
1395	Prothiofos	CCCSP(=S)(OCC)OC1=C(C=C(C=C1)Cl)Cl	1	3	3	3	Good	4.91242	In	21	0	1
1405	Pyraclofos	CCCSP(=O)(OCC)OC1=CN(N=C1)C2=CC=C(C=C2)Cl	1	3	3	3	Good	4.91242	In	21	0	1
1454	Quinalphos	CCOP(=S)(OCC)OC1=NC2=CC=CC=C2N=C1	1	3	3	3	Good	4.91242	In	21	0	1
1461	Quinothion	CCOP(=S)(OCC)OC1=CC(=NC2=CC=CC=C21)C	1	3	3	3	Good	4.91242	In	21	0	1
1463	Quintiofos	CCOP(=S)(C1=CC=CC=C1)OC2=CC=CC3=C2N=CC=C3	1	3	3	3	Good	4.91242	In	21	0	1
1527	Sulfotep	CCOP(=S)(OCC)OP(=S)(OCC)OCC	1	3	3	3	Good	4.91242	In	21	0	1
1542	Tebupirimfos	CCOP(=S)(OC1=CN=C(N=C1)C(C)(C)C)OC(C)C	1	3	3	3	Good	4.91242	In	21	0	1
1557	Terbufos	CCOP(=S)(OCC)SCSC(C)(C)C	1	3	3	3	Good	4.91242	In	21	0	1
1592	Thiometon	CCSCCSP(=S)(OC)OC	1	3	3	3	Good	4.91242	In	21	0	1
1593	Thionazin	CCOP(=S)(OCC)OC1=NC=CN=C1	1	3	3	3	Good	4.91242	In	21	0	1
1609	Tolclofos-methyl	CC1=CC(=C(C(=C1)Cl)OP(=S)(OC)OC)Cl	1	3	3	3	Good	4.91242	In	21	0	1
1610	Tolfenpyrad	CC1=CC(=C(C(=C1)Cl)OP(=S)(OC)OC)Cl	1	3	3	3	Good	4.91242	In	21	0	1
1636	Triazophos	CCOP(=S)(OCC)OC1=NN(C=N1)C2=CC=CC=C2	1	3	3	3	Good	4.91242	In	21	0	1
1640	Tribufos	CCCCSP(=O)(SCCCC)SCCCC	1	3	3	3	Good	4.91242	In	21	0	1
1645	Trichloronate	CCOP(=S)(CC)OC1=CC(=C(C=C1Cl)Cl)Cl	1	3	3	3	Good	4.91242	In	21	0	1
1655	Trifenofos	CCCSP(=O)(OCC)OC1=C(C=C(C=C1Cl)Cl)Cl	1	3	3	3	Good	4.91242	In	21	0	1
1681	Vamidothion	CC(C(=O)NC)SCCSP(=O)(OC)OC	1	3	3	3	Good	4.91086	In	21	0.00149388	0.998853
579	Dimefluthrin	CC(=CC1C(C1(C)C)C(=O)OCC2=C(C(=C(C(=C2F)F)COC)F)F)C	1	3	3	3	Good	4.90323	In	6	0.301052	0.673012
1396	Prothoate	CCOP(=S)(OCC)SCC(=O)NC(C)C	1	3	3	3	Good	4.89534	In	21	0.0162946	0.987488
487	DAEP	CC(=O)NCCSP(=S)(OC)OC	1	3	3	3	Good	4.89304	In	21	0.018488	0.985804
129	Anilofos	CC(C)N(C1=CC=C(C=C1)Cl)C(=O)CSP(=S)(OC)OC	1	3	3	3	Good	4.89158	In	15	0.019141	0.985215
988	Imiprothrin	CC(=CC1C(C1(C)C)C(=O)OCN2C(=O)CN(C2=O)CC#C)C	1	3	3	3	Good	4.89006	In	6	0.0950221	0.883013
686	Ethoate-methyl	CCNC(=O)CSP(=S)(OC)OC	1	3	3	3	Good	4.88932	In	15	0.01696	0.986877
945	Heptafluthrin	CC1(C(C1C(=O)OCC2=C(C(=C(C(=C2F)F)COC)F)F)C=CC(F)(F)F)C	1	3	3	3	Good	4.8767	In	34	0.299009	0.582171
590	Dimethoate	CNC(=O)CSP(=S)(OC)OC	1	3	3	3	Good	4.8717	In	15	0	1
1514	Spiropidion	CCOC(=O)OC1=C(C(=O)N(C12CCN(CC2)OC)C)C3=C(C=C(C=C3C)Cl)C	1	3	3	3	Good	4.85628	In	6	0.121171	0.850819
1016	Isamidofos	CCOP(=O)(NC(C)C)SCC(=O)N(C)C1=CC=CC=C1	1	3	3	3	Good	4.85448	In	15	0.0165714	0.987007
896	Fosthiazate	CCC(C)SP(=O)(N1CCSC1=O)OCC	1	3	3	3	Good	4.85256	In	15	0.0184247	0.985554
144	Azinphos-ethyl	CCOP(=S)(OCC)SCN1C(=O)C2=CC=CC=C2N=N1	1	3	3	3	Good	4.815	In	30	0.0106806	0.99136
784	Flocoumafen	C1C(CC2=CC=CC=C2C1C3=C(C4=CC=CC=C4OC3=O)O)C5=CC=C(C=C5)OCC6=CC=C(C=C6)C(F)(F)F	1	3	3	3	Good	4.81395	In	6	0.153937	0.810479
1152	Methacrifos	CC(=COP(=S)(OC)OC)C(=O)OC	1	3	3	3	Good	4.81121	In	30	0.00698676	0.994331
145	Azinphos-methyl	COP(=S)(OC)SCN1C(=O)C2=CC=CC=C2N=N1	1	3	3	3	Good	4.80993	In	30	0.00573881	0.995339
93	Alpha-cypermethrin	CC1(C(C1C(=O)OC(C#N)C2=CC(=CC=C2)OC3=CC=CC=C3)C=C(Cl)Cl)C	1	3	3	3	Good	4.80803	In	6	0.158518	0.804839
201	Beta-cypermethrin	CC1(C(C1C(=O)OC(C#N)C2=CC(=CC=C2)OC3=CC=CC=C3)C=C(Cl)Cl)C	1	3	3	3	Good	4.80803	In	6	0.158518	0.804839
474	Cypermethrin	CC1(C(C1C(=O)OC(C#N)C2=CC(=CC=C2)OC3=CC=CC=C3)C=C(Cl)Cl)C	1	3	3	3	Good	4.80803	In	6	0.158518	0.804839
1572	Theta-cypermethrin	CC1(C(C1C(=O)OC(C#N)C2=CC(=CC=C2)OC3=CC=CC=C3)C=C(Cl)Cl)C	1	3	3	3	Good	4.80803	In	6	0.158518	0.804839
1692	Zeta-cypermethrin	CC1(C(C1C(=O)OC(C#N)C2=CC(=CC=C2)OC3=CC=CC=C3)C=C(Cl)Cl)C	1	3	3	3	Good	4.80803	In	6	0.158518	0.804839
1512	Spirodiclofen	CCC(C)(C)C(=O)OC1=C(C(=O)OC12CCCCC2)C3=C(C=C(C=C3)Cl)Cl	1	3	3	3	Good	4.80479	In	6	0.16103	0.801747
1262	Omethoate	CNC(=O)CSP(=O)(OC)OC	1	3	3	3	Good	4.80404	In	30	0	1
491	Dazomet	CN1CN(C(=S)SC1)C	1	3	2	2	Moderate	4.79526	In	10	0.41213	0.559575
1351	Probenazole	C=CCOC1=NS(=O)(=O)C2=CC=CC=C21	1	3	3	3	Good	4.78299	In	6	0.278273	0.729258
639	Dixanthogen	CCOC(=S)SSC(=S)OCC	1	3	2	2	Moderate	4.78164	In	10	0.401148	0.56622
750	Fenpirithrin	CC1(C(C1C(=O)OC(C#N)C2=NC(=CC=C2)OC3=CC=CC=C3)C=C(Cl)Cl)C	1	3	3	3	Good	4.78147	In	6	0.17908	0.779524
101	Amibuzin	CC(C)(C)C1=NN=C(N(C1=O)C)N(C)C	1	3	2	2	Moderate	4.77961	In	10	0.399517	0.567221
63	Acethion	CCOC(=O)CSP(=S)(OCC)OCC	1	3	3	3	Good	4.76965	In	30	0.0335202	0.972649
775	Ferimzone	CC1=CC=CC=C1C(=NNC2=NC(=CC(=N2)C)C)C	1	3	2	2	Moderate	4.74957	In	10	0.375299	0.582503
1392	Prothidathion	CCOP(=S)(OCC)SCN1C(=O)SC(=N1)OC(C)C	1	3	3	3	Good	4.7472	In	27	0.0261037	0.983844
890	Formothion	CN(C=O)C(=O)CSP(=S)(OC)OC	1	3	3	3	Good	4.74719	In	30	0.0554137	0.954785
1309	Phenthoate	CCOC(=O)C(C1=CC=CC=C1)SP(=S)(OC)OC	1	3	3	3	Good	4.74423	In	33	0.0577948	0.949894
1078	Lythidathion	CCOC1=NN(C(=O)S1)CSP(=S)(OC)OC	1	3	3	3	Good	4.74087	In	27	0.0204819	0.987279
200	Beta-cyfluthrin	CC1(C(C1C(=O)OC(C#N)C2=CC(=C(C=C2)F)OC3=CC=CC=C3)C=C(Cl)Cl)C	1	3	3	3	Good	4.74035	In	6	0.210912	0.740334
464	Cyfluthrin	CC1(C(C1C(=O)OC(C#N)C2=CC(=C(C=C2)F)OC3=CC=CC=C3)C=C(Cl)Cl)C	1	3	3	3	Good	4.74035	In	6	0.210912	0.740334
597	Dimexano	COC(=S)SSC(=S)OC	1	3	2	2	Moderate	4.73921	In	10	0.366944	0.587968
59	Acephate	CC(=O)NP(=O)(OC)SC	1	3	3	3	Good	4.73601	In	33	0.0498791	0.956458
1596	Thioquinox	C1=CC=C2C(=C1)N=C3C(=N2)SC(=S)S3	1	3	2	2	Moderate	4.73287	In	10	0.361833	0.591361
1345	Polyacrylamide	CNC.C=CC(=O)N.C=O	1	3	3	3	Good	4.72687	In	6	0.221344	0.72749
137	Athidathion	CCOP(=S)(OCC)SCN1C(=O)SC(=N1)OC	1	3	3	3	Good	4.72662	In	27	0.00783273	0.995097
983	Imibenconazole	C1=CC(=CC=C1CSC(=NC2=C(C=C(C=C2)Cl)Cl)CN3C=NC=N3)Cl	1	3	2	2	Moderate	4.72317	In	10	0.354018	0.596627
1182	Metiram	SC(=S)NCCNC([S-])=S	1	3	2	2	Moderate	4.72284	In	10	0.353751	0.596808
444	Cyanthoate	CCOP(=O)(OCC)SCC(=O)NC(C)(C)C#N	1	3	3	3	Good	4.71799	In	33	0.0325231	0.971172
1157	Methidathion	COC1=NN(C(=O)S1)CSP(=S)(OC)OC	1	3	3	3	Good	4.7178	In	27	0	1
967	Imazalil	C=CCOC(CN1C=CN=C1)C2=C(C=C(C=C2)Cl)Cl	1	3	3	3	Good	4.70992	In	6	0.279072	0.715985
968	Imazalil nitrate	ClC1=CC(Cl)=C(C=C1)C(CN1C=CN=C1)OCC=C	1	3	3	3	Good	4.70992	In	6	0.279072	0.715985
969	Imazalil sulfate	C=CCOC(CN1C=CN=C1)C2=C(C=C(C=C2)Cl)Cl.OS(=O)(=O)O	1	3	3	3	Good	4.70992	In	6	0.279072	0.715985
65	Acetophos	CCOC(=O)CSP(=O)(OCC)OCC	1	3	3	3	Good	4.70199	In	33	0.017114	0.98462
1318	Phosfolan	CCOP(=O)(N=C1SCCS1)OCC	1	3	3	3	Good	4.69759	In	10	0.333398	0.610982
1129	Mephosfolan	CCOP(=O)(N=C1SCC(S1)C)OCC	1	3	3	3	Good	4.69642	In	10	0.332451	0.611658
256	Buprofezin	CC(C)N1C(=NC(C)(C)C)SCN(C1=O)C2=CC=CC=C2	1	3	3	3	Good	4.69637	In	10	0.332413	0.611685
931	Halacrinate	C=CC(=O)OC1=C(C=C(C2=C1N=CC=C2)Cl)Br	1	3	3	3	Good	4.69632	In	6	0.244994	0.698373
1175	Methylacetophos	CCOC(=O)CSP(=O)(OC)OC	1	3	3	3	Good	4.6948	In	33	0.0101874	0.990788
1025	Isofenphos	CCOP(=S)(NC(C)C)OC1=CC=CC=C1C(=O)OC(C)C	1	3	3	3	Good	4.69074	In	33	0.0062821	0.994299
1026	Isofenphos-methyl	CC(C)NP(=S)(OC)OC1=CC=CC=C1C(=O)OC(C)C	1	3	3	3	Good	4.68821	In	33	0.00384045	0.996507
897	Fosthietan	CCOP(=O)(N=C1SCS1)OCC	1	3	3	3	Good	4.6882	In	10	0.325823	0.61643
232	Bromadiolone	C1=CC=C(C=C1)C(CC(C2=CC=C(C=C2)C3=CC=C(C=C3)Br)O)C4=C(C5=CC=CC=C5OC4=O)O	1	3	3	3	Good	4.68776	In	34	0.245748	0.662014
1419	Pyrazophos	CCOC(=O)C1=CN2C(=CC(=N2)OP(=S)(OCC)OCC)N=C1C	1	3	3	3	Good	4.68507	In	33	0.000816	0.999256
1216	Morphothion	COP(=S)(OC)SCC(=O)N1CCOCC1	1	3	3	3	Good	4.6848	In	27	0.0292906	0.981574
1574	Thiacloprid	C1CSC(=NC#N)N1CC2=CN=C(C=C2)Cl	1	3	3	3	Good	4.68454	In	10	0.322875	0.618577
1315	Phosalone	CCOP(=S)(OCC)SCN1C2=C(C=C(C=C2)Cl)OC1=O	1	3	3	3	Good	4.68422	In	33	0	1
1021	Isocarbophos	CC(C)OC(=O)C1=CC=CC=C1OP(=S)(N)OC	1	3	3	3	Good	4.6689	In	33	0.0147576	0.986531
516	Diammonium ethylenebis (dithiocarbamate)	C(CNC(=S)[S-])NC(=S)[S-]	1	3	3	3	Good	4.66186	In	10	0.30459	0.632234
1086	Mancopper	[S-]C(=S)NCCNC([S-])=S	1	3	3	3	Good	4.66186	In	10	0.30459	0.632234
1089	Maneb	C(CNC(=S)[S-])NC(=S)[S-]	1	3	3	3	Good	4.66186	In	10	0.30459	0.632234
1224	Nabam	C(CNC(=S)[S-])NC(=S)[S-]	1	3	3	3	Good	4.66186	In	10	0.30459	0.632234
1693	Zineb	C(CNC(=S)[S-])NC(=S)[S-]	1	3	3	3	Good	4.66186	In	10	0.30459	0.632234
1031	Isomethiozin	CC(C)C=NN1C(=O)C(=NN=C1SC)C(C)(C)C	1	3	3	3	Good	4.65983	In	10	0.302954	0.633485
1380	Propineb	CC(CNC(=S)[S-])NC(=S)[S-]	1	3	3	3	Good	4.6592	In	10	0.30245	0.633872
1435	Pyrifenox	CON=C(CC1=CN=CC=C1)C2=C(C=C(C=C2)Cl)Cl	1	3	3	3	Good	4.65621	In	10	0.300042	0.635725
1162	Methiuron	CC1=CC(=CC=C1)NC(=S)N(C)C	1	3	3	3	Good	4.65313	In	10	0.297555	0.63765
1686	Warfarin	CC(=O)CC(C1=CC=CC=C1)C2=C(C3=CC=CC=C3OC2=O)O	1	3	3	3	Good	4.63251	In	34	0.249867	0.611509
1239	Nithiazine	C1CNC(=C[N+](=O)[O-])SC1	1	3	3	3	Good	4.62759	In	10	0.276969	0.654046
62	Acetamiprid	CC(=NC#N)N(C)CC1=CN=C(C=C1)Cl	1	3	3	3	Good	4.62581	In	10	0.27553	0.655224
1515	Spirotetramat	CCOC(=O)OC1=C(C(=O)NC12CCC(CC2)OC)C3=C(C=CC(=C3)C)C	1	3	3	3	Good	4.62217	In	6	0.29474	0.653634
194	Benzovindiflupyr	CN1C=C(C(=N1)C(F)F)C(=O)NC2=CC=CC3=C2C4CCC3C4=C(Cl)Cl	1	3	3	3	Good	4.6176	In	10	0.268911	0.660696
512	Diafenthiuron	CC(C)C1=CC(=CC(=C1NC(=S)NC(C)(C)C)C(C)C)OC2=CC=CC=C2	1	3	3	3	Good	4.60963	In	10	0.262492	0.666091
1319	Phosmet	COP(=S)(OC)SCN1C(=O)C2=CC=CC=C2C1=O	1	3	3	3	Good	4.60406	In	33	0.0772043	0.929536
103	Amidithion	COCCNC(=O)CSP(=S)(OC)OC	1	3	3	3	Good	4.60199	In	27	0.102813	0.935324
573	Difethialone	C1C(CC2=CC=CC=C2C1C3=C(SC4=CC=CC=C4C3=O)O)C5=CC=C(C=C5)C6=CC=C(C=C6)Br	1	3	3	3	Good	4.60114	In	10	0.255649	0.67194
142	Azamethiphos	COP(=O)(OC)SCN1C2=NC=C(C=C2OC1=O)Cl	1	3	3	3	Good	4.60045	In	33	0.0806841	0.926359
711	Fenamidone	CC1(C(=O)N(C(=N1)SC)NC2=CC=CC=C2)C3=CC=CC=C3	1	3	3	3	Good	4.58336	In	10	0.241312	0.684534
1621	Transfluthrin	CC1(C(C1C(=O)OCC2=C(C(=CC(=C2F)F)F)F)C=C(Cl)Cl)C	1	3	3	3	Good	4.58214	In	34	0.258452	0.565467
683	Ethiozin	CCSC1=NN=C(C(=O)N1N)C(C)(C)C	1	3	3	3	Good	4.57739	In	10	0.2365	0.688868
203	Bethoxazin	C1CS(=O)C(=NO1)C2=CC3=CC=CC=C3S2	1	3	3	3	Good	4.57647	In	10	0.23576	0.689539
1290	Pefurazoate	CCC(C(=O)OCCCC=C)N(CC1=CC=CO1)C(=O)N2C=CN=C2	1	3	3	3	Good	4.57435	In	34	0.260165	0.558341
1459	Quinofumelin	CC1(C(C2=CC=CC=C2C(=N1)C3=CC4=CC=CC=C4N=C3)(F)F)C	1	3	3	3	Good	4.57287	In	10	0.232854	0.692188
998	Iodobonil	C=CCOC(=O)OC1=C(C=C(C=C1I)C#N)I	1	3	3	3	Good	4.57203	In	34	0.260694	0.556221
141	Azafenidin	C#CCOC1=C(C=C(C(=C1)N2C(=O)N3CCCCC3=N2)Cl)Cl	1	3	3	3	Good	4.57071	In	10	0.231113	0.693784
429	Coumachlor	CC(=O)CC(C1=CC=C(C=C1)Cl)C2=C(C3=CC=CC=C3OC2=O)O	1	3	3	3	Good	4.56411	In	34	0.262565	0.54898
673	Ethalfluralin	CCN(CC(=C)C)C1=C(C=C(C=C1[N+](=O)[O-])C(F)(F)F)[N+](=O)[O-]	1	3	3	3	Good	4.56374	In	10	0.225493	0.698989
1517	Strobane	ClC1[C@@]2(Cl)C(C)(C)C(=C)[C@@]1(Cl)C(Cl)(Cl)C2(Cl)Cl	1	3	3	3	Good	4.56056	In	10	0.222936	0.701384
1141	Metam	CNC(=S)S	1	3	3	3	Good	4.55418	In	10	0.217788	0.706254
1193	Metribuzin	CC(C)(C)C1=NN=C(N(C1=O)N)SC	1	3	3	3	Good	4.55072	In	10	0.215004	0.708915
513	Dialifos	CCOP(=S)(OCC)SC(CCl)N1C(=O)C2=CC=CC=C2C1=O	1	3	3	3	Good	4.54434	In	26	0.126654	0.855934
1205	Momfluorothrin	CC(=CC1C(C1(C)C)C(=O)OCC2=C(C(=C(C(=C2F)F)COC)F)F)C#N	1	3	3	3	Good	4.54355	In	6	0.320568	0.597773
774	Ferbam	CN(C)C([S-])=S	1	3	3	3	Good	4.54243	In	10	0.208319	0.71539
60	Acequinocyl	CCCCCCCCCCCCC1=C(C(=O)C2=CC=CC=C2C1=O)OC(=O)C	1	3	3	3	Good	4.53261	In	34	0.270955	0.52019
1403	Pymetrozine	CC1=NNC(=O)N(C1)N=CC2=CN=CC=C2	1	3	3	3	Good	4.52771	In	10	0.196455	0.727177
452	Cyclohexanone	C1CCC(=O)CC1	1	3	3	3	Good	4.51953	In	10	0.189854	0.733904
1238	Nitenpyram	CCN(CC1=CN=C(C=C1)Cl)C(=C[N+](=O)[O-])NC	1	3	3	3	Good	4.51539	In	10	0.186521	0.737349
727	Fenfluthrin	CC1(C(C1C(=O)OCC2=C(C(=C(C(=C2F)F)F)F)F)C=C(Cl)Cl)C	1	3	3	3	Good	4.51446	In	34	0.276442	0.503598
430	Coumafuryl	CC(=O)CC(C1=CC=CO1)C2=C(C3=CC=CC=C3OC2=O)O	1	3	3	3	Good	4.50865	In	34	0.278292	0.498291
3	(R)-flufiprole	CC(=C)CNC1=C(C(=NN1C2=C(C=C(C=C2Cl)C(F)(F)F)Cl)C#N)S(=O)C(F)(F)F	1	3	3	3	Good	4.50701	In	10	0.179765	0.744432
823	Flufiprole	CC(=C)CNC1=C(C(=NN1C2=C(C=C(C=C2Cl)C(F)(F)F)Cl)C#N)S(=O)C(F)(F)F	1	3	3	3	Good	4.50701	In	10	0.179765	0.744432
929	Guazatine	C(CCCCN=C(N)N)CCCNCCCCCCCCN=C(N)N	1	3	3	3	Good	4.48973	In	10	0.165837	0.759469
987	Iminoctadine triacetate	NC(N)=NCCCCCCCCNCCCCCCCCN=C(N)N	1	3	3	3	Good	4.48973	In	10	0.165837	0.759469
1507	Sodium tetrathiocarbonate	C(=S)([S-])S[S-]	1	3	3	3	Good	4.4884	In	10	0.164761	0.760656
865	Fluridone	CN1C=C(C(=O)C(=C1)C2=CC(=CC=C2)C(F)(F)F)C3=CC=CC=C3	1	3	3	3	Good	4.4868	In	10	0.163469	0.762087
1394	Prothioconazole	C1CC1(C(CC2=CC=CC=C2Cl)(CN3C(=S)N=CN3)O)Cl	1	3	3	3	Good	4.48534	In	10	0.162299	0.763386
29	1-octyl-2-pyrrolidone	CCCCCCCCN1CCCC1=O	1	3	3	3	Good	4.47362	In	10	0.152852	0.774047
635	Ditalimfos	CCOP(=S)(N1C(=O)C2=CC=CC=C2C1=O)OCC	1	3	3	3	Good	4.46685	In	26	0.0583694	0.928015
1511	Spirobudifen	CCCCOC(=O)OC1=C(C(=O)OC12CCCCC2)C3=C(C=C(C=C3)Cl)Cl	1	3	3	3	Good	4.46643	In	38	0.27585	0
219	Bisthiosemi	C(NNC(=S)N)NNC(=S)N	1	3	3	3	Good	4.45516	In	10	0.137964	0.791466
1174	Methyl nonyl ketone	CCCCCCCCCC(=O)C	1	3	3	3	Good	4.45483	In	10	0.137702	0.79178
1590	Thiofanox	CC(C)(C)C(=NOC(=O)NC)CSC	1	3	3	3	Good	4.45384	In	10	0.136904	0.792736
1427	Pyributicarb	CC(C)(C)C1=CC(=CC=C1)OC(=S)N(C)C2=NC(=CC=C2)OC	1	3	3	3	Good	4.45166	In	10	0.135147	0.794851
732	Fenmezoditiaz	C[n+]1c2n([C@H](CS2)c2cnc(s2)Cl)c(=O)c(c1[O-])c1ccccc1	1	3	3	3	Good	4.45124	In	10	0.134811	0.795257
1143	Metamitron	CC1=NN=C(C(=O)N1N)C2=CC=CC=C2	1	3	3	3	Good	4.44474	In	10	0.129567	0.801641
1449	Pyroquilon	C1CC(=O)N2CCC3=CC=CC1=C32	1	3	3	3	Good	4.43786	In	10	0.124025	0.8085
95	Alpha-naphthylthiourea	C1=CC=C2C(=C1)C=CC=C2NC(=S)N	1	3	3	3	Good	4.43265	In	10	0.119822	0.813781
1374	Propaquizafop	CC(C(=O)OCCON=C(C)C)OC1=CC=C(C=C1)OC2=CN=C3C=C(C=CC3=N2)Cl	1	3	3	3	Good	4.43234	In	10	0.119573	0.814096
1246	N-methyl-2-pyrrolidone	CN1CCCC1=O	1	3	3	3	Good	4.43202	In	10	0.11931	0.81443
1172	Methyl isobutyl ketone	CC(C)CC(=O)C	1	3	3	3	Good	4.42967	In	10	0.117416	0.816836
986	Imidaclothiz	C1CN(C(=N1)N[N+](=O)[O-])CC2=CN=C(S2)Cl	1	3	3	3	Good	4.42944	In	10	0.117235	0.817066
985	Imidacloprid	C1CN(C(=N1)N[N+](=O)[O-])CC2=CN=C(C=C2)Cl	1	3	3	3	Good	4.42729	In	10	0.115503	0.81928
451	Cycloate	CCN(C1CCCCC1)C(=O)SCC	1	3	3	3	Good	4.42586	In	10	0.114348	0.820764
1204	Molinate	CCSC(=O)N1CCCCCC1	1	3	3	3	Good	4.42469	In	10	0.113401	0.821984
1034	Isopolinate	CC(C)SC(=O)N1CCCCCC1	1	3	3	3	Good	4.42351	In	10	0.112454	0.823208
1222	N,N-dimethyl capramide	CCCCCCCCCC(=O)N(C)C	1	3	3	3	Good	4.41724	In	10	0.107401	0.8298
267	Butocarboxim	CC(C(=NOC(=O)NC)C)SC	1	3	3	3	Good	4.41498	In	10	0.105581	0.8322
1683	Vernolate	CCCN(CCC)C(=O)SCCC	1	3	3	3	Good	4.41348	In	10	0.104368	0.833808
1289	Pebulate	CCCCN(CC)C(=O)SCCC	1	3	3	3	Good	4.40984	In	10	0.101432	0.837724
663	EPTC	CCCN(CCC)C(=O)SCC	1	3	3	3	Good	4.40439	In	10	0.0970386	0.843654
1364	Prohydrojasmon	CCCCCC1C(CCC1=O)CC(=O)OCCC	1	3	3	3	Good	4.40215	In	10	0.0952342	0.846114
275	Butylate	CCSC(=O)N(CC(C)C)CC(C)C	1	3	3	3	Good	4.40143	In	10	0.0946524	0.84691
1079	Malathion	CCOC(=O)CC(C(=O)OCC)SP(=S)(OC)OC	1	3	3	3	Good	4.40061	In	26	0	1
582	Dimepiperate	CC(C)(C1=CC=CC=C1)SC(=O)N2CCCCC2	1	3	3	3	Good	4.39845	In	10	0.0922484	0.850216
384	Chlorthiamid	C1=CC(=C(C(=C1)Cl)C(=S)N)Cl	1	3	3	3	Good	4.39706	In	10	0.0911299	0.851762
643	Dodine	CCCCCCCCCCCCN=C(N)N	1	3	3	3	Good	4.39486	In	10	0.0893589	0.854223
1181	Methylmercury dicyanamide	C[Hg]N=C(N)NC#N	1	3	3	3	Good	4.39208	In	10	0.0871151	0.857362
1109	Mecarphon	CN(C(=O)CSP(=S)(C)OC)C(=O)OC	1	3	3	3	Good	4.39201	In	26	0.00757284	0.989936
320	Chloranocryl	CC(=C)C(=O)NC1=CC(=C(C=C1)Cl)Cl	1	3	3	3	Good	4.38948	In	10	0.0850173	0.860317
1390	Prosulfocarb	CCCN(CCC)C(=O)SCC1=CC=CC=C1	1	3	3	3	Good	4.38858	In	10	0.0842944	0.86134
1543	Tebutam	CC(C)N(CC1=CC=CC=C1)C(=O)C(C)(C)C	1	3	3	3	Good	4.38801	In	10	0.0838399	0.861984
1604	Tiocarbazil	CCC(C)N(C(C)CC)C(=O)SCC1=CC=CC=C1	1	3	3	3	Good	4.38623	In	10	0.0824006	0.864031
681	Ethiolate	CCN(CC)C(=O)SCC	1	3	3	3	Good	4.3862	In	10	0.0823805	0.86406
1425	Pyribencarb	CC1=NC(=CC=C1)CON=C(C)C2=CC(=C(C=C2)Cl)CNC(=O)OC	1	3	3	3	Good	4.37774	In	10	0.0755569	0.8739
667	Esprocarb	CCN(C(C)C(C)C)C(=O)SCC1=CC=CC=C1	1	3	3	3	Good	4.37683	In	10	0.0748254	0.874968
1247	N-methylneodecanamide	CCC(C)(CCC(C)C)C(=O)NC	1	3	3	3	Good	4.37359	In	10	0.0722108	0.878808
1107	Mecarbam	CCOC(=O)N(C)C(=O)CSP(=S)(OCC)OCC	1	3	3	3	Good	4.3727	In	26	0.0245869	0.967326
472	Cyometrinil	C1=CC=C(C=C1)C(=NOCC#N)C#N	1	3	3	3	Good	4.36898	In	10	0.0684989	0.884317
1164	Methomyl	CC(=NOC(=O)NC)SC	1	3	3	3	Good	4.36718	In	10	0.0670407	0.8865
1300	Pentoxazone	CC(=C1C(=O)N(C(=O)O1)C2=CC(=C(C=C2F)Cl)OC3CCCC3)C	1	3	2	2	Moderate	4.36393	In	38	0.257514	0
565	Diethyltoluamide	CCN(CC)C(=O)C1=CC(=CC=C1)C	1	3	3	3	Good	4.34683	In	10	0.0506404	0.911817
741	Fenothiocarb	CN(C)C(=O)SCCCCOC1=CC=CC=C1	1	3	3	3	Good	4.34461	In	10	0.0488518	0.914666
1030	Isomalathion	CCOC(=O)CC(C(=O)OCC)SP(=O)(OC)SC	1	3	3	3	Good	4.34328	In	26	0.0505114	0.932874
1263	Orbencarb	CCN(CC)C(=O)SCC1=CC=CC=C1Cl	1	3	3	3	Good	4.34271	In	10	0.0473147	0.917129
621	Diphenamid	CN(C)C(=O)C(C1=CC=CC=C1)C2=CC=CC=C2	1	3	3	3	Good	4.33682	In	10	0.0425727	0.92481
1398	Proximpham	CC(=NOC(=O)NC1=CC=CC=C1)C	1	3	3	3	Good	4.33598	In	10	0.0418954	0.925917
189	Benzipram	CC1=CC(=CC(=C1)C(=O)N(CC2=CC=CC=C2)C(C)C)C	1	3	3	3	Good	4.33365	In	10	0.0400173	0.929003
1393	Prothiocarb	CCSC(=O)NCCCN(C)C	1	3	3	3	Good	4.33159	In	10	0.0383519	0.931756
1032	Isonoruron	CN(C)C(=O)NC1CCC2C1C3CCC2C3	1	3	3	3	Good	4.33026	In	10	0.037279	0.933538
1252	Noruron	CN(C)C(=O)NC1CC2CC1C3C2CCC3	1	3	3	3	Good	4.32963	In	10	0.0367765	0.934375
508	Denatonium benzoate	CC[N+](CC)(CC(=O)NC1=C(C)C=CC=C1C)CC1=CC=CC=C1	1	3	3	3	Good	4.3296	In	10	0.0367516	0.934416
418	Clothianidin	CN=C(NCC1=CN=C(S1)Cl)N[N+](=O)[O-]	1	3	3	3	Good	4.32842	In	10	0.0358014	0.936003
1370	Propamidine	C1=CC(=CC=C1C(=N)N)OCCCOC2=CC=C(C=C2)C(=N)N	1	3	3	3	Good	4.327	In	10	0.0346503	0.937934
483	Cypromid	C1CC1C(=O)NC2=CC(=C(C=C2)Cl)Cl	1	3	3	3	Good	4.32084	In	10	0.0296907	0.94634
847	Fluoxapiprolin	CS(=O)(=O)OC1=C(C(=CC=C1)Cl)C2CC(=NO2)C3=CSC(=N3)C4CCN(CC4)C(=O)CN5C(=CC(=N5)C(F)F)C(F)F	1	3	3	3	Good	4.31876	In	10	0.0280107	0.949223
68	Acibenzolar-S-methyl	CSC(=O)C1=C2C(=CC=C1)N=NS2	1	3	3	3	Good	4.31768	In	10	0.0271382	0.950726
1298	Pentanochlor	CCCC(C)C(=O)NC1=CC(=C(C=C1)C)Cl	1	3	3	3	Good	4.31303	In	10	0.023396	0.95723
311	Chinomethionat	CC1=CC2=C(C=C1)N=C3C(=N2)SC(=O)S3	1	3	3	3	Good	4.31081	In	10	0.0216	0.960383
1206	Monalide	CCCC(C)(C)C(=O)NC1=CC=C(C=C1)Cl	1	3	3	3	Good	4.31064	In	10	0.0214653	0.960621
460	Cycluron	CN(C)C(=O)NC1CCCCCCC1	1	3	3	3	Good	4.31012	In	10	0.0210491	0.961355
454	Cycloprate	CCCCCCCCCCCCCCCCOC(=O)C1CC1	1	3	3	3	Good	4.30971	In	10	0.020716	0.961943
1103	MCPA-thioethyl	CCSC(=O)COC1=C(C=C(C=C1)Cl)C	1	3	3	3	Good	4.30837	In	10	0.0196388	0.96385
1147	Metazoxolon	CC1=NOC(=O)C1=NNC2=CC(=CC=C2)Cl	1	3	3	3	Good	4.30822	In	10	0.0195182	0.964064
1127	Meperfluthrin	CC1(C(C1C(=O)OCC2=C(C(=C(C(=C2F)F)COC)F)F)C=C(Cl)Cl)C	1	3	3	3	Good	4.30808	In	34	0.358626	0.41721
1468	Renofluthrin	CC1(C(C1C(=O)OCC2=C(C(=C(C(=C2F)F)COC)F)F)C=C(Cl)Cl)C	1	3	3	3	Good	4.30808	In	34	0.358626	0.41721
1169	Methoxyphenone	CC1=CC=CC(=C1)C(=O)C2=CC(=C(C=C2)OC)C	1	3	3	3	Good	4.30725	In	10	0.0187309	0.965464
831	Flumipropyn	CC(C#C)OC1=C(C=C(C(=C1)N2C(=O)C3=C(C2=O)CCCC3)F)Cl	1	3	3	3	Good	4.30462	In	10	0.016614	0.969247
1456	Quinconazole	C1=CC=C2C(=C1)C(=O)N(C(=N2)N3C=NC=N3)C4=C(C=C(C=C4)Cl)Cl	1	3	3	3	Good	4.30316	In	10	0.0154326	0.971371
1230	Napropamide	CCN(CC)C(=O)C(C)OC1=CC=CC2=CC=CC=C21	1	3	3	3	Good	4.29949	In	10	0.0124742	0.976732
1231	Napropamide-M	CCN(CC)C(=O)C(C)OC1=CC=CC2=CC=CC=C21	1	3	3	3	Good	4.29949	In	10	0.0124742	0.976732
746	Fenoxasulfone	CCOC1=C(C=C(C(=C1)Cl)CS(=O)(=O)C2=NOC(C2)(C)C)Cl	1	3	3	3	Good	4.29744	In	10	0.0108227	0.97975
312	Chlobenthiazone	CN1C2=C(C=CC=C2Cl)SC1=O	1	3	3	3	Good	4.29721	In	10	0.0106432	0.980079
236	Bromobutide	CC(C)(C)C(C(=O)NC(C)(C)C1=CC=CC=C1)Br	1	3	3	3	Good	4.29639	In	10	0.00998151	0.981294
395	Cisanilide	CC1CCC(N1C(=O)NC2=CC=CC=C2)C	1	3	3	3	Good	4.2928	In	10	0.00708283	0.986654
644	Drazoxolon	CC1=NOC(=O)C1=NNC2=CC=CC=C2Cl	1	3	3	3	Good	4.29178	In	10	0.00625974	0.988187
15	1,2-benzisothiazolin-3-one	C1=CC=C2C(=C1)C(=O)NS2	1	3	3	3	Good	4.29134	In	10	0.00590867	0.988842
410	Clomazone	CC1(CON(C1=O)CC2=CC=CC=C2Cl)C	1	3	3	3	Good	4.2875	In	10	0.0028103	0.994662
4	(R)-flutriafol	C1=CC=C(C(=C1)C(CN2C=NC=N2)(C3=CC=C(C=C3)F)O)F	1	3	3	3	Good	4.28401	In	10	0	1
5	(R)-hexaconazole	CCCCC(CN1C=NC=N1)(C2=C(C=C(C=C2)Cl)Cl)O	1	3	3	3	Good	4.28401	In	10	0	1
6	(S)-flutriafol	C1=CC=C(C(=C1)C(CN2C=NC=N2)(C3=CC=C(C=C3)F)O)F	1	3	3	3	Good	4.28401	In	10	0	1
9	1,1,1,2-tetrachloroethane	C(C(Cl)(Cl)Cl)Cl	1	3	3	3	Good	4.28401	In	10	0	1
10	1,1,1-acetonitrile	CC#N	1	3	3	3	Good	4.28401	In	10	0	1
11	1,1,1-trichloroethane	CC(Cl)(Cl)Cl	1	3	3	3	Good	4.28401	In	10	0	1
13	1,1-dichloroethane	CC(Cl)Cl	1	3	3	3	Good	4.28401	In	10	0	1
14	1,2,3-trichloropropane	C(C(CCl)Cl)Cl	1	3	3	3	Good	4.28401	In	10	0	1
16	1,2-dibromoethane	C(CBr)Br	1	3	3	3	Good	4.28401	In	10	0	1
17	1,2-dichloropropane	CC(CCl)Cl	1	3	3	3	Good	4.28401	In	10	0	1
20	1,3-dinitrobenzene	C1=CC(=CC(=C1)[N+](=O)[O-])[N+](=O)[O-]	1	3	3	3	Good	4.28401	In	10	0	1
21	1,4-dimethylnaphthalene	CC1=CC=C(C2=CC=CC=C12)C	1	3	3	3	Good	4.28401	In	10	0	1
23	10,10'-oxybisphenoxarsine	C1=CC=C2C(=C1)OC3=CC=CC=C3[As]2O[As]4C5=CC=CC=C5OC6=CC=CC=C64	1	3	3	3	Good	4.28401	In	10	0	1
24	1-decanol	CCCCCCCCCCO	1	3	3	3	Good	4.28401	In	10	0	1
26	1-methylnaphthalene	CC1=CC=CC2=CC=CC=C12	1	3	3	3	Good	4.28401	In	10	0	1
30	2-(octylthio)ethanol	CCCCCCCCSCCO	1	3	3	3	Good	4.28401	In	10	0	1
31	2-(thiocyanomethylthio)benzothiazole	C1=CC=C2C(=C1)N=C(S2)SCSC#N	1	3	3	3	Good	4.28401	In	10	0	1
35	2,4,5-trichlorophenol	C1=C(C(=CC(=C1Cl)Cl)Cl)O	1	3	3	3	Good	4.28401	In	10	0	1
40	2,4-DEP	C1=CC(=C(C=C1Cl)Cl)OCCOP(OCCOC2=C(C=C(C=C2)Cl)Cl)OCCOC3=C(C=C(C=C3)Cl)Cl	1	3	3	3	Good	4.28401	In	10	0	1
41	2,4-dimethylphenol	CC1=CC(=C(C=C1)O)C	1	3	3	3	Good	4.28401	In	10	0	1
46	2-aminobutane	CCC(C)N	1	3	3	3	Good	4.28401	In	10	0	1
48	2-hydrazinoethanol	C(CO)NN	1	3	3	3	Good	4.28401	In	10	0	1
52	2-methyl naphthalene	CC1=CC2=CC=CC=C2C=C1	1	3	3	3	Good	4.28401	In	10	0	1
54	2-phenylphenol	C1=CC=C(C=C1)C2=CC=CC=C2O	1	3	3	3	Good	4.28401	In	10	0	1
55	4,4-methylenedianiline	C1=CC(=CC=C1CC2=CC=C(C=C2)N)N	1	3	3	3	Good	4.28401	In	10	0	1
56	4-aminopyridine	C1=CN=CC=C1N	1	3	3	3	Good	4.28401	In	10	0	1
57	8-hydroxyquinoline	C1=CC2=C(C(=C1)O)N=CC=C2	1	3	3	3	Good	4.28401	In	10	0	1
72	Aclonifen	C1=CC=C(C=C1)OC2=C(C(=C(C=C2)[N+](=O)[O-])N)Cl	1	3	3	3	Good	4.28401	In	10	0	1
76	Acynonapyr	CCCOC1=C(C=CC(=C1)C(F)(F)F)OC2CC3CCCC(C2)N3OC4=NC=C(C=C4)C(F)(F)F	1	3	3	3	Good	4.28401	In	10	0	1
92	Alpha-chlorohydrin	C(C(CCl)O)O	1	3	3	3	Good	4.28401	In	10	0	1
96	Aluminium ammonium sulphate	[O-]S([O-])(=O)=O	1	3	3	3	Good	4.28401	In	10	0	1
97	Aluminium phosphide	[Al]#P	1	3	3	3	Good	4.28401	In	10	0	1
98	Ametoctradin	CCCCCCCCC1=C(N2C(=NC=N2)N=C1CC)N	1	3	3	3	Good	4.28401	In	10	0	1
100	Ametryn	CCNC1=NC(=NC(=N1)SC)NC(C)C	1	3	3	3	Good	4.28401	In	10	0	1
116	Amisulbrom	CC1=C(C2=C(N1S(=O)(=O)C3=NN(C=N3)S(=O)(=O)N(C)C)C=C(C=C2)F)Br	1	3	3	3	Good	4.28401	In	10	0	1
119	Amitraz	CC1=CC(=C(C=C1)N=CN(C)C=NC2=C(C=C(C=C2)C)C)C	1	3	3	3	Good	4.28401	In	10	0	1
120	Amitrole	C1=NNC(=N1)N	1	3	3	3	Good	4.28401	In	10	0	1
123	Ammonium sulphamate	NS(=O)(=O)[O-]	1	3	3	3	Good	4.28401	In	10	0	1
124	Ammonium sulphate	[O-]S(=O)(=O)[O-]	1	3	3	3	Good	4.28401	In	10	0	1
125	Ammonium thiocyanate	C(#N)[S-]	1	3	3	3	Good	4.28401	In	10	0	1
126	Ampropylfos	CCC(N)P(=O)(O)O	1	3	3	3	Good	4.28401	In	10	0	1
127	Ancymidol	COC1=CC=C(C=C1)C(C2CC2)(C3=CN=CN=C3)O	1	3	3	3	Good	4.28401	In	10	0	1
128	Anilazine	C1=CC=C(C(=C1)NC2=NC(=NC(=N2)Cl)Cl)Cl	1	3	3	3	Good	4.28401	In	10	0	1
131	Aramite	CC(COC1=CC=C(C=C1)C(C)(C)C)OS(=O)OCCCl	1	3	3	3	Good	4.28401	In	10	0	1
132	Arsenic acid	O[As](=O)(O)O	1	3	3	3	Good	4.28401	In	10	0	1
138	Atraton	CCNC1=NC(=NC(=N1)OC)NC(C)C	1	3	3	3	Good	4.28401	In	10	0	1
139	Atrazine	CCNC1=NC(=NC(=N1)Cl)NC(C)C	1	3	3	3	Good	4.28401	In	10	0	1
146	Aziprotryne	CC(C)NC1=NC(=NC(=N1)N=[N+]=[N-])SC	1	3	3	3	Good	4.28401	In	10	0	1
148	Azobenzene	C1=CC=C(C=C1)N=NC2=CC=CC=C2	1	3	3	3	Good	4.28401	In	10	0	1
149	Azocyclotin	C1CCC(CC1)[Sn](C2CCCCC2)(C3CCCCC3)N4C=NC=N4	1	3	3	3	Good	4.28401	In	10	0	1
152	Azoxybenzene	C1=CC=C(C=C1)N=[N+](C2=CC=CC=C2)[O-]	1	3	3	3	Good	4.28401	In	10	0	1
164	Benclothiaz	C1=CC2=C(C(=C1)Cl)SN=C2	1	3	3	3	Good	4.28401	In	10	0	1
166	Benfluralin	CCCCN(CC)C1=C(C=C(C=C1[N+](=O)[O-])C(F)(F)F)[N+](=O)[O-]	1	3	3	3	Good	4.28401	In	10	0	1
168	Benfuresate	CCS(=O)(=O)OC1=CC2=C(C=C1)OCC2(C)C	1	3	3	3	Good	4.28401	In	10	0	1
176	Bensultap	CN(C)C(CSS(=O)(=O)C1=CC=CC=C1)CSS(=O)(=O)C2=CC=CC=C2	1	3	3	3	Good	4.28401	In	10	0	1
181	Bentonite	O=[Al]O[Al]=O	1	3	3	3	Good	4.28401	In	10	0	1
187	Benzamorf	CCCCCCCCCCCCC1=CC=C(C=C1)S(O)(=O)=O	1	3	3	3	Good	4.28401	In	10	0	1
192	Benzofluor	CCSC1=CC(=C(C=C1)NS(=O)(=O)C)C(F)(F)F	1	3	3	3	Good	4.28401	In	10	0	1
212	Biphenyl	C1=CC=C(C=C1)C2=CC=CC=C2	1	3	3	3	Good	4.28401	In	10	0	1
215	Bis(methylmercury) sulphate	C[Hg]OS(=O)(=O)O[Hg]C	1	3	3	3	Good	4.28401	In	10	0	1
220	Bis-trichloromethyl sulfone	C(S(=O)(=O)C(Cl)(Cl)Cl)(Cl)(Cl)Cl	1	3	3	3	Good	4.28401	In	10	0	1
222	Bitertanol	CC(C)(C)C(C(N1C=NC=N1)OC2=CC=C(C=C2)C3=CC=CC=C3)O	1	3	3	3	Good	4.28401	In	10	0	1
223	Bithionol	C1=C(C=C(C(=C1Cl)O)SC2=CC(=CC(=C2O)Cl)Cl)Cl	1	3	3	3	Good	4.28401	In	10	0	1
233	Bromethalin	CN(C1=C(C=C(C=C1C(F)(F)F)[N+](=O)[O-])[N+](=O)[O-])C2=C(C=C(C=C2Br)Br)Br	1	3	3	3	Good	4.28401	In	10	0	1
239	Bromomethane	CBr	1	3	3	3	Good	4.28401	In	10	0	1
243	Bromoxynil	C1=C(C=C(C(=C1Br)O)Br)C#N	1	3	3	3	Good	4.28401	In	10	0	1
246	Bromoxynil-potassium	C1=C(C=C(C(=C1Br)[O-])Br)C#N	1	3	3	3	Good	4.28401	In	10	0	1
250	Bronopol	C(C(CO)([N+](=O)[O-])Br)O	1	3	3	3	Good	4.28401	In	10	0	1
254	Buminafos	CCCCNC1(CCCCC1)P(=O)(OCCCC)OCCCC	1	3	3	3	Good	4.28401	In	10	0	1
255	Bupirimate	CCCCC1=C(N=C(N=C1OS(=O)(=O)N(C)C)NCC)C	1	3	3	3	Good	4.28401	In	10	0	1
260	Butan-1-ol	CCCCO	1	3	3	3	Good	4.28401	In	10	0	1
261	Butanethiol	C(CC)CS	1	3	3	3	Good	4.28401	In	10	0	1
271	Butralin	CCC(C)NC1=C(C=C(C=C1[N+](=O)[O-])C(C)(C)C)[N+](=O)[O-]	1	3	3	3	Good	4.28401	In	10	0	1
276	Cacodylic acid	C[As](=O)(C)O	1	3	3	3	Good	4.28401	In	10	0	1
281	Calcium arsenate	[O-][As]([O-])([O-])=O	1	3	3	3	Good	4.28401	In	10	0	1
282	Calcium carbide	[C-]#[C-]	1	3	3	3	Good	4.28401	In	10	0	1
284	Calcium cyanamide	C(=[N-])=[N-]	1	3	3	3	Good	4.28401	In	10	0	1
285	Calcium phosphate	[O-]P([O-])([O-])=O	1	3	3	3	Good	4.28401	In	10	0	1
288	Camphechlor	C1C2C(C(C(C1(Cl)Cl)(C2(CCl)C(Cl)Cl)CCl)Cl)Cl	1	3	3	3	Good	4.28401	In	10	0	1
298	Carbon dioxide	C(=O)=O	1	3	3	3	Good	4.28401	In	10	0	1
299	Carbon disulphide	C(=S)=S	1	3	3	3	Good	4.28401	In	10	0	1
300	Carbon tetrachloride	C(Cl)(Cl)(Cl)Cl	1	3	3	3	Good	4.28401	In	10	0	1
310	Cetrimide	CCCCCCCCCCCCCC[N+](C)(C)C	1	3	3	3	Good	4.28401	In	10	0	1
313	Chlomethoxyfen	COC1=C(C=CC(=C1)OC2=C(C=C(C=C2)Cl)Cl)[N+](=O)[O-]	1	3	3	3	Good	4.28401	In	10	0	1
314	Chloral hydrate	C(C(Cl)(Cl)Cl)(O)O	1	3	3	3	Good	4.28401	In	10	0	1
318	Chloraniformethan	C1=CC(=C(C=C1NC(C(Cl)(Cl)Cl)NC=O)Cl)Cl	1	3	3	3	Good	4.28401	In	10	0	1
324	Chlorazine	CCN(CC)C1=NC(=NC(=N1)Cl)N(CC)CC	1	3	3	3	Good	4.28401	In	10	0	1
325	Chlorbenside	C1=CC(=CC=C1CSC2=CC=C(C=C2)Cl)Cl	1	3	3	3	Good	4.28401	In	10	0	1
331	Chlordimeform	CC1=C(C=CC(=C1)Cl)N=CN(C)C	1	3	3	3	Good	4.28401	In	10	0	1
332	Chlordimeform hydrochloride	CN(C)C=NC1=C(C)C=C(Cl)C=C1	1	3	3	3	Good	4.28401	In	10	0	1
338	Chlorfenazole	C1=CC=C(C(=C1)C2=NC3=CC=CC=C3N2)Cl	1	3	3	3	Good	4.28401	In	10	0	1
339	Chlorfenethol	CC(C1=CC=C(C=C1)Cl)(C2=CC=C(C=C2)Cl)O	1	3	3	3	Good	4.28401	In	10	0	1
342	Chlorfenson	C1=CC(=CC=C1OS(=O)(=O)C2=CC=C(C=C2)Cl)Cl	1	3	3	3	Good	4.28401	In	10	0	1
343	Chlorfensulphide	C1=CC(=CC=C1SN=NC2=CC(=C(C=C2Cl)Cl)Cl)Cl	1	3	3	3	Good	4.28401	In	10	0	1
345	Chlorfluazole	C1=CC(=C(C2=C1NC(=N2)C(F)(F)F)Cl)Cl	1	3	3	3	Good	4.28401	In	10	0	1
354	Chlorine dioxide	O=Cl[O]	1	3	3	3	Good	4.28401	In	10	0	1
356	Chlormequat	C[N+](C)(C)CCCl	1	3	3	3	Good	4.28401	In	10	0	1
357	Chlornitrofen	C1=CC(=CC=C1[N+](=O)[O-])OC2=C(C=C(C=C2Cl)Cl)Cl	1	3	3	3	Good	4.28401	In	10	0	1
359	Chloroneb	COC1=CC(=C(C=C1Cl)OC)Cl	1	3	3	3	Good	4.28401	In	10	0	1
361	Chloropicrin	C([N+](=O)[O-])(Cl)(Cl)Cl	1	3	3	3	Good	4.28401	In	10	0	1
365	Chlorothalonil	C(#N)C1=C(C(=C(C(=C1Cl)Cl)Cl)C#N)Cl	1	3	3	3	Good	4.28401	In	10	0	1
366	Chlorotoluene	C1=CC=C(C=C1)CCl	1	3	3	3	Good	4.28401	In	10	0	1
369	Chloroxylenol	CC1=CC(=CC(=C1Cl)C)O	1	3	3	3	Good	4.28401	In	10	0	1
370	Chloroxynil	C1=C(C=C(C(=C1Cl)O)Cl)C#N	1	3	3	3	Good	4.28401	In	10	0	1
371	Chlorphonium	CCCC[P+](CCCC)(CCCC)CC1=C(C=C(C=C1)Cl)Cl	1	3	3	3	Good	4.28401	In	10	0	1
372	Chlorphonium chloride	CCCC[P+](CCCC)(CCCC)CC1=C(C=C(C=C1)Cl)Cl	1	3	3	3	Good	4.28401	In	10	0	1
379	Chlorquinox	C1=CN=C2C(=C(C(=C(C2=N1)Cl)Cl)Cl)Cl	1	3	3	3	Good	4.28401	In	10	0	1
389	Choline chloride	C[N+](C)(C)CCO	1	3	3	3	Good	4.28401	In	10	0	1
406	Clofentezine	C1=CC=C(C(=C1)C2=NN=C(N=N2)C3=CC=CC=C3Cl)Cl	1	3	3	3	Good	4.28401	In	10	0	1
425	Copper II chloride	Cl[Cu]Cl	1	3	3	3	Good	4.28401	In	10	0	1
427	Copper oxychloride	O(Cl)Cl	1	3	3	3	Good	4.28401	In	10	0	1
428	Copper sulphate	[O-]S(=O)(=O)[O-]	1	3	3	3	Good	4.28401	In	10	0	1
436	Credazine	CC1=CC=CC=C1OC2=NN=CC=C2	1	3	3	3	Good	4.28401	In	10	0	1
437	Crimidine	CC1=CC(=NC(=N1)Cl)N(C)C	1	3	3	3	Good	4.28401	In	10	0	1
440	Cyanamide	C(#N)N	1	3	3	3	Good	4.28401	In	10	0	1
441	Cyanatryn	CCNC1=NC(=NC(=N1)SC)NC(C)(C)C#N	1	3	3	3	Good	4.28401	In	10	0	1
442	Cyanazine	CCNC1=NC(=NC(=N1)Cl)NC(C)(C)C#N	1	3	3	3	Good	4.28401	In	10	0	1
446	Cyazofamid	CC1=CC=C(C=C1)C2=C(N=C(N2S(=O)(=O)N(C)C)C#N)Cl	1	3	3	3	Good	4.28401	In	10	0	1
447	Cybutryne	CC(C)(C)NC1=NC(=NC(=N1)NC2CC2)SC	1	3	3	3	Good	4.28401	In	10	0	1
469	Cyhexatin	C1CCC(CC1)[Sn](C1CCCCC1)C1CCCCC1	1	3	3	3	Good	4.28401	In	10	0	1
475	Cyperquat	C[N+]1=CC=C(C=C1)C2=CC=CC=C2	1	3	3	3	Good	4.28401	In	10	0	1
476	Cyperquat iodide	C[n+]1ccc(cc1)c2ccccc2	1	3	3	3	Good	4.28401	In	10	0	1
478	Cyprazine	CC(C)NC1=NC(=NC(=N1)NC2CC2)Cl	1	3	3	3	Good	4.28401	In	10	0	1
479	Cyproconazole	CC(C1CC1)C(CN2C=NC=N2)(C3=CC=C(C=C3)Cl)O	1	3	3	3	Good	4.28401	In	10	0	1
480	Cyprodinil	CC1=NC(=NC(=C1)C2CC2)NC3=CC=CC=C3	1	3	3	3	Good	4.28401	In	10	0	1
486	Cyromazine	C1CC1NC2=NC(=NC(=N2)N)N	1	3	3	3	Good	4.28401	In	10	0	1
493	DDD	C1=CC(=CC=C1C(C2=CC=C(C=C2)Cl)C(Cl)Cl)Cl	1	3	3	3	Good	4.28401	In	10	0	1
494	DDT	C1=CC(=CC=C1C(C2=CC=C(C=C2)Cl)C(Cl)(Cl)Cl)Cl	1	3	3	3	Good	4.28401	In	10	0	1
496	Decafentin	CCCCCCCCCC[P+](C1=CC=CC=C1)(C1=CC=CC=C1)C1=CC=CC=C1	1	3	3	3	Good	4.28401	In	10	0	1
510	Desmetryn	CC(C)NC1=NC(=NC(=N1)NC)SC	1	3	3	3	Good	4.28401	In	10	0	1
515	Diamidaphos	CNP(=O)(NC)OC1=CC=CC=C1	1	3	3	3	Good	4.28401	In	10	0	1
517	Diammonium phosphate	OP(=O)([O-])[O-]	1	3	3	3	Good	4.28401	In	10	0	1
519	Dibromochloropropane	C(C(CBr)Br)Cl	1	3	3	3	Good	4.28401	In	10	0	1
525	Dichlobenil	C1=CC(=C(C(=C1)Cl)C#N)Cl	1	3	3	3	Good	4.28401	In	10	0	1
528	Dichlofluanid	CN(C)S(=O)(=O)N(C1=CC=CC=C1)SC(F)(Cl)Cl	1	3	3	3	Good	4.28401	In	10	0	1
531	Dichlorophen	C1=CC(=C(C=C1Cl)CC2=C(C=CC(=C2)Cl)O)O	1	3	3	3	Good	4.28401	In	10	0	1
545	Diclobutrazol	CC(C)(C)C(C(CC1=C(C=C(C=C1)Cl)Cl)N2C=NC=N2)O.CC(C)(C)C(C(CC1=C(C=C(C=C1)Cl)Cl)N2C=NC=N2)O	1	3	3	3	Good	4.28401	In	10	0	1
550	Dicloran	C1=C(C=C(C(=C1Cl)N)Cl)[N+](=O)[O-]	1	3	3	3	Good	4.28401	In	10	0	1
552	Diclosulam	CCOC1=NC(=CC2=NC(=NN21)S(=O)(=O)NC3=C(C=CC=C3Cl)Cl)F	1	3	3	3	Good	4.28401	In	10	0	1
553	Dicofol	C1=CC(=CC=C1C(C2=CC=C(C=C2)Cl)(C(Cl)(Cl)Cl)O)Cl	1	3	3	3	Good	4.28401	In	10	0	1
559	Didecyldimethylammonium chloride	CCCCCCCCCC[N+](C)(C)CCCCCCCCCC	1	3	3	3	Good	4.28401	In	10	0	1
571	Difenzoquat	CN1C(=CC(=[N+]1C)C2=CC=CC=C2)C3=CC=CC=C3	1	3	3	3	Good	4.28401	In	10	0	1
572	Difenzoquat metilsulfate	CN1C(=CC(C2=CC=CC=C2)=[N+]1C)C1=CC=CC=C1	1	3	3	3	Good	4.28401	In	10	0	1
574	Diflovidazin	C1=CC=C(C(=C1)C2=NN=C(N=N2)C3=C(C=CC=C3F)F)Cl	1	3	3	3	Good	4.28401	In	10	0	1
578	Diflumetorim	CCC(C1=CC=C(C=C1)OC(F)F)NC2=NC=NC(=C2Cl)C	1	3	3	3	Good	4.28401	In	10	0	1
580	Dimefox	CN(C)P(=O)(N(C)C)F	1	3	3	3	Good	4.28401	In	10	0	1
585	Dimethametryn	CCNC1=NC(=NC(=N1)SC)NC(C)C(C)C	1	3	3	3	Good	4.28401	In	10	0	1
593	Dimethyl disulfide	CSSC	1	3	3	3	Good	4.28401	In	10	0	1
600	Dinex	C1CCC(CC1)C2=CC(=CC(=C2O)[N+](=O)[O-])[N+](=O)[O-]	1	3	3	3	Good	4.28401	In	10	0	1
601	Dinex-diclexine	OC1=C(C=C(C=C1C1CCCCC1)[N+]([O-])=O)[N+]([O-])=O	1	3	3	3	Good	4.28401	In	10	0	1
604	Dinitramine	CCN(CC)C1=C(C=C(C(=C1[N+](=O)[O-])N)C(F)(F)F)[N+](=O)[O-]	1	3	3	3	Good	4.28401	In	10	0	1
610	Dinosam	CCCC(C)C1=CC(=CC(=C1O)[N+](=O)[O-])[N+](=O)[O-]	1	3	3	3	Good	4.28401	In	10	0	1
614	Dinoterb	CC(C)(C)C1=CC(=CC(=C1O)[N+](=O)[O-])[N+](=O)[O-]	1	3	3	3	Good	4.28401	In	10	0	1
622	Diphenylamine	C1=CC=C(C=C1)NC2=CC=CC=C2	1	3	3	3	Good	4.28401	In	10	0	1
623	Dipotassium phosphonate	OP([O-])[O-]	1	3	3	3	Good	4.28401	In	10	0	1
624	Dipropalin	CCCN(CCC)C1=C(C=C(C=C1[N+](=O)[O-])C)[N+](=O)[O-]	1	3	3	3	Good	4.28401	In	10	0	1
625	Dipropetryn	CCSC1=NC(=NC(=N1)NC(C)C)NC(C)C	1	3	3	3	Good	4.28401	In	10	0	1
627	Dipyrithione	C1=CC=[N+](C(=C1)SSC2=CC=CC=[N+]2[O-])[O-]	1	3	3	3	Good	4.28401	In	10	0	1
628	Diquat	C1C[N+]2=CC=CC=C2C3=CC=CC=[N+]31	1	3	3	3	Good	4.28401	In	10	0	1
629	Diquat dichloride	C[As](=O)([O-])[O-]	1	3	3	3	Good	4.28401	In	10	0	1
630	Disodium phosphonate	P([O-])([O-])=O	1	3	3	3	Good	4.28401	In	10	0	1
631	Disul	C1=CC(=C(C=C1Cl)Cl)OCCOS(=O)(=O)O	1	3	3	3	Good	4.28401	In	10	0	1
634	Disul-sodium	C1=CC(=C(C=C1Cl)Cl)OCCOS(=O)(=O)[O-]	1	3	3	3	Good	4.28401	In	10	0	1
640	DNOC	CC1=CC(=CC(=C1O)[N+](=O)[O-])[N+](=O)[O-]	1	3	3	3	Good	4.28401	In	10	0	1
645	Dufulin	CCOP(=O)(C(C1=CC=CC=C1F)NC2=NC3=C(C=CC=C3S2)C)OCC	1	3	3	3	Good	4.28401	In	10	0	1
675	Ethanedial	C(=O)C=O	1	3	3	3	Good	4.28401	In	10	0	1
676	Ethanethiol	CCS	1	3	3	3	Good	4.28401	In	10	0	1
677	Ethanol	CCO	1	3	3	3	Good	4.28401	In	10	0	1
678	Ethephon	C(CCl)P(=O)(O)O	1	3	3	3	Good	4.28401	In	10	0	1
684	Ethiprole	CCS(=O)C1=C(N(N=C1C#N)C2=C(C=C(C=C2Cl)C(F)(F)F)Cl)N	1	3	3	3	Good	4.28401	In	10	0	1
688	Ethohexadiol	CCCC(C(CC)CO)O	1	3	3	3	Good	4.28401	In	10	0	1
695	Ethyl butyl nitrosamine	CCCCN(CC)N=O	1	3	3	3	Good	4.28401	In	10	0	1
696	Ethyl formate	CCOC=O	1	3	3	3	Good	4.28401	In	10	0	1
698	Ethyl-DDD	CCC1=CC=C(C=C1)C(C2=CC=C(C=C2)CC)C(Cl)Cl	1	3	3	3	Good	4.28401	In	10	0	1
699	Ethylene dichloride	C(CCl)Cl	1	3	3	3	Good	4.28401	In	10	0	1
700	Ethylene glycol	C(CO)O	1	3	3	3	Good	4.28401	In	10	0	1
703	Ethylicin	CCSS(=O)(=O)CC	1	3	3	3	Good	4.28401	In	10	0	1
704	Ethylmercury bromide	C[CH2]	1	3	3	3	Good	4.28401	In	10	0	1
708	Etridiazole	CCOC1=NC(=NS1)C(Cl)(Cl)Cl	1	3	3	3	Good	4.28401	In	10	0	1
712	Fenaminosulf	CN(C)C1=CC=C(C=C1)N=NS(=O)(=O)[O-]	1	3	3	3	Good	4.28401	In	10	0	1
715	Fenapanil	CCCCC(CN1C=CN=C1)(C#N)C2=CC=CC=C2	1	3	3	3	Good	4.28401	In	10	0	1
716	Fenarimol	C1=CC=C(C(=C1)C(C2=CC=C(C=C2)Cl)(C3=CN=CN=C3)O)Cl	1	3	3	3	Good	4.28401	In	10	0	1
719	Fenazaquin	CC(C)(C)C1=CC=C(C=C1)CCOC2=NC=NC3=CC=CC=C32	1	3	3	3	Good	4.28401	In	10	0	1
720	Fenbuconazole	C1=CC=C(C=C1)C(CCC2=CC=C(C=C2)Cl)(CN3C=NC=N3)C#N	1	3	3	3	Good	4.28401	In	10	0	1
721	Fenbutatin oxide	CC(C)(C[Sn](CC(C)(C)C1=CC=CC=C1)(CC(C)(C)C2=CC=CC=C2)O[Sn](CC(C)(C)C3=CC=CC=C3)(CC(C)(C)C4=CC=CC=C4)CC(C)(C)C5=CC=CC=C5)C6=CC=CC=C6	1	3	3	3	Good	4.28401	In	10	0	1
725	Fenclorim	C1=CC=C(C=C1)C2=NC(=CC(=N2)Cl)Cl	1	3	3	3	Good	4.28401	In	10	0	1
748	Fenpiclonil	C1=CC(=C(C(=C1)Cl)Cl)C2=CNC=C2C#N	1	3	3	3	Good	4.28401	In	10	0	1
752	Fenpropidin	CC(CC1=CC=C(C=C1)C(C)(C)C)CN2CCCCC2	1	3	3	3	Good	4.28401	In	10	0	1
760	Fenson	C1=CC=C(C=C1)S(=O)(=O)OC2=CC=C(C=C2)Cl	1	3	3	3	Good	4.28401	In	10	0	1
768	Fentin chloride	C1=CC=C(C=C1)[Sn](C2=CC=CC=C2)(C3=CC=CC=C3)Cl	1	3	3	3	Good	4.28401	In	10	0	1
769	Fentin hydroxide	C1=CC=C(C=C1)[Sn](C1=CC=CC=C1)C1=CC=CC=C1	1	3	3	3	Good	4.28401	In	10	0	1
776	Ferric phosphate	[O-]P(=O)([O-])[O-]	1	3	3	3	Good	4.28401	In	10	0	1
777	Fipronil	C1=C(C=C(C(=C1Cl)N2C(=C(C(=N2)C#N)S(=O)C(F)(F)F)N)Cl)C(F)(F)F	1	3	3	3	Good	4.28401	In	10	0	1
787	Florasulam	COC1=NC=C(C2=NC(=NN21)S(=O)(=O)NC3=C(C=CC=C3F)F)F	1	3	3	3	Good	4.28401	In	10	0	1
797	Fluazinam	C1=C(C=NC(=C1Cl)NC2=C(C=C(C(=C2[N+](=O)[O-])Cl)C(F)(F)F)[N+](=O)[O-])C(F)(F)F	1	3	3	3	Good	4.28401	In	10	0	1
805	Fluchloralin	CCCN(CCCl)C1=C(C=C(C=C1[N+](=O)[O-])C(F)(F)F)[N+](=O)[O-]	1	3	3	3	Good	4.28401	In	10	0	1
812	Fludioxonil	C1=CC(=C2C(=C1)OC(O2)(F)F)C3=CNC=C3C#N	1	3	3	3	Good	4.28401	In	10	0	1
816	Flufenerim	CC(C1=C(C(=NC=N1)NCCC2=CC=C(C=C2)OC(F)(F)F)Cl)F	1	3	3	3	Good	4.28401	In	10	0	1
825	Flumetralin	CCN(CC1=C(C=CC=C1Cl)F)C2=C(C=C(C=C2[N+](=O)[O-])C(F)(F)F)[N+](=O)[O-]	1	3	3	3	Good	4.28401	In	10	0	1
826	Flumetsulam	CC1=NC2=NC(=NN2C=C1)S(=O)(=O)NC3=C(C=CC=C3F)F	1	3	3	3	Good	4.28401	In	10	0	1
837	Fluorbenside	C1=CC(=CC=C1CSC2=CC=C(C=C2)F)Cl	1	3	3	3	Good	4.28401	In	10	0	1
840	Fluorodifen	C1=CC(=CC=C1[N+](=O)[O-])OC2=C(C=C(C=C2)C(F)(F)F)[N+](=O)[O-]	1	3	3	3	Good	4.28401	In	10	0	1
843	Fluoromidine	C1=C2C(=NC=C1Cl)N=C(N2)C(F)(F)F	1	3	3	3	Good	4.28401	In	10	0	1
844	Fluoronitrofen	C1=CC(=CC=C1[N+](=O)[O-])OC2=C(C=C(C=C2Cl)Cl)F	1	3	3	3	Good	4.28401	In	10	0	1
846	Fluotrimazole	C1=CC=C(C=C1)C(C2=CC=CC=C2)(C3=CC(=CC=C3)C(F)(F)F)N4C=NC=N4	1	3	3	3	Good	4.28401	In	10	0	1
850	Flupentiofenox	C1=C(C(=CC(=C1F)OCCCCCSC(F)(F)F)S(=O)CC(F)(F)F)O	1	3	3	3	Good	4.28401	In	10	0	1
853	Flupropadine	CC(C)(C)C1CCN(CC1)CC#CC2=CC(=CC(=C2)C(F)(F)F)C(F)(F)F	1	3	3	3	Good	4.28401	In	10	0	1
854	Flupropadine hydrochloride	CC(C)(C)C1CCN(CC#CC2=CC(=CC(=C2)C(F)(F)F)C(F)(F)F)CC1	1	3	3	3	Good	4.28401	In	10	0	1
869	Flurprimidol	CC(C)C(C1=CC=C(C=C1)OC(F)(F)F)(C2=CN=CN=C2)O	1	3	3	3	Good	4.28401	In	10	0	1
871	Flusilazole	C[Si](CN1C=NC=N1)(C2=CC=C(C=C2)F)C3=CC=C(C=C3)F	1	3	3	3	Good	4.28401	In	10	0	1
872	Flusulfamide	C1=CC(=C(C=C1[N+](=O)[O-])Cl)NS(=O)(=O)C2=CC(=C(C=C2)Cl)C(F)(F)F	1	3	3	3	Good	4.28401	In	10	0	1
877	Flutriafol	C1=CC=C(C(=C1)C(CN2C=NC=N2)(C3=CC=C(C=C3)F)O)F	1	3	3	3	Good	4.28401	In	10	0	1
887	Formaldehyde	C=O	1	3	3	3	Good	4.28401	In	10	0	1
893	Fosetyl	CCOP(=O)=O	1	3	3	3	Good	4.28401	In	10	0	1
895	Fospirate	COP(=O)(OC)OC1=NC(=C(C=C1Cl)Cl)Cl	1	3	3	3	Good	4.28401	In	10	0	1
898	Fuberidazole	C1=CC=C2C(=C1)NC(=N2)C3=CC=CO3	1	3	3	3	Good	4.28401	In	10	0	1
909	Furfural	C1=COC(=C1)C=O	1	3	3	3	Good	4.28401	In	10	0	1
914	Gliftor	OC(CF)CF	1	3	3	3	Good	4.28401	In	10	0	1
917	Glutaraldehyde	C(CC=O)CC=O	1	3	3	3	Good	4.28401	In	10	0	1
918	Glycerin	C(C(CO)O)O	1	3	3	3	Good	4.28401	In	10	0	1
930	Gypsum	O.O.[O-]S(=O)(=O)[O-]	1	3	3	3	Good	4.28401	In	10	0	1
950	Hexachlorobenzene	C1(=C(C(=C(C(=C1Cl)Cl)Cl)Cl)Cl)Cl	1	3	3	3	Good	4.28401	In	10	0	1
951	Hexachlorophene	C1=C(C(=C(C(=C1Cl)Cl)CC2=C(C(=CC(=C2Cl)Cl)Cl)O)O)Cl	1	3	3	3	Good	4.28401	In	10	0	1
952	Hexaconazole	CCCCC(CN1C=NC=N1)(C2=C(C=C(C=C2)Cl)Cl)O	1	3	3	3	Good	4.28401	In	10	0	1
955	Hexaflurate	F[As-](F)(F)(F)(F)F	1	3	3	3	Good	4.28401	In	10	0	1
957	Hexylene glycol	CC(CC(C)(C)O)O	1	3	3	3	Good	4.28401	In	10	0	1
960	Huanjunzuo	C1CC[C@H]([C@@](CC1)(C2=CC=C(C=C2)Cl)O)N3C=NC=N3	1	3	3	3	Good	4.28401	In	10	0	1
963	Hydroquinone	C1=CC(=CC=C1O)O	1	3	3	3	Good	4.28401	In	10	0	1
992	Indaziflam	CC1CC2=C(C1NC3=NC(=NC(=N3)N)C(C)F)C=C(C=C2)C	1	3	3	3	Good	4.28401	In	10	0	1
1000	Iodomethane	CI	1	3	3	3	Good	4.28401	In	10	0	1
1005	Ioxynil	C1=C(C=C(C(=C1I)O)I)C#N	1	3	3	3	Good	4.28401	In	10	0	1
1007	Ipazine	CCN(CC)C1=NC(=NC(=N1)NC(C)C)Cl	1	3	3	3	Good	4.28401	In	10	0	1
1008	Ipconazole	CC(C)C1CCC(C1(CN2C=NC=N2)O)CC3=CC=C(C=C3)Cl	1	3	3	3	Good	4.28401	In	10	0	1
1010	Ipfentrifluconazole	CC(C)C(CN1C=NC=N1)(C2=C(C=C(C=C2)OC3=CC=C(C=C3)Cl)C(F)(F)F)O	1	3	3	3	Good	4.28401	In	10	0	1
1011	Ipflufenoquin	CC1=C(C=C2C=CC(=C(C2=N1)F)F)OC3=C(C(=CC=C3)F)C(C)(C)O	1	3	3	3	Good	4.28401	In	10	0	1
1036	Isopropalin	CCCN(CCC)C1=C(C=C(C=C1[N+](=O)[O-])C(C)C)[N+](=O)[O-]	1	3	3	3	Good	4.28401	In	10	0	1
1041	Isopyrimol	CC(C)C(C1=CC=C(C=C1)Cl)(C2=CN=CN=C2)O	1	3	3	3	Good	4.28401	In	10	0	1
1056	Kaolin	O=[Al]O[Si](=O)O[Si](=O)O[Al]=O	1	3	3	3	Good	4.28401	In	10	0	1
1069	Lead arsenate	O[As](=O)([O-])[O-]	1	3	3	3	Good	4.28401	In	10	0	1
1072	Lime sulphur	[S-]SSS[S-]	1	3	3	3	Good	4.28401	In	10	0	1
1074	Lindane	C1(C(C(C(C(C1Cl)Cl)Cl)Cl)Cl)Cl	1	3	3	3	Good	4.28401	In	10	0	1
1076	Lithium perfluorooctane sulfonate	C(C(C(C(C(F)(F)S(=O)(=O)[O-])(F)F)(F)F)(F)F)(C(C(C(F)(F)F)(F)F)(F)F)(F)F	1	3	3	3	Good	4.28401	In	10	0	1
1090	Mazidox	CN(C)P(=O)(N=[N+]=[N-])N(C)C	1	3	3	3	Good	4.28401	In	10	0	1
1117	Medetomidine	CC1=C(C(=CC=C1)C(C)C2=CN=CN2)C	1	3	3	3	Good	4.28401	In	10	0	1
1118	Medinoterb	CC1=C(C=C(C(=C1[N+](=O)[O-])O)C(C)(C)C)[N+](=O)[O-]	1	3	3	3	Good	4.28401	In	10	0	1
1123	Mefentrifluconazole	CC(CN1C=NC=N1)(C2=C(C=C(C=C2)OC3=CC=C(C=C3)Cl)C(F)(F)F)O	1	3	3	3	Good	4.28401	In	10	0	1
1126	Mepanipyrim	CC#CC1=CC(=NC(=N1)NC2=CC=CC=C2)C	1	3	3	3	Good	4.28401	In	10	0	1
1130	Mepiquat	C[N+]1(CCCCC1)C	1	3	3	3	Good	4.28401	In	10	0	1
1149	Metconazole	CC1(CCC(C1(CN2C=NC=N2)O)CC3=CC=C(C=C3)Cl)C	1	3	3	3	Good	4.28401	In	10	0	1
1150	Metepa	CC1CN1P(=O)(N2CC2C)N3CC3C	1	3	3	3	Good	4.28401	In	10	0	1
1167	Methoxychlor	COC1=CC=C(C=C1)C(C2=CC=C(C=C2)OC)C(Cl)(Cl)Cl	1	3	3	3	Good	4.28401	In	10	0	1
1173	Methyl isothiocyanate	CN=C=S	1	3	3	3	Good	4.28401	In	10	0	1
1176	Methylarsenic sulphide	C[As]=S	1	3	3	3	Good	4.28401	In	10	0	1
1177	Methylarsonic acid	C[As](=O)(O)O	1	3	3	3	Good	4.28401	In	10	0	1
1179	Methylene bisthiocyanate	C(SC#N)SC#N	1	3	3	3	Good	4.28401	In	10	0	1
1189	Metosulam	CC1=C(C(=C(C=C1)Cl)NS(=O)(=O)C2=NN3C(=CC(=NC3=N2)OC)OC)Cl	1	3	3	3	Good	4.28401	In	10	0	1
1200	Mipafox	CC(C)NP(=O)(NC(C)C)F	1	3	3	3	Good	4.28401	In	10	0	1
1201	Mirex	C12(C3(C4(C5(C3(C(C1(C5(C2(C4(Cl)Cl)Cl)Cl)Cl)(Cl)Cl)Cl)Cl)Cl)Cl)Cl	1	3	3	3	Good	4.28401	In	10	0	1
1209	Monosodium methylarsonate	C[As](=O)(O)[O-]	1	3	3	3	Good	4.28401	In	10	0	1
1218	Myclobutanil	CCCCC(CN1C=NC=N1)(C#N)C2=CC=C(C=C2)Cl	1	3	3	3	Good	4.28401	In	10	0	1
1219	Myclobutanil hydrochloride	CC(CCC(CN1C=NC=N1)(C#N)C2=CC=C(C=C2)Cl)O	1	3	3	3	Good	4.28401	In	10	0	1
1226	Naled	COP(=O)(OC)OC(C(Cl)(Cl)Br)Br	1	3	3	3	Good	4.28401	In	10	0	1
1227	Nanosilver-silica composite	C1=CC=C2C=CC=CC2=C1	1	3	3	3	Good	4.28401	In	10	0	1
1228	Naphthalene	C1=CC=C2C=CC=CC2=C1	1	3	3	3	Good	4.28401	In	10	0	1
1240	Nitralin	CCCN(CCC)C1=C(C=C(C=C1[N+](=O)[O-])S(=O)(=O)C)[N+](=O)[O-]	1	3	3	3	Good	4.28401	In	10	0	1
1241	Nitrapyrin	C1=CC(=NC(=C1)Cl)C(Cl)(Cl)Cl	1	3	3	3	Good	4.28401	In	10	0	1
1243	Nitrofen	C1=CC(=CC=C1[N+](=O)[O-])OC2=C(C=C(C=C2)Cl)Cl	1	3	3	3	Good	4.28401	In	10	0	1
1248	N-nitrosodimethylamine	CN(C)N=O	1	3	3	3	Good	4.28401	In	10	0	1
1251	Nornicotine	C1CC(NC1)C2=CN=CC=C2	1	3	3	3	Good	4.28401	In	10	0	1
1255	Nuarimol	C1=CC=C(C(=C1)C(C2=CC=C(C=C2)F)(C3=CN=CN=C3)O)Cl	1	3	3	3	Good	4.28401	In	10	0	1
1256	O,O'-DDT	C1=CC=C(C(=C1)C(C2=CC=CC=C2Cl)C(Cl)(Cl)Cl)Cl	1	3	3	3	Good	4.28401	In	10	0	1
1257	O,P'-DDT	C1=CC=C(C(=C1)C(C2=CC=C(C=C2)Cl)C(Cl)(Cl)Cl)Cl	1	3	3	3	Good	4.28401	In	10	0	1
1266	Oryzalin	CCCN(CCC)C1=C(C=C(C=C1[N+](=O)[O-])S(=O)(=O)N)[N+](=O)[O-]	1	3	3	3	Good	4.28401	In	10	0	1
1275	Oxazosulfyl	CCS(=O)(=O)C1=C(N=CC=C1)C2=NC3=C(O2)C=CC(=C3)S(=O)(=O)C(F)(F)F	1	3	3	3	Good	4.28401	In	10	0	1
1276	Oxine-copper	[O-]C1=CC=CC2=C1N=CC=C2	1	3	3	3	Good	4.28401	In	10	0	1
1283	Oxyfluorfen	CCOC1=C(C=CC(=C1)OC2=C(C=C(C=C2)C(F)(F)F)Cl)[N+](=O)[O-]	1	3	3	3	Good	4.28401	In	10	0	1
1285	Paraquat	C[N+]1=CC=C(C=C1)C2=CC=[N+](C=C2)C	1	3	3	3	Good	4.28401	In	10	0	1
1288	Parinol	C1=CC(=CN=C1)C(C2=CC=C(C=C2)Cl)(C3=CC=C(C=C3)Cl)O	1	3	3	3	Good	4.28401	In	10	0	1
1291	Penconazole	CCCC(CN1C=NC=N1)C2=C(C=C(C=C2)Cl)Cl	1	3	3	3	Good	4.28401	In	10	0	1
1293	Pendimethalin	CCC(CC)NC1=C(C=C(C(=C1[N+](=O)[O-])C)C)[N+](=O)[O-]	1	3	3	3	Good	4.28401	In	10	0	1
1296	Penoxsulam	COC1=CN=C(N2C1=NC(=N2)NS(=O)(=O)C3=C(C=CC=C3OCC(F)F)C(F)(F)F)OC	1	3	3	3	Good	4.28401	In	10	0	1
1297	Pentachlorophenol	C1(=C(C(=C(C(=C1Cl)Cl)Cl)Cl)Cl)O	1	3	3	3	Good	4.28401	In	10	0	1
1301	Perfluidone	CC1=C(C=CC(=C1)S(=O)(=O)C2=CC=CC=C2)NS(=O)(=O)C(F)(F)F	1	3	3	3	Good	4.28401	In	10	0	1
1311	Phenylmercury chloride	C1=CC=C(C=C1)[Hg]Cl	1	3	3	3	Good	4.28401	In	10	0	1
1312	Phenylmercury nitrate	C1=CC=C(C=C1)[Hg]O[N+](=O)[O-]	1	3	3	3	Good	4.28401	In	10	0	1
1317	Phosdiphen	CCOP(=O)(OC1=C(C=C(C=C1)Cl)Cl)OC2=C(C=C(C=C2)Cl)Cl	1	3	3	3	Good	4.28401	In	10	0	1
1322	Phosphane	P	1	3	3	3	Good	4.28401	In	10	0	1
1336	Piperonyl sulfoxide	CCCCCCCCS(=O)C(C)CC1=CC2=C(C=C1)OCO2	1	3	3	3	Good	4.28401	In	10	0	1
1344	P-nonylphenol	CCCCCCCCCC1=CC=C(C=C1)O	1	3	3	3	Good	4.28401	In	10	0	1
1353	Procyazine	CC(C)(C#N)NC1=NC(=NC(=N1)NC2CC2)Cl	1	3	3	3	Good	4.28401	In	10	0	1
1355	Prodiamine	CCCN(CCC)C1=C(C=C(C(=C1[N+](=O)[O-])N)C(F)(F)F)[N+](=O)[O-]	1	3	3	3	Good	4.28401	In	10	0	1
1358	Profluralin	CCCN(CC1CC1)C2=C(C=C(C=C2[N+](=O)[O-])C(F)(F)F)[N+](=O)[O-]	1	3	3	3	Good	4.28401	In	10	0	1
1367	Prometon	CC(C)NC1=NC(=NC(=N1)OC)NC(C)C	1	3	3	3	Good	4.28401	In	10	0	1
1368	Prometryn	CC(C)NC1=NC(=NC(=N1)SC)NC(C)C	1	3	3	3	Good	4.28401	In	10	0	1
1375	Propargite	CC(C)(C)C1=CC=C(C=C1)OC2CCCCC2OS(=O)OCC#C	1	3	3	3	Good	4.28401	In	10	0	1
1376	Propazine	CC(C)NC1=NC(=NC(=N1)Cl)NC(C)C	1	3	3	3	Good	4.28401	In	10	0	1
1386	Propylene glycol	CC(CO)O	1	3	3	3	Good	4.28401	In	10	0	1
1397	Protrifenbute	C1CC1C(CCCC2=CC(=C(C=C2)F)OC3=CC=CC=C3)C4=CC=C(C=C4)Cl	1	3	3	3	Good	4.28401	In	10	0	1
1406	Pyraclonil	CN(CC#C)C1=C(C=NN1C2=NN3CCCCC3=C2Cl)C#N	1	3	3	3	Good	4.28401	In	10	0	1
1409	Pyrafluprole	C1=CN=C(C=N1)CNC2=C(C(=NN2C3=C(C=C(C=C3Cl)C(F)(F)F)Cl)C#N)SCF	1	3	3	3	Good	4.28401	In	10	0	1
1416	Pyrazachlor	CC1=C(C(=NN1)Cl)[N+](=O)[O-]	1	3	3	3	Good	4.28401	In	10	0	1
1429	Pyridachlometyl	CC1=C(C(=C(N=N1)Cl)C2=C(C=CC=C2F)F)C3=CC=CC=C3	1	3	3	3	Good	4.28401	In	10	0	1
1438	Pyrimethanil	CC1=CC(=NC(=N1)NC2=CC=CC=C2)C	1	3	3	3	Good	4.28401	In	10	0	1
1445	Pyripropanol	C1=CC=NC(=C1)CCCO	1	3	3	3	Good	4.28401	In	10	0	1
1446	Pyriproxyfen	CC(COC1=CC=C(C=C1)OC2=CC=CC=C2)OC3=CC=CC=N3	1	3	3	3	Good	4.28401	In	10	0	1
1447	Pyrisoxazole	CC1(CC(ON1C)C2=CC=C(C=C2)Cl)C3=CN=CC=C3	1	3	3	3	Good	4.28401	In	10	0	1
1451	Pyroxsulam	COC1=CC(=NC2=NC(=NN12)NS(=O)(=O)C3=C(C=CN=C3OC)C(F)(F)F)OC	1	3	3	3	Good	4.28401	In	10	0	1
1462	Quinoxyfen	C1=CC(=CC=C1OC2=C3C(=CC(=CC3=NC=C2)Cl)Cl)F	1	3	3	3	Good	4.28401	In	10	0	1
1464	Quintozene	C1(=C(C(=C(C(=C1Cl)Cl)Cl)Cl)Cl)[N+](=O)[O-]	1	3	3	3	Good	4.28401	In	10	0	1
1467	Rabenzazole	CC1=CC(=NN1C2=NC3=CC=CC=C3N2)C	1	3	3	3	Good	4.28401	In	10	0	1
1470	Rimisoxafen	C1=CC(=C(C(=C1)Cl)C2=CC(=NO2)C(F)F)OC3=NC=C(C=N3)Cl	1	3	3	3	Good	4.28401	In	10	0	1
1473	Saisentong	C(NC1=NN=C(S1)[S-])NC2=NN=C(S2)[S-]	1	3	3	3	Good	4.28401	In	10	0	1
1475	Schradan	CN(C)P(=O)(N(C)C)OP(=O)(N(C)C)N(C)C	1	3	3	3	Good	4.28401	In	10	0	1
1476	Seboctylamine	CCCCCCCCNCCNCCNCCCCCCCC	1	3	3	3	Good	4.28401	In	10	0	1
1477	Sebuthylazine	CCC(C)NC1=NC(=NC(=N1)NCC)Cl	1	3	3	3	Good	4.28401	In	10	0	1
1478	Secbumeton	CCC(C)NC1=NC(=NC(=N1)NCC)OC	1	3	3	3	Good	4.28401	In	10	0	1
1480	Semiamitraz hydrochloride	C\N=C/Nc1ccc(C)cc1C	1	3	3	3	Good	4.28401	In	10	0	1
1485	Silafluofen	CCOC1=CC=C(C=C1)[Si](C)(C)CCCC2=CC(=C(C=C2)F)OC3=CC=CC=C3	1	3	3	3	Good	4.28401	In	10	0	1
1486	Silatrane	C1CO[Si]2(OCCN1CCO2)C3=CC=C(C=C3)Cl	1	3	3	3	Good	4.28401	In	10	0	1
1487	Silica	O=[Si]=O	1	3	3	3	Good	4.28401	In	10	0	1
1489	Simazine	CCNC1=NC(=NC(=N1)Cl)NCC	1	3	3	3	Good	4.28401	In	10	0	1
1490	Simeconazole	C[Si](C)(C)CC(CN1C=NC=N1)(C2=CC=C(C=C2)F)O	1	3	3	3	Good	4.28401	In	10	0	1
1491	Simeton	CCNC1=NC(=NC(=N1)OC)NCC	1	3	3	3	Good	4.28401	In	10	0	1
1492	Simetryn	CCNC1=NC(=NC(=N1)SC)NCC	1	3	3	3	Good	4.28401	In	10	0	1
1496	Sodium 5-nitroguaiacolate	COC1=C(C=C(C=C1)[N+](=O)[O-])[O-]	1	3	3	3	Good	4.28401	In	10	0	1
1498	Sodium hexafluorosilicate	F[Si-2](F)(F)(F)(F)F	1	3	3	3	Good	4.28401	In	10	0	1
1499	Sodium lignosulfonate	COC1=CC=CC(=C1O)CC(CS(=O)(=O)[O-])OC2=C(C=C(C=C2)CCCS(=O)(=O)[O-])OC	1	3	3	3	Good	4.28401	In	10	0	1
1500	Sodium metabisulphite	COC1=CC=CC(=C1O)C[C@H](CS(=O)(=O)[O-])OC2=C(C=C(C=C2)CCCS(=O)(=O)[O-])OC	1	3	3	3	Good	4.28401	In	10	0	1
1503	Sodium o-nitrophenolate	C1=CC=C(C(=C1)[N+](=O)[O-])[O-]	1	3	3	3	Good	4.28401	In	10	0	1
1504	Sodium p-nitrophenolate	C1=CC(=CC=C1[N+](=O)[O-])[O-]	1	3	3	3	Good	4.28401	In	10	0	1
1505	Sodium silver thiosulphate	[O-]S([O-])(=O)=S	1	3	3	3	Good	4.28401	In	10	0	1
1506	Sodium tetraborate pentahydrate	OB(O)O	1	3	3	3	Good	4.28401	In	10	0	1
1508	Sorbitol	C(C(C(C(C(CO)O)O)O)O)O	1	3	3	3	Good	4.28401	In	10	0	1
1523	Sulfluramid	CCNS(=O)(=O)C(C(C(C(C(C(C(C(F)(F)F)(F)F)(F)F)(F)F)(F)F)(F)F)(F)F)(F)F	1	3	3	3	Good	4.28401	In	10	0	1
1528	Sulfoxaflor	CC(C1=CN=C(C=C1)C(F)(F)F)S(=NC#N)(=O)C	1	3	3	3	Good	4.28401	In	10	0	1
1529	Sulfuryl fluoride	O=S(=O)(F)F	1	3	3	3	Good	4.28401	In	10	0	1
1530	Sulphaquinoxaline	C1=CC=C2C(=C1)N=CC(=N2)NS(=O)(=O)C3=CC=C(C=C3)N	1	3	3	3	Good	4.28401	In	10	0	1
1531	Sulphuric acid	OS(=O)(=O)O	1	3	3	3	Good	4.28401	In	10	0	1
1538	Tebuconazole	CC(C)(C)C(CCC1=CC=C(C=C1)Cl)(CN2C=NC=N2)O	1	3	3	3	Good	4.28401	In	10	0	1
1546	Tecnazene	C1=C(C(=C(C(=C1Cl)Cl)[N+](=O)[O-])Cl)Cl	1	3	3	3	Good	4.28401	In	10	0	1
1558	Terbumeton	CCNC1=NC(=NC(=N1)OC)NC(C)(C)C	1	3	3	3	Good	4.28401	In	10	0	1
1559	Terbuthylazine	CCNC1=NC(=NC(=N1)Cl)NC(C)(C)C	1	3	3	3	Good	4.28401	In	10	0	1
1560	Terbutryn	CCNC1=NC(=NC(=N1)SC)NC(C)(C)C	1	3	3	3	Good	4.28401	In	10	0	1
1561	Tetcyclacis	C1C2C3C(C1C4C2N=NN4C5=CC=C(C=C5)Cl)N=N3	1	3	3	3	Good	4.28401	In	10	0	1
1565	Tetradifon	CCOP(=O)(OCC)OP(=O)(OCC)OCC	1	3	3	3	Good	4.28401	In	10	0	1
1566	Tetraethyl pyrophosphate	CCOP(=O)(OCC)OP(=O)(OCC)OCC	1	3	3	3	Good	4.28401	In	10	0	1
1570	Tetrasul	C1=CC(=CC=C1SC2=CC(=C(C=C2Cl)Cl)Cl)Cl	1	3	3	3	Good	4.28401	In	10	0	1
1573	Thiabendazole	C1=CC=C2C(=C1)NC(=N2)C3=CSC=N3	1	3	3	3	Good	4.28401	In	10	0	1
1579	Thicyofen	CCS(=O)C1=C(C(=C(S1)C#N)Cl)C#N	1	3	3	3	Good	4.28401	In	10	0	1
1588	Thiocyclam oxalate	CN(C)C1CSSSC1	1	3	3	3	Good	4.28401	In	10	0	1
1597	Thiosultap	CN(C)C(CSS(=O)(=O)O)CSS(=O)(=O)O	1	3	3	3	Good	4.28401	In	10	0	1
1598	Thiourea	C(=S)(N)N	1	3	3	3	Good	4.28401	In	10	0	1
1606	Tioxazafen	C1=CC=C(C=C1)C2=NOC(=N2)C3=CC=CS3	1	3	3	3	Good	4.28401	In	10	0	1
1608	Titanium dioxide	O=[Ti]=O	1	3	3	3	Good	4.28401	In	10	0	1
1613	Toluene 2,4-diisocyanate	CC1=C(C=C(C=C1)N=C=O)N=C=O	1	3	3	3	Good	4.28401	In	10	0	1
1614	Tolylfluanid	CC1=CC=C(C=C1)N(SC(F)(Cl)Cl)S(=O)(=O)N(C)C	1	3	3	3	Good	4.28401	In	10	0	1
1619	Tralopyril	C1=CC(=CC=C1C2=C(C(=C(N2)C(F)(F)F)Br)C#N)Cl	1	3	3	3	Good	4.28401	In	10	0	1
1624	Triacontanol	CCCCCCCCCCCCCCCCCCCCCCCCCCCCCCO	1	3	3	3	Good	4.28401	In	10	0	1
1626	Triadimenol	CC(C)(C)C(C(N1C=NC=N1)OC2=CC=C(C=C2)Cl)O	1	3	3	3	Good	4.28401	In	10	0	1
1629	Triamiphos	CN(C)P(=O)(N1C(=NC(=N1)C2=CC=CC=C2)N)N(C)C	1	3	3	3	Good	4.28401	In	10	0	1
1631	Triarathene	C1=CC=C(C=C1)C2=C(SC(=C2)C3=CC=C(C=C3)Cl)C4=CC=CC=C4	1	3	3	3	Good	4.28401	In	10	0	1
1632	Triarimol	C1=CC=C(C=C1)C(C2=C(C=C(C=C2)Cl)Cl)(C3=CN=CN=C3)O	1	3	3	3	Good	4.28401	In	10	0	1
1635	Triaziflam	CC1=CC(=CC(=C1)OCC(C)NC2=NC(=NC(=N2)N)C(C)(C)F)C	1	3	3	3	Good	4.28401	In	10	0	1
1637	Triazoxide	C1=CC2=C(C=C1Cl)[N+](=NC(=N2)N3C=CN=C3)[O-]	1	3	3	3	Good	4.28401	In	10	0	1
1641	Tributyltin oxide	CCCC[Sn](CCCC)(CCCC)O[Sn](CCCC)(CCCC)CCCC	1	3	3	3	Good	4.28401	In	10	0	1
1644	Trichlorfon	COP(=O)(C(C(Cl)(Cl)Cl)O)OC	1	3	3	3	Good	4.28401	In	10	0	1
1650	Tricyclazole	CC1=C2C(=CC=C1)SC3=NN=CN23	1	3	3	3	Good	4.28401	In	10	0	1
1653	Trietazine	CCNC1=NC(=NC(=N1)Cl)N(CC)CC	1	3	3	3	Good	4.28401	In	10	0	1
1663	Trifluralin	CCCN(CCC)C1=C(C=C(C=C1[N+](=O)[O-])C(F)(F)F)[N+](=O)[O-]	1	3	3	3	Good	4.28401	In	10	0	1
1667	Triforine	C1CN(CCN1C(C(Cl)(Cl)Cl)NC=O)C(C(Cl)(Cl)Cl)NC=O	1	3	3	3	Good	4.28401	In	10	0	1
1668	Triisopropanolamine	CC(CN(CC(C)O)CC(C)O)O	1	3	3	3	Good	4.28401	In	10	0	1
1677	Umifoxolaner	C1C=NO[C@@]1(c1cc(c(c(c1)Cl)F)C(F)(F)F)CF	1	3	3	3	Good	4.28401	In	10	0	1
1689	Xylene	CC1=CC=CC=C1C	1	3	3	3	Good	4.28401	In	10	0	1
274	Butyl stearate	CCCCCCCCCCCCCCCCCC(=O)OCCCC	1	3	3	3	Good	4.28314	In	10	0.000703	0.998658
399	Climbazole	CC(C)(C)C(=O)C(N1C=CN=C1)OC2=CC=C(C=C2)Cl	1	3	3	3	Good	4.27248	In	10	0.00929858	0.982242
225	Bixlozone	CC1(CON(C1=O)CC2=C(C=C(C=C2)Cl)Cl)C	1	3	3	3	Good	4.27157	In	10	0.0100309	0.980843
1452	Quinacetol	CC(=O)C1=C2C=CC=NC2=C(C=C1)O	1	3	3	3	Good	4.27133	In	10	0.0102265	0.98047
772	Fenuron-TCA	C[NH+](C)C(=O)NC1=CC=CC=C1	1	3	3	3	Good	4.27048	In	10	0.0109083	0.979168
1292	Pencycuron	C1CCC(C1)N(CC2=CC=C(C=C2)Cl)C(=O)NC3=CC=CC=C3	1	3	3	3	Good	4.269	In	10	0.0121014	0.976889
991	Indazapyroxamet	CC1(CC1)NC(=O)C2=CC=CC3=NN(C=C32)C4=CN=CC=C4	1	3	3	3	Good	4.26819	In	10	0.0127504	0.97565
729	Fenhexamid	CC1(CCCCC1)C(=O)NC2=C(C(=C(C=C2)O)Cl)Cl	1	3	3	3	Good	4.26797	In	10	0.0129322	0.975303
1037	Isopropyl myristate	CCCCCCCCCCCCCC(=O)OC(C)C	1	3	3	3	Good	4.26565	In	10	0.0148004	0.971735
1666	Trifopsime	CC(C(=O)ON=C(C)C)OC1=CC=C(C=C1)OC2=CC=C(C=C2)C(F)(F)F	1	3	3	3	Good	4.26362	In	10	0.0164386	0.968606
1372	Propanil	CCC(=O)NC1=CC(=C(C=C1)Cl)Cl	1	3	3	3	Good	4.26211	In	10	0.0176544	0.966284
701	Ethylene urea	C1CNC(=O)N1	1	3	3	3	Good	4.26052	In	10	0.0189381	0.963833
1453	Quinacetol sulphate	CC(=O)C1=C2C=CC=NC2=C(C=C1)O.CC(=O)C1=C2C=CC=NC2=C(C=C1)O.OS(=O)(=O)O	1	3	3	3	Good	4.25864	In	10	0.0204531	0.96094
1688	Xylachlor	CC1=C(C(=CC=C1)N(C(C)C)C(=O)CCl)C	1	3	3	3	Good	4.25834	In	10	0.020693	0.960481
874	Fluthiacet-methyl	COC(=O)CSC1=C(C=C(C(=C1)N=C2N3CCCCN3C(=O)S2)F)Cl	1	3	3	3	Good	4.25681	In	10	0.0219261	0.958126
1369	Propachlor	CC(C)N(C1=CC=CC=C1)C(=O)CCl	1	3	3	3	Good	4.25247	In	10	0.0254275	0.95144
1106	Mebenil	CC1=CC=CC=C1C(=O)NC2=CC=CC=C2	1	3	3	3	Good	4.25079	In	10	0.0267784	0.94886
1605	Tiorantraniliprole	CC(C)NC(=S)C1=C(C(=CC(=C1)Cl)Cl)NC(=O)C2=CC(=NN2C3=C(C=CC=N3)Cl)Br	1	3	3	3	Good	4.24872	In	10	0.0284458	0.945675
169	Benodanil	C1=CC=C(C=C1)NC(=O)C2=CC=CC=C2I	1	3	3	3	Good	4.24699	In	10	0.0298464	0.943001
307	Carpropamid	CCC1(C(C1(Cl)Cl)C)C(=O)NC(C)C2=CC=C(C=C2)Cl	1	3	3	3	Good	4.2417	In	10	0.0341074	0.934863
911	Furmecyclox	CC1=CC(=C(O1)C)C(=O)N(C2CCCCC2)OC	1	3	3	3	Good	4.24114	In	10	0.034562	0.933995
1325	Picarbutrazox	CC(C)(C)OC(=O)NC1=CC=CC(=N1)CON=C(C2=CC=CC=C2)C3=NN=NN3C	1	3	3	3	Good	4.24096	In	10	0.034706	0.93372
1625	Triadimefon	CC(C)(C)C(=O)C(N1C=NC=N1)OC2=CC=C(C=C2)Cl	1	3	3	3	Good	4.24076	In	10	0.034865	0.933416
599	Dimoxystrobin	CC1=CC(=C(C=C1)C)OCC2=CC=CC=C2C(=NOC)C(=O)NC	1	3	3	3	Good	4.23994	In	10	0.0355277	0.932151
1484	Siduron	CC1CCCCC1NC(=O)NC2=CC=CC=C2	1	3	3	3	Good	4.23935	In	10	0.0360012	0.931246
1194	Metsulfovax	CC1=C(SC(=N1)C)C(=O)NC2=CC=CC=C2	1	3	3	3	Good	4.23905	In	10	0.0362474	0.930776
1389	Proquinazid	CCCN1C(=O)C2=C(C=CC(=C2)I)N=C1OCCC	1	3	3	3	Good	4.23364	In	10	0.335021	0.533051
1039	Isoproturon	CC(C)C1=CC=C(C=C1)NC(=O)N(C)C	1	3	3	3	Good	4.23106	In	10	0.0426875	0.918477
1049	Isoxadifen ethyl	CCOC(=O)C1=NOC(C1)(C2=CC=CC=C2)C3=CC=CC=C3	1	3	3	3	Good	4.23035	In	10	0.043257	0.917389
1131	Mepronil	CC1=CC=CC=C1C(=O)NC2=CC(=CC=C2)OC(C)C	1	3	3	3	Good	4.22988	In	10	0.0436344	0.916669
1571	Thenylchlor	CC1=C(C(=CC=C1)C)N(CC2=C(C=CS2)OC)C(=O)CCl	1	3	3	3	Good	4.22975	In	10	0.0437394	0.916468
771	Fenuron	CN(C)C(=O)NC1=CC=CC=C1	1	3	3	3	Good	4.22819	In	10	0.0449968	0.914067
1120	Mefenacet	CN(C1=CC=CC=C1)C(=O)COC2=NC3=CC=CC=C3S2	1	3	3	3	Good	4.22784	In	10	0.0452786	0.913529
1178	Methyldymron	CC(C)(C1=CC=CC=C1)NC(=O)N(C)C2=CC=CC=C2	1	3	3	3	Good	4.22296	In	10	0.0492188	0.906004
1156	Methfuroxam	CC1=C(OC(=C1C(=O)NC2=CC=CC=C2)C)C	1	3	3	3	Good	4.22201	In	10	0.0499775	0.904555
249	Bromuron	CN(C)C(=O)NC1=CC=C(C=C1)Br	1	3	3	3	Good	4.22167	In	10	0.0502531	0.904029
1440	Pyriminobac-methyl	CC(=NOC)C1=C(C(=CC=C1)OC2=NC(=CC(=N2)OC)OC)C(=O)OC	1	3	3	3	Good	4.21993	In	10	0.051661	0.90134
1145	Metazachlor	CC1=C(C(=CC=C1)C)N(CN2C=CC=N2)C(=O)CCl	1	3	3	3	Good	4.21803	In	10	0.0531907	0.898419
1233	Neburon	CCCCN(C)C(=O)NC1=CC(=C(C=C1)Cl)Cl	1	3	3	3	Good	4.21205	In	10	0.0580114	0.889212
728	Fenfuram	CC1=C(C=CO1)C(=O)NC2=CC=CC=C2	1	3	3	3	Good	4.20999	In	10	0.0596738	0.886037
1212	Monuron	CN(C)C(=O)NC1=CC=C(C=C1)Cl	1	3	3	3	Good	4.20758	In	10	0.0616159	0.882328
1348	Pretilachlor	CCCN(CCOC1=C(C=C(C=C1Cl)Cl)Cl)C(=O)N2C=CN=C2	1	3	3	3	Good	4.20707	In	10	0.0620221	0.881553
1332	Pinoxaden	CCC1=CC(=CC(=C1C2=C(N3CCOCCN3C2=O)OC(=O)C(C)(C)C)CC)C	1	3	3	3	Good	4.20615	In	10	0.324337	0.545355
1151	Methabenzthiazuron	CNC(=O)N(C)C1=NC2=CC=CC=C2S1	1	3	3	3	Good	4.20369	In	10	0.0647469	0.876349
971	Imazamethabenz-methyl	COC(=O)c1ccc(C)cc1C1=NC(C)(C(C)C)C(=O)N1	1	3	3	3	Good	4.20189	In	10	0.0661995	0.873575
367	Chlorotoluron	CC1=C(C=C(C=C1)NC(=O)N(C)C)Cl	1	3	3	3	Good	4.20175	In	10	0.0663136	0.873357
849	Fluoxytioconazole	C1=CC(=CC=C1C#N)OC2=CN=C(C=C2)C(C(CN3C(=S)N=CN3)(C4=C(C=C(C=C4)F)F)O)(F)F	1	3	3	3	Good	4.19985	In	10	0.067848	0.870427
1229	Naproanilide	CC(C(=O)NC1=CC=CC=C1)OC2=CC3=CC=CC=C3C=C2	1	3	3	3	Good	4.19914	In	10	0.0684199	0.869334
543	Dichlorvos	COP(=O)(OC)OC=C(Cl)Cl	1	3	3	3	Good	4.19912	In	10	0.0684327	0.86931
570	Difenoxuron	CN(C)C(=O)NC1=CC=C(C=C1)OC2=CC=C(C=C2)OC	1	3	3	3	Good	4.19888	In	10	0.0686229	0.868947
368	Chloroxuron	CN(C)C(=O)NC1=CC=C(C=C1)OC2=CC=C(C=C2)Cl	1	3	3	3	Good	4.19773	In	10	0.069552	0.867172
1154	Methasulfocarb	CNC(=O)SC1=CC=C(C=C1)OS(=O)(=O)C	1	3	3	3	Good	4.19088	In	10	0.0750775	0.85662
1399	Prynachlor	CC(C#C)N(C1=CC=CC=C1)C(=O)CCl	1	3	3	3	Good	4.18925	In	10	0.0763898	0.854114
1188	Metominostrobin	CNC(=O)C(=NOC)C1=CC=CC=C1OC2=CC=CC=C2	1	3	3	3	Good	4.18886	In	10	0.0767019	0.853518
1544	Tebuthiuron	CC(C)(C)C1=NN=C(S1)N(C)C(=O)NC	1	3	3	3	Good	4.18845	In	10	0.0770365	0.852879
1006	Ioxynil octanoate	CCCCCCCC(=O)OC1=C(C=C(C=C1I)C#N)I	1	3	3	3	Good	4.1863	In	10	0.0787679	0.849572
335	Chloreturon	CCOC1=C(C=C(C=C1)NC(=O)N(C)C)Cl	1	3	3	3	Good	4.18545	In	10	0.079454	0.848262
1191	Metoxuron	CN(C)C(=O)NC1=CC(=C(C=C1)OC)Cl	1	3	3	3	Good	4.18357	In	10	0.0809664	0.845374
497	Defenuron	CNC(=O)NC1=CC=CC=C1	1	3	3	3	Good	4.18356	In	10	0.0809791	0.845349
1051	Isoxapyrifop	CC(C(=O)N1CCCO1)OC2=CC=C(C=C2)OC3=C(C=C(C=N3)Cl)Cl	1	3	3	3	Good	4.18298	In	10	0.081444	0.844462
80	Alanycarb	CCOC(=O)CCN(CC1=CC=CC=C1)SN(C)C(=O)ON=C(C)SC	1	3	3	3	Good	4.1827	In	10	0.0816663	0.844037
595	Dimethyl(4-piperidinocarbonyloxy-2,5-xylyl)sulfonium toluene-4-sulfonate	C[S+](C)c1cc(C)c(OC(=O)N2CCCCC2)cc1C	1	3	3	3	Good	4.18156	In	10	0.0825904	0.842272
1192	Metrafenone	CC1=CC(=C(C(=C1C(=O)C2=C(C=CC(=C2C)Br)OC)OC)OC)OC	1	3	3	3	Good	4.18109	In	10	0.0829665	0.841554
1540	Tebufenpyrad	CCC1=NN(C(=C1Cl)C(=O)NCC2=CC=C(C=C2)C(C)(C)C)C	1	3	3	3	Good	4.18045	In	10	0.0834797	0.840574
1310	Phenylmercuric acetate	CC(=O)O[Hg]C1=CC=CC=C1	1	3	3	3	Good	4.1801	In	10	0.0837619	0.840035
638	Diuron	CN(C)C(=O)NC1=CC(=C(C=C1)Cl)Cl	1	3	3	3	Good	4.17989	In	10	0.0839376	0.839699
488	Daimuron	CC1=CC=C(C=C1)NC(=O)NC(C)(C)C2=CC=CC=C2	1	3	3	3	Good	4.17957	In	10	0.0841963	0.839205
1661	Triflumizole	CCCOCC(=NC1=C(C=C(C=C1)Cl)C(F)(F)F)N2C=CN=C2	1	3	3	3	Good	4.17956	In	10	0.315143	0.557808
1587	Thiocyclam	CC(=NOC(=O)N(C)SN(C)C(=O)ON=C(C)SC)SC	1	3	3	3	Good	4.17899	In	10	0.0846623	0.838315
1589	Thiodicarb	CC(=NOC(=O)N(C)SN(C)C(=O)ON=C(C)SC)SC	1	3	3	3	Good	4.17899	In	10	0.0846623	0.838315
1676	Tyclopyrazoflor	CCN(C1=CN(N=C1Cl)C2=CN=CC=C2)C(=O)CCSCCC(F)(F)F	1	3	3	3	Good	4.17813	In	10	0.0853556	0.836991
1600	Tiadinil	CC1=C(C=C(C=C1)NC(=O)C2=C(N=NS2)C)Cl	1	3	3	3	Good	4.17708	In	10	0.0861986	0.835382
557	Dicyclonon	CC1(CN2C(=O)CCC2(N(C1)C(=O)C(Cl)Cl)C)C	1	3	3	3	Good	4.17692	In	10	0.0863279	0.835134
177	Bentaluron	CC(C)NC(=O)NC1=NC2=CC=CC=C2S1	1	3	3	3	Good	4.1755	In	10	0.0874726	0.832948
44	24-epibrassinolide	CC(C)C(C)C(C(C(C)C1CCC2C1(CCC3C2COC(=O)C4C3(CC(C(C4)O)O)C)C)O)O	1	3	3	3	Good	4.17533	In	10	0.0876129	0.83268
966	Icaridin	CCC(C)OC(=O)N1CCCCC1CCO	1	3	3	3	Good	4.17477	In	10	0.088062	0.831823
848	Fluoxastrobin	CON=C(C1=CC=CC=C1OC2=C(C(=NC=N2)OC3=CC=CC=C3Cl)F)C4=NOCCO4	1	3	3	3	Good	4.17302	In	10	0.313066	0.560958
439	Cumyluron	CC(C)(C1=CC=CC=C1)NC(=O)NCC2=CC=CC=C2Cl	1	3	3	3	Good	4.17302	In	10	0.0894737	0.829127
1044	Isouron	CC(C)(C)C1=CC(=NO1)NC(=O)N(C)C	1	3	3	3	Good	4.17301	In	10	0.0894788	0.829117
767	Fentin acetate	CC(=O)O[Sn](C1=CC=CC=C1)(C2=CC=CC=C2)C3=CC=CC=C3	1	3	3	3	Good	4.17001	In	4	0.0916215	0.784173
172	Benquinox	C1=CC=C(C=C1)C(=O)NNC2=CC=C(C=C2)N=O	1	3	3	3	Good	4.16805	In	4	0.0900684	0.787053
264	Buthidazole	CC(C)(C)C1=NN=C(S1)N2C(CN(C2=O)C)O	1	3	3	3	Good	4.16143	In	4	0.0848246	0.796933
672	Ethaboxam	CCC1=C(SC(=N1)NCC)C(=O)NC(C#N)C2=CC=CS2	1	3	3	3	Good	4.16112	In	4	0.0845802	0.797399
273	Buturon	CC(C#C)N(C)C(=O)NC1=CC=C(C=C1)Cl	1	3	3	3	Good	4.1608	In	4	0.0843267	0.797884
245	Bromoxynil-octanoate	CCCCCCCC(=O)OC1=C(C=C(C=C1Br)C#N)Br	1	3	3	3	Good	4.16072	In	4	0.0842648	0.798002
67	Acibenzolar	C1=CC(=C2C(=C1)N=NS2)C(=O)S	1	3	3	3	Good	4.16028	In	4	0.0839087	0.798684
1019	Isobornyl thiocyanoacetate	CC1(C2CCC1(C(C2)OC(=O)CSC#N)C)C	1	3	3	3	Good	4.16003	In	4	0.0837132	0.799059
411	Clomeprop	CC1=C(C=CC(=C1Cl)OC(C)C(=O)NC2=CC=CC=C2)Cl	1	3	3	3	Good	4.15944	In	4	0.0832456	0.799957
198	Benzthiazuron	CNC(=O)NC1=NC2=CC=CC=C2S1	1	3	3	3	Good	4.15906	In	4	0.0829426	0.800539
348	Chlorfluren methyl	COC(=O)C1C2=CC=CC=C2C3=C1C=C(C=C3)Cl	1	3	3	3	Good	4.15878	In	4	0.0827231	0.800962
1575	Thiamethoxam	CN1COCN(C1=N[N+](=O)[O-])CC2=CN=C(S2)Cl	1	3	3	3	Good	4.15466	In	10	0.307641	0.569997
697	Ethylchlozate	CCOC(=O)CC1=C2C=C(C=CC2=NN1)Cl	1	3	3	3	Good	4.14683	In	4	0.0732479	0.819649
150	Azoluron	CCn1nccc1NC(=O)Nc2ccccc2	1	3	3	3	Good	4.14606	In	4	0.0726425	0.820872
989	Inabenfide	C1=CC=C(C=C1)C(C2=C(C=CC(=C2)Cl)NC(=O)C3=CC=NC=C3)O	1	3	3	3	Good	4.14363	In	4	0.0707185	0.824785
1269	Oxadiazon	CC(C)OC1=C(C=C(C(=C1)N2C(=O)OC(=N2)C(C)(C)C)Cl)Cl	1	3	3	3	Good	4.14282	In	4	0.0700686	0.826116
956	Hexazinone	CN1C(=NC(=O)N(C1=O)C2CCCCC2)N(C)C	1	3	3	3	Good	4.14134	In	4	0.068903	0.828512
244	Bromoxynil-butanoate	CCCC(=O)OC1=C(C=C(C=C1Br)C#N)Br	1	3	3	3	Good	4.14005	In	4	0.0678782	0.830631
199	Benzyl benzoate	C1=CC=C(C=C1)COC(=O)C2=CC=CC=C2	1	3	3	3	Good	4.1381	In	4	0.0663308	0.83385
928	Guadipyr	CCCCC=NN(CC1=CN=C(C=C1)Cl)C(=N[N+](=O)[O-])N	1	3	3	3	Good	4.13728	In	4	0.0656774	0.835217
27	1-naphthylacetamide	C1=CC=C2C(=C1)C=CC=C2CC(=O)N	1	3	3	3	Good	4.13664	In	4	0.0651763	0.836269
546	Diclocymet	CC(C1=C(C=C(C=C1)Cl)Cl)NC(=O)C(C#N)C(C)(C)C	1	3	3	3	Good	4.13531	In	4	0.0641199	0.838494
286	Calvinphos	COP([O-])(=O)OC=C(Cl)Cl	1	3	3	3	Good	4.13278	In	4	0.0621119	0.842756
1388	Propyzamide	CC(C)(C#C)NC(=O)C1=CC(=CC(=C1)Cl)Cl	1	3	3	3	Good	4.13241	In	4	0.0618232	0.843373
1581	Thidiazuron	C1=CC=C(C=C1)NC(=O)NC2=CN=NS2	1	3	3	3	Good	4.13237	In	4	0.061786	0.843452
226	Boscalid	C1=CC=C(C(=C1)C2=CC=C(C=C2)Cl)NC(=O)C3=C(N=CC=C3)Cl	1	3	3	3	Good	4.13108	In	4	0.0607668	0.845636
1371	Propamocarb	CCCOC(=O)NCCCN(C)C	1	3	3	3	Good	4.12924	In	4	0.0593116	0.848774
1184	Metobromuron	CN(C(=O)NC1=CC=C(C=C1)Br)OC	1	3	3	3	Good	4.12653	In	4	0.0571575	0.853461
171	Benoxacor	CC1COC2=CC=CC=C2N1C(=O)C(Cl)Cl	1	3	3	3	Good	4.125	In	4	0.0559512	0.856109
861	Fluquinconazole	C1=CC2=C(C=C1F)C(=O)N(C(=N2)N3C=NC=N3)C4=C(C=C(C=C4)Cl)Cl	1	3	3	3	Good	4.12429	In	4	0.0553812	0.857365
1112	Mecoprop etexyl	CCCCC(CC)COC(=O)C(C)OC1=C(C=C(C=C1)Cl)C	1	3	3	3	Good	4.12393	In	4	0.0551002	0.857986
1115	Mecoprop-P etexyl	CCCCC(CC)COC(=O)C(C)OC1=C(C=C(C=C1)Cl)C	1	3	3	3	Good	4.12393	In	4	0.0551002	0.857986
1354	Procymidone	CC12CC1(C(=O)N(C2=O)C3=CC(=CC(=C3)Cl)Cl)C	1	3	3	3	Good	4.12269	In	4	0.05412	0.860159
751	Fenpropathrin	CC1(C(C1(C)C)C(=O)OC(C#N)C2=CC(=CC=C2)OC3=CC=CC=C3)C	1	3	3	3	Good	4.12235	In	4	0.0538459	0.860769
1424	Pyribambenz-propyl	CCCOC(=O)C1=CC=C(C=C1)NCC2=CC=CC=C2OC3=NC(=CC(=N3)OC)OC	1	3	3	3	Good	4.12232	In	4	0.0538207	0.860825
1437	Pyriftalid	CC1C2=C(C(=CC=C2)SC3=NC(=CC(=N3)OC)OC)C(=O)O1	1	3	3	3	Good	4.12213	In	4	0.053671	0.861158
482	Cyprofuram	C1CC1C(=O)N(C2CCOC2=O)C3=CC(=CC=C3)Cl	1	3	3	3	Good	4.12196	In	4	0.0535336	0.861465
1444	Pyriofenone	CC1=CC(=C(C(=C1C(=O)C2=C(C(=CN=C2OC)Cl)C)OC)OC)OC	1	3	3	3	Good	4.12175	In	4	0.0533701	0.861829
1096	MCPA-etexyl	CCCCC(CC)COC(=O)COC1=C(C=C(C=C1)Cl)C	1	3	3	3	Good	4.12158	In	4	0.053238	0.862124
1197	Metyltetraprole	CC1=C(C(=CC=C1)N2C(=O)N(N=N2)C)COC3=NN(C=C3)C4=CC=C(C=C4)Cl	1	3	3	3	Good	4.12138	In	4	0.0530771	0.862484
886	Forchlorfenuron	C1=CC=C(C=C1)NC(=O)NC2=CC(=NC=C2)Cl	1	3	3	3	Good	4.12119	In	4	0.0529282	0.862816
1099	MCPA-isoctyl	CC1=C(C=CC(=C1)Cl)OCC(=O)OCCCCCC(C)C	1	3	3	3	Good	4.11872	In	4	0.0509703	0.867217
965	Hyquincarb	CC1=NC2=C(CCCC2)C(=C1)OC(=O)N(C)C	1	3	3	3	Good	4.11645	In	4	0.0491691	0.871306
613	Dinotefuran	CN=C(NCC1CCOC1)N[N+](=O)[O-]	1	3	3	3	Good	4.11525	In	10	0.298153	0.590414
61	Acetamide	CC(=O)N	1	3	3	3	Good	4.11486	In	4	0.0479127	0.87418
1414	Pyrapropoyne	CC(C)ON=C(CNC(=O)C1=CN(N=C1C(F)F)C)C2=C(C=C(C=C2)C#CC3CC3)Cl	1	3	3	3	Good	4.11483	In	4	0.0478863	0.874241
1208	Monolinuron	CN(C(=O)NC1=CC=C(C=C1)Cl)OC	1	3	3	3	Good	4.11243	In	4	0.0459844	0.87863
1433	Pyridate	CCCCCCCCSC(=O)OC1=CC(=NN=C1C2=CC=CC=C2)Cl	1	3	3	3	Good	4.11242	In	4	0.0459783	0.878644
1434	Pyridinitril	CCCCCCCCSC(=O)OC1=CC(=NN=C1C2=CC=CC=C2)Cl	1	3	3	3	Good	4.11242	In	4	0.0459783	0.878644
845	Fluothiuron	CN(C)C(=O)NC1=CC(=C(C=C1)SC(F)(F)Cl)Cl	1	3	3	3	Good	4.11211	In	4	0.0457314	0.879217
1423	Pyribambenz-isopropyl	CC(C)OC(=O)C1=CC=C(C=C1)NCC2=CC=CC=C2OC3=NC(=CC(=N3)OC)OC	1	3	3	3	Good	4.11205	In	4	0.045683	0.879329
1093	MCPA-butyl	CCCCOC(=O)COC1=C(C=C(C=C1)Cl)C	1	3	3	3	Good	4.11148	In	4	0.0452312	0.88038
1027	Isofetamid	CC1=C(SC=C1)C(=O)NC(C)(C)C(=O)C2=C(C=C(C=C2)OC(C)C)C	1	3	3	3	Good	4.11107	In	4	0.0449036	0.881143
1268	Oxadiargyl	CC(C)(C)C1=NN(C(=O)O1)C2=CC(=C(C=C2Cl)Cl)OCC#C	1	3	3	3	Good	4.11094	In	4	0.0448056	0.881372
1333	Piperalin	CC1CCCCN1CCCOC(=O)C2=CC(=C(C=C2)Cl)Cl	1	3	3	3	Good	4.10794	In	4	0.0424228	0.886968
1236	Nicofluprole	CN(C1CC1)C(=O)C2=C(N=CC(=C2)C3=CN(N=C3)C4=C(C=C(C=C4Cl)C(C(F)(F)F)(C(F)(F)F)F)Cl)Cl	1	3	3	3	Good	4.10779	In	4	0.0423093	0.887236
1116	Mecoprop-P isobutyl	CC1=C(C=CC(=C1)Cl)OC(C)C(=O)OCC(C)C	1	3	3	3	Good	4.1069	In	4	0.0416	0.888916
756	Fenpyroximate	CC1=NN(C(=C1C=NOCC2=CC=C(C=C2)C(=O)OC(C)(C)C)OC3=CC=CC=C3)C	1	3	3	3	Good	4.10593	In	4	0.0408318	0.890743
1098	MCPA-isobutyl	CC1=C(C=CC(=C1)Cl)OCC(=O)OCC(C)C	1	3	3	3	Good	4.10455	In	4	0.0397378	0.893359
400	Cliodinate	CC(=O)OC1=C(C(=NC=C1I)Cl)I	1	3	3	3	Good	4.09987	In	4	0.0360315	0.902333
327	Chlorbromuron	CN(C(=O)NC1=CC(=C(C=C1)Br)Cl)OC	1	3	3	3	Good	4.09884	In	4	0.0352086	0.904351
416	Cloquintocet-mexyl	CCCCCC(C)OC(=O)COC1=C2C(=C(C=C1)Cl)C=CC=N2	1	3	3	3	Good	4.09749	In	4	0.0341436	0.906975
1097	MCPA-ethyl	CCOC(=O)COC1=C(C=C(C=C1)Cl)C	1	3	3	3	Good	4.09694	In	4	0.0337043	0.908062
409	Clofop-isobutyl	CC(C)COC(=O)C(C)OC1=CC=C(C=C1)OC2=CC=C(C=C2)Cl	1	3	3	3	Good	4.09616	In	4	0.0330864	0.909595
1100	MCPA-isopropyl	CC1=C(C=CC(=C1)Cl)OCC(=O)OC(C)C	1	3	3	3	Good	4.09576	In	4	0.0327732	0.910374
266	Buthiuron	CCCCS(=O)(=O)C1=NN=C(S1)N(C)C(=O)NC	1	3	3	3	Good	4.09544	In	4	0.0325148	0.911018
1046	Isoxaben	CCC(C)(CC)C1=NOC(=C1)NC(=O)C2=C(C=CC=C2OC)OC	1	3	3	3	Good	4.09452	In	4	0.0317863	0.912838
538	Dichlorprop-P-etexyl	CCCCC(CC)COC(=O)C(C)OC1=C(C=C(C=C1)Cl)Cl	1	3	3	3	Good	4.09417	In	4	0.0315126	0.913523
542	Dichlorprop-P-etexyl	CCCCC(CC)COC(=O)C(C)OC1=C(C=C(C=C1)Cl)Cl	1	3	3	3	Good	4.09417	In	4	0.0315126	0.913523
742	Fenoxanil	CC(C)C(C)(C#N)NC(=O)C(C)OC1=C(C=C(C=C1)Cl)Cl	1	3	3	3	Good	4.09314	In	4	0.0306938	0.91558
879	Fluxametamide	Cc1cc(ccc1C(=O)NC=NOC)C2=NOC(C2)(c3cc(cc(c3)Cl)Cl)C(F)(F)F	1	3	3	3	Good	4.09236	In	4	0.0300712	0.917151
679	Ethidimuron	CCS(=O)(=O)C1=NN=C(S1)N(C)C(=O)NC	1	3	3	3	Good	4.09212	In	4	0.0298855	0.91762
1142	Metamifop	CC(C(=O)N(C)C1=CC=CC=C1F)OC2=CC=C(C=C2)OC3=NC4=C(O3)C=C(C=C4)Cl	1	3	3	3	Good	4.09164	In	4	0.0295006	0.918595
302	Carbosulfan	CCCCN(CCCC)SN(C)C(=O)OC1=CC=CC2=C1OC(C2)(C)C	1	3	3	3	Good	4.09123	In	4	0.0291804	0.919407
649	Eglinazine-ethyl	CCNC1=NC(=NC(=N1)NCC(=O)OCC)Cl	1	3	3	3	Good	4.09092	In	4	0.0289317	0.920039
535	Dichlorprop-isoctyl	CCCCCCC(C)OC(=O)C(C)OC1=C(C=C(C=C1)Cl)Cl	1	3	3	3	Good	4.09091	In	4	0.0289216	0.920065
539	Dichlorprop-isoctyl	CCCCCCC(C)OC(=O)C(C)OC1=C(C=C(C=C1)Cl)Cl	1	3	3	3	Good	4.09091	In	4	0.0289216	0.920065
1362	Proglinazine-ethyl	CCOC(=O)CNC1=NC(=NC(=N1)Cl)NC(C)C	1	3	3	3	Good	4.09015	In	4	0.0283239	0.921587
1618	Tralomethrin	CC1(C(C1C(=O)OC(C#N)C2=CC(=CC=C2)OC3=CC=CC=C3)C(C(Br)(Br)Br)Br)C	1	3	3	3	Good	4.09002	In	4	0.0282224	0.921847
104	Amidochlor	CCC1=C(C(=CC=C1)CC)N(CNC(=O)C)C(=O)CCl	1	3	3	3	Good	4.08687	In	4	0.025722	0.928274
1284	Parafluron	CN(C)C(=O)NC1=CC=C(C=C1)C(F)(F)F	1	3	3	3	Good	4.08656	In	4	0.0254767	0.928909
1029	Isolan	CC1=NN(C(=C1)OC(=O)N(C)C)C(C)C	1	3	3	3	Good	4.08517	In	4	0.0243748	0.931774
1075	Linuron	CN(C(=O)NC1=CC(=C(C=C1)Cl)Cl)OC	1	3	3	3	Good	4.08474	In	4	0.0240355	0.93266
278	Cafenstrole	CCN(CC)C(=O)N1C=NC(=N1)S(=O)(=O)C2=C(C=C(C=C2C)C)C	1	3	3	3	Good	4.08258	In	4	0.0223264	0.937147
813	Fluenetil	C1=CC=C(C=C1)C2=CC=C(C=C2)CC(=O)OCCF	1	3	3	3	Good	4.08203	In	4	0.0218836	0.938317
1113	Mecoprop methyl	CC1=C(C=CC(=C1)Cl)OC(C)C(=O)OC	1	3	3	3	Good	4.08167	In	4	0.0216001	0.939067
1466	Quizalofop-ethyl	CCOC(=O)C(C)OC1=CC=C(C=C1)OC2=CN=C3C=C(C=CC3=N2)Cl	1	3	3	3	Good	4.07933	In	4	0.0197447	0.944009
1101	MCPA-methyl	CC1=C(C=CC(=C1)Cl)OCC(=O)OC	1	3	3	3	Good	4.07932	In	4	0.019738	0.944026
978	Imazaquin methyl	CC(C)C1(C(=O)NC(=N1)C2=NC3=CC=CC=C3C=C2C(=O)OC)C	1	3	3	3	Good	4.07915	In	4	0.0196	0.944396
1047	Isoxachlortole	CS(=O)(=O)C1=C(C=CC(=C1)Cl)C(=O)C2=C(ON=C2)C3CC3	1	3	3	3	Good	4.07739	In	4	0.0182079	0.948141
743	Fenoxaprop-ethyl	CCOC(=O)C(C)OC1=CC=C(C=C1)OC2=NC3=C(O2)C=C(C=C3)Cl	1	3	3	3	Good	4.07632	In	4	0.0173592	0.950438
745	Fenoxaprop-P-ethyl	CCOC(=O)C(C)OC1=CC=C(C=C1)OC2=NC3=C(O2)C=C(C=C3)Cl	1	3	3	3	Good	4.07632	In	4	0.0173592	0.950438
866	Flurochloridone	C1C(C(C(=O)N1C2=CC=CC(=C2)C(F)(F)F)Cl)CCl	1	3	3	3	Good	4.0757	In	4	0.0168669	0.951776
1620	Trans-flurochloridone	C1C(C(C(=O)N1C2=CC=CC(=C2)C(F)(F)F)Cl)CCl	1	3	3	3	Good	4.0757	In	4	0.0168669	0.951776
1607	Tirpate	CC1CSC(C)(/C(/[H])=N/OC(=NC)O)S1	1	3	3	3	Good	4.07535	In	4	0.0165892	0.952532
341	Chlorfenprop-methyl	COC(=O)C(CC1=CC=C(C=C1)Cl)Cl	1	3	3	3	Good	4.07334	In	4	0.0149956	0.956895
1124	Mefluidide	CC1=CC(=C(C=C1NC(=O)C)NS(=O)(=O)C(F)(F)F)C	1	3	3	3	Good	4.07332	In	4	0.0149826	0.956931
1378	Propham	CC(C)OC(=O)NC1=CC=CC=C1	1	3	3	3	Good	4.07314	In	4	0.0148404	0.957322
467	Cyhalofop-butyl	CCCCOC(=O)C(C)OC1=CC=C(C=C1)OC2=C(C=C(C=C2)C#N)F	1	3	3	3	Good	4.07184	In	4	0.0138088	0.960171
583	Dimetachlone	C1CC(=O)N(C1=O)C2=CC(=CC(=C2)Cl)Cl	1	3	3	3	Good	4.07101	In	4	0.0131521	0.961993
1038	Isoprothiolane	CC(C)OC(=O)C(=C1SCCS1)C(=O)OC(C)C	1	3	3	3	Good	4.07084	In	4	0.0130155	0.962373
738	Fenoprop-isoctyl	CC(C)CCCCCOC(=O)C(C)OC1=CC(=C(C=C1Cl)Cl)Cl	1	3	3	3	Good	4.0707	In	4	0.0129033	0.962685
838	Fluoridamid	CC1=C(C=C(C=C1)NC(=O)C)NS(=O)(=O)C(F)(F)F	1	3	3	3	Good	4.06951	In	4	0.0119658	0.965302
830	Flumioxazin	C#CCN1C(=O)COC2=CC(=C(C=C21)N3C(=O)C4=C(C3=O)CCCC4)F	1	3	3	3	Good	4.06885	In	4	0.011439	0.966779
1541	Tebufloquin	CC1=C(C2=CC(=CC(=C2N=C1C)F)C(C)(C)C)OC(=O)C	1	3	3	3	Good	4.06862	In	4	0.0112538	0.967299
733	Fenobucarb	CCC(C)C1=CC=CC=C1OC(=O)NC	1	3	3	3	Good	4.06823	In	4	0.0109496	0.968155
726	Fenethacarb	CCC1=CC(=CC(=C1)OC(=O)NC)CC	1	3	3	3	Good	4.06802	In	4	0.0107832	0.968624
1555	Terbucarb	CC1=CC(=C(C(=C1)C(C)(C)C)OC(=O)NC)C(C)(C)C	1	3	3	3	Good	4.06781	In	4	0.0106144	0.9691
959	Hexythiazox	CC1C(SC(=O)N1C(=O)NC2CCCCC2)C3=CC=C(C=C3)Cl	1	3	3	3	Good	4.06747	In	4	0.0103425	0.969868
680	Ethiofencarb	CCSCC1=CC=CC=C1OC(=O)NC	1	3	3	3	Good	4.06738	In	4	0.0102775	0.970051
763	Fenthiaprop ethyl	COC(=O)C(C)OC1=CC=C(C=C1)OC2=NC3=C(S2)C=C(C=C3)Cl	1	3	3	3	Good	4.06716	In	4	0.0100967	0.970563
1410	Pyramat	CCCC1=CC(=NC(=N1)C)OC(=O)N(C)C	1	3	3	3	Good	4.06579	In	4	0.00901124	0.973644
253	Bufencarb	CCCC(C)C1=CC(OC(=O)NC)=CC=C1	1	3	3	3	Good	4.06567	In	4	0.00891669	0.973913
1035	Isoprocarb	CC(C)C1=CC=CC=C1OC(=O)NC	1	3	3	3	Good	4.06464	In	4	0.00809934	0.976248
747	Fenoxycarb	CCOC(=O)NCCOC1=CC=C(C=C1)OC2=CC=CC=C2	1	3	3	3	Good	4.06445	In	4	0.00795373	0.976665
737	Fenoprop-butyl	CCCCOC(=O)C(C)OC1=CC(=C(C=C1Cl)Cl)Cl	1	3	3	3	Good	4.06346	In	4	0.0071642	0.978932
1366	Promecarb	CC1=CC(=CC(=C1)OC(=O)NC)C(C)C	1	3	3	3	Good	4.06332	In	4	0.0070588	0.979236
548	Diclofop-methyl	CC(C(=O)OC)OC1=CC=C(C=C1)OC2=C(C=C(C=C2)Cl)Cl	1	3	3	3	Good	4.06237	In	4	0.00630145	0.981422
1669	Trimethacarb	CC1=CC(=CC(=C1C)C)OC(=O)NC	1	3	3	3	Good	4.06208	In	4	0.00607071	0.98209
453	Cycloheximide	CC1CC(C(=O)C(C1)C(CC2CC(=O)NC(=O)C2)O)C	1	3	3	3	Good	4.06201	In	4	0.00601411	0.982254
1043	Isotianil	C1=CC=C(C(=C1)C#N)NC(=O)C2=C(C(=NS2)Cl)Cl	1	3	3	3	Good	4.06182	In	4	0.00586473	0.982688
1105	M-cumenyl methylcarbamate	CC(C)C1=CC(=CC=C1)OC(=O)NC	1	3	3	3	Good	4.06126	In	4	0.00542008	0.983979
1158	Methiocarb	CC1=CC(=CC(=C1SC)C)OC(=O)NC	1	3	3	3	Good	4.06116	In	4	0.00534389	0.984201
1687	XMC	CC1=CC(=CC(=C1)OC(=O)NC)C	1	3	3	3	Good	4.06083	In	4	0.00508261	0.984962
1690	Xylylcarb	CC1=C(C=C(C=C1)OC(=O)NC)C	1	3	3	3	Good	4.06001	In	4	0.00443199	0.986861
1615	Topramezone	CC1=C(C=CC(=C1C2=NOCC2)S(=O)(=O)C)C(=O)C3=CNN(C3=O)C	1	3	3	3	Good	4.05973	In	4	0.0042106	0.987509
1187	Metolcarb	CC1=CC(=CC=C1)OC(=O)NC	1	3	3	3	Good	4.05876	In	4	0.00344389	0.989761
794	Fluazifop-butyl	CCCCOC(=O)C(C)OC1=CC=C(C=C1)OC2=NC=C(C=C2)C(F)(F)F	1	3	3	3	Good	4.05742	In	4	0.00237535	0.992915
796	Fluazifop-P-butyl	CCCCOC(=O)C(C)OC1=CC=C(C=C1)OC2=NC=C(C=C2)C(F)(F)F	1	3	3	3	Good	4.05742	In	4	0.00237535	0.992915
1199	Mexacarbate	CC1=CC(=CC(=C1N(C)C)C)OC(=O)NC	1	3	3	3	Good	4.05679	In	4	0.0018808	0.994382
1340	Pirimicarb	CC1=C(N=C(N=C1OC(=O)N(C)C)N(C)C)C	1	3	3	3	Good	4.05656	In	4	0.00169572	0.994932
1063	Kresoxim-methyl	CC1=CC=CC=C1OCC2=CC=CC=C2C(=NOC)C(=O)OC	1	3	3	3	Good	4.05574	In	4	0.0010511	0.996852
666	Esfenvalerate	CC(C)C(C1=CC=C(C=C1)Cl)C(=O)OC(C#N)C2=CC(=CC=C2)OC3=CC=CC=C3	1	3	3	3	Good	4.05531	In	4	0.000708	0.997879
773	Fenvalerate	CC(C)C(C1=CC=C(C=C1)Cl)C(=O)OC(C#N)C2=CC(=CC=C2)OC3=CC=CC=C3	1	3	3	3	Good	4.05531	In	4	0.000708	0.997879
108	Aminocarb	CC1=C(C=CC(=C1)OC(=O)NC)N(C)C	1	3	3	3	Good	4.05472	In	4	0.000242	0.999273
293	Carbaryl	CNC(=O)OC1=CC=CC2=CC=CC=C21	1	3	3	3	Good	4.05442	In	4	0	1
156	Beflubutamid	CCC(C(=O)NCC1=CC=CC=C1)OC2=CC(=C(C=C2)F)C(F)(F)F	1	3	3	3	Good	4.05342	In	4	0.000788	0.997632
536	Dichlorprop-methyl	CC(C(=O)OC)OC1=C(C=C(C=C1)Cl)Cl	1	3	3	3	Good	4.05191	In	4	0.00198746	0.99403
540	Dichlorprop-methyl	CC(C(=O)OC)OC1=C(C=C(C=C1)Cl)Cl	1	3	3	3	Good	4.05191	In	4	0.00198746	0.99403
1617	Tralocythrin	CC1(C(C1C(=O)OC(C#N)C2=CC(=CC=C2)OC3=CC=CC=C3)C(C(Cl)(Cl)Br)Br)C	1	3	3	3	Good	4.05165	In	4	0.00219325	0.993412
526	Dichlobentiazox	C1=CC=C2C(=C1)C(=NS2(=O)=O)OCC3=C(C(=NS3)Cl)Cl	1	3	3	3	Good	4.05149	In	10	0.289604	0.626739
1294	Penflufen	CC1=NN(C(=C1C(=O)NC2=CC=CC=C2C(C)CC(C)C)F)C	1	3	3	3	Good	4.05016	In	4	0.00337283	0.989868
1245	N-methyl saccharine	CN1C(=O)C2=CC=CC=C2S1(=O)=O	1	3	3	3	Good	4.04937	In	4	0.00400483	0.98797
1656	Trifloxystrobin	CC(=NOCC1=CC=CC=C1C(=NOC)C(=O)OC)C2=CC(=CC=C2)C(F)(F)F	1	3	3	3	Good	4.04582	In	4	0.00681355	0.979532
376	Chlorpropham	CC(C)OC(=O)NC1=CC(=CC=C1)Cl	1	3	3	3	Good	4.04545	In	4	0.00710846	0.978646
833	Fluometuron	CN(C)C(=O)NC1=CC=CC(=C1)C(F)(F)F	1	3	3	3	Good	4.04407	In	4	0.00820423	0.975355
1450	Pyroxasulfone	CC1(CC(=NO1)S(=O)(=O)CC2=C(N(N=C2C(F)(F)F)C)OC(F)F)C	1	3	3	3	Good	4.0432	In	4	0.00889324	0.973285
891	Formparanate	CC1=C(C=CC(=C1)OC(=O)NC)N=CN(C)C	1	3	3	3	Good	4.04154	In	4	0.0102086	0.969334
178	Bentazone	CC(C)N1C(=O)C2=CC=CC=C2NS1(=O)=O	1	3	3	3	Good	4.03938	In	4	0.0119191	0.964195
42	2,5-dichlorobenzoic acid methyl ester	COC(=O)C1=C(C=CC(=C1)Cl)Cl	1	3	3	3	Good	4.03851	In	4	0.0126081	0.962126
297	Carbofuran	CC1(CC2=C(O1)C(=CC=C2)OC(=O)NC)C	1	3	3	3	Good	4.03814	In	4	0.0129038	0.961237
563	Diethofencarb	CCOC1=C(C=C(C=C1)NC(=O)OC(C)C)OCC	1	3	3	3	Good	4.03809	In	4	0.0129402	0.961128
1128	Mephenate	CNC(=O)Oc1ccc(Cl)cc1	1	3	3	3	Good	4.03608	In	4	0.0145364	0.956333
43	2,6-dichloro-N-((4-(trifluoromethyl)phenyl)methyl-benzamide	C1=CC(=C(C(=C1)Cl)C(=O)NCC2=CC=C(C=C2)C(F)(F)F)Cl	1	3	3	3	Good	4.03522	In	4	0.0152159	0.954292
114	Aminopyrofen	CC1=NC(=C(C=C1)C(=O)OCC2=CC=C(C=C2)OC3=CC=CC=C3)N	1	3	3	3	Good	4.03481	In	4	0.0155458	0.953301
888	Formetanate	CNC(=O)OC1=CC=CC(=C1)N=CN(C)C	1	3	3	3	Good	4.0344	In	4	0.0158709	0.952324
889	Formetanate hydrochloride	CNC(=O)OC1=CC=CC(=C1)N=CN(C)C.Cl	1	3	3	3	Good	4.0344	In	4	0.0158709	0.952324
739	Fenoprop-methyl	CC(C(=O)OC)OC1=CC(=C(C=C1Cl)Cl)Cl	1	3	3	3	Good	4.0313	In	4	0.018329	0.94494
1426	Pyribenzoxim	COC1=CC(=NC(=N1)OC2=C(C(=CC=C2)OC3=NC(=CC(=N3)OC)OC)C(=O)ON=C(C4=CC=CC=C4)C5=CC=CC=C5)OC	1	3	3	3	Good	4.03115	In	4	0.018443	0.944598
270	Butoxycarboxim	CC(C(=NOC(=O)NC)C)S(=O)(=O)C	1	3	3	3	Good	4.03083	In	4	0.018697	0.943835
815	Flufenacet	CC(C)N(C1=CC=C(C=C1)F)C(=O)COC2=NN=C(S2)C(F)(F)F	1	3	3	3	Good	4.03046	In	4	0.0189891	0.942957
1383	Propoxur	CC(C)OC1=CC=CC=C1OC(=O)NC	1	3	3	3	Good	4.02785	In	4	0.0210601	0.936736
66	Acetoprole	CC(=O)C1=NN(C(=C1S(=O)C)N)C2=C(C=C(C=C2Cl)C(F)(F)F)Cl	1	3	3	3	Good	4.0255	In	4	0.0229221	0.931143
1539	Tebufenozide	CCC1=CC=C(C=C1)C(=O)NN(C(=O)C2=CC(=CC(=C2)C)C)C(C)(C)C	1	3	3	3	Good	4.02471	In	4	0.023546	0.929268
1418	Pyrazolynate	CC1=CC=C(C=C1)S(=O)(=O)OC2=C(C(=NN2C)C)C(=O)C3=C(C=C(C=C3)Cl)Cl	1	3	3	3	Good	4.02389	In	4	0.024201	0.927301
390	Chromafenozide	CC1=CC(=CC(=C1)C(=O)N(C(C)(C)C)NC(=O)C2=C(C3=C(C=C2)OCCC3)C)C	1	3	3	3	Good	4.0233	In	4	0.0246676	0.925899
12	1,1-bis(4-chlorophenyl)-2-ethoxyethanol	CCOCC(C1=CC=C(C=C1)Cl)(C2=CC=C(C=C2)Cl)O	1	3	3	3	Good	4.02274	In	10	0.288675	0.644621
47	2-butoxyethanol	CCCCOCCO	1	3	3	3	Good	4.02274	In	10	0.288675	0.644621
49	2-methoxyethanol	COCCO	1	3	3	3	Good	4.02274	In	10	0.288675	0.644621
51	2-methoxyethylmercury chloride	COC[CH2]	1	3	3	3	Good	4.02274	In	10	0.288675	0.644621
82	Aldimorph	CCCCCCCCCCCCN1CC(OC(C1)C)C	1	3	3	3	Good	4.02274	In	10	0.288675	0.644621
184	Benzalkonium chloride	CC(C)(C)CC(C)(C)C1=CC=C(C=C1)OCCOCC[N+](C)(C)CC2=CC=CC=C2	1	3	3	3	Good	4.02274	In	10	0.288675	0.644621
214	Bis(2-chloroethyl)ether	C(CCl)OCCCl	1	3	3	3	Good	4.02274	In	10	0.288675	0.644621
248	Bromuconazole	C1C(COC1(CN2C=NC=N2)C3=C(C=C(C=C3)Cl)Cl)Br	1	3	3	3	Good	4.02274	In	10	0.288675	0.644621
337	Chlorfenapyr	CCOCN1C(=C(C(=C1C(F)(F)F)Br)C#N)C2=CC=C(C=C2)Cl	1	3	3	3	Good	4.02274	In	10	0.288675	0.644621
492	DCIP	CC(CCl)OC(C)CCl	1	3	3	3	Good	4.02274	In	10	0.288675	0.644621
642	Dodemorph	CC1CN(CC(O1)C)C2CCCCCCCCCCC2	1	3	3	3	Good	4.02274	In	10	0.288675	0.644621
646	Ecolyst	CC[NH+](CC)CCOCC1=CC=C(C=C1)C.	1	3	3	3	Good	4.02274	In	10	0.288675	0.644621
657	Epichlorohydrin	C1C(O1)CCl	1	3	3	3	Good	4.02274	In	10	0.288675	0.644621
660	Epofenonane	CCC1=CC=C(C=C1)OCCC(CC)CCC2C(O2)(C)CC	1	3	3	3	Good	4.02274	In	10	0.288675	0.644621
661	Epoxiconazole	C1=CC=C(C(=C1)C2C(O2)(CN3C=NC=N3)C4=CC=C(C=C4)F)Cl	1	3	3	3	Good	4.02274	In	10	0.288675	0.644621
687	Ethofumesate	CCOC1C(C2=C(O1)C=CC(=C2)OS(=O)(=O)C)(C)C	1	3	3	3	Good	4.02274	In	10	0.288675	0.644621
692	Ethoxylated p-nonylphenol	c1(ccc(OCCOCCO)cc1)CCCCCCCCC	1	3	3	3	Good	4.02274	In	10	0.288675	0.644621
705	Etinofen	CCOCC1=CC(=CC(=C1O)[N+](=O)[O-])[N+](=O)[O-]	1	3	3	3	Good	4.02274	In	10	0.288675	0.644621
706	Etofenprox	CCOC1=CC=C(C=C1)C(C)(C)COCC2=CC(=CC=C2)OC3=CC=CC=C3	1	3	3	3	Good	4.02274	In	10	0.288675	0.644621
753	Fenpropimorph	CC1CN(CC(O1)C)CC(C)CC2=CC=C(C=C2)C(C)(C)C	1	3	3	3	Good	4.02274	In	10	0.288675	0.644621
820	Flufenprox	CCOC1=CC=C(C=C1)C(COCC2=CC(=CC=C2)OC3=CC=C(C=C3)Cl)C(F)(F)F	1	3	3	3	Good	4.02274	In	10	0.288675	0.644621
912	Furyloxyfen	C1COCC1OC2=C(C=CC(=C2)OC3=C(C=C(C=C3)C(F)(F)F)Cl)[N+](=O)[O-]	1	3	3	3	Good	4.02274	In	10	0.288675	0.644621
934	Halfenprox	CC(C)(COCC1=CC(=CC=C1)OC2=CC=CC=C2)C3=CC=C(C=C3)OC(F)(F)Br	1	3	3	3	Good	4.02274	In	10	0.288675	0.644621
1053	Izopamfos	CCCCCCCCCOCCC[NH3+]	1	3	3	3	Good	4.02274	In	10	0.288675	0.644621
1166	Methoprotryne	CC(C)NC1=NC(=NC(=N1)NCCCOC)SC	1	3	3	3	Good	4.02274	In	10	0.288675	0.644621
1258	Octachlorodipropyl ether	CCC(OC(C(C(Cl)(Cl)Cl)(Cl)Cl)(Cl)Cl)Cl	1	3	3	3	Good	4.02274	In	10	0.288675	0.644621
1439	Pyrimidifen	CCC1=C(C(=NC=N1)NCCOC2=C(C(=C(C=C2)CCOCC)C)C)Cl	1	3	3	3	Good	4.02274	In	10	0.288675	0.644621
1442	Pyrimisulfan	COCC1=C(C(=CC=C1)C(C2=NC(=CC(=N2)OC)OC)O)NS(=O)(=O)C(F)F	1	3	3	3	Good	4.02274	In	10	0.288675	0.644621
1564	Tetraconazole	C1=CC(=C(C=C1Cl)Cl)C(CN2C=NC=N2)COC(C(F)F)(F)F	1	3	3	3	Good	4.02274	In	10	0.288675	0.644621
1602	Tiaojiean	C[N+]1(CCOCC1)C	1	3	3	3	Good	4.02274	In	10	0.288675	0.644621
1651	Tridemorph	CCCCCCCCCCCCCN1CC(OC(C1)C)C	1	3	3	3	Good	4.02274	In	10	0.288675	0.644621
1652	Tridiphane	C1C(O1)(CC(Cl)(Cl)Cl)C2=CC(=CC(=C2)Cl)Cl	1	3	3	3	Good	4.02274	In	10	0.288675	0.644621
1654	Trifenmorph	C1COCCN1C(C2=CC=CC=C2)(C3=CC=CC=C3)C4=CC=CC=C4	1	3	3	3	Good	4.02274	In	10	0.288675	0.644621
1682	Verbutin	CC#CCOC(C)C1=CC(=C(C=C1)OC)OC	1	3	3	3	Good	4.02274	In	10	0.288675	0.644621
292	Carbanolate	CC1=CC(=C(C=C1C)Cl)OC(=O)NC	1	3	3	3	Good	4.02097	In	4	0.0265174	0.920342
707	Etoxazole	CCOC1=C(C=CC(=C1)C(C)(C)C)C2COC(=N2)C3=C(C=CC=C3F)F	1	3	3	3	Good	4.01942	In	10	0.288687	0.641332
1040	Isopyrazam	CC(C)C1C2CCC1C3=C2C=CC=C3NC(=O)C4=CN(N=C4C(F)F)C	1	3	3	3	Good	4.01886	In	4	0.0281869	0.915327
1324	Phthalide	C1C2=C(C(=C(C(=C2Cl)Cl)Cl)Cl)C(=O)O1	1	3	3	3	Good	4.01876	In	4	0.0282628	0.915099
942	Haloxyfop-P-methyl	CC(C(=O)OC)OC1=CC=C(C=C1)OC2=C(C=C(C=N2)C(F)(F)F)Cl	1	3	3	3	Good	4.01669	In	4	0.029903	0.910172
191	Benzofenap	CC1=CC=C(C=C1)C(=O)COC2=C(C(=NN2C)C)C(=O)C3=C(C(=C(C=C3)Cl)C)Cl	1	3	3	3	Good	4.01656	In	4	0.0300108	0.909848
1479	Sedaxane	CN1C=C(C(=N1)C(F)F)C(=O)NC2=CC=CC=C2C3CC3C4CC4	1	3	3	3	Good	4.0136	In	4	0.0323577	0.902798
323	Chlorazifop propargyl	CC(C(=O)OCC#C)OC1=CC=C(C=C1)OC2=C(C=C(C=N2)Cl)Cl	1	3	3	3	Good	4.01169	In	4	0.0338658	0.898268
295	Carbendazim	COC(=O)NC1=NC2=CC=CC=C2N1	1	3	3	3	Good	4.01105	In	4	0.0343747	0.896739
205	Bifenazate	CC(C)OC(=O)NNC1=C(C=CC(=C1)C2=CC=CC=C2)OC	1	3	3	3	Good	4.01017	In	4	0.0350782	0.894626
1422	Pyrazoxyfen	CC1=NN(C(=C1C(=O)C2=C(C=C(C=C2)Cl)Cl)OCC(=O)C3=CC=CC=C3)C	1	3	3	3	Good	4.00999	In	4	0.0352134	0.89422
165	Bendiocarb	CC1(OC2=C(O1)C(=CC=C2)OC(=O)NC)C	1	3	3	3	Good	4.00995	In	4	0.0352499	0.89411
1534	Swep	COC(=O)NC1=CC(=C(C=C1)Cl)Cl	1	3	3	3	Good	4.00839	In	4	0.0364853	0.890399
824	Fluindapyr	CC1CC(C)(C)c2c(ccc(c12)N=C(c3cn(C)nc3C(F)F)O)F	1	3	3	3	Good	4.00638	In	4	0.0380774	0.885616
919	Glyceryl distearate	CCCCCCCCCCCCCCCCCC(=O)OCC(COC(=O)CCCCCCCCCCCCCCCCC)O	1	3	3	3	Good	4.0048	In	4	0.0393301	0.881853
186	Benzamacril isobutyl	CC(C)COC(=O)C(=CN(C)CC1=CC=CC=C1)C#N	1	3	3	3	Good	4.00454	In	4	0.0395379	0.881229
997	Inpyrfluxam	CC1CC(C2=C1C(=CC=C2)NC(=O)C3=CN(N=C3C(F)F)C)(C)C	1	3	3	3	Good	4.00384	In	4	0.0400916	0.879566
81	Aldicarb	CC(C)(C=NOC(=O)NC)SC	1	3	3	3	Good	4.00358	In	4	0.0402976	0.878947
899	Fufenozide	CC1CC2=C(O1)C(=C(C=C2)C(=O)NN(C(=O)C3=CC(=CC(=C3)C)C)C(C)(C)C)C	1	3	3	3	Good	4.00324	In	4	0.0405638	0.878147
1577	Thiazafluron	CNC(=O)N(C)C1=NN=C(S1)C(F)(F)F	1	3	3	3	Good	4.00204	In	4	0.0415186	0.875279
303	Carboxazole	CC(C)(C)C1=CC(=NO1)NC(=O)OC	1	3	3	3	Good	4.00152	In	4	0.041934	0.874031
157	Benalaxyl	CC1=C(C(=CC=C1)C)N(C(C)C(=O)OC)C(=O)CC2=CC=CC=C2	1	3	3	3	Good	4.00002	In	4	0.0431237	0.870457
158	Benalaxyl-M	CC1=C(C(=CC=C1)C)N(C(C)C(=O)OC)C(=O)CC2=CC=CC=C2	1	3	3	3	Good	4.00002	In	4	0.0431237	0.870457
581	Dimefuron	CC(C)(C)C1=NN(C(=O)O1)C2=C(C=C(C=C2)NC(=O)N(C)C)Cl	1	3	3	3	Good	3.99876	In	4	0.0441183	0.86747
1343	Plifenate	CC(=O)OC(C1=CC(=C(C=C1)Cl)Cl)C(Cl)(Cl)Cl	1	3	3	3	Good	3.99853	In	4	0.0443033	0.866914
817	Flufenoxadiazam	C1=CC=C(C(=C1)NC(=O)C2=CC=C(C=C2)C3=NOC(=N3)C(F)(F)F)F	1	3	3	3	Good	3.9954	In	4	0.0467819	0.859468
402	Clodinafop propargyl	CC(C(=O)OCC#C)OC1=CC=C(C=C1)OC2=NC=C(C=C2F)Cl	1	3	3	3	Good	3.99539	In	4	0.0467933	0.859434
1329	Picolinafen	C1=CC(=CC(=C1)OC2=CC=CC(=N2)C(=O)NC3=CC=C(C=C3)F)C(F)(F)F	1	3	3	3	Good	3.99322	In	4	0.0485108	0.854275
524	Dicamba methyl	COC1=C(C=CC(=C1C(=O)OC)Cl)Cl	1	3	3	3	Good	3.9924	In	4	0.0491627	0.852316
154	Barban	C1=CC(=CC(=C1)Cl)NC(=O)OCC#CCCl	1	3	3	3	Good	3.99089	In	4	0.0503585	0.848724
868	Fluroxypyr-meptyl	CCCCCCC(C)OC(=O)COC1=NC(=C(C(=C1Cl)N)Cl)F	1	3	3	3	Good	3.9879	In	4	0.052724	0.841618
834	Fluopicolide	C1=CC(=C(C(=C1)Cl)C(=O)NCC2=C(C=C(C=N2)C(F)(F)F)Cl)Cl	1	3	3	3	Good	3.98723	In	4	0.0532541	0.840026
110	Aminocyclopyrachlor-methyl	COC(=O)C1=C(C(=NC(=N1)C2CC2)N)Cl	1	3	3	3	Good	3.98612	In	4	0.0541347	0.837381
870	Flurtamone	CNC1=C(C(=O)C(O1)C2=CC=CC=C2)C3=CC(=CC=C3)C(F)(F)F	1	3	3	3	Good	3.98539	In	10	0.290241	0.607554
394	Ciobutide	CCC(C#N)(C1=CC=CC=C1)C(=O)N	1	3	3	3	Good	3.98504	In	4	0.0549913	0.834807
811	Flucythrinate	CC(C)C(C1=CC=C(C=C1)OC(F)F)C(=O)OC(C#N)C2=CC(=CC=C2)OC3=CC=CC=C3	1	3	3	3	Good	3.98493	In	4	0.0550812	0.834538
864	Flurenol-butyl	CCCCOC(=O)C1(C2=CC=CC=C2C3=CC=CC=C31)O	1	3	3	3	Good	3.98488	In	4	0.0551217	0.834416
229	Brofluthrinate	CC(C)C(C1=CC=C(C=C1)OC(F)F)C(=O)OC(C#N)C2=CC(=CC=C2)OC3=CC=C(C=C3)Br	1	3	3	3	Good	3.98251	In	4	0.0569991	0.828776
328	Chlorbufam	CC(C#C)OC(=O)NC1=CC(=CC=C1)Cl	1	3	3	3	Good	3.98223	In	4	0.0572197	0.828113
1168	Methoxyfenozide	CC1=CC(=CC(=C1)C(=O)N(C(C)(C)C)NC(=O)C2=C(C(=CC=C2)OC)C)C	1	3	3	3	Good	3.98201	In	4	0.0573938	0.82759
586	Dimethenamid	CC1=CSC(=C1N(C(C)COC)C(=O)CCl)C	1	3	3	3	Good	3.98084	In	10	0.290645	0.603036
587	Dimethenamid-P	CC1=CSC(=C1N(C(C)COC)C(=O)CCl)C	1	3	3	3	Good	3.98084	In	10	0.290645	0.603036
1242	Nitrilacarb	CC(C)(CCC#N)C=NOC(=O)NC	1	3	3	3	Good	3.9797	In	4	0.0592247	0.82209
1186	Metolachlor	CCC1=CC=CC(=C1N(C(C)COC)C(=O)CCl)C	1	3	3	3	Good	3.9782	In	10	0.290899	0.600425
1495	S-metolachlor	CCC1=CC=CC(=C1N(C(C)COC)C(=O)CCl)C	1	3	3	3	Good	3.9782	In	10	0.290899	0.600425
1020	Isocarbamid	CC(C)CNC(=O)N1CCNC1=O	1	3	3	3	Good	3.97624	In	4	0.0619722	0.813837
584	Dimethachlor	CC1=C(C(=CC=C1)C)N(CCOC)C(=O)CCl	1	3	3	3	Good	3.97393	In	10	0.291344	0.596182
1411	Pyrametostrobin	CC1=C(N(N=C1C2=CC=CC=C2)C)OCC3=CC=CC=C3N(C(=O)OC)OC	1	3	3	3	Good	3.97298	In	4	0.0645526	0.806086
1278	Oxpoconazole	CC1(COC(N1C(=O)N2C=CN=C2)(C)CCCC3=CC=C(C=C3)Cl)C	1	3	3	3	Good	3.97058	In	10	0.291721	0.59286
1279	Oxpoconazole fumarate	CC1(C)COC(C)(CCCC2=CC=C(Cl)C=C2)N1C(=O)N1C=CN=C1	1	3	3	3	Good	3.97058	In	10	0.291721	0.59286
257	Butachlor	CCCCOCN(C1=C(C=CC=C1CC)CC)C(=O)CCl	1	3	3	3	Good	3.96812	In	10	0.292013	0.590422
935	Halofenozide	CC(C)(C)N(C(=O)C1=CC=CC=C1)NC(=O)C2=CC=C(C=C2)Cl	1	3	3	3	Good	3.96746	In	4	0.0689255	0.792949
1407	Pyraclostrobin	COC(=O)N(C1=CC=CC=C1COC2=NN(C=C2)C3=CC=C(C=C3)Cl)OC	1	3	3	3	Good	3.96543	In	4	0.0705344	0.788116
1235	Niclosamide	C1=CC(=C(C=C1[N+](=O)[O-])Cl)NC(=O)C2=C(C=CC(=C2)Cl)O	1	3	3	3	Good	3.96252	In	4	0.0728485	0.781165
1260	Ofurace	CC1=C(C(=CC=C1)C)N(C2CCOC2=O)C(=O)CCl	1	3	3	3	Good	3.96171	In	4	0.0734878	0.779244
268	Butonate	CCCC(=O)OC(C(Cl)(Cl)Cl)P(=O)(OC)OC	1	3	3	3	Good	3.95894	In	4	0.0756801	0.772659
1408	Pyraflufen-ethyl	CCOC(=O)COC1=C(C=C(C(=C1)C2=NN(C(=C2Cl)OC(F)F)C)F)Cl	1	3	3	3	Good	3.95884	In	4	0.0757621	0.772412
1556	Terbuchlor	CCCCOCN(C1=C(C=CC=C1C(C)(C)C)C)C(=O)CCl	1	3	3	3	Good	3.95835	In	10	0.293304	0.580724
1634	Triazamate	CCOC(=O)CSC1=NC(=NN1C(=O)N(C)C)C(C)(C)C	1	3	3	3	Good	3.95794	In	4	0.0764736	0.770275
1694	Zoxamide	CCC(C)(C(=O)CCl)NC(=O)C1=CC(=C(C(=C1)Cl)C)Cl	1	3	3	3	Good	3.9579	In	4	0.0765036	0.770185
161	Benazolin-ethyl	CCOC(=O)CN1C2=C(C=CC=C2Cl)SC1=O	1	3	3	3	Good	3.95764	In	4	0.0767145	0.769552
1327	Picloram-isoctyl	CC(C)CCCCCOC(=O)C1=NC(=C(C(=C1Cl)N)Cl)Cl	1	3	3	3	Good	3.95705	In	4	0.0771787	0.768157
64	Acetochlor	CCC1=CC=CC(=C1N(COCC)C(=O)CCl)C	1	3	3	3	Good	3.95654	In	10	0.293566	0.578929
79	Alachlor	CCC1=C(C(=CC=C1)CC)N(COC)C(=O)CCl	1	3	3	3	Good	3.95654	In	10	0.293566	0.578929
1382	Propisochlor	CCC1=CC=CC(=C1N(COC(C)C)C(=O)CCl)C	1	3	3	3	Good	3.95523	In	10	0.29376	0.577624
499	Delachlor	CC1=C(C(=CC=C1)C)N(COCC(C)C)C(=O)CCl	1	3	3	3	Good	3.95359	In	10	0.294008	0.575995
953	Hexadecanoic acid	CCCCCCCCCCCCCCCC(=O)O	1	3	3	3	Good	3.95186	In	4	0.0812953	0.755791
455	Cycloprothrin	CCOC1=CC=C(C=C1)C2(CC2(Cl)Cl)C(=O)OC(C#N)C3=CC(=CC=C3)OC4=CC=CC=C4	1	3	3	3	Good	3.95163	In	4	0.081475	0.755251
1518	Sulcofuron	C1=CC(=C(C=C1NC(=O)NC2=C(C=CC(=C2)Cl)OC3=C(C=C(C=C3)Cl)S(=O)(=O)O)Cl)Cl	1	3	3	3	Good	3.95117	In	4	0.0818383	0.75416
1519	Sulcofuron-sodium	C1=CC(=C(C=C1NC(=O)NC2=C(C=CC(=C2)Cl)OC3=C(C=C(C=C3)Cl)S(=O)(=O)[O-])Cl)Cl	1	3	3	3	Good	3.94491	In	4	0.0868041	0.739243
1648	Triclopyricarb	COC(=O)N(C1=CC=CC=C1COC2=NC(=C(C=C2Cl)Cl)Cl)OC	1	3	3	3	Good	3.94367	In	4	0.0877862	0.736292
1413	Pyraoxystrobin	CN1C(=CC(=N1)C2=CC=C(C=C2)Cl)OCC3=CC=CC=C3C(=COC)C(=O)OC	1	3	3	3	Good	3.94094	In	10	0.29611	0.563449
990	Indanofan	CCC1(C(=O)C2=CC=CC=C2C1=O)CC3(CO3)C4=CC(=CC=C4)Cl	1	3	3	3	Good	3.94052	In	10	0.296187	0.563024
1603	Tigolaner	CN1C(=C(C(=N1)C(C(F)(F)F)(F)F)C(F)(F)F)N2C=C(C=N2)C3=CC(=C(C=C3)Cl)C(=O)NC4(CC4)C#N	1	3	3	3	Good	3.94022	In	4	0.0905187	0.728084
829	Flumiclorac-pentyl	CCCCCOC(=O)COC1=C(C=C(C(=C1)N2C(=O)C3=C(C2=O)CCCC3)F)Cl	1	3	3	3	Good	3.93649	In	4	0.0934773	0.719197
873	Fluthiacet	C1CCN2C(=O)SC(=NC3=CC(=C(C=C3F)Cl)SCC(=O)O)N2C1	1	3	3	3	Good	3.93517	In	4	0.0945203	0.716063
242	Bromopropylate	CC(C)OC(=O)C(C1=CC=C(C=C1)Br)(C2=CC=C(C=C2)Br)O	1	3	3	3	Good	3.93498	In	4	0.0946763	0.715595
1087	Mandestrobin	CC1=CC(=C(C=C1)C)OCC2=CC=CC=C2C(C(=O)NC)OC	1	3	3	3	Good	3.93426	In	10	0.297356	0.556813
1303	Peroxyacetic acid	CC(=O)OO	1	3	3	3	Good	3.93397	In	4	0.0954751	0.713195
330	Chlordecone	C1(=O)C2(C3(C4(C1(C5(C2(C3(C(C45Cl)(Cl)Cl)Cl)Cl)Cl)Cl)Cl)Cl)Cl	1	3	3	3	Good	3.93384	In	4	0.0955806	0.712878
612	Dinosulfon	CCCCCCC(C)C1=CC(=CC(=C1OC(=O)SC)[N+](=O)[O-])[N+](=O)[O-]	1	3	3	3	Good	3.92992	In	4	0.0986832	0.703558
195	Benzoximate	CCON=C(C1=C(C=CC(=C1OC)Cl)OC)OC(=O)C2=CC=CC=C2	1	3	3	3	Good	3.92929	In	4	0.0991854	0.70205
350	Chlorflurenol methyl	COC(=O)C1(C2=CC=CC=C2C3=C1C=C(C=C3)Cl)O	1	3	3	3	Good	3.92503	In	4	0.102564	0.691901
50	2-methoxyethylmercury acetate	CC(=O)O[Hg]CCOC	1	3	3	3	Good	3.92459	In	10	0.299322	0.547216
1385	Propyl isome	CCCOC(=O)C1C(CC2=CC3=C(C=C2C1C(=O)OCCC)OCO3)C	1	3	3	3	Good	3.92367	In	4	0.103639	0.68867
1050	Isoxaflutole	CS(=O)(=O)C1=C(C=CC(=C1)C(F)(F)F)C(=O)C2=C(ON=C2)C3CC3	1	3	3	3	Good	3.92095	In	4	0.105792	0.682204
611	Dinoseb acetate	CCC(C)C1=CC(=CC(=C1OC(=O)C)[N+](=O)[O-])[N+](=O)[O-]	1	3	3	3	Good	3.92058	In	4	0.106087	0.681317
562	Diethatyl ethyl	CCC1=C(C(=CC=C1)CC)N(CC(=O)OCC)C(=O)CCl	1	3	3	3	Good	3.91952	In	4	0.106929	0.678787
1328	Picloram-methyl	COC(=O)C1=NC(=C(C(=C1Cl)N)Cl)Cl	1	3	3	3	Good	3.91765	In	4	0.108411	0.674336
1119	Medinoterb acetate	CC1=C(C=C(C(=C1[N+](=O)[O-])OC(=O)C)C(C)(C)C)[N+](=O)[O-]	1	3	3	3	Good	3.91605	In	4	0.109682	0.670517
77	AD-67	C1CCC2(CC1)N(CCO2)C(=O)C(Cl)Cl	1	3	3	3	Good	3.91596	In	4	0.300083	0.466174
615	Dinoterb acetate	CC(=O)OC1=C(C=C(C=C1[N+](=O)[O-])[N+](=O)[O-])C(C)(C)C	1	3	3	3	Good	3.91398	In	4	0.111321	0.665594
1401	Pydiflumetofen	CC(CC1=C(C=C(C=C1Cl)Cl)Cl)N(C(=O)C2=CN(N=C2C(F)F)C)OC	1	3	3	3	Good	3.91264	In	4	0.112381	0.662412
397	Clacyfos	CC(OC(=O)COC1=C(C=C(C=C1)Cl)Cl)P(=O)(OC)OC	1	3	3	3	Good	3.91181	In	4	0.113039	0.660435
358	Chlorobenzilate	CCOC(=O)C(C1=CC=C(C=C1)Cl)(C2=CC=C(C=C2)Cl)O	1	3	3	3	Good	3.90796	In	4	0.116091	0.651265
364	Chloropropylate	CC(C)OC(=O)C(C1=CC=C(C=C1)Cl)(C2=CC=C(C=C2)Cl)O	1	3	3	3	Good	3.90679	In	4	0.117022	0.648468
83	Aldoxycarb	CC(C)(C=NOC(=O)NC)S(=O)(=O)C	1	3	3	3	Good	3.90604	In	4	0.117616	0.646684
1381	Propionic acid	CCC(=O)O	1	3	3	3	Good	3.90578	In	4	0.117821	0.646068
32	2,2-dibromo-3-nitrilopropionamide	C(#N)C(C(=O)N)(Br)Br	1	3	3	3	Good	3.90343	In	4	0.119683	0.640474
665	Erbon	CC(C(=O)OCCOC1=CC(=C(C=C1Cl)Cl)Cl)(Cl)Cl	1	3	3	3	Good	3.90327	In	4	0.119807	0.640103
878	Fluvalinate	CC(C)C(C(=O)OC(C#N)C1=CC(=CC=C1)OC2=CC=CC=C2)NC3=C(C=C(C=C3)C(F)(F)F)Cl	1	3	3	3	Good	3.90197	In	4	0.12084	0.637
1535	Tau-fluvalinate	CC(C)C(C(=O)OC(C#N)C1=CC(=CC=C1)OC2=CC=CC=C2)NC3=C(C=C(C=C3)C(F)(F)F)Cl	1	3	3	3	Good	3.90197	In	4	0.12084	0.637
1028	Isoflucypram	FC(F)c1nn(C)c(F)c1C(=O)N(Cc1cc(Cl)ccc1C(C)C)C1CC1	1	3	3	3	Good	3.90018	In	4	0.12226	0.632734
167	Benfuracarb	CCOC(=O)CCN(C(C)C)SN(C)C(=O)OC1=CC=CC2=C1OC(C2)(C)C	1	3	3	3	Good	3.89971	In	4	0.122632	0.631616
905	Furametpyr	CC1C2=C(C=CC=C2NC(=O)C3=C(N(N=C3C)C)Cl)C(O1)(C)C	1	3	3	3	Good	3.8916	In	4	0.294388	0.479125
933	Halauxifen-methyl	COC1=C(C=CC(=C1F)C2=NC(=C(C(=C2)N)Cl)C(=O)OC)Cl	1	3	3	3	Good	3.88928	In	4	0.130899	0.606783
1059	Karbutilate	CC(C)(C)NC(=O)OC1=CC=CC(=C1)NC(=O)N(C)C	1	3	3	3	Good	3.88693	In	4	0.132764	0.601181
224	Bixafen	CN1C=C(C(=N1)C(F)F)C(=O)NC2=C(C=C(C=C2)F)C3=CC(=C(C=C3)Cl)Cl	1	3	3	3	Good	3.88526	In	4	0.13409	0.597198
1014	Iprovalicarb	CC1=CC=C(C=C1)C(C)NC(=O)C(C(C)C)NC(=O)OC(C)C	1	3	3	3	Good	3.88493	In	4	0.13435	0.596416
1088	Mandipropamid	COC1=C(C=CC(=C1)CCNC(=O)C(C2=CC=C(C=C2)Cl)OCC#C)OCC#C	1	3	3	3	Good	3.88343	In	4	0.292737	0.483635
28	1-naphthylacetic acid	C1=CC=C2C(=C1)C=CC=C2CC(=O)O	1	3	3	3	Good	3.88292	In	4	0.135939	0.591642
1137	Metaflumizone	C1=CC(=CC(=C1)C(F)(F)F)C(=NNC(=O)NC2=CC=C(C=C2)OC(F)(F)F)CC3=CC=C(C=C3)C#N	1	3	3	3	Good	3.88166	In	4	0.136936	0.588648
1299	Penthiopyrad	CC(C)CC(C)C1=C(C=CS1)NC(=O)C2=CN(N=C2C(F)(F)F)C	1	3	3	3	Good	3.87844	In	4	0.139489	0.580979
1104	MCPB	CC1=C(C=CC(=C1)Cl)OCCCC(=O)O	1	3	3	3	Good	3.87826	In	4	0.139636	0.580538
99	Ametridione	CCSC1=NC(=O)N(C(=O)N1N)CC(C)(C)C	1	3	3	3	Good	3.87811	In	4	0.139754	0.580181
308	Cartap	CN(C)C(CSC(=O)N)CSC(=O)N	1	3	3	3	Good	3.87611	In	4	0.141341	0.575416
309	Cartap hydrochloride	CN(C)C(CSC(=O)N)CSC(=O)N.Cl	1	3	3	3	Good	3.87611	In	4	0.141341	0.575416
798	Fluazolate	CC(C)OC(=O)C1=C(C=C(C(=C1)C2=NN(C(=C2Br)C(F)(F)F)C)F)Cl	1	3	3	3	Good	3.87023	In	4	0.145997	0.56143
449	Cyclaniliprole	CC(C1CC1)NC(=O)C2=CC(=CC(=C2NC(=O)C3=CC(=NN3C4=C(C=CC=N4)Cl)Br)Br)Cl	1	3	3	3	Good	3.86941	In	4	0.146651	0.559465
197	Benzoylprop-ethyl	CCOC(=O)C(C)N(C1=CC(=C(C=C1)Cl)Cl)C(=O)C2=CC=CC=C2	1	3	3	3	Good	3.86932	In	4	0.146724	0.559245
876	Flutolanil	CC(C)OC1=CC=CC(=C1)NC(=O)C2=CC=CC=C2C(F)(F)F	1	3	3	3	Good	3.86801	In	4	0.147757	0.556142
38	2,4-DB	OC(=O)CCCOC1=C(Cl)C=C(Cl)C=C1	1	3	3	3	Good	3.86152	In	4	0.152904	0.540681
576	Diflufenican	C1=CC(=CC(=C1)OC2=C(C=CC=N2)C(=O)NC3=C(C=C(C=C3)F)F)C(F)(F)F	1	3	3	3	Good	3.86142	In	4	0.152985	0.540436
1679	Urea sulphate	NC(N)=O	1	3	3	3	Good	3.86114	In	4	0.153203	0.539783
1685	Vinegar	CC(=O)O	1	3	3	3	Good	3.86114	In	4	0.153203	0.539783
206	Bifenox	COC(=O)C1=C(C=CC(=C1)OC2=C(C=C(C=C2)Cl)Cl)[N+](=O)[O-]	1	3	3	3	Good	3.86084	In	4	0.153444	0.539059
347	Chlorfluren	C1=CC=C2C3=C(C=C(C=C3)Cl)C(C2=C1)C(=O)O	1	3	3	3	Good	3.86042	In	4	0.153774	0.538067
102	Amicarbazone	CC(C)C1=NN(C(=O)N1N)C(=O)NC(C)(C)C	1	3	3	3	Good	3.85556	In	4	0.157631	0.52648
800	Flubeneteram	CN1C=C(C(=N1)C(F)F)C(=O)NC2=CC=CC=C2OC3=C(C=C(C=C3)C(F)(F)F)Cl	1	3	3	3	Good	3.85079	In	38	0.154497	0
551	Dicloromezotiaz	CC1=C2N(C(=C(C(=O)[N+]2=CC=C1)C3=CC(=CC(=C3)Cl)Cl)[O-])CC4=CN=C(S4)Cl	1	3	3	3	Good	3.84981	In	38	0.1538	0
903	Furalaxyl	CC1=C(C(=CC=C1)C)N(C(C)C(=O)OC)C(=O)C2=CC=CO2	1	3	3	3	Good	3.84839	In	38	0.152783	0
785	Flometoquin	CCC1=NC2=CC(=C(C=C2C(=C1C)OC(=O)OC)OC3=CC=C(C=C3)OC(F)(F)F)C	1	3	3	3	Good	3.84749	In	38	0.152143	0
321	Chlorantraniliprole	CC1=C(C(=CC(=C1)Cl)C(=O)NC)NC(=O)C2=CC(=NN2C3=C(C=CC=N3)Cl)Br	1	3	3	3	Good	3.84651	In	38	0.151439	0
1365	Promacyl	CCCC(=O)N(C)C(=O)OC1=CC(=CC(=C1)C(C)C)C	1	3	3	3	Good	3.8461	In	38	0.15115	0
33	2,3,5-tri-iodobenzoic acid	C1=C(C=C(C(=C1I)I)C(=O)O)I	1	3	3	3	Good	3.84509	In	38	0.150425	0
880	Fluxapyroxad	CN1C=C(C(=N1)C(F)F)C(=O)NC2=CC=CC=C2C3=CC(=C(C(=C3)F)F)F	1	3	3	3	Good	3.84418	In	38	0.149779	0
58	ACC	C1CC1(C(=O)O)N	1	3	3	3	Good	3.84352	In	38	0.149307	0
910	Furilazole	CC1(N(CC(O1)C2=CC=CO2)C(=O)C(Cl)Cl)C	1	3	3	3	Good	3.84297	In	4	0.286588	0.507273
1183	Metobenzuron	CC1(CC(OC2=C1C=CC(=C2)OC3=CC=C(C=C3)NC(=O)N(C)OC)(C)OC)C	1	3	3	3	Good	3.838	In	4	0.286072	0.510337
193	Benzoic acid	C1=CC=C(C=C1)C(=O)O	1	3	3	3	Good	3.83793	In	38	0.145314	0
1691	Zarilamid	CCOC(C#N)NC(=O)C1=CC=C(C=C1)Cl	1	3	3	3	Good	3.83793	In	4	0.286065	0.510379
1271	Oxamyl	CNC(=O)ON=C(C(=O)N(C)C)SC	1	3	3	3	Good	3.83441	In	38	0.142801	0
970	Imazamethabenz	CC1=CC(=C(C=C1)C(=O)O)C2=NC(C(=O)N2)(C)C(C)C	1	3	3	3	Good	3.83424	In	38	0.142678	0
426	Copper naphthenate	CCC1CCC(CCC([O-])=O)CC1	1	3	3	3	Good	3.83183	In	38	0.140957	0
1307	Phenobenzuron	CN(C)C(=O)N(C1=CC(=C(C=C1)Cl)Cl)C(=O)C2=CC=CC=C2	1	3	3	3	Good	3.82822	In	38	0.138379	0
153	Azoxystrobin	COC=C(C1=CC=CC=C1OC2=NC=NC(=C2)OC3=CC=CC=C3C#N)C(=O)OC	1	3	3	3	Good	3.82389	In	4	0.284899	0.519235
839	Fluoroacetamide	C(C(=O)N)F	1	3	3	3	Good	3.82121	In	38	0.133369	0
1092	MCPA-butotyl	CCCCOCCOC(=O)COC1=C(C=C(C=C1)Cl)C	1	3	3	3	Good	3.81762	In	4	0.284517	0.523295
882	Folpet	C1=CC=C2C(=C1)C(=O)N(C2=O)SC(Cl)(Cl)Cl	1	3	3	3	Good	3.81597	In	38	0.129628	0
1045	Isoval	CC(C)CC(=O)C1C(=O)C2=CC=CC=C2C1=O	1	3	3	3	Good	3.8112	In	38	0.126222	0
1122	Mefenpyr diethyl	CCOC(=O)C1=NN(C(C1)(C)C(=O)OCC)C2=C(C=C(C=C2)Cl)Cl	1	3	3	3	Good	3.81091	In	38	0.126019	0
819	Flufenoxystrobin	COC=C(C1=CC=CC=C1COC2=C(C=C(C=C2)C(F)(F)F)Cl)C(=O)OC	1	3	3	3	Good	3.80876	In	4	0.284124	0.529139
789	Florpyrauxifen-benzyl	COC1=C(C=CC(=C1F)C2=NC(=C(C(=C2F)N)Cl)C(=O)OCC3=CC=CC=C3)Cl	1	3	3	3	Good	3.80858	In	38	0.124356	0
520	Dibutyl phthalate	CCCCOC(=O)C1=CC=CC=C1C(=O)OCCCC	1	3	3	3	Good	3.80616	In	38	0.122626	0
180	Benthiavalicarb-isopropyl	CC(C)C(C(=O)NC(C)C1=NC2=C(S1)C=C(C=C2)F)NC(=O)OC(C)C	1	3	3	3	Good	3.8027	In	38	0.120151	0
445	Cyantraniliprole	CC1=CC(=CC(=C1NC(=O)C2=CC(=NN2C3=C(C=CC=N3)Cl)Br)C(=O)NC)C#N	1	3	3	3	Good	3.80046	In	38	0.118551	0
296	Carbetamide	CCNC(=O)C(C)OC(=O)NC1=CC=CC=C1	1	3	3	3	Good	3.80037	In	38	0.118492	0
1023	Isocycloseram	CCN1C(=O)C(CO1)NC(=O)C2=C(C=C(C=C2)C3=NOC(C3)(C4=CC(=C(C(=C4)Cl)F)Cl)C(F)(F)F)C	1	3	3	3	Good	3.79902	In	38	0.117526	0
836	Fluopyram	C1=CC=C(C(=C1)C(=O)NCCC2=C(C=C(C=N2)C(F)(F)F)Cl)C(F)(F)F	1	3	3	3	Good	3.79816	In	38	0.116914	0
779	Flamprop-isopropyl	CC(C)OC(=O)C(C)N(C1=CC(=C(C=C1)F)Cl)C(=O)C2=CC=CC=C2	1	3	3	3	Good	3.79593	In	38	0.11532	0
781	Flamprop-M-isopropyl	CC(C)OC(=O)C(C)N(C1=CC(=C(C=C1)F)Cl)C(=O)C2=CC=CC=C2	1	3	3	3	Good	3.79593	In	38	0.11532	0
70	Acifluorfen-methyl	COC(=O)C1=C(C=CC(=C1)OC2=C(C=C(C=C2)C(F)(F)F)Cl)[N+](=O)[O-]	1	3	3	3	Good	3.79568	In	38	0.115138	0
904	Furalaxyl-M	CC1=C(C(=CC=C1)C)N(C(C)C(=O)OC)C(=O)C2=CC=C(C=C2)C(=O)C3=CC=CC=C3	1	3	3	3	Good	3.79537	In	38	0.114921	0
130	Anisuron	CN(C)C(=O)N(C1=CC(=C(C=C1)Cl)Cl)C(=O)C2=CC=C(C=C2)OC	1	3	3	3	Good	3.79252	In	38	0.112884	0
53	2-naphthyloxyacetic acid	c1ccc2cc(ccc2c1)OCC(=O)O	1	3	3	3	Good	3.79215	In	38	0.112618	0
786	Flonicamid	C1=CN=CC(=C1C(F)(F)F)C(=O)NCC#N	1	3	3	3	Good	3.79159	In	38	0.112221	0
1330	Picoxystrobin	COC=C(C1=CC=CC=C1COC2=CC=CC(=N2)C(F)(F)F)C(=O)OC	1	3	3	3	Good	3.79143	In	4	0.283858	0.537546
533	Dichlorprop-butotyl	CCCCOCCOC(=O)C(C)OC1=C(C=C(C=C1)Cl)Cl	1	3	3	3	Good	3.79021	In	4	0.283864	0.535984
1110	Mecoprop	CC1=C(C=CC(=C1)Cl)OC(C)C(=O)O	1	3	3	3	Good	3.78331	In	38	0.106307	0
1111	Mecoprop dimethylammonium	CC1=C(C=CC(=C1)Cl)OC(C)C(=O)O.CNC	1	3	3	3	Good	3.78331	In	38	0.106307	0
1114	Mecoprop trolamine	CC1=C(C=CC(=C1)Cl)OC(C)C(=O)O.C(CO)N(CCO)CCO	1	3	3	3	Good	3.78331	In	38	0.106307	0
1003	Iofensulfuron	CC1=NC(=NC(=N1)OC)NC(=O)NS(=O)(=O)C2=CC=CC=C2I	1	3	3	3	Good	3.78235	In	38	0.105621	0
1091	MCPA	CC1=C(C=CC(=C1)Cl)OCC(=O)O	1	3	3	3	Good	3.78096	In	38	0.10463	0
1094	MCPA-dimethylammonium	CC1=C(C=CC(=C1)Cl)OCC(=O)O.CNC	1	3	3	3	Good	3.78096	In	38	0.10463	0
1095	MCPA-diolamine	CC1=C(C=CC(=C1)Cl)OCC(=O)O.C(CO)NCCO	1	3	3	3	Good	3.78096	In	38	0.10463	0
1102	MCPA-olamine	CC1=C(OCC(O)=O)C=CC(Cl)=C1	1	3	3	3	Good	3.78096	In	38	0.10463	0
336	Chlorfenac	C1=CC(=C(C(=C1Cl)CC(=O)O)Cl)Cl	1	3	3	3	Good	3.77942	In	38	0.103528	0
1	(4-chlorophenoxy)acetic acid	C1=CC(=CC=C1OCC(=O)O)Cl	1	3	3	3	Good	3.77889	In	38	0.103153	0
780	Flamprop-methyl	CC(C(=O)OC)N(C1=CC(=C(C=C1)F)Cl)C(=O)C2=CC=CC=C2	1	3	3	3	Good	3.77699	In	38	0.101795	0
782	Flamprop-M-methyl	CC(C(=O)OC)N(C1=CC(=C(C=C1)F)Cl)C(=O)C2=CC=CC=C2	1	3	3	3	Good	3.77699	In	38	0.101795	0
412	Cloprop	CC(C(=O)O)OC1=CC(=CC=C1)Cl	1	3	3	3	Good	3.77656	In	38	0.101484	0
456	Cyclopyrimorate	CC1=CC=CC(=C1OC2=NN=C(C=C2OC(=O)N3CCOCC3)Cl)C4CC4	1	3	3	3	Good	3.77579	In	4	0.284188	0.51745
340	Chlorfenprop	C1=CC(=CC=C1CC(C(=O)O)Cl)Cl	1	3	3	3	Good	3.77498	In	38	0.100357	0
648	Eglinazine	CCNC1=NC(=NC(=N1)Cl)NCC(=O)O	1	3	3	3	Good	3.77494	In	38	0.10033	0
170	Benomyl	CCCCNC(=O)N1C2=CC=CC=C2N=C1NC(=O)OC	1	3	3	3	Good	3.77491	In	38	0.100307	0
1048	Isoxadifen	C1C(=NOC1(C2=CC=CC=C2)C3=CC=CC=C3)C(=O)O	1	3	3	3	Good	3.7749	In	38	0.100299	0
1361	Proglinazine	CC(C)NC1=NC(=NC(=N1)NCC(=O)O)Cl	1	3	3	3	Good	3.77417	In	38	0.0997821	0
407	Clofibric acid	CC(C)(C(=O)O)OC1=CC=C(C=C1)Cl	1	3	3	3	Good	3.77302	In	38	0.0989589	0
408	Clofop	CC(C(=O)O)OC1=CC=C(C=C1)OC2=CC=C(C=C2)Cl	1	3	3	3	Good	3.77257	In	38	0.098637	0
736	Fenoprop-butotyl	CCCCOCCOC(=O)C(C)OC1=CC(=C(C=C1Cl)Cl)Cl	1	3	3	3	Good	3.7696	In	4	0.284468	0.509488
1331	Pindone	CC(C)(C)C(=O)C1C(=O)C2=CC=CC=C2C1=O	1	3	3	3	Good	3.7694	In	38	0.0963752	0
762	Fenthiaprop	CC(C(=O)O)OC1=CC=C(C=C1)OC2=NC3=C(S2)C=C(C=C3)Cl	1	3	3	3	Good	3.7688	In	38	0.0959433	0
735	Fenoprop-butometyl	CCCCOCC(C)OC(=O)C(C)OC1=CC(=C(C=C1Cl)Cl)Cl	1	3	3	3	Good	3.76842	In	4	0.28453	0.507978
1108	Mecarbinzid	COC(=O)NC1=NC2=CC=CC=C2N1C(=O)NCCSC	1	3	3	3	Good	3.76606	In	38	0.0939838	0
547	Diclofop	CC(C(=O)O)OC1=CC=C(C=C1)OC2=C(C=C(C=C2)Cl)Cl	1	3	3	3	Good	3.76401	In	38	0.092524	0
105	Amidoflumet	COC(=O)C1=C(C=CC(=C1)Cl)NS(=O)(=O)C(F)(F)F	1	3	3	3	Good	3.76359	In	38	0.0922227	0
791	Fluacrypyrim	CC(C)OC1=NC(=CC(=N1)OCC2=CC=CC=C2C(=COC)C(=O)OC)C(F)(F)F	1	3	3	3	Good	3.76197	In	4	0.284928	0.499694
744	Fenoxaprop-P	CC(C(=O)O)OC1=CC=C(C=C1)OC2=NC3=C(O2)C=C(C=C3)Cl	1	3	3	3	Good	3.76034	In	38	0.0899036	0
770	Fentrazamide	CCN(C1CCCCC1)C(=O)N2C(=O)N(N=N2)C3=CC=CC=C3Cl	1	3	3	3	Good	3.76015	In	38	0.0897694	0
484	Cyprosulfamide	COC1=CC=CC=C1C(=O)NS(=O)(=O)C2=CC=C(C=C2)C(=O)NC3CC3	1	3	3	3	Good	3.75895	In	38	0.0889122	0
322	Chlorazifop	CC(C(=O)O)OC1=CC=C(C=C1)OC2=C(C=C(C=N2)Cl)Cl	1	3	3	3	Good	3.75894	In	38	0.0889002	0
135	Asulam	COC(=O)NS(=O)(=O)C1=CC=C(C=C1)N	1	3	3	3	Good	3.75863	In	38	0.0886829	0
380	Chlorsulfuron	CC1=NC(=NC(=N1)OC)NC(=O)NS(=O)(=O)C2=CC=CC=C2Cl	1	3	3	3	Good	3.75429	In	38	0.0855783	0
532	Dichlorprop	CC(C(=O)O)OC1=C(C=C(C=C1)Cl)Cl	1	3	3	3	Good	3.75355	In	38	0.0850562	0
534	Dichlorprop-dimethylammonium	CC(C(=O)O)OC1=C(C=C(C=C1)Cl)Cl.CNC	1	3	3	3	Good	3.75355	In	38	0.0850562	0
537	Dichlorprop-P	CC(C(=O)O)OC1=C(C=C(C=C1)Cl)Cl	1	3	3	3	Good	3.75355	In	38	0.0850562	0
541	Dichlorprop-P	CC(C(=O)O)OC1=C(C=C(C=C1)Cl)Cl	1	3	3	3	Good	3.75355	In	38	0.0850562	0
809	Flucofuron	C1=CC(=C(C=C1NC(=O)NC2=CC(=C(C=C2)Cl)C(F)(F)F)C(F)(F)F)Cl	1	3	3	3	Good	3.7535	In	38	0.085015	0
1305	Phenisopham	CCN(C1=CC=CC=C1)C(=O)OC2=CC=CC(=C2)NC(=O)OC(C)C	1	3	3	3	Good	3.7524	In	38	0.0842298	0
37	2,4-D	C1=CC(=C(C=C1Cl)Cl)OCC(=O)O	1	3	3	3	Good	3.7512	In	38	0.0833785	0
39	2,4-D-dimethylammonium	OC(=O)COC1=C(Cl)C=C(Cl)C=C1	1	3	3	3	Good	3.7512	In	38	0.0833785	0
1633	Triasulfuron	CC1=NC(=NC(=N1)OC)NC(=O)NS(=O)(=O)C2=CC=CC=C2OCCCl	1	3	3	3	Good	3.75063	In	38	0.0829701	0
940	Haloxyfop-etotyl	CCOCCOC(=O)C(C)OC1=CC=C(C=C1)OC2=C(C=C(C=N2)C(F)(F)F)Cl	1	3	3	3	Good	3.75058	In	4	0.285852	0.485052
1457	Quinmerac	CC1=CN=C2C(=C1)C=CC(=C2C(=O)O)Cl	1	3	3	3	Good	3.7493	In	38	0.082015	0
1627	Triafamone	CN(C1=C(C=CC=C1F)C(=O)C2=NC(=NC(=N2)OC)OC)S(=O)(=O)C(F)F	1	3	3	3	Good	3.74829	In	38	0.081298	0
1647	Triclopyr-butotyl	CCCCOCCOC(=O)COC1=NC(=C(C=C1Cl)Cl)Cl	1	3	3	3	Good	3.74695	In	4	0.286207	0.480381
419	Cloxyfonac	C1=CC(=C(C=C1Cl)CO)OCC(=O)O	1	3	3	3	Good	3.74313	In	38	0.0776149	0
401	Clodinafop	CC(C(=O)O)OC1=CC=C(C=C1)OC2=NC=C(C=C2F)Cl	1	3	3	3	Good	3.74263	In	38	0.0772532	0
994	Indolauxipyr-cyanomethyl	C1=CC(=C(C2=C1C=CN2)F)C3=NC(=C(C(=C3F)N)Cl)C(=O)OCC#N	1	3	3	3	Good	3.74173	In	38	0.076615	0
466	Cyhalofop	CC(C(=O)O)OC1=CC=C(C=C1)OC2=C(C=C(C=C2)C#N)F	1	3	3	3	Good	3.74132	In	38	0.0763198	0
1441	Pyriminostrobin	COC=C(C1=CC=CC=C1COC2=NC(=NC(=C2)C(F)(F)F)NC3=C(C=C(C=C3)Cl)Cl)C(=O)OC	1	3	3	3	Good	3.74065	In	4	0.286888	0.472287
1578	Thiazopyr	CC(C)CC1=C(C(=NC(=C1C(=O)OC)C(F)F)C(F)(F)F)C2=NCCS2	1	3	3	3	Good	3.73826	In	38	0.074134	0
473	Cypendazole	COC(=O)NC1=NC2=CC=CC=C2N1C(=O)NCCCCCC#N	1	3	3	3	Good	3.73722	In	38	0.0733891	0
980	Imazethapyr	CCC1=CN=C(C(=C1)C(=O)O)C2=NC(C(=O)N2)(C)C(C)C	1	3	3	3	Good	3.73633	In	38	0.0727559	0
121	Ammonium acetate	CC(=O)[O-]	1	3	3	3	Good	3.73428	In	38	0.0712933	0
403	Cloethocarb	CNC(=O)OC1=CC=CC=C1OC(CCl)OC	1	3	3	3	Good	3.7342	In	4	0.287675	0.463992
1591	Thiomersal	CC[Hg]SC1=CC=CC=C1C(=O)[O-]	1	3	3	3	Good	3.73363	In	38	0.0708246	0
734	Fenoprop	CC(C(=O)O)OC1=CC(=C(C=C1Cl)Cl)Cl	1	3	3	3	Good	3.73294	In	38	0.0703334	0
949	Hexachloroacetone	C(=O)(C(Cl)(Cl)Cl)C(Cl)(Cl)Cl	1	3	3	3	Good	3.73193	In	38	0.0696156	0
1643	Trichlamide	CCCCOC(C(Cl)(Cl)Cl)NC(=O)C1=CC=CC=C1O	1	3	3	3	Good	3.73186	In	4	0.287981	0.460992
36	2,4,5-trichlorophenoxyacetic acid	C1=C(C(=CC(=C1Cl)Cl)Cl)OCC(=O)O	1	3	3	3	Good	3.73059	In	38	0.0686556	0
609	Dinopenton	CCCC(C)C1=CC(=CC(=C1OC(=O)OC(C)C)[N+](=O)[O-])[N+](=O)[O-]	1	3	3	3	Good	3.73048	In	38	0.0685759	0
862	Flurazole	C1=CC=C(C=C1)COC(=O)C2=C(N=C(S2)Cl)C(F)(F)F	1	3	3	3	Good	3.72986	In	38	0.0681318	0
605	Dinobuton	CCC(C)C1=CC(=CC(=C1OC(=O)OC(C)C)[N+](=O)[O-])[N+](=O)[O-]	1	3	3	3	Good	3.72794	In	38	0.0667655	0
1455	Quinclorac	C1=CC(=C(C2=NC=C(C=C21)Cl)C(=O)O)Cl	1	3	3	3	Good	3.72743	In	38	0.0664019	0
793	Fluazifop	CC(C(=O)O)OC1=CC=C(C=C1)OC2=NC=C(C=C2)C(F)(F)F	1	3	3	3	Good	3.7269	In	38	0.0660189	0
795	Fluazifop-P	CC(C(=O)O)OC1=CC=C(C=C1)OC2=NC=C(C=C2)C(F)(F)F	1	3	3	3	Good	3.7269	In	38	0.0660189	0
594	Dimethyl phthalate	COC(=O)C1=CC=CC=C1C(=O)OC	1	3	3	3	Good	3.72582	In	38	0.0652535	0
973	Imazapic	CC1=CN=C(C(=C1)C(=O)O)C2=NC(C(=O)N2)(C)C(C)C	1	3	3	3	Good	3.72541	In	38	0.0649558	0
974	Imazapic-ammonium	CC(C)C1(C)N=C(NC1=O)C1=C(C=C(C)C=N1)C(O)=O	1	3	3	3	Good	3.72541	In	38	0.0649558	0
1586	Thifluzamide	CC1=NC(=C(S1)C(=O)NC2=C(C=C(C=C2Br)OC(F)(F)F)Br)C(F)(F)F	1	3	3	3	Good	3.72433	In	38	0.0641847	0
982	Imazosulfuron	COC1=CC(=NC(=N1)NC(=O)NS(=O)(=O)C2=C(N=C3N2C=CC=C3)Cl)OC	1	3	3	3	Good	3.72359	In	38	0.063661	0
143	Azimsulfuron	CN1C(=C(C=N1)C2=NN(N=N2)C)S(=O)(=O)NC(=O)NC3=NC(=CC(=N3)OC)OC	1	3	3	3	Good	3.71998	In	38	0.0610798	0
906	Furathiocarb	CCCCOC(=O)N(C)SN(C)C(=O)OC1=CC=CC2=C1OC(C2)(C)C	1	3	3	3	Good	3.71958	In	38	0.0607908	0
607	Dinocton	CC(C)CCCCCC1=CC(=CC(=C1OC(=O)OC)[N+](=O)[O-])[N+](=O)[O-]	1	3	3	3	Good	3.71925	In	38	0.0605595	0
1004	Iofensulfuron sodium	CC1=NC(=NC(=N1)OC)NC(=NS(=O)(=O)C2=CC=CC=C2I)[O-]	1	3	3	3	Good	3.71892	In	38	0.0603231	0
975	Imazapyr	CC(C)C1(C(=O)NC(=N1)C2=C(C=CC=N2)C(=O)O)C	1	3	3	3	Good	3.71873	In	38	0.0601837	0
939	Haloxyfop	CC(C(=O)O)OC1=CC=C(C=C1)OC2=C(C=C(C=N2)C(F)(F)F)Cl	1	3	3	3	Good	3.71834	In	38	0.0599059	0
941	Haloxyfop-P	CC(C(=O)O)OC1=CC=C(C=C1)OC2=C(C=C(C=N2)C(F)(F)F)Cl	1	3	3	3	Good	3.71834	In	38	0.0599059	0
1387	Propyrisulfuron	CCCC1=NN2C(=NC(=C2S(=O)(=O)NC(=O)NC3=NC(=CC(=N3)OC)OC)Cl)C=C1	1	3	3	3	Good	3.71363	In	38	0.0565413	0
976	Imazaquin	CC(C)C1(C(=O)NC(=N1)C2=NC3=CC=CC=C3C=C2C(=O)O)C	1	3	3	3	Good	3.7115	In	38	0.0550203	0
1646	Triclopyr	C1=C(C(=NC(=C1Cl)Cl)OCC(=O)O)Cl	1	3	3	3	Good	3.71029	In	38	0.0541602	0
1649	Triclopyr-triethylammonium	CCN(CC)CC.C1=C(C(=NC(=C1Cl)Cl)OCC(=O)O)Cl	1	3	3	3	Good	3.71029	In	38	0.0541602	0
1210	Monosulfuron	CC1=NC(=NC=C1)NC(=O)NS(=O)(=O)C2=CC=CC=C2[N+](=O)[O-]	1	3	3	3	Good	3.7102	In	38	0.054097	0
1417	Pyraziflumid	C1=CC=C(C(=C1)C2=CC(=C(C=C2)F)F)NC(=O)C3=NC=CN=C3C(F)(F)F	1	3	3	3	Good	3.70866	In	38	0.0529923	0
694	Ethoxysulfuron	CCOC1=CC=CC=C1OS(=O)(=O)NC(=O)NC2=NC(=CC(=N2)OC)OC	1	3	3	3	Good	3.70571	In	38	0.0508913	0
915	Glufosinate	CP(=O)(CCC(C(=O)O)N)O	1	3	3	3	Good	3.70536	In	38	0.0506406	0
316	Chloramben	C1=C(C=C(C(=C1N)Cl)C(=O)O)Cl	1	3	2	2	Moderate	3.70337	In	38	0.0492145	0
921	Glyphosate	C(C(=O)O)NCP(=O)(O)O	1	3	2	2	Moderate	3.70301	In	38	0.0489629	0
922	Glyphosate-dimethylammonium	CNC.C(C(=O)O)NCP(=O)(O)O	1	3	2	2	Moderate	3.70301	In	38	0.0489629	0
923	Glyphosate-isopropylamine	CC(C)N.C(C(=O)O)NCP(=O)(O)O	1	3	2	2	Moderate	3.70301	In	38	0.0489629	0
924	Glyphosate-monoammonium	OC(=O)CNCP(O)(O)=O	1	3	2	2	Moderate	3.70301	In	38	0.0489629	0
1060	Kelevan	CCOC(=O)CCC(=O)CC1(C2(C3(C4(C1(C5(C2(C3(C(C45Cl)(Cl)Cl)Cl)Cl)Cl)Cl)Cl)Cl)Cl)O	1	3	2	2	Moderate	3.70012	In	38	0.0468942	0
807	Fluchloraminopyr-tefuryl	CC(C(=O)OCC1CCCO1)OC2=NC(=C(C(=C2Cl)N)Cl)F	1	3	3	3	Good	3.69962	In	4	0.293376	0.41955
619	Diphacinone	C1=CC=C(C=C1)C(C2=CC=CC=C2)C(=O)C3C(=O)C4=CC=CC=C4C3=O	1	3	2	2	Moderate	3.696	In	38	0.0439547	0
136	Asulam sodium	COC(=O)[N-]S(=O)(=O)C1=CC=C(C=C1)N	1	3	2	2	Moderate	3.6952	In	38	0.0433845	0
1568	Tetramethylfluthrin	CC1(C(C1(C)C)C(=O)OCC2=C(C(=C(C(=C2F)F)COC)F)F)C	1	3	3	3	Good	3.69412	In	4	0.294508	0.412478
521	Dicamba	COC1=C(C=CC(=C1C(=O)O)Cl)Cl	1	3	2	2	Moderate	3.69404	In	38	0.042554	0
523	Dicamba diolamine	COC1=C(Cl)C=CC(Cl)=C1C(O)=O	1	3	2	2	Moderate	3.69404	In	38	0.042554	0
544	Dichlozoline	CC1(C(=O)N(C(=O)O1)C2=CC(=CC(=C2)Cl)Cl)C	1	3	2	2	Moderate	3.6916	In	38	0.0408148	0
925	Glyphosate-trimesium	OC(=O)CNCP(O)([O-])=O	1	3	2	2	Moderate	3.68892	In	38	0.0388966	0
509	Desmedipham	CCOC(=O)NC1=CC(=CC=C1)OC(=O)NC2=CC=CC=C2	1	3	2	2	Moderate	3.68865	In	38	0.0387026	0
109	Aminocyclopyrachlor	C1CC1C2=NC(=C(C(=N2)N)Cl)C(=O)O	1	3	2	2	Moderate	3.68777	In	38	0.0380745	0
1594	Thiophanate	CCOC(=O)NC(=S)NC1=CC=CC=C1NC(=S)NC(=O)OCC	1	3	2	2	Moderate	3.68439	In	38	0.0356647	0
414	Clopyralid	C1=CC(=NC(=C1Cl)C(=O)O)Cl	1	3	2	2	Moderate	3.68377	In	38	0.0352224	0
415	Clopyralid-olamine	C1=CC(=NC(=C1Cl)C(=O)O)Cl.C(CO)N	1	3	2	2	Moderate	3.68377	In	38	0.0352224	0
792	Fluazaindolizine	COC1=CC(=C(C=C1)Cl)S(=O)(=O)NC(=O)C2=CN3C=C(C=C(C3=N2)Cl)C(F)(F)F	1	3	2	2	Moderate	3.68364	In	38	0.0351257	0
375	Chlorprocarb	CCC(CCl)NC(=O)OC1=CC=CC(=C1)NC(=O)OC	1	3	2	2	Moderate	3.68143	In	38	0.0335469	0
34	2,3,6-TBA	C1=CC(=C(C(=C1Cl)C(=O)O)Cl)Cl	1	3	2	2	Moderate	3.68142	In	38	0.0335446	0
1221	N-(3-chloro-2,6-dimethylphenyl)-2-methoxy-N-(tetrahydr-2-oxo-3-furanyl)acetamide	COCC(=O)N(C1CCOC1=O)c2c(C)ccc(Cl)c2C	1	3	3	3	Good	3.68118	In	4	0.297407	0.395848
1391	Prosulfuron	CC1=NC(=NC(=N1)OC)NC(=O)NS(=O)(=O)C2=CC=CC=C2CCC(F)(F)F	1	3	2	2	Moderate	3.67709	In	38	0.0304501	0
810	Flucycloxuron	C1CC1C(=NOCC2=CC=C(C=C2)NC(=O)NC(=O)C3=C(C=CC=C3F)F)C4=CC=C(C=C4)Cl	1	3	2	2	Moderate	3.67274	In	38	0.0273404	0
1190	Metoxadiazone	COC1=CC=CC=C1N2C(=O)OC(=N2)OC	1	2	3	3	Good	3.66201	In	4	0.302288	0.371216
1501	Sodium monochloroacetate	C(C(=O)[O-])Cl	1	2	2	2	Moderate	3.65989	In	38	0.0181655	0
1148	Metcamifen	CNC(=O)NC1=CC=C(C=C1)S(=O)(=O)NC(=O)C2=CC=CC=C2OC	1	2	2	2	Moderate	3.65915	In	38	0.0176381	0
1526	Sulfosulfuron	CCS(=O)(=O)C1=C(N2C=CC=CC2=N1)S(=O)(=O)NC(=O)NC3=NC(=CC(=N3)OC)OC	1	2	2	2	Moderate	3.65724	In	38	0.0162754	0
1471	Rimsulfuron	CCS(=O)(=O)C1=C(N=CC=C1)S(=O)(=O)NC(=O)NC2=NC(=CC(=N2)OC)OC	1	2	2	2	Moderate	3.65713	In	38	0.0161989	0
710	Famoxadone	CC1(C(=O)N(C(=O)O1)NC2=CC=CC=C2)C3=CC=C(C=C3)OC4=CC=CC=C4	1	2	2	2	Moderate	3.65631	In	38	0.0156085	0
490	Daminozide	CN(C)NC(=O)CCC(=O)O	1	2	2	2	Moderate	3.65502	In	38	0.0146891	0
1642	Tricamba	COc1c(Cl)cc(Cl)c(Cl)c1C(=O)O	1	2	2	2	Moderate	3.65499	In	38	0.0146703	0
863	Flurenol	C1=CC=C2C(=C1)C3=CC=CC=C3C2(C(=O)O)O	1	2	2	2	Moderate	3.65436	In	38	0.0142173	0
806	Fluchloraminopyr	CC(C(=O)O)OC1=NC(=C(C(=C1Cl)N)Cl)F	1	2	2	2	Moderate	3.6529	In	38	0.0131759	0
457	Cyclosulfamuron	COC1=CC(=NC(=N1)NC(=O)NS(=O)(=O)NC2=CC=CC=C2C(=O)C3CC3)OC	1	2	2	2	Moderate	3.65132	In	38	0.0120476	0
867	Fluroxypyr	C(C(=O)O)OC1=NC(=C(C(=C1Cl)N)Cl)F	1	2	2	2	Moderate	3.65055	In	38	0.0114982	0
360	Chlorophacinone	C1=CC=C(C=C1)C(C2=CC=C(C=C2)Cl)C(=O)C3C(=O)C4=CC=CC=C4C3=O	1	2	2	2	Moderate	3.65004	In	38	0.0111343	0
1138	Metalaxyl	CC1=C(C(=CC=C1)C)N(C(C)C(=O)OC)C(=O)COC	1	2	3	3	Good	3.64916	In	4	0.30594	0.354701
1139	Metalaxyl-M	CC1=C(C(=CC=C1)C)N(C(C)C(=O)OC)C(=O)COC	1	2	3	3	Good	3.64916	In	4	0.30594	0.354701
718	Fenazaflor	C1=CC=C(C=C1)OC(=O)N2C3=CC(=C(C=C3N=C2C(F)(F)F)Cl)Cl	1	2	2	2	Moderate	3.64708	In	38	0.00902112	0
723	Fenchlorazole-ethyl	C1=CC=C(C=C1)OC(=O)N2C3=CC(=C(C=C3N=C2C(F)(F)F)Cl)Cl	1	2	2	2	Moderate	3.64708	In	38	0.00902112	0
112	Aminopyralid	C1=C(C(=C(N=C1Cl)C(=O)O)Cl)N	1	2	2	2	Moderate	3.64698	In	38	0.00894927	0
113	Aminopyralid-dimethylammonium	NC1=CC(Cl)=NC(C(O)=O)=C1Cl	1	2	2	2	Moderate	3.64698	In	38	0.00894927	0
1465	Quintrione	C1CC(=O)C(C(=O)C1)C(=O)C2=C(C=CC3=CC(=CN=C32)Cl)Cl	1	2	2	2	Moderate	3.6458	In	38	0.00810671	0
1673	Tripyrasulfone	CC1=CC(=NN1CC2=C(C=CC(=C2Cl)C(=O)C3=C(N(N=C3C)C)OC(=O)C4=CN(N=C4C)C)S(=O)(=O)C)C	1	2	2	2	Moderate	3.64142	In	38	0.00497808	0
106	Amidosulfuron	CN(S(=O)(=O)C)S(=O)(=O)NC(=O)NC1=NC(=CC(=N1)OC)OC	1	2	2	2	Moderate	3.64069	In	38	0.00445504	0
1562	Tetflupyrolimet	CN1C[C@@H]([C@H](C1=O)C(=O)NC2=CC=CC=C2F)C3=CC(=CC=C3)C(F)(F)F	1	2	2	2	Moderate	3.63708	In	38	0.00187358	0
730	Fenitropan	CC(=O)OCC(C(C1=CC=CC=C1)OC(=O)C)[N+](=O)[O-]	1	2	2	2	Moderate	3.63562	In	38	0.000834	0
883	Fomesafen	CS(=O)(=O)NC(=O)C1=C(C=CC(=C1)OC2=C(C=C(C=C2)C(F)(F)F)Cl)[N+](=O)[O-]	1	2	2	2	Moderate	3.63475	In	38	0.000214	0
1595	Thiophanate-methyl	COC(=O)NC(=S)NC1=CC=CC=C1NC(=S)NC(=O)OC	1	2	2	2	Moderate	3.63445	In	38	0	NaN
1569	Tetraniliprole	CC1=CC(=CC(=C1NC(=O)C2=CC(=NN2C3=C(C=CC=N3)Cl)CN4N=C(N=N4)C(F)(F)F)C(=O)NC)C#N	1	2	2	2	Moderate	3.63146	In	38	0.00213943	#NAME?
1170	Methyl (((1-(5-(2-chloro-4-(trifluoromethyl)phenoxy)-2-nitrophenyl)-2-methoxyethylidene)amino)oxy)acetate	COCC(=NOCC(=O)OC)c1cc(Oc2ccc(cc2Cl)C(F)(F)F)ccc1[N+](=O)[O-]	1	2	3	3	Good	3.62859	In	4	0.312391	0.328257
349	Chlorflurenol	C1=CC=C2C(=C1)C3=C(C2(C(=O)O)O)C=C(C=C3)Cl	1	2	2	2	Moderate	3.62667	In	38	0.0055574	#NAME?
1326	Picloram	C1(=C(C(=NC(=C1Cl)Cl)C(=O)O)Cl)N	1	2	2	2	Moderate	3.61929	In	38	0.0108254	#NAME?
1657	Trifloxysulfuron	COC1=CC(=NC(=N1)NC(=O)NS(=O)(=O)C2=C(C=CC=N2)OCC(F)(F)F)OC	1	2	2	2	Moderate	3.6181	In	38	0.0116764	#NAME?
235	Bromobonil	C1CC(OC1)COC(=O)OC2=C(C=C(C=C2Br)C#N)Br	1	2	3	3	Good	3.61707	In	38	0.309415	0
892	Fosamine	CCOP(=O)(C(=O)N)O	1	2	2	2	Moderate	3.61651	In	38	0.0128107	#NAME?
420	Cloxyfonac-sodium	C1=CC(=C(C=C1Cl)CO)OCC(=O)[O-]	1	2	2	2	Moderate	3.61627	In	38	0.0129819	#NAME?
659	Epocholeone	CC[C@H]([C@@H]1[C@H](O1)[C@@H](C)[C@H]2CC[C@@H]3[C@@]2(CC[C@H]4[C@H]3COC(=O)[C@@H]5[C@@]4(C[C@H]([C@H](C5)OC(=O)CC)OC(=O)CC)C)C)C(C)C	1	2	3	3	Good	3.61562	In	38	0.308832	0
1155	Methazole	CN1C(=O)N(OC1=O)C2=CC(=C(C=C2)Cl)Cl	1	2	2	2	Moderate	3.61422	In	38	0.014451	#NAME?
362	Chloropon	C(C(C(=O)O)(Cl)Cl)Cl	1	2	2	2	Moderate	3.61251	In	38	0.0156685	#NAME?
217	Bispyribac	COC1=CC(=NC(=N1)OC2=C(C(=CC=C2)OC3=NC(=CC(=N3)OC)OC)C(=O)O)OC	1	2	2	2	Moderate	3.61227	In	38	0.01584	#NAME?
1270	Oxadixyl	CC1=C(C(=CC=C1)C)N(C(=O)COC)N2CCOC2=O	1	2	3	3	Good	3.60732	In	38	0.30555	0
851	Flupoxam	C1=CC=C(C=C1)C2=NC(=NN2C3=CC(=C(C=C3)Cl)COCC(C(F)(F)F)(F)F)C(=O)N	1	2	3	3	Good	3.58006	In	38	0.295345	0
393	Cinosulfuron	COCCOC1=CC=CC=C1S(=O)(=O)NC(=O)NC2=NC(=NC(=N2)OC)OC	1	2	3	3	Good	3.4669	In	38	0.26435	0
522	Dicamba diglycolamine	COC1=C(C=CC(=C1C(=O)O)Cl)Cl.C(COCCO)N	1	2	2	2	Moderate	3.43277	In	38	0.259253	0

## Sheet: PPDB_M3
TestCompNo	Chemical name	SMILE	Score(MAE-LOO)	Score(Proximity Train YObs Mean)	Score(Similarity based AD)	CompositeScore	PredictionQuality	YPred(Test)	AD status	Closest Training Compound	Euclidean Distance	Generalized Jaccard Coeff.
1377	Propetamphos	CCNP(=S)(OC)OC(=CC(=O)OC(C)C)C	1	3	3	2	Moderate	6.15923	In	34	0.5	0.5
107	Amidothioate	CCNP(=S)(OC)OC1=C(C=C(C=C1)SC)Cl	1	3	3	2	Moderate	6.10486	In	23	0	1
761	Fensulfothion	CCOP(=S)(OCC)OC1=CC=C(C=C1)S(=O)C	1	3	3	2	Moderate	6.10486	In	23	0	1
764	Fenthion	CC1=C(C=CC(=C1)OP(=S)(OC)OC)SC	1	3	3	2	Moderate	6.10486	In	23	0	1
765	Fenthion sulfoxide	CC1=C(C=CC(=C1)OP(=S)(OC)OC)S(=O)C	1	3	3	2	Moderate	6.10486	In	23	0	1
766	Fenthion-ethyl	CCOP(=S)(OCC)OC1=CC(=C(C=C1)SC)C	1	3	3	2	Moderate	6.10486	In	23	0	1
1532	Sulprofos	CCCSP(=S)(OCC)OC1=CC=C(C=C1)SC	1	3	3	2	Moderate	6.10486	In	23	0	1
1551	Temephos	COP(=S)(OC)OC1=CC=C(C=C1)SC2=CC=C(C=C2)OP(=S)(OC)OC	1	3	3	2	Moderate	5.95832	In	23	0.0957826	0.928571
1430	Pyridafenthion	CCOP(=S)(OCC)OC1=NN(C(=O)C=C1)C2=CC=CC=C2	1	3	3	2	Moderate	5.81783	In	34	0.559017	0.4
1316	Phosametine	CN(C(=O)CNCP(=O)(O)O)S(=O)(=O)C	1	3	3	2	Moderate	5.55494	In	19	0.111111	0.857143
18	1,3-butadiene	C=CC=C	1	3	3	2	Moderate	5.46277	In	34	0	1
73	Acrinathrin	CC1(C(C1C(=O)OC(C#N)C2=CC(=CC=C2)OC3=CC=CC=C3)C=CC(=O)OC(C(F)(F)F)C(F)(F)F)C	1	3	3	2	Moderate	5.46277	In	34	0	1
85	Allethrin	CC1=C(C(=O)CC1OC(=O)C2C(C2(C)C)C=C(C)C)CC=C	1	3	3	2	Moderate	5.46277	In	34	0	1
86	Allidochlor	C=CCN(CC=C)C(=O)CCl	1	3	3	2	Moderate	5.46277	In	34	0	1
87	Alloxydim	CCCC(=C1C(=O)CC(C(C1=O)C(=O)OC)(C)C)NOCC=C	1	3	3	2	Moderate	5.46277	In	34	0	1
88	Alloxydim sodium	CCCC(=NOCC=C)C1=C(CC(C(C1=O)C(=O)OC)(C)C)[O-]	1	3	3	2	Moderate	5.46277	In	34	0	1
90	Allyxycarb	CC1=CC(=CC(=C1N(CC=C)CC=C)C)OC(=O)NC	1	3	3	2	Moderate	5.46277	In	34	0	1
91	Alorac	C(=C(C(=O)O)Cl)(C(=O)C(Cl)(Cl)Cl)Cl	1	3	3	2	Moderate	5.46277	In	34	0	1
94	Alpha-endosulfan	C1C2C(COS(=O)O1)C3(C(=C(C2(C3(Cl)Cl)Cl)Cl)Cl)Cl	1	3	3	2	Moderate	5.46277	In	34	0	1
188	Benzfendizone	CCC1=CC(=C(C=C1)COC2=CC=C(C=C2)N3C(=O)C=C(N(C3=O)C)C(F)(F)F)OC(C)C(=O)OC	1	3	3	2	Moderate	5.46277	In	34	0	1
202	Beta-endosulfan	C1C2C(COS(=O)O1)C3(C(=C(C2(C3(Cl)Cl)Cl)Cl)Cl)Cl	1	3	3	2	Moderate	5.46277	In	34	0	1
207	Bifenthrin	CC1=C(C=CC=C1COC(=O)C2C(C2(C)C)C=C(C(F)(F)F)Cl)C3=CC=CC=C3	1	3	3	2	Moderate	5.46277	In	34	0	1
209	Bioallethrin	CC1=C(C(=O)CC1OC(=O)C2C(C2(C)C)C=C(C)C)CC=C	1	3	3	2	Moderate	5.46277	In	34	0	1
230	Bromacil	CCC(C)N1C(=O)C(=C(NC1=O)C)Br	1	3	3	2	Moderate	5.46277	In	34	0	1
231	Bromacil-dimethylammonium	CCC(C)N1C(=O)NC(C)=C(Br)C1=O	1	3	3	2	Moderate	5.46277	In	34	0	1
237	Bromocyclen	C1C(C2(C(=C(C1(C2(Cl)Cl)Cl)Cl)Cl)Cl)CBr	1	3	3	2	Moderate	5.46277	In	34	0	1
247	Brompyrazon	C1=CC=C(C=C1)N2C(=O)C(=C(C=N2)N)Br	1	3	3	2	Moderate	5.46277	In	34	0	1
263	Butenachlor	CCC1=C(C(=CC=C1)CC)N(COCC=CC)C(=O)CCl	1	3	3	2	Moderate	5.46277	In	34	0	1
269	Butopyronoxyl	CCCCOC(=O)C1=CC(=O)CC(O1)(C)C	1	3	3	2	Moderate	5.46277	In	34	0	1
289	Captafol	C1C=CCC2C1C(=O)N(C2=O)SC(C(Cl)Cl)(Cl)Cl	1	3	3	2	Moderate	5.46277	In	34	0	1
290	Captan	C1C=CCC2C1C(=O)N(C2=O)SC(Cl)(Cl)Cl	1	3	3	2	Moderate	5.46277	In	34	0	1
304	Carboxin	CC1=C(SCCO1)C(=O)NC2=CC=CC=C2	1	3	3	2	Moderate	5.46277	In	34	0	1
326	Chlorbicyclen	C(C1C(C2(C(=C(C1(C2(Cl)Cl)Cl)Cl)Cl)Cl)CCl)Cl	1	3	3	2	Moderate	5.46277	In	34	0	1
329	Chlordane	C1C2C(C(C1Cl)Cl)C3(C(=C(C2(C3(Cl)Cl)Cl)Cl)Cl)Cl	1	3	3	2	Moderate	5.46277	In	34	0	1
351	Chloridazon	C1=CC=C(C=C1)N2C(=O)C(=C(C=N2)N)Cl	1	3	3	2	Moderate	5.46277	In	34	0	1
388	Cholecalciferol	CC(C)CCCC(C)C1CCC2C1(CCCC2=CC=C3CC(CCC3=C)O)C	1	3	3	2	Moderate	5.46277	In	34	0	1
391	Cinidon-ethyl	CCOC(=O)C(=CC1=C(C=CC(=C1)N2C(=O)C3=C(C2=O)CCCC3)Cl)Cl	1	3	3	2	Moderate	5.46277	In	34	0	1
398	Clethodim	CCC(=C1C(=O)CC(CC1=O)CC(C)SCC)NOCC=CCl	1	3	3	2	Moderate	5.46277	In	34	0	1
413	Cloproxydim	CCCC(=C1C(=O)CC(CC1=O)CC(C)SCC)NOCC=CCl	1	3	3	2	Moderate	5.46277	In	34	0	1
421	Copper abietate	CC(C)C1=CC2=CCC3C(C)(CCCC3(C)C([O-])=O)C2CC1	1	3	3	2	Moderate	5.46277	In	34	0	1
438	Crotamiton	CCN(C1=CC=CC=C1C)C(=O)C=CC	1	3	3	2	Moderate	5.46277	In	34	0	1
468	Cyhalothrin	CC1(C(C1C(=O)OC(C#N)C2=CC(=CC=C2)OC3=CC=CC=C3)C=C(C(F)(F)F)Cl)C	1	3	3	2	Moderate	5.46277	In	34	0	1
511	Di-1-p-menthene	C(CC(C)(C)C1CCC(C)=CC1)C1CCC(C)=CC1	1	3	3	2	Moderate	5.46277	In	34	0	1
529	Dichlone	C1=CC=C2C(=C1)C(=O)C(=C(C2=O)Cl)Cl	1	3	3	2	Moderate	5.46277	In	34	0	1
530	Dichlormid	C=CCN(CC=C)C(=O)C(Cl)Cl	1	3	3	2	Moderate	5.46277	In	34	0	1
549	Diclomezine	CC1=C(C=C(C=C1Cl)C2=NNC(=O)C=C2)Cl	1	3	3	2	Moderate	5.46277	In	34	0	1
555	Dicoumarol	C1=CC=C2C(=C1)C(=C(C(=O)O2)CC3=C(C4=CC=CC=C4OC3=O)O)O	1	3	3	2	Moderate	5.46277	In	34	0	1
556	Dicrotophos	CC(=CC(=O)N(C)C)OP(=O)(OC)OC	1	3	3	2	Moderate	5.46277	In	34	0	1
560	Dieldrin	C1C2C3C(C1C4C2O4)C5(C(=C(C3(C5(Cl)Cl)Cl)Cl)Cl)Cl	1	3	3	2	Moderate	5.46277	In	34	0	1
568	Difenopenten	CC(C=CC(=O)O)OC1=CC=C(C=C1)OC2=CC=C(C=C2)C(F)(F)F	1	3	3	2	Moderate	5.46277	In	34	0	1
569	Difenopenten-ethyl	CCOC(=O)C=CC(C)OC1=CC=C(C=C1)OC2=CC=C(C=C2)C(F)(F)F	1	3	3	2	Moderate	5.46277	In	34	0	1
588	Dimethipin	CC1=C(S(=O)(=O)CCS1(=O)=O)C	1	3	3	2	Moderate	5.46277	In	34	0	1
598	Dimidazon	COC1=C(C(=O)N(N=C1)C2=CC=CC=C2)OC	1	3	3	2	Moderate	5.46277	In	34	0	1
602	Diniconazole	CC(C)(C)C(C(=CC1=C(C=C(C=C1)Cl)Cl)N2C=NC=N2)O	1	3	3	2	Moderate	5.46277	In	34	0	1
603	Diniconazole-M	CC(C)(C)C(C(=CC1=C(C=C(C=C1)Cl)Cl)N2C=NC=N2)O	1	3	3	2	Moderate	5.46277	In	34	0	1
606	Dinocap	CCCCCCC(C)C1=CC(=CC(=C1OC(=O)C=CC)[N+](=O)[O-])[N+](=O)[O-]	1	3	3	2	Moderate	5.46277	In	34	0	1
650	Empenthrin	CCC=C(C)C(C#C)OC(=O)C1C(C1(C)C)C=C(C)C	1	3	3	2	Moderate	5.46277	In	34	0	1
651	Endosulfan	C1C2C(COS(=O)O1)C3(C(=C(C2(C3(Cl)Cl)Cl)Cl)Cl)Cl	1	3	3	2	Moderate	5.46277	In	34	0	1
654	Endrin	C1C2C3C(C1C4C2O4)C5(C(=C(C3(C5(Cl)Cl)Cl)Cl)Cl)Cl	1	3	3	2	Moderate	5.46277	In	34	0	1
655	Enoxastrobin	CC(=NOCC1=CC=CC=C1C(=COC)C(=O)OC)C=CC2=CC=C(C=C2)Cl	1	3	3	2	Moderate	5.46277	In	34	0	1
662	Epsilon-metofluthrin	C/C=C\[C@@H]1[C@H](C1(C)C)C(=O)OCC2=C(C(=C(C(=C2F)F)COC)F)F	1	3	3	2	Moderate	5.46277	In	34	0	1
664	Epyrifenacil	CCOC(=O)COC1=C(C=CC=N1)OC2=C(C=C(C(=C2)N3C(=O)C=C(N(C3=O)C)C(F)(F)F)F)Cl	1	3	3	2	Moderate	5.46277	In	34	0	1
713	Fenaminstrobin	CC(=NOCC1=CC=CC=C1C(=NOC)C(=O)NC)C=CC2=C(C=CC=C2Cl)Cl	1	3	3	2	Moderate	5.46277	In	34	0	1
758	Fenridazon	CC1=CC(=O)C(=NN1C2=CC=C(C=C2)Cl)C(=O)O	1	3	3	2	Moderate	5.46277	In	34	0	1
759	Fenridazon-propyl	CCCOC(=O)C1=NN(C(=CC1=O)C)C2=CC=C(C=C2)Cl	1	3	3	2	Moderate	5.46277	In	34	0	1
842	Fluoroimide	C1=CC(=CC=C1N2C(=O)C(=C(C2=O)Cl)Cl)F	1	3	3	2	Moderate	5.46277	In	34	0	1
852	Flupropacil	CC(C)OC(=O)C1=C(C=CC(=C1)N2C(=O)C=C(N(C2=O)C)C(F)(F)F)Cl	1	3	3	2	Moderate	5.46277	In	34	0	1
857	Flupyradifurone	C1C(=CC(=O)O1)N(CC2=CN=C(C=C2)Cl)CC(F)F	1	3	3	2	Moderate	5.46277	In	34	0	1
900	Fumaric acid	C(=CC(=O)O)C(=O)O	1	3	3	2	Moderate	5.46277	In	34	0	1
913	Gamma-cyhalothrin	CC1(C(C1C(=O)OC(C#N)C2=CC(=CC=C2)OC3=CC=CC=C3)C=C(C(F)(F)F)Cl)C	1	3	3	2	Moderate	5.46277	In	34	0	1
927	Griseofulvin	CC1CC(=O)C=C(C12C(=O)C3=C(O2)C(=C(C=C3OC)OC)Cl)OC	1	3	3	2	Moderate	5.46277	In	34	0	1
938	Haloxydine	C1(=C(NC(=C(C1=O)Cl)F)F)Cl	1	3	3	2	Moderate	5.46277	In	34	0	1
945	Heptafluthrin	CC1(C(C1C(=O)OCC2=C(C(=C(C(=C2F)F)COC)F)F)C=CC(F)(F)F)C	1	3	3	2	Moderate	5.46277	In	34	0	1
964	Hymexazol	CC1=CC(=O)NO1	1	3	3	2	Moderate	5.46277	In	34	0	1
1018	Isobenzan	C12C(C(OC1Cl)Cl)C3(C(=C(C2(C3(Cl)Cl)Cl)Cl)Cl)Cl	1	3	3	2	Moderate	5.46277	In	34	0	1
1022	Isocil	CC1=C(C(=O)N(C(=O)N1)C(C)C)Br	1	3	3	2	Moderate	5.46277	In	34	0	1
1057	Kappa-bifenthrin	CC1=C(C=CC=C1COC(=O)C2C(C2(C)C)C=C(C(F)(F)F)Cl)C3=CC=CC=C3	1	3	3	2	Moderate	5.46277	In	34	0	1
1058	Kappa-tefluthrin	CC1=C(C(=C(C(=C1F)F)COC(=O)C2C(C2(C)C)C=C(C(F)(F)F)Cl)F)F	1	3	3	2	Moderate	5.46277	In	34	0	1
1065	Lambda-cyhalothrin	CC1(C(C1C(=O)OC(C#N)C2=CC(=CC=C2)OC3=CC=CC=C3)C=C(C(F)(F)F)Cl)C	1	3	3	2	Moderate	5.46277	In	34	0	1
1068	Lavandulyl senecioate	CC(=CC[C@H](COC(=O)C=C(C)C)C(=C)C)C	1	3	3	2	Moderate	5.46277	In	34	0	1
1080	Maleic hydrazide	C1=CC(=O)NNC1=O	1	3	3	2	Moderate	5.46277	In	34	0	1
1081	Maleic hydrazide choline	C[N+](C)(C)CCO.C1=CC(=NNC1=O)[O-]	1	3	3	2	Moderate	5.46277	In	34	0	1
1082	Maleic hydrazide potassium	C1=CC(=O)NNC1=O	1	3	3	2	Moderate	5.46277	In	34	0	1
1083	Maleic hydrazide sodium	C(=CC(=O)[O-])C(=O)NN	1	3	3	2	Moderate	5.46277	In	34	0	1
1132	Meptyldinocap	CCCCCCC(C)C1=CC(=CC(=C1OC(=O)C=CC)[N+](=O)[O-])[N+](=O)[O-]	1	3	3	2	Moderate	5.46277	In	34	0	1
1163	Methocrotophos	CC(=CC(=O)N(C)OC)OP(=O)(OC)OC	1	3	3	2	Moderate	5.46277	In	34	0	1
1185	Metofluthrin	CC=CC1C(C1(C)C)C(=O)OCC2=C(C(=C(C(=C2F)F)COC)F)F	1	3	3	2	Moderate	5.46277	In	34	0	1
1198	Mevinphos	CC(=CC(=O)OC)OP(=O)(OC)OC	1	3	3	2	Moderate	5.46277	In	34	0	1
1207	Monocrotophos	C/C(=C\C(=O)NC)/OP(=O)(OC)OC	1	3	3	2	Moderate	5.46277	In	34	0	1
1223	N1,N2-diallyl-N2-dichloroacetylglycinamide	C=CCNC(=O)CN(CC=C)C(=O)C(Cl)Cl	1	3	3	2	Moderate	5.46277	In	34	0	1
1250	Norflurazon	CNC1=C(C(=O)N(N=C1)C2=CC=CC(=C2)C(F)(F)F)Cl	1	3	3	2	Moderate	5.46277	In	34	0	1
1272	Oxapyrazon	C1=CC=C(C=C1)N2C(=O)C(=C(C=N2)NC(=O)C(=O)O)Br	1	3	3	2	Moderate	5.46277	In	34	0	1
1280	Oxycarboxin	CC1=C(S(=O)(=O)CCO1)C(=O)NC2=CC=CC=C2	1	3	3	2	Moderate	5.46277	In	34	0	1
1321	Phosphamidon	CCN(CC)C(=O)C(=C(C)OP(=O)(OC)OC)Cl	1	3	3	2	Moderate	5.46277	In	34	0	1
1359	Profluthrin	CC=CC1C(C1(C)C)C(=O)OCC2=C(C(=C(C(=C2F)F)C)F)F	1	3	3	2	Moderate	5.46277	In	34	0	1
1428	Pyridaben	CC(C)(C)C1=CC=C(C=C1)CSC2=C(C(=O)N(N=C2)C(C)(C)C)Cl	1	3	3	2	Moderate	5.46277	In	34	0	1
1458	Quinoclamine	C1=CC=C2C(=C1)C(=O)C(=C(C2=O)Cl)N	1	3	3	2	Moderate	5.46277	In	34	0	1
1460	Quinonamid	C1=CC=C2C(=C1)C(=O)C(=C(C2=O)Cl)NC(=O)C(Cl)Cl	1	3	3	2	Moderate	5.46277	In	34	0	1
1472	Saflufenacil	CC(C)N(C)S(=O)(=O)NC(=O)C1=CC(=C(C=C1Cl)F)N2C(=O)C=C(N(C2=O)C)C(F)(F)F	1	3	3	2	Moderate	5.46277	In	34	0	1
1474	S-bioallethrin	CC1=C(C(=O)CC1OC(=O)C2C(C2(C)C)C=C(C)C)CC=C	1	3	3	2	Moderate	5.46277	In	34	0	1
1548	Tefluthrin	CC1=C(C(=C(C(=C1F)F)COC(=O)C2C(C2(C)C)C=C(C(F)(F)F)Cl)F)F	1	3	3	2	Moderate	5.46277	In	34	0	1
1552	Tepraloxydim	CCC(=C1C(=O)CC(CC1=O)C2CCOCC2)NOCC=CCl	1	3	3	2	Moderate	5.46277	In	34	0	1
1554	Terbacil	CC1=C(C(=O)N(C(=O)N1)C(C)(C)C)Cl	1	3	3	2	Moderate	5.46277	In	34	0	1
1601	Tiafenacil	CC(C(=O)NCCC(=O)OC)SC1=C(C=C(C(=C1)N2C(=O)C=C(N(C2=O)C)C(F)(F)F)F)Cl	1	3	3	2	Moderate	5.46277	In	34	0	1
1630	Triapenthenol	CC(C)(C)C(C(=CC1CCCCC1)N2C=NC=N2)O	1	3	3	2	Moderate	5.46277	In	34	0	1
1678	Uniconazole	CC(C)(C)C(C(=CC1=CC=C(C=C1)Cl)N2C=NC=N2)O	1	3	3	2	Moderate	5.46277	In	34	0	1
714	Fenamiphos	CCOP(=O)(NC(C)C)OC1=CC(=C(C=C1)SC)C	1	3	3	2	Moderate	5.40839	In	19	0	1
1373	Propaphos	CCCOP(=O)(OCCC)OC1=CC=C(C=C1)SC	1	3	3	2	Moderate	5.40839	In	19	0	1
59	Acephate	CC(=O)NP(=O)(OC)SC	1	3	3	2	Moderate	4.96284	In	21	0	1
65	Acetophos	CCOC(=O)CSP(=O)(OCC)OCC	1	3	3	2	Moderate	4.96284	In	21	0	1
117	Amiton	CCN(CC)CCSP(=O)(OCC)OCC	1	3	3	2	Moderate	4.96284	In	21	0	1
118	Amiton oxalate	CCN(CC)CCSP(=O)(OCC)OCC.C(=O)(C(=O)O)O	1	3	3	2	Moderate	4.96284	In	21	0	1
134	Aspon	CCCOP(=S)(OCCC)OP(=S)(OCCC)OCCC	1	3	3	2	Moderate	4.96284	In	21	0	1
142	Azamethiphos	COP(=O)(OC)SCN1C2=NC=C(C=C2OC1=O)Cl	1	3	3	2	Moderate	4.96284	In	21	0	1
151	Azothoate	COP(=S)(OC)OC1=CC=C(C=C1)N=NC2=CC=C(C=C2)Cl	1	3	3	2	Moderate	4.96284	In	21	0	1
240	Bromophos	COP(=S)(OC)OC1=CC(=C(C=C1Cl)Br)Cl	1	3	3	2	Moderate	4.96284	In	21	0	1
241	Bromophos-ethyl	CCOP(=S)(OCC)OC1=CC(=C(C=C1Cl)Br)Cl	1	3	3	2	Moderate	4.96284	In	21	0	1
277	Cadusafos	CCC(C)SP(=O)(OCC)SC(C)CC	1	3	3	2	Moderate	4.96284	In	21	0	1
301	Carbophenothion	CCOP(=S)(OCC)SCSC1=CC=C(C=C1)Cl	1	3	3	2	Moderate	4.96284	In	21	0	1
334	Chlorethoxyfos	CCOP(=S)(OCC)OC(C(Cl)(Cl)Cl)Cl	1	3	3	2	Moderate	4.96284	In	21	0	1
355	Chlormephos	CCOP(=S)(OCC)SCCl	1	3	3	2	Moderate	4.96284	In	21	0	1
373	Chlorphoxim	CCOP(=S)(OCC)ON=C(C#N)C1=CC=CC=C1Cl	1	3	3	2	Moderate	4.96284	In	21	0	1
377	Chlorpyrifos	CCOP(=S)(OCC)OC1=NC(=C(C=C1Cl)Cl)Cl	1	3	3	2	Moderate	4.96284	In	21	0	1
378	Chlorpyrifos-methyl	COP(=S)(OC)OC1=NC(=C(C=C1Cl)Cl)Cl	1	3	3	2	Moderate	4.96284	In	21	0	1
385	Chlorthion	COP(=S)(OC)OC1=CC(=C(C=C1)[N+](=O)[O-])Cl	1	3	3	2	Moderate	4.96284	In	21	0	1
386	Chlorthiophos	CCOP(=S)(OCC)OC1=CC(=C(C=C1Cl)Cl)SC	1	3	3	2	Moderate	4.96284	In	21	0	1
434	Coumithoate	CCOP(=S)(OCC)OC1=CC2=C(C=C1)C3=C(CCCC3)C(=O)O2	1	3	3	2	Moderate	4.96284	In	21	0	1
443	Cyanophos	COP(=S)(OC)OC1=CC=C(C=C1)C#N	1	3	3	2	Moderate	4.96284	In	21	0	1
444	Cyanthoate	CCOP(=O)(OCC)SCC(=O)NC(C)(C)C#N	1	3	3	2	Moderate	4.96284	In	21	0	1
513	Dialifos	CCOP(=S)(OCC)SC(CCl)N1C(=O)C2=CC=CC=C2C1=O	1	3	3	2	Moderate	4.96284	In	21	0	1
518	Diazinon	CCOP(=S)(OCC)OC1=NC(=NC(=C1)C)C(C)C	1	3	3	2	Moderate	4.96284	In	21	0	1
527	Dichlofenthion	CCOP(=S)(OCC)OC1=C(C=C(C=C1)Cl)Cl	1	3	3	2	Moderate	4.96284	In	21	0	1
564	Dietholate	CCOP(=S)(OCC)OC1=CC=CC=C1	1	3	3	2	Moderate	4.96284	In	21	0	1
617	Dioxabenzophos	COP1(=S)OCC2=CC=CC=C2O1	1	3	3	2	Moderate	4.96284	In	21	0	1
635	Ditalimfos	CCOP(=S)(N1C(=O)C2=CC=CC=C2C1=O)OCC	1	3	3	2	Moderate	4.96284	In	21	0	1
647	Edifenphos	CCOP(=O)(SC1=CC=CC=C1)SC2=CC=CC=C2	1	3	3	2	Moderate	4.96284	In	21	0	1
656	EPBP	S=P(OC1=CC=C(Cl)C=C1Cl)(OCC)C=2C=CC=CC2	1	3	3	2	Moderate	4.96284	In	21	0	1
658	EPN	CCOP(=S)(C1=CC=CC=C1)OC2=CC=C(C=C2)[N+](=O)[O-]	1	3	3	2	Moderate	4.96284	In	21	0	1
670	Etaphos	CCCSP(=O)(OCC)OC1=C(C=C(C=C1)Cl)Cl	1	3	3	2	Moderate	4.96284	In	21	0	1
682	Ethion	CCOP(=S)(OCC)SCSP(=S)(OCC)OCC	1	3	3	2	Moderate	4.96284	In	21	0	1
689	Ethoprophos	CCCSP(=O)(OCC)SCCC	1	3	3	2	Moderate	4.96284	In	21	0	1
709	Etrimfos	CCC1=NC(=CC(=N1)OP(=S)(OC)OC)OCC	1	3	3	2	Moderate	4.96284	In	21	0	1
724	Fenchlorphos	COP(=S)(OC)OC1=CC(=C(C=C1Cl)Cl)Cl	1	3	3	2	Moderate	4.96284	In	21	0	1
731	Fenitrothion	CC1=C(C=CC(=C1)OP(=S)(OC)OC)[N+](=O)[O-]	1	3	3	2	Moderate	4.96284	In	21	0	1
884	Fonofos	CCOP(=S)(CC)SC1=CC=CC=C1	1	3	3	2	Moderate	4.96284	In	21	0	1
894	Fosmethilan	CCCC(=O)N(CSP(=S)(OC)OC)C1=CC=CC=C1Cl	1	3	3	2	Moderate	4.96284	In	21	0	1
896	Fosthiazate	CCC(C)SP(=O)(N1CCSC1=O)OCC	1	3	3	2	Moderate	4.96284	In	21	0	1
948	Heterophos	CCCSP(=O)(OCC)OC1=CC=CC=C1	1	3	3	2	Moderate	4.96284	In	21	0	1
958	Hexylthiofos	CCOP(=O)(OC1CCCCC1)SCC	1	3	3	2	Moderate	4.96284	In	21	0	1
984	Imicyafos	CCCSP(=O)(N1CCN(C1=NC#N)CC)OCC	1	3	3	2	Moderate	4.96284	In	21	0	1
996	Inezin	CCOP(=O)(C1=CC=CC=C1)SCC2=CC=CC=C2	1	3	3	2	Moderate	4.96284	In	21	0	1
999	Iodofenphos	COP(=S)(OC)OC1=CC(=C(C=C1Cl)I)Cl	1	3	3	2	Moderate	4.96284	In	21	0	1
1012	Iprobenfos	CC(C)OP(=O)(OC(C)C)SCC1=CC=CC=C1	1	3	3	2	Moderate	4.96284	In	21	0	1
1016	Isamidofos	CCOP(=O)(NC(C)C)SCC(=O)N(C)C1=CC=CC=C1	1	3	3	2	Moderate	4.96284	In	21	0	1
1021	Isocarbophos	CC(C)OC(=O)C1=CC=CC=C1OP(=S)(N)OC	1	3	3	2	Moderate	4.96284	In	21	0	1
1025	Isofenphos	CCOP(=S)(NC(C)C)OC1=CC=CC=C1C(=O)OC(C)C	1	3	3	2	Moderate	4.96284	In	21	0	1
1026	Isofenphos-methyl	CC(C)NP(=S)(OC)OC1=CC=CC=C1C(=O)OC(C)C	1	3	3	2	Moderate	4.96284	In	21	0	1
1054	Jiajizengxiaolin	COP(=S)(OC)OC1=CC=CC=C1	1	3	3	2	Moderate	4.96284	In	21	0	1
1071	Leptophos	COP(=S)(C1=CC=CC=C1)OC2=CC(=C(C=C2Cl)Br)Cl	1	3	3	2	Moderate	4.96284	In	21	0	1
1133	Merphos	CCCCSP(SCCCC)SCCCC	1	3	3	2	Moderate	4.96284	In	21	0	1
1152	Methacrifos	CC(=COP(=S)(OC)OC)C(=O)OC	1	3	3	2	Moderate	4.96284	In	21	0	1
1153	Methamidophos	COP(=O)(N)SC	1	3	3	2	Moderate	4.96284	In	21	0	1
1160	Methiotepa	CC1CN1P(=S)(N2CC2C)N3CC3C	1	3	3	2	Moderate	4.96284	In	21	0	1
1175	Methylacetophos	CCOC(=O)CSP(=O)(OC)OC	1	3	3	2	Moderate	4.96284	In	21	0	1
1262	Omethoate	CNC(=O)CSP(=O)(OC)OC	1	3	3	2	Moderate	4.96284	In	21	0	1
1286	Parathion-ethyl	CCOP(=S)(OCC)OC1=CC=C(C=C1)[N+](=O)[O-]	1	3	3	2	Moderate	4.96284	In	21	0	1
1287	Parathion-methyl	COP(=S)(OC)OC1=CC=C(C=C1)[N+](=O)[O-]	1	3	3	2	Moderate	4.96284	In	21	0	1
1306	Phenkapton	CCOP(=S)(OCC)SCSC1=C(C=CC(=C1)Cl)Cl	1	3	3	2	Moderate	4.96284	In	21	0	1
1313	Phorate	CCOP(=S)(OCC)SCSCC	1	3	3	2	Moderate	4.96284	In	21	0	1
1314	Phosacetim	CC(=NP(=S)(OC1=CC=C(C=C1)Cl)OC2=CC=C(C=C2)Cl)N	1	3	3	2	Moderate	4.96284	In	21	0	1
1315	Phosalone	CCOP(=S)(OCC)SCN1C2=C(C=C(C=C2)Cl)OC1=O	1	3	3	2	Moderate	4.96284	In	21	0	1
1319	Phosmet	COP(=S)(OC)SCN1C(=O)C2=CC=CC=C2C1=O	1	3	3	2	Moderate	4.96284	In	21	0	1
1320	Phosnichlor	COP(=S)(OC)OC1=CC(=C(C=C1)Cl)[N+](=O)[O-]	1	3	3	2	Moderate	4.96284	In	21	0	1
1323	Phoxim	CCOP(=S)(OCC)ON=C(C#N)C1=CC=CC=C1	1	3	3	2	Moderate	4.96284	In	21	0	1
1341	Pirimiphos-ethyl	CCN(CC)C1=NC(=CC(=N1)OP(=S)(OCC)OCC)C	1	3	3	2	Moderate	4.96284	In	21	0	1
1342	Pirimiphos-methyl	CCN(CC)C1=NC(=CC(=N1)OP(=S)(OC)OC)C	1	3	3	2	Moderate	4.96284	In	21	0	1
1356	Profenofos	CCCSP(=O)(OCC)OC1=C(C=C(C=C1)Br)Cl	1	3	3	2	Moderate	4.96284	In	21	0	1
1395	Prothiofos	CCCSP(=S)(OCC)OC1=C(C=C(C=C1)Cl)Cl	1	3	3	2	Moderate	4.96284	In	21	0	1
1461	Quinothion	CCOP(=S)(OCC)OC1=CC(=NC2=CC=CC=C21)C	1	3	3	2	Moderate	4.96284	In	21	0	1
1527	Sulfotep	CCOP(=S)(OCC)OP(=S)(OCC)OCC	1	3	3	2	Moderate	4.96284	In	21	0	1
1557	Terbufos	CCOP(=S)(OCC)SCSC(C)(C)C	1	3	3	2	Moderate	4.96284	In	21	0	1
1609	Tolclofos-methyl	CC1=CC(=C(C(=C1)Cl)OP(=S)(OC)OC)Cl	1	3	3	2	Moderate	4.96284	In	21	0	1
1610	Tolfenpyrad	CC1=CC(=C(C(=C1)Cl)OP(=S)(OC)OC)Cl	1	3	3	2	Moderate	4.96284	In	21	0	1
1640	Tribufos	CCCCSP(=O)(SCCCC)SCCCC	1	3	3	2	Moderate	4.96284	In	21	0	1
1645	Trichloronate	CCOP(=S)(CC)OC1=CC(=C(C=C1Cl)Cl)Cl	1	3	3	2	Moderate	4.96284	In	21	0	1
1655	Trifenofos	CCCSP(=O)(OCC)OC1=C(C=C(C=C1Cl)Cl)Cl	1	3	3	2	Moderate	4.96284	In	21	0	1
2	(E)-2-(2-(2-(2,3-dichlorophenylamino)-6-trifluoromethylpyrimidin-4-yloxymethyl)phenyl)-3-methoxyacrylate	C\C=C(\C([O-])=O)C1=C(COC2=CC(=NC(NC3=C(Cl)C(Cl)=CC=C3)=N2)C(F)(F)F)C=CC=C1	1	3	3	2	Moderate	4.86457	In	6	0	1
19	1,3-dichloropropene	C=CC(Cl)Cl	1	3	3	2	Moderate	4.86457	In	6	0	1
25	1-methylcyclopropene	CC1=CC1	1	3	3	2	Moderate	4.86457	In	6	0	1
45	2-allyphenol	C=CCC1=CC=CC=C1O	1	3	3	2	Moderate	4.86457	In	6	0	1
60	Acequinocyl	CCCCCCCCCCCCC1=C(C(=O)C2=CC=CC=C2C1=O)OC(=O)C	1	3	3	2	Moderate	4.86457	In	6	0	1
74	Acrolein	C=CC=O	1	3	3	2	Moderate	4.86457	In	6	0	1
75	Acrylonitrile	C=CC#N	1	3	3	2	Moderate	4.86457	In	6	0	1
89	Allyl alcohol	C=CCO	1	3	3	2	Moderate	4.86457	In	6	0	1
93	Alpha-cypermethrin	CC1(C(C1C(=O)OC(C#N)C2=CC(=CC=C2)OC3=CC=CC=C3)C=C(Cl)Cl)C	1	3	3	2	Moderate	4.86457	In	6	0	1
190	Benzobicyclon	CS(=O)(=O)C1=CC(=C(C=C1)C(=O)C2=C(C3CCC(C3)C2=O)SC4=CC=CC=C4)Cl	1	3	3	2	Moderate	4.86457	In	6	0	1
200	Beta-cyfluthrin	CC1(C(C1C(=O)OC(C#N)C2=CC(=C(C=C2)F)OC3=CC=CC=C3)C=C(Cl)Cl)C	1	3	3	2	Moderate	4.86457	In	6	0	1
201	Beta-cypermethrin	CC1(C(C1C(=O)OC(C#N)C2=CC(=CC=C2)OC3=CC=CC=C3)C=C(Cl)Cl)C	1	3	3	2	Moderate	4.86457	In	6	0	1
204	Bicyclopyrone	COCCOCC1=C(C=CC(=N1)C(F)(F)F)C(=C2C(=O)C3CCC(C3)C2=O)O	1	3	3	2	Moderate	4.86457	In	6	0	1
208	Binapacryl	CCC(C)C1=CC(=CC(=C1OC(=O)C=C(C)C)[N+](=O)[O-])[N+](=O)[O-]	1	3	3	2	Moderate	4.86457	In	6	0	1
210	Biopermethrin	CC1(C(C1C(=O)OCC2=CC(=CC=C2)OC3=CC=CC=C3)C=C(Cl)Cl)C	1	3	3	2	Moderate	4.86457	In	6	0	1
211	Bioresmethrin	CC(=CC1C(C1(C)C)C(=O)OCC2=COC(=C2)CC3=CC=CC=C3)C	1	3	3	2	Moderate	4.86457	In	6	0	1
227	Brodifacoum	C1C(CC2=CC=CC=C2C1C3=C(C4=CC=CC=C4OC3=O)O)C5=CC=C(C=C5)C6=CC=C(C=C6)Br	1	3	3	2	Moderate	4.86457	In	6	0	1
232	Bromadiolone	C1=CC=C(C=C1)C(CC(C2=CC=C(C=C2)C3=CC=C(C=C3)Br)O)C4=C(C5=CC=CC=C5OC4=O)O	1	3	3	2	Moderate	4.86457	In	6	0	1
234	Bromfenvinfos	CCOP(=O)(OCC)OC(=CBr)C1=C(C=C(C=C1)Cl)Cl	1	3	3	2	Moderate	4.86457	In	6	0	1
251	Brucine	COC1=C(C=C2C(=C1)C34CCN5C3CC6C7C4N2C(=O)CC7OCC=C6C5)OC	1	3	3	2	Moderate	4.86457	In	6	0	1
272	Butroxydim	CCCC(=O)C1=C(C(=C(C=C1C)C)C2CC(=O)C(=C(CC)NOCC)C(=O)C2)C	1	3	3	2	Moderate	4.86457	In	6	0	1
344	Chlorfenvinphos	CCOP(=O)(OCC)OC(=CCl)C1=C(C=C(C=C1)Cl)Cl	1	3	3	2	Moderate	4.86457	In	6	0	1
363	Chloroprallethrin	CC1=C(C(=O)CC1OC(=O)C2C(C2(C)C)C=C(Cl)Cl)CC#C	1	3	3	2	Moderate	4.86457	In	6	0	1
396	Cis-permethrin	CC1(C(C1C(=O)OCC2=CC(=CC=C2)OC3=CC=CC=C3)C=C(Cl)Cl)C	1	3	3	2	Moderate	4.86457	In	6	0	1
404	Clofencet	CCC1=C(C(=O)C=NN1C2=CC=C(C=C2)Cl)C(=O)O	1	3	3	2	Moderate	4.86457	In	6	0	1
405	Clofencet potassium	CCC1=C(C(=O)C=NN1C2=CC=C(C=C2)Cl)C(=O)[O-]	1	3	3	2	Moderate	4.86457	In	6	0	1
429	Coumachlor	CC(=O)CC(C1=CC=C(C=C1)Cl)C2=C(C3=CC=CC=C3OC2=O)O	1	3	3	2	Moderate	4.86457	In	6	0	1
430	Coumafuryl	CC(=O)CC(C1=CC=CO1)C2=C(C3=CC=CC=C3OC2=O)O	1	3	3	2	Moderate	4.86457	In	6	0	1
431	Coumafuryl sodium	CC(=O)CC(C1=CC=CO1)C2=C(C3=CC=CC=C3OC2=O)[O-]	1	3	3	2	Moderate	4.86457	In	6	0	1
432	Coumatetralyl	C1CC(C2=CC=CC=C2C1)C3=C(C4=CC=CC=C4OC3=O)O	1	3	3	2	Moderate	4.86457	In	6	0	1
458	Cycloxaprid	C1CC2N3CCN(C3=C(C1O2)[N+](=O)[O-])CC4=CN=C(C=C4)Cl	1	3	3	2	Moderate	4.86457	In	6	0	1
459	Cycloxydim	CCCC(=C1C(=O)CC(CC1=O)C2CCCSC2)NOCC	1	3	3	2	Moderate	4.86457	In	6	0	1
461	Cyenopyrafen	CC1=C(N(N=C1C)C)C(=C(C#N)C2=CC=C(C=C2)C(C)(C)C)OC(=O)C(C)(C)C	1	3	3	2	Moderate	4.86457	In	6	0	1
464	Cyfluthrin	CC1(C(C1C(=O)OC(C#N)C2=CC(=C(C=C2)F)OC3=CC=CC=C3)C=C(Cl)Cl)C	1	3	3	2	Moderate	4.86457	In	6	0	1
474	Cypermethrin	CC1(C(C1C(=O)OC(C#N)C2=CC(=CC=C2)OC3=CC=CC=C3)C=C(Cl)Cl)C	1	3	3	2	Moderate	4.86457	In	6	0	1
477	Cyphenothrin	CC(=CC1C(C1(C)C)C(=O)OC(C#N)C2=CC(=CC=C2)OC3=CC=CC=C3)C	1	3	3	2	Moderate	4.86457	In	6	0	1
485	Cypyrafluone	CN1C(=O)C(=C(N1)C2CC2)C(=O)C3=C(C(=C(C=C3)C(F)(F)F)N4CCCCC4=O)Cl	1	3	3	2	Moderate	4.86457	In	6	0	1
500	Deltamethrin	CC1(C(C1C(=O)OC(C#N)C2=CC(=CC=C2)OC3=CC=CC=C3)C=C(Br)Br)C	1	3	3	2	Moderate	4.86457	In	6	0	1
514	Di-allate	CC(C)N(C(C)C)C(=O)SCC(=CCl)Cl	1	3	3	2	Moderate	4.86457	In	6	0	1
566	Difenacoum	C1C(CC2=CC=CC=C2C1C3=C(C4=CC=CC=C4OC3=O)O)C5=CC=C(C=C5)C6=CC=CC=C6	1	3	3	2	Moderate	4.86457	In	6	0	1
579	Dimefluthrin	CC(=CC1C(C1(C)C)C(=O)OCC2=C(C(=C(C(=C2F)F)COC)F)F)C	1	3	3	2	Moderate	4.86457	In	6	0	1
589	Dimethirimol	CCCCC1=C(NC(=NC1=O)N(C)C)C	1	3	3	2	Moderate	4.86457	In	6	0	1
591	Dimethomorph	COC1=C(C=C(C=C1)C(=CC(=O)N2CCOCC2)C3=CC=C(C=C3)Cl)OC	1	3	3	2	Moderate	4.86457	In	6	0	1
592	Dimethrin	CC1=CC(=C(C=C1)COC(=O)C2C(C2(C)C)C=C(C)C)C	1	3	3	2	Moderate	4.86457	In	6	0	1
596	Dimethylvinphos	COP(=O)(OC)OC(=CCl)C1=C(C=C(C=C1)Cl)Cl	1	3	3	2	Moderate	4.86457	In	6	0	1
620	Diphacinone sodium	C1=CC=C(C=C1)C(C2=CC=CC=C2)C(=C3C(=O)C4=CC=CC=C4C3=O)[O-]	1	3	3	2	Moderate	4.86457	In	6	0	1
685	Ethirimol	CCCCC1=C(NC(=NC1=O)NCC)C	1	3	3	2	Moderate	4.86457	In	6	0	1
693	Ethoxyquin	CCOC1=CC2=C(C=C1)NC(C=C2C)(C)C	1	3	3	2	Moderate	4.86457	In	6	0	1
727	Fenfluthrin	CC1(C(C1C(=O)OCC2=C(C(=C(C(=C2F)F)F)F)F)C=C(Cl)Cl)C	1	3	3	2	Moderate	4.86457	In	6	0	1
750	Fenpirithrin	CC1(C(C1C(=O)OC(C#N)C2=NC(=CC=C2)OC3=CC=CC=C3)C=C(Cl)Cl)C	1	3	3	2	Moderate	4.86457	In	6	0	1
784	Flocoumafen	C1C(CC2=CC=CC=C2C1C3=C(C4=CC=CC=C4OC3=O)O)C5=CC=C(C=C5)OCC6=CC=C(C=C6)C(F)(F)F	1	3	3	2	Moderate	4.86457	In	6	0	1
814	Fluensulfone	C1=C(SC(=N1)S(=O)(=O)CCC(=C(F)F)F)Cl	1	3	3	2	Moderate	4.86457	In	6	0	1
832	Flumorph	COC1=C(C=C(C=C1)C(=CC(=O)N2CCOCC2)C3=CC=C(C=C3)F)OC	1	3	3	2	Moderate	4.86457	In	6	0	1
908	Furethrin	CC1=C(C(=O)CC1OC(=O)C2C(C2(C)C)C=C(C)C)CC3=CC=CO3	1	3	3	2	Moderate	4.86457	In	6	0	1
931	Halacrinate	C=CC(=O)OC1=C(C=C(C2=C1N=CC=C2)Cl)Br	1	3	3	2	Moderate	4.86457	In	6	0	1
967	Imazalil	C=CCOC(CN1C=CN=C1)C2=C(C=C(C=C2)Cl)Cl	1	3	3	2	Moderate	4.86457	In	6	0	1
968	Imazalil nitrate	ClC1=CC(Cl)=C(C=C1)C(CN1C=CN=C1)OCC=C	1	3	3	2	Moderate	4.86457	In	6	0	1
969	Imazalil sulfate	C=CCOC(CN1C=CN=C1)C2=C(C=C(C=C2)Cl)Cl.OS(=O)(=O)O	1	3	3	2	Moderate	4.86457	In	6	0	1
988	Imiprothrin	CC(=CC1C(C1(C)C)C(=O)OCN2C(=O)CN(C2=O)CC#C)C	1	3	3	2	Moderate	4.86457	In	6	0	1
998	Iodobonil	C=CCOC(=O)OC1=C(C=C(C=C1I)C#N)I	1	3	3	2	Moderate	4.86457	In	6	0	1
1033	Isophorone	CC1=CC(=O)CC(C1)(C)C	1	3	3	2	Moderate	4.86457	In	6	0	1
1055	Kadethrin	CC1(C(C1C(=O)OCC2=COC(=C2)CC3=CC=CC=C3)C=C4CCSC4=O)C	1	3	3	2	Moderate	4.86457	In	6	0	1
1061	Ketospiradox	CC1=CC(=C(C2=C1S(=O)(=O)CCC23OCCO3)C)C(=C4C(=O)CCCC4=O)[O-]	1	3	3	2	Moderate	4.86457	In	6	0	1
1066	Lancotrione	S(=O)(=O)C1=C(C(=C(C=C1)C(=C2C(=O)CCCC2=O)O)Cl)OCCC3OCCO3	1	3	3	2	Moderate	4.86457	In	6	0	1
1067	Lancotrione sodium	CS(=O)(=O)C1=C(C(=C(C=C1)C(=O)C2=C(CCCC2=O)[O-])Cl)OCCC3OCCO3	1	3	3	2	Moderate	4.86457	In	6	0	1
1070	Lenacil	C1CCC(CC1)N2C(=O)C3=C(CCC3)NC2=O	1	3	3	2	Moderate	4.86457	In	6	0	1
1085	Malonoben	CC(C)(C)C1=CC(=CC(=C1O)C(C)(C)C)C=C(C#N)C#N	1	3	3	2	Moderate	4.86457	In	6	0	1
1127	Meperfluthrin	CC1(C(C1C(=O)OCC2=C(C(=C(C(=C2F)F)COC)F)F)C=C(Cl)Cl)C	1	3	3	2	Moderate	4.86457	In	6	0	1
1180	Methylisothiazoline	CN1C(=O)C=CS1	1	3	3	2	Moderate	4.86457	In	6	0	1
1205	Momfluorothrin	CC(=CC1C(C1(C)C)C(=O)OCC2=C(C(=C(C(=C2F)F)COC)F)F)C#N	1	3	3	2	Moderate	4.86457	In	6	0	1
1249	Norbormide	C1=CC=C(C=C1)C(=C2C3C=C(C2C4C3C(=O)NC4=O)C(C5=CC=CC=C5)(C6=CC=CC=N6)O)C7=CC=CC=N7	1	3	3	2	Moderate	4.86457	In	6	0	1
1259	Octhilinone	CCCCCCCCN1C(=O)C=CS1	1	3	3	2	Moderate	4.86457	In	6	0	1
1274	Oxaziclomefone	CC1=C(C(=O)N(CO1)C(C)(C)C2=CC(=CC(=C2)Cl)Cl)C3=CC=CC=C3	1	3	3	2	Moderate	4.86457	In	6	0	1
1290	Pefurazoate	CCC(C(=O)OCCCC=C)N(CC1=CC=CO1)C(=O)N2C=CN=C2	1	3	3	2	Moderate	4.86457	In	6	0	1
1300	Pentoxazone	CC(=C1C(=O)N(C(=O)O1)C2=CC(=C(C=C2F)Cl)OC3CCCC3)C	1	3	3	2	Moderate	4.86457	In	6	0	1
1302	Permethrin	CC1(C(C1C(=O)OCC2=CC(=CC=C2)OC3=CC=CC=C3)C=C(Cl)Cl)C	1	3	3	2	Moderate	4.86457	In	6	0	1
1304	Pethoxamid	CCOCCN(C(=O)CCl)C(=C(C)C)C1=CC=CC=C1	1	3	3	2	Moderate	4.86457	In	6	0	1
1308	Phenothrin	CC(=CC1C(C1(C)C)C(=O)OCC2=CC(=CC=C2)OC3=CC=CC=C3)C	1	3	3	2	Moderate	4.86457	In	6	0	1
1335	Piperonyl cyclonene	CCCCCCC1=CC(=O)CC(C1)C2=CC3=C(C=C2)OCO3	1	3	3	2	Moderate	4.86457	In	6	0	1
1338	Piproctanyl	CC(C)CCCC(C)CC[N+]1(CCCCC1)CC=C	1	3	3	2	Moderate	4.86457	In	6	0	1
1345	Polyacrylamide	CNC.C=CC(=O)N.C=O	1	3	3	2	Moderate	4.86457	In	6	0	1
1347	Prallethrin	CC1=C(C(=O)CC1OC(=O)C2C(C2(C)C)C=C(C)C)CC#C	1	3	3	2	Moderate	4.86457	In	6	0	1
1351	Probenazole	C=CCOC1=NS(=O)(=O)C2=CC=CC=C21	1	3	3	2	Moderate	4.86457	In	6	0	1
1352	Prochloraz	CC1=C(C(=O)CC1OC(=O)C2C(C2(C)C)C=C(C)C)CC#C	1	3	3	2	Moderate	4.86457	In	6	0	1
1360	Profoxydim	CCCC(=C1C(=O)CC(CC1=O)C2CCCSC2)NOCC(C)OC3=CC=C(C=C3)Cl	1	3	3	2	Moderate	4.86457	In	6	0	1
1404	Pyracarbolid	CC1=C(CCCO1)C(=O)NC2=CC=CC=C2	1	3	3	2	Moderate	4.86457	In	6	0	1
1412	Pyranocoumarin	CC1(CC(C2=C(O1)C3=CC=CC=C3OC2=O)C4=CC=CC=C4)OC	1	3	3	2	Moderate	4.86457	In	6	0	1
1415	Pyrasulfotole	CC1=C(C(=O)N(N1)C)C(=O)C2=C(C=C(C=C2)C(F)(F)F)S(=O)(=O)C	1	3	3	2	Moderate	4.86457	In	6	0	1
1431	Pyridafol	C1=CC=C(C=C1)C2=NNC(=CC2=O)Cl	1	3	3	2	Moderate	4.86457	In	6	0	1
1432	Pyridalyl	C1=CC(=NC=C1C(F)(F)F)OCCCOC2=C(C=C(C=C2Cl)OCC=C(Cl)Cl)Cl	1	3	3	2	Moderate	4.86457	In	6	0	1
1443	Pyrimorph	CC(C)(C)C1=CC=C(C=C1)C(=CC(=O)N2CCOCC2)C3=CC(=NC=C3)Cl	1	3	3	2	Moderate	4.86457	In	6	0	1
1468	Renofluthrin	CC1(C(C1C(=O)OCC2=C(C(=C(C(=C2F)F)COC)F)F)C=C(Cl)Cl)C	1	3	3	2	Moderate	4.86457	In	6	0	1
1469	Resmethrin	CC(=CC1C(C1(C)C)C(=O)OCC2=COC(=C2)CC3=CC=CC=C3)C	1	3	3	2	Moderate	4.86457	In	6	0	1
1482	Sethoxydim	CCCC(=C1C(=O)CC(CC1=O)CC(C)SCC)NOCC	1	3	3	2	Moderate	4.86457	In	6	0	1
1488	Silthiofam	CC1=C(SC(=C1C(=O)NCC=C)[Si](C)(C)C)C	1	3	3	2	Moderate	4.86457	In	6	0	1
1509	Spidoxamat	CC1=CC(=CC(=C1C2=C(C3(CCC4(CC3)OCCO4)NC2=O)O)C)Cl	1	3	3	2	Moderate	4.86457	In	6	0	1
1510	Spinetoram	CCC1CCCC(C(C(=O)C2=CC3C(C2CC(=O)O1)CCC4C3CC(C4)OC5C(C(C(C(O5)C)OC)OCC)OC)C)OC6CCC(C(O6)C)N(C)C	1	3	3	2	Moderate	4.86457	In	6	0	1
1511	Spirobudifen	CCCCOC(=O)OC1=C(C(=O)OC12CCCCC2)C3=C(C=C(C=C3)Cl)Cl	1	3	3	2	Moderate	4.86457	In	6	0	1
1512	Spirodiclofen	CCC(C)(C)C(=O)OC1=C(C(=O)OC12CCCCC2)C3=C(C=C(C=C3)Cl)Cl	1	3	3	2	Moderate	4.86457	In	6	0	1
1513	Spiromesifen	CC1=CC(=C(C(=C1)C)C2=C(C3(CCCC3)OC2=O)OC(=O)CC(C)(C)C)C	1	3	3	2	Moderate	4.86457	In	6	0	1
1514	Spiropidion	CCOC(=O)OC1=C(C(=O)N(C12CCN(CC2)OC)C)C3=C(C=C(C=C3C)Cl)C	1	3	3	2	Moderate	4.86457	In	6	0	1
1515	Spirotetramat	CCOC(=O)OC1=C(C(=O)NC12CCC(CC2)OC)C3=C(C=CC(=C3)C)C	1	3	3	2	Moderate	4.86457	In	6	0	1
1521	Sulfallate	CCN(CC)C(=S)SCC(=C)Cl	1	3	3	2	Moderate	4.86457	In	6	0	1
1533	Sumithrin	CC(=CC1C(C1(C)C)C(=O)OCC2=CC(=CC=C2)OC3=CC=CC=C3)C	1	3	3	2	Moderate	4.86457	In	6	0	1
1553	Terallethrin	CC1=C(C(=O)CC1OC(=O)C2C(C2(C)C)(C)C)CC=C	1	3	3	2	Moderate	4.86457	In	6	0	1
1563	Tetrachlorvinphos	COP(=O)(OC)OC(=CCl)C1=CC(=C(C=C1Cl)Cl)Cl	1	3	3	2	Moderate	4.86457	In	6	0	1
1567	Tetramethrin	CC(=CC1C(C1(C)C)C(=O)OCN2C(=O)C3=C(C2=O)CCCC3)C	1	3	3	2	Moderate	4.86457	In	6	0	1
1572	Theta-cypermethrin	CC1(C(C1C(=O)OC(C#N)C2=CC(=CC=C2)OC3=CC=CC=C3)C=C(Cl)Cl)C	1	3	3	2	Moderate	4.86457	In	6	0	1
1576	Thiapronil	C1=CC=C(C=C1)C2=CSC(=C(C#N)C(=O)C3=CC=CC=C3Cl)N2	1	3	3	2	Moderate	4.86457	In	6	0	1
1616	Tralkoxydim	CCC(=C1C(=O)CC(CC1=O)C2=C(C=C(C=C2C)C)C)NOCC	1	3	3	2	Moderate	4.86457	In	6	0	1
1621	Transfluthrin	CC1(C(C1C(=O)OCC2=C(C(=CC(=C2F)F)F)F)C=C(Cl)Cl)C	1	3	3	2	Moderate	4.86457	In	6	0	1
1622	Transpermethrin	CC1(C)C(C=C(Cl)Cl)C1C(=O)OCC1=CC(OC2=CC=CC=C2)=CC=C1	1	3	3	2	Moderate	4.86457	In	6	0	1
1628	Tri-allate	CC(C)N(C(C)C)C(=O)SCC(=C(Cl)Cl)Cl	1	3	3	2	Moderate	4.86457	In	6	0	1
1659	Trifluenfuronate	COC1=CC=CC=C1C2C(CC(=O)O2)C(=O)OCCC(=C(F)F)F	1	3	3	2	Moderate	4.86457	In	6	0	1
1670	Trinexapac-ethyl	CCOC(=O)C1CC(=O)C(=C(C2CC2)O)C(=O)C1	1	3	3	2	Moderate	4.86457	In	6	0	1
1674	Triticonazole	CC1(CCC(=CC2=CC=C(C=C2)Cl)C1(CN3C=NC=N3)O)C	1	3	3	2	Moderate	4.86457	In	6	0	1
1684	Vinclozolin	CC1(C(=O)N(C(=O)O1)C2=CC(=CC(=C2)Cl)Cl)C=C	1	3	3	2	Moderate	4.86457	In	6	0	1
1686	Warfarin	CC(=O)CC(C1=CC=CC=C1)C2=C(C3=CC=CC=C3OC2=O)O	1	3	3	2	Moderate	4.86457	In	6	0	1
1692	Zeta-cypermethrin	CC1(C(C1C(=O)OC(C#N)C2=CC(=CC=C2)OC3=CC=CC=C3)C=C(Cl)Cl)C	1	3	3	2	Moderate	4.86457	In	6	0	1
1015	IPSP	CCS(=O)CSP(=S)(OC(C)C)OC(C)C	1	3	3	2	Moderate	4.81629	In	37	0.114708	0.875
1052	Isoxathion	CCOP(=S)(OCC)OC1=NOC(=C1)C2=CC=CC=C2	1	3	3	2	Moderate	4.81629	In	37	0.114708	0.875
754	Fenpyrazamine	CC1=CC=CC=C1C2=C(N(N(C2=O)C(C)C)C(=O)SCC=C)N	1	3	3	2	Moderate	4.71802	In	6	0.09245	0.75
875	Flutianil	COC1=CC=CC=C1N2CCSC2=C(C#N)SC3=C(C=CC(=C3)C(F)(F)F)F	1	3	3	2	Moderate	4.71802	In	6	0.09245	0.75
63	Acethion	CCOC(=O)CSP(=S)(OCC)OCC	1	3	3	2	Moderate	4.66975	In	37	0	1
502	Demephion-O	COP(=S)(OC)OCCSC	1	3	3	2	Moderate	4.66975	In	37	0	1
503	Demeton	CCOP(=S)(OCC)OCCSCC	1	3	3	2	Moderate	4.66975	In	37	0	1
504	Demeton-O-methyl	CCSCCOP(=S)(OC)OC	1	3	3	2	Moderate	4.66975	In	37	0	1
505	Demeton-O-methyl sulfone	CCS(=O)(=O)CCOP(=S)(OC)OC	1	3	3	2	Moderate	4.66975	In	37	0	1
632	Disulfoton	CCOP(=S)(OCC)SCCSCC	1	3	3	2	Moderate	4.66975	In	37	0	1
633	Disulfoton sulfoxide	CCOP(=S)(OCC)SCCS(=O)CC	1	3	3	2	Moderate	4.66975	In	37	0	1
1030	Isomalathion	CCOC(=O)CC(C(=O)OCC)SP(=O)(OC)SC	1	3	3	2	Moderate	4.66975	In	37	0	1
1042	Isothioate	CC(C)SCCSP(=S)(OC)OC	1	3	3	2	Moderate	4.66975	In	37	0	1
1079	Malathion	CCOC(=O)CC(C(=O)OCC)SP(=S)(OC)OC	1	3	3	2	Moderate	4.66975	In	37	0	1
1309	Phenthoate	CCOC(=O)C(C1=CC=CC=C1)SP(=S)(OC)OC	1	3	3	2	Moderate	4.66975	In	37	0	1
1592	Thiometon	CCSCCSP(=S)(OC)OC	1	3	3	2	Moderate	4.66975	In	37	0	1
115	Amiprofos-methyl	CC1=CC(=C(C=C1)OP(=S)(NC(C)C)OC)[N+](=O)[O-]	1	3	3	2	Moderate	4.62143	In	27	0.110432	0.9
144	Azinphos-ethyl	CCOP(=S)(OCC)SCN1C(=O)C2=CC=CC=C2N=N1	1	3	3	2	Moderate	4.62143	In	27	0.110432	0.9
145	Azinphos-methyl	COP(=S)(OC)SCN1C(=O)C2=CC=CC=C2N=N1	1	3	3	2	Moderate	4.62143	In	27	0.110432	0.9
259	Butamifos	CCC(C)NP(=S)(OCC)OC1=C(C=CC(=C1)C)[N+](=O)[O-]	1	3	3	2	Moderate	4.62143	In	27	0.110432	0.9
374	Chlorprazophos	CCOP(=S)(OCC)OC1=NN2C(=CC=NC2=C1Cl)C	1	3	3	2	Moderate	4.62143	In	27	0.110432	0.9
1017	Isazofos	CCOP(=S)(OCC)OC1=NN(C(=N1)Cl)C(C)C	1	3	3	2	Moderate	4.62143	In	27	0.110432	0.9
1419	Pyrazophos	CCOC(=O)C1=CN2C(=CC(=N2)OP(=S)(OCC)OCC)N=C1C	1	3	3	2	Moderate	4.62143	In	27	0.110432	0.9
1454	Quinalphos	CCOP(=S)(OCC)OC1=NC2=CC=CC=C2N=C1	1	3	3	2	Moderate	4.62143	In	27	0.110432	0.9
1463	Quintiofos	CCOP(=S)(C1=CC=CC=C1)OC2=CC=CC3=C2N=CC=C3	1	3	3	2	Moderate	4.62143	In	27	0.110432	0.9
1593	Thionazin	CCOP(=S)(OCC)OC1=NC=CN=C1	1	3	3	2	Moderate	4.62143	In	27	0.110432	0.9
1636	Triazophos	CCOP(=S)(OCC)OC1=NN(C=N1)C2=CC=CC=C2	1	3	3	2	Moderate	4.62143	In	27	0.110432	0.9
501	Demephion	COP(=O)(OC)SCCSC	1	3	3	2	Moderate	4.5232	In	12	0	1
506	Demeton-S-methyl	CCSCCSP(=O)(OC)OC	1	3	3	2	Moderate	4.5232	In	12	0	1
507	Demeton-S-methyl sulfone	CCS(=O)(=O)CCSP(=O)(OC)OC	1	3	3	2	Moderate	4.5232	In	12	0	1
1281	Oxydemeton-methyl	CCS(=O)CCSP(=O)(OC)OC	1	3	3	2	Moderate	4.5232	In	12	0	1
1282	Oxydeprofos	CCS(=O)CC(C)SP(=O)(OC)OC	1	3	3	2	Moderate	4.5232	In	12	0	1
1681	Vamidothion	CC(C(=O)NC)SCCSP(=O)(OC)OC	1	3	3	2	Moderate	4.5232	In	12	0	1
827	Flumetylsulforim	CC1=CC=C(C=C1)S(=O)(=O)N2C=C(C(=N)N(C2=O)C)F	1	3	3	2	Moderate	4.52316	In	6	0.27735	0.5
103	Amidithion	COCCNC(=O)CSP(=S)(OC)OC	1	3	3	2	Moderate	4.47489	In	27	0	1
129	Anilofos	CC(C)N(C1=CC=C(C=C1)Cl)C(=O)CSP(=S)(OC)OC	1	3	3	2	Moderate	4.47489	In	27	0	1
137	Athidathion	CCOP(=S)(OCC)SCN1C(=O)SC(=N1)OC	1	3	3	2	Moderate	4.47489	In	27	0	1
487	DAEP	CC(=O)NCCSP(=S)(OC)OC	1	3	3	2	Moderate	4.47489	In	27	0	1
590	Dimethoate	CNC(=O)CSP(=S)(OC)OC	1	3	3	2	Moderate	4.47489	In	27	0	1
686	Ethoate-methyl	CCNC(=O)CSP(=S)(OC)OC	1	3	3	2	Moderate	4.47489	In	27	0	1
1078	Lythidathion	CCOC1=NN(C(=O)S1)CSP(=S)(OC)OC	1	3	3	2	Moderate	4.47489	In	27	0	1
1157	Methidathion	COC1=NN(C(=O)S1)CSP(=S)(OC)OC	1	3	3	2	Moderate	4.47489	In	27	0	1
1216	Morphothion	COP(=S)(OC)SCC(=O)N1CCOCC1	1	3	3	2	Moderate	4.47489	In	27	0	1
1337	Piperophos	CCCOP(=S)(OCCC)SCC(=O)N1CCCCC1C	1	3	3	2	Moderate	4.47489	In	27	0	1
1392	Prothidathion	CCOP(=S)(OCC)SCN1C(=O)SC(=N1)OC(C)C	1	3	3	2	Moderate	4.47489	In	27	0	1
1396	Prothoate	CCOP(=S)(OCC)SCC(=O)NC(C)C	1	3	3	2	Moderate	4.47489	In	27	0	1
175	Bensulide	CC(C)OP(=S)(OC(C)C)SCCNS(=O)(=O)C1=CC=CC=C1	1	3	3	2	Moderate	4.32834	In	27	0.110432	0.909091
890	Formothion	CN(C=O)C(=O)CSP(=S)(OC)OC	1	3	3	2	Moderate	4.32834	In	27	0.110432	0.909091
1	(4-chlorophenoxy)acetic acid	C1=CC(=CC=C1OCC(=O)O)Cl	1	3	3	2	Moderate	4.26637	In	10	0	NaN
3	(R)-flufiprole	CC(=C)CNC1=C(C(=NN1C2=C(C=C(C=C2Cl)C(F)(F)F)Cl)C#N)S(=O)C(F)(F)F	1	3	3	2	Moderate	4.26637	In	10	0	NaN
4	(R)-flutriafol	C1=CC=C(C(=C1)C(CN2C=NC=N2)(C3=CC=C(C=C3)F)O)F	1	3	3	2	Moderate	4.26637	In	10	0	NaN
5	(R)-hexaconazole	CCCCC(CN1C=NC=N1)(C2=C(C=C(C=C2)Cl)Cl)O	1	3	3	2	Moderate	4.26637	In	10	0	NaN
6	(S)-flutriafol	C1=CC=C(C(=C1)C(CN2C=NC=N2)(C3=CC=C(C=C3)F)O)F	1	3	3	2	Moderate	4.26637	In	10	0	NaN
7	1-(4-chloro-1,3-dihydro-1,3-dioxo-2H-isoindole-2-yl)-cyclohexanecarboxamide	C1CCC(CC1)(C(=O)N)N2C(=O)C3=C(C2=O)C(=CC=C3)Cl	1	3	3	2	Moderate	4.26637	In	10	0	NaN
8	1-(4-chlorophenyl)-3-(2,6-dichlorobenzoyl)urea	C1=CC(=C(C(=C1)Cl)C(=O)NC(=O)NC2=CC=C(C=C2)Cl)Cl	1	3	3	2	Moderate	4.26637	In	10	0	NaN
9	1,1,1,2-tetrachloroethane	C(C(Cl)(Cl)Cl)Cl	1	3	3	2	Moderate	4.26637	In	10	0	NaN
10	1,1,1-acetonitrile	CC#N	1	3	3	2	Moderate	4.26637	In	10	0	NaN
11	1,1,1-trichloroethane	CC(Cl)(Cl)Cl	1	3	3	2	Moderate	4.26637	In	10	0	NaN
12	1,1-bis(4-chlorophenyl)-2-ethoxyethanol	CCOCC(C1=CC=C(C=C1)Cl)(C2=CC=C(C=C2)Cl)O	1	3	3	2	Moderate	4.26637	In	10	0	NaN
13	1,1-dichloroethane	CC(Cl)Cl	1	3	3	2	Moderate	4.26637	In	10	0	NaN
14	1,2,3-trichloropropane	C(C(CCl)Cl)Cl	1	3	3	2	Moderate	4.26637	In	10	0	NaN
15	1,2-benzisothiazolin-3-one	C1=CC=C2C(=C1)C(=O)NS2	1	3	3	2	Moderate	4.26637	In	10	0	NaN
16	1,2-dibromoethane	C(CBr)Br	1	3	3	2	Moderate	4.26637	In	10	0	NaN
17	1,2-dichloropropane	CC(CCl)Cl	1	3	3	2	Moderate	4.26637	In	10	0	NaN
20	1,3-dinitrobenzene	C1=CC(=CC(=C1)[N+](=O)[O-])[N+](=O)[O-]	1	3	3	2	Moderate	4.26637	In	10	0	NaN
21	1,4-dimethylnaphthalene	CC1=CC=C(C2=CC=CC=C12)C	1	3	3	2	Moderate	4.26637	In	10	0	NaN
22	1,4-dioxane	C1COCCO1	1	3	3	2	Moderate	4.26637	In	10	0	NaN
23	10,10'-oxybisphenoxarsine	C1=CC=C2C(=C1)OC3=CC=CC=C3[As]2O[As]4C5=CC=CC=C5OC6=CC=CC=C64	1	3	3	2	Moderate	4.26637	In	10	0	NaN
24	1-decanol	CCCCCCCCCCO	1	3	3	2	Moderate	4.26637	In	10	0	NaN
26	1-methylnaphthalene	CC1=CC=CC2=CC=CC=C12	1	3	3	2	Moderate	4.26637	In	10	0	NaN
27	1-naphthylacetamide	C1=CC=C2C(=C1)C=CC=C2CC(=O)N	1	3	3	2	Moderate	4.26637	In	10	0	NaN
28	1-naphthylacetic acid	C1=CC=C2C(=C1)C=CC=C2CC(=O)O	1	3	3	2	Moderate	4.26637	In	10	0	NaN
29	1-octyl-2-pyrrolidone	CCCCCCCCN1CCCC1=O	1	3	3	2	Moderate	4.26637	In	10	0	NaN
30	2-(octylthio)ethanol	CCCCCCCCSCCO	1	3	3	2	Moderate	4.26637	In	10	0	NaN
31	2-(thiocyanomethylthio)benzothiazole	C1=CC=C2C(=C1)N=C(S2)SCSC#N	1	3	3	2	Moderate	4.26637	In	10	0	NaN
32	2,2-dibromo-3-nitrilopropionamide	C(#N)C(C(=O)N)(Br)Br	1	3	3	2	Moderate	4.26637	In	10	0	NaN
33	2,3,5-tri-iodobenzoic acid	C1=C(C=C(C(=C1I)I)C(=O)O)I	1	3	3	2	Moderate	4.26637	In	10	0	NaN
34	2,3,6-TBA	C1=CC(=C(C(=C1Cl)C(=O)O)Cl)Cl	1	3	3	2	Moderate	4.26637	In	10	0	NaN
35	2,4,5-trichlorophenol	C1=C(C(=CC(=C1Cl)Cl)Cl)O	1	3	3	2	Moderate	4.26637	In	10	0	NaN
36	2,4,5-trichlorophenoxyacetic acid	C1=C(C(=CC(=C1Cl)Cl)Cl)OCC(=O)O	1	3	3	2	Moderate	4.26637	In	10	0	NaN
37	2,4-D	C1=CC(=C(C=C1Cl)Cl)OCC(=O)O	1	3	3	2	Moderate	4.26637	In	10	0	NaN
38	2,4-DB	OC(=O)CCCOC1=C(Cl)C=C(Cl)C=C1	1	3	3	2	Moderate	4.26637	In	10	0	NaN
39	2,4-D-dimethylammonium	OC(=O)COC1=C(Cl)C=C(Cl)C=C1	1	3	3	2	Moderate	4.26637	In	10	0	NaN
40	2,4-DEP	C1=CC(=C(C=C1Cl)Cl)OCCOP(OCCOC2=C(C=C(C=C2)Cl)Cl)OCCOC3=C(C=C(C=C3)Cl)Cl	1	3	3	2	Moderate	4.26637	In	10	0	NaN
41	2,4-dimethylphenol	CC1=CC(=C(C=C1)O)C	1	3	3	2	Moderate	4.26637	In	10	0	NaN
42	2,5-dichlorobenzoic acid methyl ester	COC(=O)C1=C(C=CC(=C1)Cl)Cl	1	3	3	2	Moderate	4.26637	In	10	0	NaN
43	2,6-dichloro-N-((4-(trifluoromethyl)phenyl)methyl-benzamide	C1=CC(=C(C(=C1)Cl)C(=O)NCC2=CC=C(C=C2)C(F)(F)F)Cl	1	3	3	2	Moderate	4.26637	In	10	0	NaN
44	24-epibrassinolide	CC(C)C(C)C(C(C(C)C1CCC2C1(CCC3C2COC(=O)C4C3(CC(C(C4)O)O)C)C)O)O	1	3	3	2	Moderate	4.26637	In	10	0	NaN
46	2-aminobutane	CCC(C)N	1	3	3	2	Moderate	4.26637	In	10	0	NaN
47	2-butoxyethanol	CCCCOCCO	1	3	3	2	Moderate	4.26637	In	10	0	NaN
48	2-hydrazinoethanol	C(CO)NN	1	3	3	2	Moderate	4.26637	In	10	0	NaN
49	2-methoxyethanol	COCCO	1	3	3	2	Moderate	4.26637	In	10	0	NaN
50	2-methoxyethylmercury acetate	CC(=O)O[Hg]CCOC	1	3	3	2	Moderate	4.26637	In	10	0	NaN
51	2-methoxyethylmercury chloride	COC[CH2]	1	3	3	2	Moderate	4.26637	In	10	0	NaN
52	2-methyl naphthalene	CC1=CC2=CC=CC=C2C=C1	1	3	3	2	Moderate	4.26637	In	10	0	NaN
53	2-naphthyloxyacetic acid	c1ccc2cc(ccc2c1)OCC(=O)O	1	3	3	2	Moderate	4.26637	In	10	0	NaN
54	2-phenylphenol	C1=CC=C(C=C1)C2=CC=CC=C2O	1	3	3	2	Moderate	4.26637	In	10	0	NaN
55	4,4-methylenedianiline	C1=CC(=CC=C1CC2=CC=C(C=C2)N)N	1	3	3	2	Moderate	4.26637	In	10	0	NaN
56	4-aminopyridine	C1=CN=CC=C1N	1	3	3	2	Moderate	4.26637	In	10	0	NaN
57	8-hydroxyquinoline	C1=CC2=C(C(=C1)O)N=CC=C2	1	3	3	2	Moderate	4.26637	In	10	0	NaN
58	ACC	C1CC1(C(=O)O)N	1	3	3	2	Moderate	4.26637	In	10	0	NaN
61	Acetamide	CC(=O)N	1	3	3	2	Moderate	4.26637	In	10	0	NaN
62	Acetamiprid	CC(=NC#N)N(C)CC1=CN=C(C=C1)Cl	1	3	3	2	Moderate	4.26637	In	10	0	NaN
64	Acetochlor	CCC1=CC=CC(=C1N(COCC)C(=O)CCl)C	1	3	3	2	Moderate	4.26637	In	10	0	NaN
66	Acetoprole	CC(=O)C1=NN(C(=C1S(=O)C)N)C2=C(C=C(C=C2Cl)C(F)(F)F)Cl	1	3	3	2	Moderate	4.26637	In	10	0	NaN
69	Acifluorfen	C1=CC(=C(C=C1C(F)(F)F)Cl)OC2=CC(=C(C=C2)[N+](=O)[O-])C(=O)O	1	3	3	2	Moderate	4.26637	In	10	0	NaN
70	Acifluorfen-methyl	COC(=O)C1=C(C=CC(=C1)OC2=C(C=C(C=C2)C(F)(F)F)Cl)[N+](=O)[O-]	1	3	3	2	Moderate	4.26637	In	10	0	NaN
71	Acifluorfen-sodium	C1=CC(=C(C=C1C(F)(F)F)Cl)OC2=CC(=C(C=C2)[N+](=O)[O-])C(=O)[O-]	1	3	3	2	Moderate	4.26637	In	10	0	NaN
72	Aclonifen	C1=CC=C(C=C1)OC2=C(C(=C(C=C2)[N+](=O)[O-])N)Cl	1	3	3	2	Moderate	4.26637	In	10	0	NaN
76	Acynonapyr	CCCOC1=C(C=CC(=C1)C(F)(F)F)OC2CC3CCCC(C2)N3OC4=NC=C(C=C4)C(F)(F)F	1	3	3	2	Moderate	4.26637	In	10	0	NaN
77	AD-67	C1CCC2(CC1)N(CCO2)C(=O)C(Cl)Cl	1	3	3	2	Moderate	4.26637	In	10	0	NaN
79	Alachlor	CCC1=C(C(=CC=C1)CC)N(COC)C(=O)CCl	1	3	3	2	Moderate	4.26637	In	10	0	NaN
81	Aldicarb	CC(C)(C=NOC(=O)NC)SC	1	3	3	2	Moderate	4.26637	In	10	0	NaN
82	Aldimorph	CCCCCCCCCCCCN1CC(OC(C1)C)C	1	3	3	2	Moderate	4.26637	In	10	0	NaN
83	Aldoxycarb	CC(C)(C=NOC(=O)NC)S(=O)(=O)C	1	3	3	2	Moderate	4.26637	In	10	0	NaN
92	Alpha-chlorohydrin	C(C(CCl)O)O	1	3	3	2	Moderate	4.26637	In	10	0	NaN
95	Alpha-naphthylthiourea	C1=CC=C2C(=C1)C=CC=C2NC(=S)N	1	3	3	2	Moderate	4.26637	In	10	0	NaN
96	Aluminium ammonium sulphate	[O-]S([O-])(=O)=O	1	3	3	2	Moderate	4.26637	In	10	0	NaN
97	Aluminium phosphide	[Al]#P	1	3	3	2	Moderate	4.26637	In	10	0	NaN
98	Ametoctradin	CCCCCCCCC1=C(N2C(=NC=N2)N=C1CC)N	1	3	3	2	Moderate	4.26637	In	10	0	NaN
99	Ametridione	CCSC1=NC(=O)N(C(=O)N1N)CC(C)(C)C	1	3	3	2	Moderate	4.26637	In	10	0	NaN
100	Ametryn	CCNC1=NC(=NC(=N1)SC)NC(C)C	1	3	3	2	Moderate	4.26637	In	10	0	NaN
101	Amibuzin	CC(C)(C)C1=NN=C(N(C1=O)C)N(C)C	1	3	3	2	Moderate	4.26637	In	10	0	NaN
102	Amicarbazone	CC(C)C1=NN(C(=O)N1N)C(=O)NC(C)(C)C	1	3	3	2	Moderate	4.26637	In	10	0	NaN
104	Amidochlor	CCC1=C(C(=CC=C1)CC)N(CNC(=O)C)C(=O)CCl	1	3	3	2	Moderate	4.26637	In	10	0	NaN
108	Aminocarb	CC1=C(C=CC(=C1)OC(=O)NC)N(C)C	1	3	3	2	Moderate	4.26637	In	10	0	NaN
109	Aminocyclopyrachlor	C1CC1C2=NC(=C(C(=N2)N)Cl)C(=O)O	1	3	3	2	Moderate	4.26637	In	10	0	NaN
110	Aminocyclopyrachlor-methyl	COC(=O)C1=C(C(=NC(=N1)C2CC2)N)Cl	1	3	3	2	Moderate	4.26637	In	10	0	NaN
111	Aminocyclopyrachlor-potassium	C1CC1C2=NC(=C(C(=N2)N)Cl)C(=O)[O-]	1	3	3	2	Moderate	4.26637	In	10	0	NaN
112	Aminopyralid	C1=C(C(=C(N=C1Cl)C(=O)O)Cl)N	1	3	3	2	Moderate	4.26637	In	10	0	NaN
113	Aminopyralid-dimethylammonium	NC1=CC(Cl)=NC(C(O)=O)=C1Cl	1	3	3	2	Moderate	4.26637	In	10	0	NaN
114	Aminopyrofen	CC1=NC(=C(C=C1)C(=O)OCC2=CC=C(C=C2)OC3=CC=CC=C3)N	1	3	3	2	Moderate	4.26637	In	10	0	NaN
119	Amitraz	CC1=CC(=C(C=C1)N=CN(C)C=NC2=C(C=C(C=C2)C)C)C	1	3	3	2	Moderate	4.26637	In	10	0	NaN
120	Amitrole	C1=NNC(=N1)N	1	3	3	2	Moderate	4.26637	In	10	0	NaN
121	Ammonium acetate	CC(=O)[O-]	1	3	3	2	Moderate	4.26637	In	10	0	NaN
122	Ammonium carbonate	C(=O)([O-])[O-]	1	3	3	2	Moderate	4.26637	In	10	0	NaN
123	Ammonium sulphamate	NS(=O)(=O)[O-]	1	3	3	2	Moderate	4.26637	In	10	0	NaN
124	Ammonium sulphate	[O-]S(=O)(=O)[O-]	1	3	3	2	Moderate	4.26637	In	10	0	NaN
125	Ammonium thiocyanate	C(#N)[S-]	1	3	3	2	Moderate	4.26637	In	10	0	NaN
126	Ampropylfos	CCC(N)P(=O)(O)O	1	3	3	2	Moderate	4.26637	In	10	0	NaN
127	Ancymidol	COC1=CC=C(C=C1)C(C2CC2)(C3=CN=CN=C3)O	1	3	3	2	Moderate	4.26637	In	10	0	NaN
128	Anilazine	C1=CC=C(C(=C1)NC2=NC(=NC(=N2)Cl)Cl)Cl	1	3	3	2	Moderate	4.26637	In	10	0	NaN
130	Anisuron	CN(C)C(=O)N(C1=CC(=C(C=C1)Cl)Cl)C(=O)C2=CC=C(C=C2)OC	1	3	3	2	Moderate	4.26637	In	10	0	NaN
131	Aramite	CC(COC1=CC=C(C=C1)C(C)(C)C)OS(=O)OCCCl	1	3	3	2	Moderate	4.26637	In	10	0	NaN
132	Arsenic acid	O[As](=O)(O)O	1	3	3	2	Moderate	4.26637	In	10	0	NaN
133	Asomate	CN(C)C(=S)S[As](SC(=S)N(C)C)SC(=S)N(C)C	1	3	3	2	Moderate	4.26637	In	10	0	NaN
138	Atraton	CCNC1=NC(=NC(=N1)OC)NC(C)C	1	3	3	2	Moderate	4.26637	In	10	0	NaN
139	Atrazine	CCNC1=NC(=NC(=N1)Cl)NC(C)C	1	3	3	2	Moderate	4.26637	In	10	0	NaN
140	Azaconazole	C1COC(O1)(CN2C=NC=N2)C3=C(C=C(C=C3)Cl)Cl	1	3	3	2	Moderate	4.26637	In	10	0	NaN
141	Azafenidin	C#CCOC1=C(C=C(C(=C1)N2C(=O)N3CCCCC3=N2)Cl)Cl	1	3	3	2	Moderate	4.26637	In	10	0	NaN
148	Azobenzene	C1=CC=C(C=C1)N=NC2=CC=CC=C2	1	3	3	2	Moderate	4.26637	In	10	0	NaN
149	Azocyclotin	C1CCC(CC1)[Sn](C2CCCCC2)(C3CCCCC3)N4C=NC=N4	1	3	3	2	Moderate	4.26637	In	10	0	NaN
150	Azoluron	CCn1nccc1NC(=O)Nc2ccccc2	1	3	3	2	Moderate	4.26637	In	10	0	NaN
152	Azoxybenzene	C1=CC=C(C=C1)N=[N+](C2=CC=CC=C2)[O-]	1	3	3	2	Moderate	4.26637	In	10	0	NaN
153	Azoxystrobin	COC=C(C1=CC=CC=C1OC2=NC=NC(=C2)OC3=CC=CC=C3C#N)C(=O)OC	1	3	3	2	Moderate	4.26637	In	10	0	NaN
154	Barban	C1=CC(=CC(=C1)Cl)NC(=O)OCC#CCCl	1	3	3	2	Moderate	4.26637	In	10	0	NaN
155	Barium carbonate	C(=O)([O-])[O-]	1	3	3	2	Moderate	4.26637	In	10	0	NaN
156	Beflubutamid	CCC(C(=O)NCC1=CC=CC=C1)OC2=CC(=C(C=C2)F)C(F)(F)F	1	3	3	2	Moderate	4.26637	In	10	0	NaN
157	Benalaxyl	CC1=C(C(=CC=C1)C)N(C(C)C(=O)OC)C(=O)CC2=CC=CC=C2	1	3	3	2	Moderate	4.26637	In	10	0	NaN
158	Benalaxyl-M	CC1=C(C(=CC=C1)C)N(C(C)C(=O)OC)C(=O)CC2=CC=CC=C2	1	3	3	2	Moderate	4.26637	In	10	0	NaN
164	Benclothiaz	C1=CC2=C(C(=C1)Cl)SN=C2	1	3	3	2	Moderate	4.26637	In	10	0	NaN
165	Bendiocarb	CC1(OC2=C(O1)C(=CC=C2)OC(=O)NC)C	1	3	3	2	Moderate	4.26637	In	10	0	NaN
166	Benfluralin	CCCCN(CC)C1=C(C=C(C=C1[N+](=O)[O-])C(F)(F)F)[N+](=O)[O-]	1	3	3	2	Moderate	4.26637	In	10	0	NaN
168	Benfuresate	CCS(=O)(=O)OC1=CC2=C(C=C1)OCC2(C)C	1	3	3	2	Moderate	4.26637	In	10	0	NaN
169	Benodanil	C1=CC=C(C=C1)NC(=O)C2=CC=CC=C2I	1	3	3	2	Moderate	4.26637	In	10	0	NaN
170	Benomyl	CCCCNC(=O)N1C2=CC=CC=C2N=C1NC(=O)OC	1	3	3	2	Moderate	4.26637	In	10	0	NaN
171	Benoxacor	CC1COC2=CC=CC=C2N1C(=O)C(Cl)Cl	1	3	3	2	Moderate	4.26637	In	10	0	NaN
172	Benquinox	C1=CC=C(C=C1)C(=O)NNC2=CC=C(C=C2)N=O	1	3	3	2	Moderate	4.26637	In	10	0	NaN
176	Bensultap	CN(C)C(CSS(=O)(=O)C1=CC=CC=C1)CSS(=O)(=O)C2=CC=CC=C2	1	3	3	2	Moderate	4.26637	In	10	0	NaN
177	Bentaluron	CC(C)NC(=O)NC1=NC2=CC=CC=C2S1	1	3	3	2	Moderate	4.26637	In	10	0	NaN
178	Bentazone	CC(C)N1C(=O)C2=CC=CC=C2NS1(=O)=O	1	3	3	2	Moderate	4.26637	In	10	0	NaN
181	Bentonite	O=[Al]O[Al]=O	1	3	3	2	Moderate	4.26637	In	10	0	NaN
182	Benzadox	C1=CC=C(C=C1)C(=O)NOCC(=O)O	1	3	3	2	Moderate	4.26637	In	10	0	NaN
183	Benzadox ammonium	C1=CC=C(C=C1)C(=O)NOCC(=O)[O-]	1	3	3	2	Moderate	4.26637	In	10	0	NaN
184	Benzalkonium chloride	CC(C)(C)CC(C)(C)C1=CC=C(C=C1)OCCOCC[N+](C)(C)CC2=CC=CC=C2	1	3	3	2	Moderate	4.26637	In	10	0	NaN
185	Benzamacril	CN(CC1=CC=CC=C1)C=C(C#N)C(=O)O	1	3	3	2	Moderate	4.26637	In	10	0	NaN
186	Benzamacril isobutyl	CC(C)COC(=O)C(=CN(C)CC1=CC=CC=C1)C#N	1	3	3	2	Moderate	4.26637	In	10	0	NaN
187	Benzamorf	CCCCCCCCCCCCC1=CC=C(C=C1)S(O)(=O)=O	1	3	3	2	Moderate	4.26637	In	10	0	NaN
189	Benzipram	CC1=CC(=CC(=C1)C(=O)N(CC2=CC=CC=C2)C(C)C)C	1	3	3	2	Moderate	4.26637	In	10	0	NaN
191	Benzofenap	CC1=CC=C(C=C1)C(=O)COC2=C(C(=NN2C)C)C(=O)C3=C(C(=C(C=C3)Cl)C)Cl	1	3	3	2	Moderate	4.26637	In	10	0	NaN
193	Benzoic acid	C1=CC=C(C=C1)C(=O)O	1	3	3	2	Moderate	4.26637	In	10	0	NaN
194	Benzovindiflupyr	CN1C=C(C(=N1)C(F)F)C(=O)NC2=CC=CC3=C2C4CCC3C4=C(Cl)Cl	1	3	3	2	Moderate	4.26637	In	10	0	NaN
195	Benzoximate	CCON=C(C1=C(C=CC(=C1OC)Cl)OC)OC(=O)C2=CC=CC=C2	1	3	3	2	Moderate	4.26637	In	10	0	NaN
196	Benzoylprop	CC(C(=O)O)N(C1=CC(=C(C=C1)Cl)Cl)C(=O)C2=CC=CC=C2	1	3	3	2	Moderate	4.26637	In	10	0	NaN
197	Benzoylprop-ethyl	CCOC(=O)C(C)N(C1=CC(=C(C=C1)Cl)Cl)C(=O)C2=CC=CC=C2	1	3	3	2	Moderate	4.26637	In	10	0	NaN
198	Benzthiazuron	CNC(=O)NC1=NC2=CC=CC=C2S1	1	3	3	2	Moderate	4.26637	In	10	0	NaN
199	Benzyl benzoate	C1=CC=C(C=C1)COC(=O)C2=CC=CC=C2	1	3	3	2	Moderate	4.26637	In	10	0	NaN
203	Bethoxazin	C1CS(=O)C(=NO1)C2=CC3=CC=CC=C3S2	1	3	3	2	Moderate	4.26637	In	10	0	NaN
205	Bifenazate	CC(C)OC(=O)NNC1=C(C=CC(=C1)C2=CC=CC=C2)OC	1	3	3	2	Moderate	4.26637	In	10	0	NaN
206	Bifenox	COC(=O)C1=C(C=CC(=C1)OC2=C(C=C(C=C2)Cl)Cl)[N+](=O)[O-]	1	3	3	2	Moderate	4.26637	In	10	0	NaN
212	Biphenyl	C1=CC=C(C=C1)C2=CC=CC=C2	1	3	3	2	Moderate	4.26637	In	10	0	NaN
213	Bipyrazone	CC1=NN(C=C1C(=O)OC2=C(C(=NN2C)C)C(=O)C3=C(C=C(C=C3)C(F)(F)F)S(=O)(=O)C)C	1	3	3	2	Moderate	4.26637	In	10	0	NaN
214	Bis(2-chloroethyl)ether	C(CCl)OCCCl	1	3	3	2	Moderate	4.26637	In	10	0	NaN
215	Bis(methylmercury) sulphate	C[Hg]OS(=O)(=O)O[Hg]C	1	3	3	2	Moderate	4.26637	In	10	0	NaN
216	Bismerthiazol	C(NC1=NNC(=S)S1)NC2=NNC(=S)S2	1	3	3	2	Moderate	4.26637	In	10	0	NaN
217	Bispyribac	COC1=CC(=NC(=N1)OC2=C(C(=CC=C2)OC3=NC(=CC(=N3)OC)OC)C(=O)O)OC	1	3	3	2	Moderate	4.26637	In	10	0	NaN
218	Bispyribac-sodium	COC1=CC(=NC(=N1)OC2=C(C(=CC=C2)OC3=NC(=CC(=N3)OC)OC)C(=O)[O-])OC	1	3	3	2	Moderate	4.26637	In	10	0	NaN
220	Bis-trichloromethyl sulfone	C(S(=O)(=O)C(Cl)(Cl)Cl)(Cl)(Cl)Cl	1	3	3	2	Moderate	4.26637	In	10	0	NaN
221	Bistrifluron	C1=CC(=C(C(=C1)F)C(=O)NC(=O)NC2=CC(=CC(=C2Cl)C(F)(F)F)C(F)(F)F)F	1	3	3	2	Moderate	4.26637	In	10	0	NaN
222	Bitertanol	CC(C)(C)C(C(N1C=NC=N1)OC2=CC=C(C=C2)C3=CC=CC=C3)O	1	3	3	2	Moderate	4.26637	In	10	0	NaN
223	Bithionol	C1=C(C=C(C(=C1Cl)O)SC2=CC(=CC(=C2O)Cl)Cl)Cl	1	3	3	2	Moderate	4.26637	In	10	0	NaN
224	Bixafen	CN1C=C(C(=N1)C(F)F)C(=O)NC2=C(C=C(C=C2)F)C3=CC(=C(C=C3)Cl)Cl	1	3	3	2	Moderate	4.26637	In	10	0	NaN
225	Bixlozone	CC1(CON(C1=O)CC2=C(C=C(C=C2)Cl)Cl)C	1	3	3	2	Moderate	4.26637	In	10	0	NaN
226	Boscalid	C1=CC=C(C(=C1)C2=CC=C(C=C2)Cl)NC(=O)C3=C(N=CC=C3)Cl	1	3	3	2	Moderate	4.26637	In	10	0	NaN
228	Broflanilide	CN(C1=CC=CC(=C1F)C(=O)NC2=C(C=C(C=C2Br)C(C(F)(F)F)(C(F)(F)F)F)C(F)(F)F)C(=O)C3=CC=CC=C3	1	3	3	2	Moderate	4.26637	In	10	0	NaN
229	Brofluthrinate	CC(C)C(C1=CC=C(C=C1)OC(F)F)C(=O)OC(C#N)C2=CC(=CC=C2)OC3=CC=C(C=C3)Br	1	3	3	2	Moderate	4.26637	In	10	0	NaN
233	Bromethalin	CN(C1=C(C=C(C=C1C(F)(F)F)[N+](=O)[O-])[N+](=O)[O-])C2=C(C=C(C=C2Br)Br)Br	1	3	3	2	Moderate	4.26637	In	10	0	NaN
235	Bromobonil	C1CC(OC1)COC(=O)OC2=C(C=C(C=C2Br)C#N)Br	1	3	3	2	Moderate	4.26637	In	10	0	NaN
236	Bromobutide	CC(C)(C)C(C(=O)NC(C)(C)C1=CC=CC=C1)Br	1	3	3	2	Moderate	4.26637	In	10	0	NaN
239	Bromomethane	CBr	1	3	3	2	Moderate	4.26637	In	10	0	NaN
242	Bromopropylate	CC(C)OC(=O)C(C1=CC=C(C=C1)Br)(C2=CC=C(C=C2)Br)O	1	3	3	2	Moderate	4.26637	In	10	0	NaN
243	Bromoxynil	C1=C(C=C(C(=C1Br)O)Br)C#N	1	3	3	2	Moderate	4.26637	In	10	0	NaN
244	Bromoxynil-butanoate	CCCC(=O)OC1=C(C=C(C=C1Br)C#N)Br	1	3	3	2	Moderate	4.26637	In	10	0	NaN
245	Bromoxynil-octanoate	CCCCCCCC(=O)OC1=C(C=C(C=C1Br)C#N)Br	1	3	3	2	Moderate	4.26637	In	10	0	NaN
246	Bromoxynil-potassium	C1=C(C=C(C(=C1Br)[O-])Br)C#N	1	3	3	2	Moderate	4.26637	In	10	0	NaN
248	Bromuconazole	C1C(COC1(CN2C=NC=N2)C3=C(C=C(C=C3)Cl)Cl)Br	1	3	3	2	Moderate	4.26637	In	10	0	NaN
249	Bromuron	CN(C)C(=O)NC1=CC=C(C=C1)Br	1	3	3	2	Moderate	4.26637	In	10	0	NaN
250	Bronopol	C(C(CO)([N+](=O)[O-])Br)O	1	3	3	2	Moderate	4.26637	In	10	0	NaN
252	Bucarpolate	CCCCOCCOCCOC(=O)C1=CC2=C(C=C1)OCO2	1	3	3	2	Moderate	4.26637	In	10	0	NaN
253	Bufencarb	CCCC(C)C1=CC(OC(=O)NC)=CC=C1	1	3	3	2	Moderate	4.26637	In	10	0	NaN
254	Buminafos	CCCCNC1(CCCCC1)P(=O)(OCCCC)OCCCC	1	3	3	2	Moderate	4.26637	In	10	0	NaN
256	Buprofezin	CC(C)N1C(=NC(C)(C)C)SCN(C1=O)C2=CC=CC=C2	1	3	3	2	Moderate	4.26637	In	10	0	NaN
257	Butachlor	CCCCOCN(C1=C(C=CC=C1CC)CC)C(=O)CCl	1	3	3	2	Moderate	4.26637	In	10	0	NaN
260	Butan-1-ol	CCCCO	1	3	3	2	Moderate	4.26637	In	10	0	NaN
261	Butanethiol	C(CC)CS	1	3	3	2	Moderate	4.26637	In	10	0	NaN
264	Buthidazole	CC(C)(C)C1=NN=C(S1)N2C(CN(C2=O)C)O	1	3	3	2	Moderate	4.26637	In	10	0	NaN
266	Buthiuron	CCCCS(=O)(=O)C1=NN=C(S1)N(C)C(=O)NC	1	3	3	2	Moderate	4.26637	In	10	0	NaN
267	Butocarboxim	CC(C(=NOC(=O)NC)C)SC	1	3	3	2	Moderate	4.26637	In	10	0	NaN
268	Butonate	CCCC(=O)OC(C(Cl)(Cl)Cl)P(=O)(OC)OC	1	3	3	2	Moderate	4.26637	In	10	0	NaN
270	Butoxycarboxim	CC(C(=NOC(=O)NC)C)S(=O)(=O)C	1	3	3	2	Moderate	4.26637	In	10	0	NaN
271	Butralin	CCC(C)NC1=C(C=C(C=C1[N+](=O)[O-])C(C)(C)C)[N+](=O)[O-]	1	3	3	2	Moderate	4.26637	In	10	0	NaN
273	Buturon	CC(C#C)N(C)C(=O)NC1=CC=C(C=C1)Cl	1	3	3	2	Moderate	4.26637	In	10	0	NaN
274	Butyl stearate	CCCCCCCCCCCCCCCCCC(=O)OCCCC	1	3	3	2	Moderate	4.26637	In	10	0	NaN
275	Butylate	CCSC(=O)N(CC(C)C)CC(C)C	1	3	3	2	Moderate	4.26637	In	10	0	NaN
276	Cacodylic acid	C[As](=O)(C)O	1	3	3	2	Moderate	4.26637	In	10	0	NaN
280	Calcium acetate	CC(=O)[O-].CC(=O)[O-]	1	3	3	2	Moderate	4.26637	In	10	0	NaN
281	Calcium arsenate	[O-][As]([O-])([O-])=O	1	3	3	2	Moderate	4.26637	In	10	0	NaN
282	Calcium carbide	[C-]#[C-]	1	3	3	2	Moderate	4.26637	In	10	0	NaN
283	Calcium carbonate	C(=O)([O-])[O-]	1	3	3	2	Moderate	4.26637	In	10	0	NaN
284	Calcium cyanamide	C(=[N-])=[N-]	1	3	3	2	Moderate	4.26637	In	10	0	NaN
285	Calcium phosphate	[O-]P([O-])([O-])=O	1	3	3	2	Moderate	4.26637	In	10	0	NaN
286	Calvinphos	COP([O-])(=O)OC=C(Cl)Cl	1	3	3	2	Moderate	4.26637	In	10	0	NaN
287	Cambendichlor	COC1=C(C=CC(=C1C(=O)OCCN(CCOC(=O)C2=C(C=CC(=C2OC)Cl)Cl)C3=CC=CC=C3)Cl)Cl	1	3	3	2	Moderate	4.26637	In	10	0	NaN
288	Camphechlor	C1C2C(C(C(C1(Cl)Cl)(C2(CCl)C(Cl)Cl)CCl)Cl)Cl	1	3	3	2	Moderate	4.26637	In	10	0	NaN
292	Carbanolate	CC1=CC(=C(C=C1C)Cl)OC(=O)NC	1	3	3	2	Moderate	4.26637	In	10	0	NaN
293	Carbaryl	CNC(=O)OC1=CC=CC2=CC=CC=C21	1	3	3	2	Moderate	4.26637	In	10	0	NaN
295	Carbendazim	COC(=O)NC1=NC2=CC=CC=C2N1	1	3	3	2	Moderate	4.26637	In	10	0	NaN
296	Carbetamide	CCNC(=O)C(C)OC(=O)NC1=CC=CC=C1	1	3	3	2	Moderate	4.26637	In	10	0	NaN
297	Carbofuran	CC1(CC2=C(O1)C(=CC=C2)OC(=O)NC)C	1	3	3	2	Moderate	4.26637	In	10	0	NaN
298	Carbon dioxide	C(=O)=O	1	3	3	2	Moderate	4.26637	In	10	0	NaN
299	Carbon disulphide	C(=S)=S	1	3	3	2	Moderate	4.26637	In	10	0	NaN
300	Carbon tetrachloride	C(Cl)(Cl)(Cl)Cl	1	3	3	2	Moderate	4.26637	In	10	0	NaN
302	Carbosulfan	CCCCN(CCCC)SN(C)C(=O)OC1=CC=CC2=C1OC(C2)(C)C	1	3	3	2	Moderate	4.26637	In	10	0	NaN
303	Carboxazole	CC(C)(C)C1=CC(=NO1)NC(=O)OC	1	3	3	2	Moderate	4.26637	In	10	0	NaN
305	Carfentrazone	CC1=NN(C(=O)N1C(F)F)C2=C(C=C(C(=C2)CC(C(=O)O)Cl)Cl)F	1	3	3	2	Moderate	4.26637	In	10	0	NaN
306	Carfentrazone-ethyl	CCOC(=O)C(CC1=CC(=C(C=C1Cl)F)N2C(=O)N(C(=N2)C)C(F)F)Cl	1	3	3	2	Moderate	4.26637	In	10	0	NaN
307	Carpropamid	CCC1(C(C1(Cl)Cl)C)C(=O)NC(C)C2=CC=C(C=C2)Cl	1	3	3	2	Moderate	4.26637	In	10	0	NaN
308	Cartap	CN(C)C(CSC(=O)N)CSC(=O)N	1	3	3	2	Moderate	4.26637	In	10	0	NaN
309	Cartap hydrochloride	CN(C)C(CSC(=O)N)CSC(=O)N.Cl	1	3	3	2	Moderate	4.26637	In	10	0	NaN
310	Cetrimide	CCCCCCCCCCCCCC[N+](C)(C)C	1	3	3	2	Moderate	4.26637	In	10	0	NaN
311	Chinomethionat	CC1=CC2=C(C=C1)N=C3C(=N2)SC(=O)S3	1	3	3	2	Moderate	4.26637	In	10	0	NaN
312	Chlobenthiazone	CN1C2=C(C=CC=C2Cl)SC1=O	1	3	3	2	Moderate	4.26637	In	10	0	NaN
313	Chlomethoxyfen	COC1=C(C=CC(=C1)OC2=C(C=C(C=C2)Cl)Cl)[N+](=O)[O-]	1	3	3	2	Moderate	4.26637	In	10	0	NaN
314	Chloral hydrate	C(C(Cl)(Cl)Cl)(O)O	1	3	3	2	Moderate	4.26637	In	10	0	NaN
315	Chloralose	C(C(C1C(C2C(O1)OC(O2)C(Cl)(Cl)Cl)O)O)O	1	3	3	2	Moderate	4.26637	In	10	0	NaN
316	Chloramben	C1=C(C=C(C(=C1N)Cl)C(=O)O)Cl	1	3	3	2	Moderate	4.26637	In	10	0	NaN
317	Chloramben-ammonium	C1=C(C=C(C(=C1C(=O)[O-])Cl)N)Cl	1	3	3	2	Moderate	4.26637	In	10	0	NaN
318	Chloraniformethan	C1=CC(=C(C=C1NC(C(Cl)(Cl)Cl)NC=O)Cl)Cl	1	3	3	2	Moderate	4.26637	In	10	0	NaN
320	Chloranocryl	CC(=C)C(=O)NC1=CC(=C(C=C1)Cl)Cl	1	3	3	2	Moderate	4.26637	In	10	0	NaN
321	Chlorantraniliprole	CC1=C(C(=CC(=C1)Cl)C(=O)NC)NC(=O)C2=CC(=NN2C3=C(C=CC=N3)Cl)Br	1	3	3	2	Moderate	4.26637	In	10	0	NaN
322	Chlorazifop	CC(C(=O)O)OC1=CC=C(C=C1)OC2=C(C=C(C=N2)Cl)Cl	1	3	3	2	Moderate	4.26637	In	10	0	NaN
323	Chlorazifop propargyl	CC(C(=O)OCC#C)OC1=CC=C(C=C1)OC2=C(C=C(C=N2)Cl)Cl	1	3	3	2	Moderate	4.26637	In	10	0	NaN
324	Chlorazine	CCN(CC)C1=NC(=NC(=N1)Cl)N(CC)CC	1	3	3	2	Moderate	4.26637	In	10	0	NaN
325	Chlorbenside	C1=CC(=CC=C1CSC2=CC=C(C=C2)Cl)Cl	1	3	3	2	Moderate	4.26637	In	10	0	NaN
327	Chlorbromuron	CN(C(=O)NC1=CC(=C(C=C1)Br)Cl)OC	1	3	3	2	Moderate	4.26637	In	10	0	NaN
328	Chlorbufam	CC(C#C)OC(=O)NC1=CC(=CC=C1)Cl	1	3	3	2	Moderate	4.26637	In	10	0	NaN
330	Chlordecone	C1(=O)C2(C3(C4(C1(C5(C2(C3(C(C45Cl)(Cl)Cl)Cl)Cl)Cl)Cl)Cl)Cl)Cl	1	3	3	2	Moderate	4.26637	In	10	0	NaN
331	Chlordimeform	CC1=C(C=CC(=C1)Cl)N=CN(C)C	1	3	3	2	Moderate	4.26637	In	10	0	NaN
332	Chlordimeform hydrochloride	CN(C)C=NC1=C(C)C=C(Cl)C=C1	1	3	3	2	Moderate	4.26637	In	10	0	NaN
335	Chloreturon	CCOC1=C(C=C(C=C1)NC(=O)N(C)C)Cl	1	3	3	2	Moderate	4.26637	In	10	0	NaN
336	Chlorfenac	C1=CC(=C(C(=C1Cl)CC(=O)O)Cl)Cl	1	3	3	2	Moderate	4.26637	In	10	0	NaN
337	Chlorfenapyr	CCOCN1C(=C(C(=C1C(F)(F)F)Br)C#N)C2=CC=C(C=C2)Cl	1	3	3	2	Moderate	4.26637	In	10	0	NaN
338	Chlorfenazole	C1=CC=C(C(=C1)C2=NC3=CC=CC=C3N2)Cl	1	3	3	2	Moderate	4.26637	In	10	0	NaN
339	Chlorfenethol	CC(C1=CC=C(C=C1)Cl)(C2=CC=C(C=C2)Cl)O	1	3	3	2	Moderate	4.26637	In	10	0	NaN
340	Chlorfenprop	C1=CC(=CC=C1CC(C(=O)O)Cl)Cl	1	3	3	2	Moderate	4.26637	In	10	0	NaN
341	Chlorfenprop-methyl	COC(=O)C(CC1=CC=C(C=C1)Cl)Cl	1	3	3	2	Moderate	4.26637	In	10	0	NaN
342	Chlorfenson	C1=CC(=CC=C1OS(=O)(=O)C2=CC=C(C=C2)Cl)Cl	1	3	3	2	Moderate	4.26637	In	10	0	NaN
343	Chlorfensulphide	C1=CC(=CC=C1SN=NC2=CC(=C(C=C2Cl)Cl)Cl)Cl	1	3	3	2	Moderate	4.26637	In	10	0	NaN
345	Chlorfluazole	C1=CC(=C(C2=C1NC(=N2)C(F)(F)F)Cl)Cl	1	3	3	2	Moderate	4.26637	In	10	0	NaN
346	Chlorfluazuron	C1=CC(=C(C(=C1)F)C(=O)NC(=O)NC2=CC(=C(C(=C2)Cl)OC3=C(C=C(C=N3)C(F)(F)F)Cl)Cl)F	1	3	3	2	Moderate	4.26637	In	10	0	NaN
347	Chlorfluren	C1=CC=C2C3=C(C=C(C=C3)Cl)C(C2=C1)C(=O)O	1	3	3	2	Moderate	4.26637	In	10	0	NaN
348	Chlorfluren methyl	COC(=O)C1C2=CC=CC=C2C3=C1C=C(C=C3)Cl	1	3	3	2	Moderate	4.26637	In	10	0	NaN
349	Chlorflurenol	C1=CC=C2C(=C1)C3=C(C2(C(=O)O)O)C=C(C=C3)Cl	1	3	3	2	Moderate	4.26637	In	10	0	NaN
350	Chlorflurenol methyl	COC(=O)C1(C2=CC=CC=C2C3=C1C=C(C=C3)Cl)O	1	3	3	2	Moderate	4.26637	In	10	0	NaN
354	Chlorine dioxide	O=Cl[O]	1	3	3	2	Moderate	4.26637	In	10	0	NaN
356	Chlormequat	C[N+](C)(C)CCCl	1	3	3	2	Moderate	4.26637	In	10	0	NaN
357	Chlornitrofen	C1=CC(=CC=C1[N+](=O)[O-])OC2=C(C=C(C=C2Cl)Cl)Cl	1	3	3	2	Moderate	4.26637	In	10	0	NaN
358	Chlorobenzilate	CCOC(=O)C(C1=CC=C(C=C1)Cl)(C2=CC=C(C=C2)Cl)O	1	3	3	2	Moderate	4.26637	In	10	0	NaN
359	Chloroneb	COC1=CC(=C(C=C1Cl)OC)Cl	1	3	3	2	Moderate	4.26637	In	10	0	NaN
360	Chlorophacinone	C1=CC=C(C=C1)C(C2=CC=C(C=C2)Cl)C(=O)C3C(=O)C4=CC=CC=C4C3=O	1	3	3	2	Moderate	4.26637	In	10	0	NaN
361	Chloropicrin	C([N+](=O)[O-])(Cl)(Cl)Cl	1	3	3	2	Moderate	4.26637	In	10	0	NaN
362	Chloropon	C(C(C(=O)O)(Cl)Cl)Cl	1	3	3	2	Moderate	4.26637	In	10	0	NaN
364	Chloropropylate	CC(C)OC(=O)C(C1=CC=C(C=C1)Cl)(C2=CC=C(C=C2)Cl)O	1	3	3	2	Moderate	4.26637	In	10	0	NaN
365	Chlorothalonil	C(#N)C1=C(C(=C(C(=C1Cl)Cl)Cl)C#N)Cl	1	3	3	2	Moderate	4.26637	In	10	0	NaN
366	Chlorotoluene	C1=CC=C(C=C1)CCl	1	3	3	2	Moderate	4.26637	In	10	0	NaN
367	Chlorotoluron	CC1=C(C=C(C=C1)NC(=O)N(C)C)Cl	1	3	3	2	Moderate	4.26637	In	10	0	NaN
368	Chloroxuron	CN(C)C(=O)NC1=CC=C(C=C1)OC2=CC=C(C=C2)Cl	1	3	3	2	Moderate	4.26637	In	10	0	NaN
369	Chloroxylenol	CC1=CC(=CC(=C1Cl)C)O	1	3	3	2	Moderate	4.26637	In	10	0	NaN
370	Chloroxynil	C1=C(C=C(C(=C1Cl)O)Cl)C#N	1	3	3	2	Moderate	4.26637	In	10	0	NaN
371	Chlorphonium	CCCC[P+](CCCC)(CCCC)CC1=C(C=C(C=C1)Cl)Cl	1	3	3	2	Moderate	4.26637	In	10	0	NaN
372	Chlorphonium chloride	CCCC[P+](CCCC)(CCCC)CC1=C(C=C(C=C1)Cl)Cl	1	3	3	2	Moderate	4.26637	In	10	0	NaN
375	Chlorprocarb	CCC(CCl)NC(=O)OC1=CC=CC(=C1)NC(=O)OC	1	3	3	2	Moderate	4.26637	In	10	0	NaN
376	Chlorpropham	CC(C)OC(=O)NC1=CC(=CC=C1)Cl	1	3	3	2	Moderate	4.26637	In	10	0	NaN
379	Chlorquinox	C1=CN=C2C(=C(C(=C(C2=N1)Cl)Cl)Cl)Cl	1	3	3	2	Moderate	4.26637	In	10	0	NaN
381	Chlorthal	C1(=C(C(=C(C(=C1Cl)Cl)C(=O)O)Cl)Cl)C(=O)O	1	3	3	2	Moderate	4.26637	In	10	0	NaN
382	Chlorthal-dimethyl	COC(=O)C1=C(C(=C(C(=C1Cl)Cl)C(=O)OC)Cl)Cl	1	3	3	2	Moderate	4.26637	In	10	0	NaN
383	Chlorthal-monomethyl	COC(=O)C1=C(C(=C(C(=C1Cl)Cl)C(=O)O)Cl)Cl	1	3	3	2	Moderate	4.26637	In	10	0	NaN
384	Chlorthiamid	C1=CC(=C(C(=C1)Cl)C(=S)N)Cl	1	3	3	2	Moderate	4.26637	In	10	0	NaN
387	Chlozolinate	CCOC(=O)C1(C(=O)N(C(=O)O1)C2=CC(=CC(=C2)Cl)Cl)C	1	3	3	2	Moderate	4.26637	In	10	0	NaN
389	Choline chloride	C[N+](C)(C)CCO	1	3	3	2	Moderate	4.26637	In	10	0	NaN
390	Chromafenozide	CC1=CC(=CC(=C1)C(=O)N(C(C)(C)C)NC(=O)C2=C(C3=C(C=C2)OCCC3)C)C	1	3	3	2	Moderate	4.26637	In	10	0	NaN
392	Cinmethylin	CC1=CC=CC=C1COC2CC3(CCC2(O3)C)C(C)C	1	3	3	2	Moderate	4.26637	In	10	0	NaN
394	Ciobutide	CCC(C#N)(C1=CC=CC=C1)C(=O)N	1	3	3	2	Moderate	4.26637	In	10	0	NaN
395	Cisanilide	CC1CCC(N1C(=O)NC2=CC=CC=C2)C	1	3	3	2	Moderate	4.26637	In	10	0	NaN
397	Clacyfos	CC(OC(=O)COC1=C(C=C(C=C1)Cl)Cl)P(=O)(OC)OC	1	3	3	2	Moderate	4.26637	In	10	0	NaN
399	Climbazole	CC(C)(C)C(=O)C(N1C=CN=C1)OC2=CC=C(C=C2)Cl	1	3	3	2	Moderate	4.26637	In	10	0	NaN
400	Cliodinate	CC(=O)OC1=C(C(=NC=C1I)Cl)I	1	3	3	2	Moderate	4.26637	In	10	0	NaN
401	Clodinafop	CC(C(=O)O)OC1=CC=C(C=C1)OC2=NC=C(C=C2F)Cl	1	3	3	2	Moderate	4.26637	In	10	0	NaN
402	Clodinafop propargyl	CC(C(=O)OCC#C)OC1=CC=C(C=C1)OC2=NC=C(C=C2F)Cl	1	3	3	2	Moderate	4.26637	In	10	0	NaN
403	Cloethocarb	CNC(=O)OC1=CC=CC=C1OC(CCl)OC	1	3	3	2	Moderate	4.26637	In	10	0	NaN
406	Clofentezine	C1=CC=C(C(=C1)C2=NN=C(N=N2)C3=CC=CC=C3Cl)Cl	1	3	3	2	Moderate	4.26637	In	10	0	NaN
407	Clofibric acid	CC(C)(C(=O)O)OC1=CC=C(C=C1)Cl	1	3	3	2	Moderate	4.26637	In	10	0	NaN
408	Clofop	CC(C(=O)O)OC1=CC=C(C=C1)OC2=CC=C(C=C2)Cl	1	3	3	2	Moderate	4.26637	In	10	0	NaN
409	Clofop-isobutyl	CC(C)COC(=O)C(C)OC1=CC=C(C=C1)OC2=CC=C(C=C2)Cl	1	3	3	2	Moderate	4.26637	In	10	0	NaN
410	Clomazone	CC1(CON(C1=O)CC2=CC=CC=C2Cl)C	1	3	3	2	Moderate	4.26637	In	10	0	NaN
411	Clomeprop	CC1=C(C=CC(=C1Cl)OC(C)C(=O)NC2=CC=CC=C2)Cl	1	3	3	2	Moderate	4.26637	In	10	0	NaN
412	Cloprop	CC(C(=O)O)OC1=CC(=CC=C1)Cl	1	3	3	2	Moderate	4.26637	In	10	0	NaN
414	Clopyralid	C1=CC(=NC(=C1Cl)C(=O)O)Cl	1	3	3	2	Moderate	4.26637	In	10	0	NaN
415	Clopyralid-olamine	C1=CC(=NC(=C1Cl)C(=O)O)Cl.C(CO)N	1	3	3	2	Moderate	4.26637	In	10	0	NaN
416	Cloquintocet-mexyl	CCCCCC(C)OC(=O)COC1=C2C(=C(C=C1)Cl)C=CC=N2	1	3	3	2	Moderate	4.26637	In	10	0	NaN
419	Cloxyfonac	C1=CC(=C(C=C1Cl)CO)OCC(=O)O	1	3	3	2	Moderate	4.26637	In	10	0	NaN
420	Cloxyfonac-sodium	C1=CC(=C(C=C1Cl)CO)OCC(=O)[O-]	1	3	3	2	Moderate	4.26637	In	10	0	NaN
422	Copper bis(3-phenylsalicylate)	C1=CC=C(C=C1)C2=C(C(=CC=C2)C(=O)[O-])[O-]	1	3	3	2	Moderate	4.26637	In	10	0	NaN
423	Copper II acetate	CC(=O)[O-].CC(=O)[O-]	1	3	3	2	Moderate	4.26637	In	10	0	NaN
424	Copper II carbonate	C(=O)([O-])[O-]	1	3	3	2	Moderate	4.26637	In	10	0	NaN
425	Copper II chloride	Cl[Cu]Cl	1	3	3	2	Moderate	4.26637	In	10	0	NaN
426	Copper naphthenate	CCC1CCC(CCC([O-])=O)CC1	1	3	3	2	Moderate	4.26637	In	10	0	NaN
427	Copper oxychloride	O(Cl)Cl	1	3	3	2	Moderate	4.26637	In	10	0	NaN
428	Copper sulphate	[O-]S(=O)(=O)[O-]	1	3	3	2	Moderate	4.26637	In	10	0	NaN
433	Coumethoxystrobin	CC1=C(C(=O)OC2=C1C=CC(=C2)OCC3=CC=CC=C3C(=COC)C(=O)OC)C	1	3	3	2	Moderate	4.26637	In	10	0	NaN
435	Coumoxystrobin	CCCCC1=C(C2=C(C=C(C=C2)OCC3=CC=CC=C3C(=COC)C(=O)OC)OC1=O)C	1	3	3	2	Moderate	4.26637	In	10	0	NaN
436	Credazine	CC1=CC=CC=C1OC2=NN=CC=C2	1	3	3	2	Moderate	4.26637	In	10	0	NaN
437	Crimidine	CC1=CC(=NC(=N1)Cl)N(C)C	1	3	3	2	Moderate	4.26637	In	10	0	NaN
439	Cumyluron	CC(C)(C1=CC=CC=C1)NC(=O)NCC2=CC=CC=C2Cl	1	3	3	2	Moderate	4.26637	In	10	0	NaN
440	Cyanamide	C(#N)N	1	3	3	2	Moderate	4.26637	In	10	0	NaN
441	Cyanatryn	CCNC1=NC(=NC(=N1)SC)NC(C)(C)C#N	1	3	3	2	Moderate	4.26637	In	10	0	NaN
442	Cyanazine	CCNC1=NC(=NC(=N1)Cl)NC(C)(C)C#N	1	3	3	2	Moderate	4.26637	In	10	0	NaN
445	Cyantraniliprole	CC1=CC(=CC(=C1NC(=O)C2=CC(=NN2C3=C(C=CC=N3)Cl)Br)C(=O)NC)C#N	1	3	3	2	Moderate	4.26637	In	10	0	NaN
446	Cyazofamid	CC1=CC=C(C=C1)C2=C(N=C(N2S(=O)(=O)N(C)C)C#N)Cl	1	3	3	2	Moderate	4.26637	In	10	0	NaN
447	Cybutryne	CC(C)(C)NC1=NC(=NC(=N1)NC2CC2)SC	1	3	3	2	Moderate	4.26637	In	10	0	NaN
448	Cyclanilide	C1CC1(C(=O)NC2=C(C=C(C=C2)Cl)Cl)C(=O)O	1	3	3	2	Moderate	4.26637	In	10	0	NaN
449	Cyclaniliprole	CC(C1CC1)NC(=O)C2=CC(=CC(=C2NC(=O)C3=CC(=NN3C4=C(C=CC=N4)Cl)Br)Br)Cl	1	3	3	2	Moderate	4.26637	In	10	0	NaN
451	Cycloate	CCN(C1CCCCC1)C(=O)SCC	1	3	3	2	Moderate	4.26637	In	10	0	NaN
452	Cyclohexanone	C1CCC(=O)CC1	1	3	3	2	Moderate	4.26637	In	10	0	NaN
453	Cycloheximide	CC1CC(C(=O)C(C1)C(CC2CC(=O)NC(=O)C2)O)C	1	3	3	2	Moderate	4.26637	In	10	0	NaN
454	Cycloprate	CCCCCCCCCCCCCCCCOC(=O)C1CC1	1	3	3	2	Moderate	4.26637	In	10	0	NaN
455	Cycloprothrin	CCOC1=CC=C(C=C1)C2(CC2(Cl)Cl)C(=O)OC(C#N)C3=CC(=CC=C3)OC4=CC=CC=C4	1	3	3	2	Moderate	4.26637	In	10	0	NaN
456	Cyclopyrimorate	CC1=CC=CC(=C1OC2=NN=C(C=C2OC(=O)N3CCOCC3)Cl)C4CC4	1	3	3	2	Moderate	4.26637	In	10	0	NaN
460	Cycluron	CN(C)C(=O)NC1CCCCCCC1	1	3	3	2	Moderate	4.26637	In	10	0	NaN
462	Cyflufenamid	C1CC1CONC(=NC(=O)CC2=CC=CC=C2)C3=C(C=CC(=C3F)F)C(F)(F)F	1	3	3	2	Moderate	4.26637	In	10	0	NaN
463	Cyflumetofen	CC(C)(C)C1=CC=C(C=C1)C(C#N)(C(=O)C2=CC=CC=C2C(F)(F)F)C(=O)OCCOC	1	3	3	2	Moderate	4.26637	In	10	0	NaN
465	Cyhalodiamide	CC1=C(C=CC(=C1)C(C(F)(F)F)(C(F)(F)F)F)NC(=O)C2=C(C(=CC=C2)Cl)C(=O)NC(C)(C)C#N	1	3	3	2	Moderate	4.26637	In	10	0	NaN
466	Cyhalofop	CC(C(=O)O)OC1=CC=C(C=C1)OC2=C(C=C(C=C2)C#N)F	1	3	3	2	Moderate	4.26637	In	10	0	NaN
467	Cyhalofop-butyl	CCCCOC(=O)C(C)OC1=CC=C(C=C1)OC2=C(C=C(C=C2)C#N)F	1	3	3	2	Moderate	4.26637	In	10	0	NaN
469	Cyhexatin	C1CCC(CC1)[Sn](C1CCCCC1)C1CCCCC1	1	3	3	2	Moderate	4.26637	In	10	0	NaN
470	Cymiazol	CC1=CC(=C(C=C1)N=C2N(C=CS2)C)C	1	3	3	2	Moderate	4.26637	In	10	0	NaN
471	Cymoxanil	CCNC(=O)NC(=O)C(=NOC)C#N	1	3	3	2	Moderate	4.26637	In	10	0	NaN
472	Cyometrinil	C1=CC=C(C=C1)C(=NOCC#N)C#N	1	3	3	2	Moderate	4.26637	In	10	0	NaN
473	Cypendazole	COC(=O)NC1=NC2=CC=CC=C2N1C(=O)NCCCCCC#N	1	3	3	2	Moderate	4.26637	In	10	0	NaN
475	Cyperquat	C[N+]1=CC=C(C=C1)C2=CC=CC=C2	1	3	3	2	Moderate	4.26637	In	10	0	NaN
476	Cyperquat iodide	C[n+]1ccc(cc1)c2ccccc2	1	3	3	2	Moderate	4.26637	In	10	0	NaN
478	Cyprazine	CC(C)NC1=NC(=NC(=N1)NC2CC2)Cl	1	3	3	2	Moderate	4.26637	In	10	0	NaN
479	Cyproconazole	CC(C1CC1)C(CN2C=NC=N2)(C3=CC=C(C=C3)Cl)O	1	3	3	2	Moderate	4.26637	In	10	0	NaN
480	Cyprodinil	CC1=NC(=NC(=C1)C2CC2)NC3=CC=CC=C3	1	3	3	2	Moderate	4.26637	In	10	0	NaN
481	Cyproflanilide	C1CC1CN(C2=CC=CC(=C2F)C(=O)NC3=C(C=C(C=C3Br)C(C(F)(F)F)(C(F)(F)F)F)C(F)(F)F)C(=O)C4=CC=C(C=C4)F	1	3	3	2	Moderate	4.26637	In	10	0	NaN
482	Cyprofuram	C1CC1C(=O)N(C2CCOC2=O)C3=CC(=CC=C3)Cl	1	3	3	2	Moderate	4.26637	In	10	0	NaN
483	Cypromid	C1CC1C(=O)NC2=CC(=C(C=C2)Cl)Cl	1	3	3	2	Moderate	4.26637	In	10	0	NaN
486	Cyromazine	C1CC1NC2=NC(=NC(=N2)N)N	1	3	3	2	Moderate	4.26637	In	10	0	NaN
488	Daimuron	CC1=CC=C(C=C1)NC(=O)NC(C)(C)C2=CC=CC=C2	1	3	3	2	Moderate	4.26637	In	10	0	NaN
489	Dalapon	CC(Cl)(Cl)C([O-])=O	1	3	3	2	Moderate	4.26637	In	10	0	NaN
490	Daminozide	CN(C)NC(=O)CCC(=O)O	1	3	3	2	Moderate	4.26637	In	10	0	NaN
491	Dazomet	CN1CN(C(=S)SC1)C	1	3	3	2	Moderate	4.26637	In	10	0	NaN
492	DCIP	CC(CCl)OC(C)CCl	1	3	3	2	Moderate	4.26637	In	10	0	NaN
493	DDD	C1=CC(=CC=C1C(C2=CC=C(C=C2)Cl)C(Cl)Cl)Cl	1	3	3	2	Moderate	4.26637	In	10	0	NaN
494	DDT	C1=CC(=CC=C1C(C2=CC=C(C=C2)Cl)C(Cl)(Cl)Cl)Cl	1	3	3	2	Moderate	4.26637	In	10	0	NaN
495	Debacarb	CCOCCOCCOC(=O)NC1=NC2=CC=CC=C2N1	1	3	3	2	Moderate	4.26637	In	10	0	NaN
496	Decafentin	CCCCCCCCCC[P+](C1=CC=CC=C1)(C1=CC=CC=C1)C1=CC=CC=C1	1	3	3	2	Moderate	4.26637	In	10	0	NaN
497	Defenuron	CNC(=O)NC1=CC=CC=C1	1	3	3	2	Moderate	4.26637	In	10	0	NaN
499	Delachlor	CC1=C(C(=CC=C1)C)N(COCC(C)C)C(=O)CCl	1	3	3	2	Moderate	4.26637	In	10	0	NaN
508	Denatonium benzoate	CC[N+](CC)(CC(=O)NC1=C(C)C=CC=C1C)CC1=CC=CC=C1	1	3	3	2	Moderate	4.26637	In	10	0	NaN
509	Desmedipham	CCOC(=O)NC1=CC(=CC=C1)OC(=O)NC2=CC=CC=C2	1	3	3	2	Moderate	4.26637	In	10	0	NaN
510	Desmetryn	CC(C)NC1=NC(=NC(=N1)NC)SC	1	3	3	2	Moderate	4.26637	In	10	0	NaN
512	Diafenthiuron	CC(C)C1=CC(=CC(=C1NC(=S)NC(C)(C)C)C(C)C)OC2=CC=CC=C2	1	3	3	2	Moderate	4.26637	In	10	0	NaN
515	Diamidaphos	CNP(=O)(NC)OC1=CC=CC=C1	1	3	3	2	Moderate	4.26637	In	10	0	NaN
517	Diammonium phosphate	OP(=O)([O-])[O-]	1	3	3	2	Moderate	4.26637	In	10	0	NaN
519	Dibromochloropropane	C(C(CBr)Br)Cl	1	3	3	2	Moderate	4.26637	In	10	0	NaN
520	Dibutyl phthalate	CCCCOC(=O)C1=CC=CC=C1C(=O)OCCCC	1	3	3	2	Moderate	4.26637	In	10	0	NaN
521	Dicamba	COC1=C(C=CC(=C1C(=O)O)Cl)Cl	1	3	3	2	Moderate	4.26637	In	10	0	NaN
522	Dicamba diglycolamine	COC1=C(C=CC(=C1C(=O)O)Cl)Cl.C(COCCO)N	1	3	3	2	Moderate	4.26637	In	10	0	NaN
523	Dicamba diolamine	COC1=C(Cl)C=CC(Cl)=C1C(O)=O	1	3	3	2	Moderate	4.26637	In	10	0	NaN
524	Dicamba methyl	COC1=C(C=CC(=C1C(=O)OC)Cl)Cl	1	3	3	2	Moderate	4.26637	In	10	0	NaN
525	Dichlobenil	C1=CC(=C(C(=C1)Cl)C#N)Cl	1	3	3	2	Moderate	4.26637	In	10	0	NaN
528	Dichlofluanid	CN(C)S(=O)(=O)N(C1=CC=CC=C1)SC(F)(Cl)Cl	1	3	3	2	Moderate	4.26637	In	10	0	NaN
531	Dichlorophen	C1=CC(=C(C=C1Cl)CC2=C(C=CC(=C2)Cl)O)O	1	3	3	2	Moderate	4.26637	In	10	0	NaN
532	Dichlorprop	CC(C(=O)O)OC1=C(C=C(C=C1)Cl)Cl	1	3	3	2	Moderate	4.26637	In	10	0	NaN
533	Dichlorprop-butotyl	CCCCOCCOC(=O)C(C)OC1=C(C=C(C=C1)Cl)Cl	1	3	3	2	Moderate	4.26637	In	10	0	NaN
534	Dichlorprop-dimethylammonium	CC(C(=O)O)OC1=C(C=C(C=C1)Cl)Cl.CNC	1	3	3	2	Moderate	4.26637	In	10	0	NaN
535	Dichlorprop-isoctyl	CCCCCCC(C)OC(=O)C(C)OC1=C(C=C(C=C1)Cl)Cl	1	3	3	2	Moderate	4.26637	In	10	0	NaN
536	Dichlorprop-methyl	CC(C(=O)OC)OC1=C(C=C(C=C1)Cl)Cl	1	3	3	2	Moderate	4.26637	In	10	0	NaN
537	Dichlorprop-P	CC(C(=O)O)OC1=C(C=C(C=C1)Cl)Cl	1	3	3	2	Moderate	4.26637	In	10	0	NaN
538	Dichlorprop-P-etexyl	CCCCC(CC)COC(=O)C(C)OC1=C(C=C(C=C1)Cl)Cl	1	3	3	2	Moderate	4.26637	In	10	0	NaN
539	Dichlorprop-isoctyl	CCCCCCC(C)OC(=O)C(C)OC1=C(C=C(C=C1)Cl)Cl	1	3	3	2	Moderate	4.26637	In	10	0	NaN
540	Dichlorprop-methyl	CC(C(=O)OC)OC1=C(C=C(C=C1)Cl)Cl	1	3	3	2	Moderate	4.26637	In	10	0	NaN
541	Dichlorprop-P	CC(C(=O)O)OC1=C(C=C(C=C1)Cl)Cl	1	3	3	2	Moderate	4.26637	In	10	0	NaN
542	Dichlorprop-P-etexyl	CCCCC(CC)COC(=O)C(C)OC1=C(C=C(C=C1)Cl)Cl	1	3	3	2	Moderate	4.26637	In	10	0	NaN
543	Dichlorvos	COP(=O)(OC)OC=C(Cl)Cl	1	3	3	2	Moderate	4.26637	In	10	0	NaN
544	Dichlozoline	CC1(C(=O)N(C(=O)O1)C2=CC(=CC(=C2)Cl)Cl)C	1	3	3	2	Moderate	4.26637	In	10	0	NaN
545	Diclobutrazol	CC(C)(C)C(C(CC1=C(C=C(C=C1)Cl)Cl)N2C=NC=N2)O.CC(C)(C)C(C(CC1=C(C=C(C=C1)Cl)Cl)N2C=NC=N2)O	1	3	3	2	Moderate	4.26637	In	10	0	NaN
546	Diclocymet	CC(C1=C(C=C(C=C1)Cl)Cl)NC(=O)C(C#N)C(C)(C)C	1	3	3	2	Moderate	4.26637	In	10	0	NaN
547	Diclofop	CC(C(=O)O)OC1=CC=C(C=C1)OC2=C(C=C(C=C2)Cl)Cl	1	3	3	2	Moderate	4.26637	In	10	0	NaN
548	Diclofop-methyl	CC(C(=O)OC)OC1=CC=C(C=C1)OC2=C(C=C(C=C2)Cl)Cl	1	3	3	2	Moderate	4.26637	In	10	0	NaN
550	Dicloran	C1=C(C=C(C(=C1Cl)N)Cl)[N+](=O)[O-]	1	3	3	2	Moderate	4.26637	In	10	0	NaN
553	Dicofol	C1=CC(=CC=C1C(C2=CC=C(C=C2)Cl)(C(Cl)(Cl)Cl)O)Cl	1	3	3	2	Moderate	4.26637	In	10	0	NaN
554	Dicopper carbonate dihydroxide	[O-]C([O-])=O	1	3	3	2	Moderate	4.26637	In	10	0	NaN
557	Dicyclonon	CC1(CN2C(=O)CCC2(N(C1)C(=O)C(Cl)Cl)C)C	1	3	3	2	Moderate	4.26637	In	10	0	NaN
559	Didecyldimethylammonium chloride	CCCCCCCCCC[N+](C)(C)CCCCCCCCCC	1	3	3	2	Moderate	4.26637	In	10	0	NaN
562	Diethatyl ethyl	CCC1=C(C(=CC=C1)CC)N(CC(=O)OCC)C(=O)CCl	1	3	3	2	Moderate	4.26637	In	10	0	NaN
563	Diethofencarb	CCOC1=C(C=C(C=C1)NC(=O)OC(C)C)OCC	1	3	3	2	Moderate	4.26637	In	10	0	NaN
565	Diethyltoluamide	CCN(CC)C(=O)C1=CC(=CC=C1)C	1	3	3	2	Moderate	4.26637	In	10	0	NaN
567	Difenoconazole	CC1COC(O1)(CN2C=NC=N2)C3=C(C=C(C=C3)OC4=CC=C(C=C4)Cl)Cl	1	3	3	2	Moderate	4.26637	In	10	0	NaN
570	Difenoxuron	CN(C)C(=O)NC1=CC=C(C=C1)OC2=CC=C(C=C2)OC	1	3	3	2	Moderate	4.26637	In	10	0	NaN
571	Difenzoquat	CN1C(=CC(=[N+]1C)C2=CC=CC=C2)C3=CC=CC=C3	1	3	3	2	Moderate	4.26637	In	10	0	NaN
572	Difenzoquat metilsulfate	CN1C(=CC(C2=CC=CC=C2)=[N+]1C)C1=CC=CC=C1	1	3	3	2	Moderate	4.26637	In	10	0	NaN
573	Difethialone	C1C(CC2=CC=CC=C2C1C3=C(SC4=CC=CC=C4C3=O)O)C5=CC=C(C=C5)C6=CC=C(C=C6)Br	1	3	3	2	Moderate	4.26637	In	10	0	NaN
574	Diflovidazin	C1=CC=C(C(=C1)C2=NN=C(N=N2)C3=C(C=CC=C3F)F)Cl	1	3	3	2	Moderate	4.26637	In	10	0	NaN
575	Diflubenzuron	C1=CC(=C(C(=C1)F)C(=O)NC(=O)NC2=CC=C(C=C2)Cl)F	1	3	3	2	Moderate	4.26637	In	10	0	NaN
576	Diflufenican	C1=CC(=CC(=C1)OC2=C(C=CC=N2)C(=O)NC3=C(C=C(C=C3)F)F)C(F)(F)F	1	3	3	2	Moderate	4.26637	In	10	0	NaN
577	Diflufenzopyr	CC(=NNC(=O)NC1=CC(=CC(=C1)F)F)C2=C(C=CC=N2)C(=O)O	1	3	3	2	Moderate	4.26637	In	10	0	NaN
578	Diflumetorim	CCC(C1=CC=C(C=C1)OC(F)F)NC2=NC=NC(=C2Cl)C	1	3	3	2	Moderate	4.26637	In	10	0	NaN
580	Dimefox	CN(C)P(=O)(N(C)C)F	1	3	3	2	Moderate	4.26637	In	10	0	NaN
581	Dimefuron	CC(C)(C)C1=NN(C(=O)O1)C2=C(C=C(C=C2)NC(=O)N(C)C)Cl	1	3	3	2	Moderate	4.26637	In	10	0	NaN
582	Dimepiperate	CC(C)(C1=CC=CC=C1)SC(=O)N2CCCCC2	1	3	3	2	Moderate	4.26637	In	10	0	NaN
583	Dimetachlone	C1CC(=O)N(C1=O)C2=CC(=CC(=C2)Cl)Cl	1	3	3	2	Moderate	4.26637	In	10	0	NaN
584	Dimethachlor	CC1=C(C(=CC=C1)C)N(CCOC)C(=O)CCl	1	3	3	2	Moderate	4.26637	In	10	0	NaN
585	Dimethametryn	CCNC1=NC(=NC(=N1)SC)NC(C)C(C)C	1	3	3	2	Moderate	4.26637	In	10	0	NaN
593	Dimethyl disulfide	CSSC	1	3	3	2	Moderate	4.26637	In	10	0	NaN
594	Dimethyl phthalate	COC(=O)C1=CC=CC=C1C(=O)OC	1	3	3	2	Moderate	4.26637	In	10	0	NaN
599	Dimoxystrobin	CC1=CC(=C(C=C1)C)OCC2=CC=CC=C2C(=NOC)C(=O)NC	1	3	3	2	Moderate	4.26637	In	10	0	NaN
600	Dinex	C1CCC(CC1)C2=CC(=CC(=C2O)[N+](=O)[O-])[N+](=O)[O-]	1	3	3	2	Moderate	4.26637	In	10	0	NaN
601	Dinex-diclexine	OC1=C(C=C(C=C1C1CCCCC1)[N+]([O-])=O)[N+]([O-])=O	1	3	3	2	Moderate	4.26637	In	10	0	NaN
604	Dinitramine	CCN(CC)C1=C(C=C(C(=C1[N+](=O)[O-])N)C(F)(F)F)[N+](=O)[O-]	1	3	3	2	Moderate	4.26637	In	10	0	NaN
605	Dinobuton	CCC(C)C1=CC(=CC(=C1OC(=O)OC(C)C)[N+](=O)[O-])[N+](=O)[O-]	1	3	3	2	Moderate	4.26637	In	10	0	NaN
607	Dinocton	CC(C)CCCCCC1=CC(=CC(=C1OC(=O)OC)[N+](=O)[O-])[N+](=O)[O-]	1	3	3	2	Moderate	4.26637	In	10	0	NaN
608	Dinofenate	CCC(C)C1=CC(=CC(=C1OC(=O)OC2=C(C=C(C=C2)[N+](=O)[O-])[N+](=O)[O-])[N+](=O)[O-])[N+](=O)[O-]	1	3	3	2	Moderate	4.26637	In	10	0	NaN
609	Dinopenton	CCCC(C)C1=CC(=CC(=C1OC(=O)OC(C)C)[N+](=O)[O-])[N+](=O)[O-]	1	3	3	2	Moderate	4.26637	In	10	0	NaN
610	Dinosam	CCCC(C)C1=CC(=CC(=C1O)[N+](=O)[O-])[N+](=O)[O-]	1	3	3	2	Moderate	4.26637	In	10	0	NaN
611	Dinoseb acetate	CCC(C)C1=CC(=CC(=C1OC(=O)C)[N+](=O)[O-])[N+](=O)[O-]	1	3	3	2	Moderate	4.26637	In	10	0	NaN
613	Dinotefuran	CN=C(NCC1CCOC1)N[N+](=O)[O-]	1	3	3	2	Moderate	4.26637	In	10	0	NaN
614	Dinoterb	CC(C)(C)C1=CC(=CC(=C1O)[N+](=O)[O-])[N+](=O)[O-]	1	3	3	2	Moderate	4.26637	In	10	0	NaN
615	Dinoterb acetate	CC(=O)OC1=C(C=C(C=C1[N+](=O)[O-])[N+](=O)[O-])C(C)(C)C	1	3	3	2	Moderate	4.26637	In	10	0	NaN
616	Diofenolan	CCC1OCC(O1)COC2=CC=C(C=C2)OC3=CC=CC=C3	1	3	3	2	Moderate	4.26637	In	10	0	NaN
619	Diphacinone	C1=CC=C(C=C1)C(C2=CC=CC=C2)C(=O)C3C(=O)C4=CC=CC=C4C3=O	1	3	3	2	Moderate	4.26637	In	10	0	NaN
621	Diphenamid	CN(C)C(=O)C(C1=CC=CC=C1)C2=CC=CC=C2	1	3	3	2	Moderate	4.26637	In	10	0	NaN
622	Diphenylamine	C1=CC=C(C=C1)NC2=CC=CC=C2	1	3	3	2	Moderate	4.26637	In	10	0	NaN
623	Dipotassium phosphonate	OP([O-])[O-]	1	3	3	2	Moderate	4.26637	In	10	0	NaN
624	Dipropalin	CCCN(CCC)C1=C(C=C(C=C1[N+](=O)[O-])C)[N+](=O)[O-]	1	3	3	2	Moderate	4.26637	In	10	0	NaN
625	Dipropetryn	CCSC1=NC(=NC(=N1)NC(C)C)NC(C)C	1	3	3	2	Moderate	4.26637	In	10	0	NaN
627	Dipyrithione	C1=CC=[N+](C(=C1)SSC2=CC=CC=[N+]2[O-])[O-]	1	3	3	2	Moderate	4.26637	In	10	0	NaN
628	Diquat	C1C[N+]2=CC=CC=C2C3=CC=CC=[N+]31	1	3	3	2	Moderate	4.26637	In	10	0	NaN
629	Diquat dichloride	C[As](=O)([O-])[O-]	1	3	3	2	Moderate	4.26637	In	10	0	NaN
630	Disodium phosphonate	P([O-])([O-])=O	1	3	3	2	Moderate	4.26637	In	10	0	NaN
631	Disul	C1=CC(=C(C=C1Cl)Cl)OCCOS(=O)(=O)O	1	3	3	2	Moderate	4.26637	In	10	0	NaN
634	Disul-sodium	C1=CC(=C(C=C1Cl)Cl)OCCOS(=O)(=O)[O-]	1	3	3	2	Moderate	4.26637	In	10	0	NaN
637	Dithiopyr	CC(C)CC1=C(C(=NC(=C1C(=O)SC)C(F)(F)F)C(F)F)C(=O)SC	1	3	3	2	Moderate	4.26637	In	10	0	NaN
638	Diuron	CN(C)C(=O)NC1=CC(=C(C=C1)Cl)Cl	1	3	3	2	Moderate	4.26637	In	10	0	NaN
640	DNOC	CC1=CC(=CC(=C1O)[N+](=O)[O-])[N+](=O)[O-]	1	3	3	2	Moderate	4.26637	In	10	0	NaN
641	Dodecylphenol ethoxylate	CCCCOCCOCCO	1	3	3	2	Moderate	4.26637	In	10	0	NaN
642	Dodemorph	CC1CN(CC(O1)C)C2CCCCCCCCCCC2	1	3	3	2	Moderate	4.26637	In	10	0	NaN
643	Dodine	CCCCCCCCCCCCN=C(N)N	1	3	3	2	Moderate	4.26637	In	10	0	NaN
644	Drazoxolon	CC1=NOC(=O)C1=NNC2=CC=CC=C2Cl	1	3	3	2	Moderate	4.26637	In	10	0	NaN
646	Ecolyst	CC[NH+](CC)CCOCC1=CC=C(C=C1)C.	1	3	3	2	Moderate	4.26637	In	10	0	NaN
648	Eglinazine	CCNC1=NC(=NC(=N1)Cl)NCC(=O)O	1	3	3	2	Moderate	4.26637	In	10	0	NaN
649	Eglinazine-ethyl	CCNC1=NC(=NC(=N1)NCC(=O)OCC)Cl	1	3	3	2	Moderate	4.26637	In	10	0	NaN
652	Endothal	C1CC2C(C(C1O2)C(=O)O)C(=O)O	1	3	3	2	Moderate	4.26637	In	10	0	NaN
657	Epichlorohydrin	C1C(O1)CCl	1	3	3	2	Moderate	4.26637	In	10	0	NaN
659	Epocholeone	CC[C@H]([C@@H]1[C@H](O1)[C@@H](C)[C@H]2CC[C@@H]3[C@@]2(CC[C@H]4[C@H]3COC(=O)[C@@H]5[C@@]4(C[C@H]([C@H](C5)OC(=O)CC)OC(=O)CC)C)C)C(C)C	1	3	3	2	Moderate	4.26637	In	10	0	NaN
660	Epofenonane	CCC1=CC=C(C=C1)OCCC(CC)CCC2C(O2)(C)CC	1	3	3	2	Moderate	4.26637	In	10	0	NaN
661	Epoxiconazole	C1=CC=C(C(=C1)C2C(O2)(CN3C=NC=N3)C4=CC=C(C=C4)F)Cl	1	3	3	2	Moderate	4.26637	In	10	0	NaN
663	EPTC	CCCN(CCC)C(=O)SCC	1	3	3	2	Moderate	4.26637	In	10	0	NaN
665	Erbon	CC(C(=O)OCCOC1=CC(=C(C=C1Cl)Cl)Cl)(Cl)Cl	1	3	3	2	Moderate	4.26637	In	10	0	NaN
666	Esfenvalerate	CC(C)C(C1=CC=C(C=C1)Cl)C(=O)OC(C#N)C2=CC(=CC=C2)OC3=CC=CC=C3	1	3	3	2	Moderate	4.26637	In	10	0	NaN
667	Esprocarb	CCN(C(C)C(C)C)C(=O)SCC1=CC=CC=C1	1	3	3	2	Moderate	4.26637	In	10	0	NaN
668	Etacelasil	COCCO[Si](CCCl)(OCCOC)OCCOC	1	3	3	2	Moderate	4.26637	In	10	0	NaN
669	Etaconazole	CCC1COC(O1)(CN2C=NC=N2)C3=C(C=C(C=C3)Cl)Cl	1	3	3	2	Moderate	4.26637	In	10	0	NaN
671	Etem	C1CN2C(=N1)SSC2=S	1	3	3	2	Moderate	4.26637	In	10	0	NaN
673	Ethalfluralin	CCN(CC(=C)C)C1=C(C=C(C=C1[N+](=O)[O-])C(F)(F)F)[N+](=O)[O-]	1	3	3	2	Moderate	4.26637	In	10	0	NaN
675	Ethanedial	C(=O)C=O	1	3	3	2	Moderate	4.26637	In	10	0	NaN
676	Ethanethiol	CCS	1	3	3	2	Moderate	4.26637	In	10	0	NaN
677	Ethanol	CCO	1	3	3	2	Moderate	4.26637	In	10	0	NaN
678	Ethephon	C(CCl)P(=O)(O)O	1	3	3	2	Moderate	4.26637	In	10	0	NaN
679	Ethidimuron	CCS(=O)(=O)C1=NN=C(S1)N(C)C(=O)NC	1	3	3	2	Moderate	4.26637	In	10	0	NaN
680	Ethiofencarb	CCSCC1=CC=CC=C1OC(=O)NC	1	3	3	2	Moderate	4.26637	In	10	0	NaN
681	Ethiolate	CCN(CC)C(=O)SCC	1	3	3	2	Moderate	4.26637	In	10	0	NaN
683	Ethiozin	CCSC1=NN=C(C(=O)N1N)C(C)(C)C	1	3	3	2	Moderate	4.26637	In	10	0	NaN
684	Ethiprole	CCS(=O)C1=C(N(N=C1C#N)C2=C(C=C(C=C2Cl)C(F)(F)F)Cl)N	1	3	3	2	Moderate	4.26637	In	10	0	NaN
687	Ethofumesate	CCOC1C(C2=C(O1)C=CC(=C2)OS(=O)(=O)C)(C)C	1	3	3	2	Moderate	4.26637	In	10	0	NaN
688	Ethohexadiol	CCCC(C(CC)CO)O	1	3	3	2	Moderate	4.26637	In	10	0	NaN
690	Ethoxyfen	CC(C(=O)O)OC(=O)C1=C(C=CC(=C1)OC2=C(C=C(C=C2)C(F)(F)F)Cl)Cl	1	3	3	2	Moderate	4.26637	In	10	0	NaN
691	Ethoxyfen-ethyl	CCOC(=O)C(C)OC(=O)C1=C(C=CC(=C1)OC2=C(C=C(C=C2)C(F)(F)F)Cl)Cl	1	3	3	2	Moderate	4.26637	In	10	0	NaN
692	Ethoxylated p-nonylphenol	c1(ccc(OCCOCCO)cc1)CCCCCCCCC	1	3	3	2	Moderate	4.26637	In	10	0	NaN
695	Ethyl butyl nitrosamine	CCCCN(CC)N=O	1	3	3	2	Moderate	4.26637	In	10	0	NaN
696	Ethyl formate	CCOC=O	1	3	3	2	Moderate	4.26637	In	10	0	NaN
697	Ethylchlozate	CCOC(=O)CC1=C2C=C(C=CC2=NN1)Cl	1	3	3	2	Moderate	4.26637	In	10	0	NaN
698	Ethyl-DDD	CCC1=CC=C(C=C1)C(C2=CC=C(C=C2)CC)C(Cl)Cl	1	3	3	2	Moderate	4.26637	In	10	0	NaN
699	Ethylene dichloride	C(CCl)Cl	1	3	3	2	Moderate	4.26637	In	10	0	NaN
700	Ethylene glycol	C(CO)O	1	3	3	2	Moderate	4.26637	In	10	0	NaN
701	Ethylene urea	C1CNC(=O)N1	1	3	3	2	Moderate	4.26637	In	10	0	NaN
702	Ethylenediamine tetraacetic acid	C(CN(CC(=O)O)CC(=O)O)N(CC(=O)O)CC(=O)O	1	3	3	2	Moderate	4.26637	In	10	0	NaN
703	Ethylicin	CCSS(=O)(=O)CC	1	3	3	2	Moderate	4.26637	In	10	0	NaN
704	Ethylmercury bromide	C[CH2]	1	3	3	2	Moderate	4.26637	In	10	0	NaN
705	Etinofen	CCOCC1=CC(=CC(=C1O)[N+](=O)[O-])[N+](=O)[O-]	1	3	3	2	Moderate	4.26637	In	10	0	NaN
706	Etofenprox	CCOC1=CC=C(C=C1)C(C)(C)COCC2=CC(=CC=C2)OC3=CC=CC=C3	1	3	3	2	Moderate	4.26637	In	10	0	NaN
707	Etoxazole	CCOC1=C(C=CC(=C1)C(C)(C)C)C2COC(=N2)C3=C(C=CC=C3F)F	1	3	3	2	Moderate	4.26637	In	10	0	NaN
708	Etridiazole	CCOC1=NC(=NS1)C(Cl)(Cl)Cl	1	3	3	2	Moderate	4.26637	In	10	0	NaN
710	Famoxadone	CC1(C(=O)N(C(=O)O1)NC2=CC=CC=C2)C3=CC=C(C=C3)OC4=CC=CC=C4	1	3	3	2	Moderate	4.26637	In	10	0	NaN
711	Fenamidone	CC1(C(=O)N(C(=N1)SC)NC2=CC=CC=C2)C3=CC=CC=C3	1	3	3	2	Moderate	4.26637	In	10	0	NaN
712	Fenaminosulf	CN(C)C1=CC=C(C=C1)N=NS(=O)(=O)[O-]	1	3	3	2	Moderate	4.26637	In	10	0	NaN
715	Fenapanil	CCCCC(CN1C=CN=C1)(C#N)C2=CC=CC=C2	1	3	3	2	Moderate	4.26637	In	10	0	NaN
716	Fenarimol	C1=CC=C(C(=C1)C(C2=CC=C(C=C2)Cl)(C3=CN=CN=C3)O)Cl	1	3	3	2	Moderate	4.26637	In	10	0	NaN
718	Fenazaflor	C1=CC=C(C=C1)OC(=O)N2C3=CC(=C(C=C3N=C2C(F)(F)F)Cl)Cl	1	3	3	2	Moderate	4.26637	In	10	0	NaN
719	Fenazaquin	CC(C)(C)C1=CC=C(C=C1)CCOC2=NC=NC3=CC=CC=C32	1	3	3	2	Moderate	4.26637	In	10	0	NaN
720	Fenbuconazole	C1=CC=C(C=C1)C(CCC2=CC=C(C=C2)Cl)(CN3C=NC=N3)C#N	1	3	3	2	Moderate	4.26637	In	10	0	NaN
721	Fenbutatin oxide	CC(C)(C[Sn](CC(C)(C)C1=CC=CC=C1)(CC(C)(C)C2=CC=CC=C2)O[Sn](CC(C)(C)C3=CC=CC=C3)(CC(C)(C)C4=CC=CC=C4)CC(C)(C)C5=CC=CC=C5)C6=CC=CC=C6	1	3	3	2	Moderate	4.26637	In	10	0	NaN
722	Fenchlorazole	C1=CC(=C(C=C1Cl)Cl)N2C(=NC(=N2)C(=O)O)C(Cl)(Cl)Cl	1	3	3	2	Moderate	4.26637	In	10	0	NaN
723	Fenchlorazole-ethyl	C1=CC=C(C=C1)OC(=O)N2C3=CC(=C(C=C3N=C2C(F)(F)F)Cl)Cl	1	3	3	2	Moderate	4.26637	In	10	0	NaN
725	Fenclorim	C1=CC=C(C=C1)C2=NC(=CC(=N2)Cl)Cl	1	3	3	2	Moderate	4.26637	In	10	0	NaN
726	Fenethacarb	CCC1=CC(=CC(=C1)OC(=O)NC)CC	1	3	3	2	Moderate	4.26637	In	10	0	NaN
728	Fenfuram	CC1=C(C=CO1)C(=O)NC2=CC=CC=C2	1	3	3	2	Moderate	4.26637	In	10	0	NaN
729	Fenhexamid	CC1(CCCCC1)C(=O)NC2=C(C(=C(C=C2)O)Cl)Cl	1	3	3	2	Moderate	4.26637	In	10	0	NaN
730	Fenitropan	CC(=O)OCC(C(C1=CC=CC=C1)OC(=O)C)[N+](=O)[O-]	1	3	3	2	Moderate	4.26637	In	10	0	NaN
733	Fenobucarb	CCC(C)C1=CC=CC=C1OC(=O)NC	1	3	3	2	Moderate	4.26637	In	10	0	NaN
734	Fenoprop	CC(C(=O)O)OC1=CC(=C(C=C1Cl)Cl)Cl	1	3	3	2	Moderate	4.26637	In	10	0	NaN
735	Fenoprop-butometyl	CCCCOCC(C)OC(=O)C(C)OC1=CC(=C(C=C1Cl)Cl)Cl	1	3	3	2	Moderate	4.26637	In	10	0	NaN
736	Fenoprop-butotyl	CCCCOCCOC(=O)C(C)OC1=CC(=C(C=C1Cl)Cl)Cl	1	3	3	2	Moderate	4.26637	In	10	0	NaN
737	Fenoprop-butyl	CCCCOC(=O)C(C)OC1=CC(=C(C=C1Cl)Cl)Cl	1	3	3	2	Moderate	4.26637	In	10	0	NaN
738	Fenoprop-isoctyl	CC(C)CCCCCOC(=O)C(C)OC1=CC(=C(C=C1Cl)Cl)Cl	1	3	3	2	Moderate	4.26637	In	10	0	NaN
739	Fenoprop-methyl	CC(C(=O)OC)OC1=CC(=C(C=C1Cl)Cl)Cl	1	3	3	2	Moderate	4.26637	In	10	0	NaN
740	Fenoprop-potassium	CC(C(=O)[O-])OC1=CC(=C(C=C1Cl)Cl)Cl	1	3	3	2	Moderate	4.26637	In	10	0	NaN
742	Fenoxanil	CC(C)C(C)(C#N)NC(=O)C(C)OC1=C(C=C(C=C1)Cl)Cl	1	3	3	2	Moderate	4.26637	In	10	0	NaN
743	Fenoxaprop-ethyl	CCOC(=O)C(C)OC1=CC=C(C=C1)OC2=NC3=C(O2)C=C(C=C3)Cl	1	3	3	2	Moderate	4.26637	In	10	0	NaN
744	Fenoxaprop-P	CC(C(=O)O)OC1=CC=C(C=C1)OC2=NC3=C(O2)C=C(C=C3)Cl	1	3	3	2	Moderate	4.26637	In	10	0	NaN
745	Fenoxaprop-P-ethyl	CCOC(=O)C(C)OC1=CC=C(C=C1)OC2=NC3=C(O2)C=C(C=C3)Cl	1	3	3	2	Moderate	4.26637	In	10	0	NaN
746	Fenoxasulfone	CCOC1=C(C=C(C(=C1)Cl)CS(=O)(=O)C2=NOC(C2)(C)C)Cl	1	3	3	2	Moderate	4.26637	In	10	0	NaN
747	Fenoxycarb	CCOC(=O)NCCOC1=CC=C(C=C1)OC2=CC=CC=C2	1	3	3	2	Moderate	4.26637	In	10	0	NaN
748	Fenpiclonil	C1=CC(=C(C(=C1)Cl)Cl)C2=CNC=C2C#N	1	3	3	2	Moderate	4.26637	In	10	0	NaN
749	Fenpicoxamid	CC1C(C(C(=O)OCC(C(=O)O1)NC(=O)C2=NC=CC(=C2OCOC(=O)C(C)C)OC)CC3=CC=CC=C3)OC(=O)C(C)C	1	3	3	2	Moderate	4.26637	In	10	0	NaN
751	Fenpropathrin	CC1(C(C1(C)C)C(=O)OC(C#N)C2=CC(=CC=C2)OC3=CC=CC=C3)C	1	3	3	2	Moderate	4.26637	In	10	0	NaN
752	Fenpropidin	CC(CC1=CC=C(C=C1)C(C)(C)C)CN2CCCCC2	1	3	3	2	Moderate	4.26637	In	10	0	NaN
753	Fenpropimorph	CC1CN(CC(O1)C)CC(C)CC2=CC=C(C=C2)C(C)(C)C	1	3	3	2	Moderate	4.26637	In	10	0	NaN
755	Fenpyrazone	CCN1C(=C(C=N1)C(=O)C2=C(C(=C(C=C2)S(=O)(=O)C)COCC(F)(F)F)Cl)OC(=O)C3=CN(N=C3C)C	1	3	3	2	Moderate	4.26637	In	10	0	NaN
756	Fenpyroximate	CC1=NN(C(=C1C=NOCC2=CC=C(C=C2)C(=O)OC(C)(C)C)OC3=CC=CC=C3)C	1	3	3	2	Moderate	4.26637	In	10	0	NaN
757	Fenquinotrione	COC1=CC=C(C=C1)N2C3=C(C(=CC=C3)Cl)N=C(C2=O)C(=O)C4C(=O)CCCC4=O	1	3	3	2	Moderate	4.26637	In	10	0	NaN
760	Fenson	C1=CC=C(C=C1)S(=O)(=O)OC2=CC=C(C=C2)Cl	1	3	3	2	Moderate	4.26637	In	10	0	NaN
762	Fenthiaprop	CC(C(=O)O)OC1=CC=C(C=C1)OC2=NC3=C(S2)C=C(C=C3)Cl	1	3	3	2	Moderate	4.26637	In	10	0	NaN
763	Fenthiaprop ethyl	COC(=O)C(C)OC1=CC=C(C=C1)OC2=NC3=C(S2)C=C(C=C3)Cl	1	3	3	2	Moderate	4.26637	In	10	0	NaN
767	Fentin acetate	CC(=O)O[Sn](C1=CC=CC=C1)(C2=CC=CC=C2)C3=CC=CC=C3	1	3	3	2	Moderate	4.26637	In	10	0	NaN
768	Fentin chloride	C1=CC=C(C=C1)[Sn](C2=CC=CC=C2)(C3=CC=CC=C3)Cl	1	3	3	2	Moderate	4.26637	In	10	0	NaN
769	Fentin hydroxide	C1=CC=C(C=C1)[Sn](C1=CC=CC=C1)C1=CC=CC=C1	1	3	3	2	Moderate	4.26637	In	10	0	NaN
770	Fentrazamide	CCN(C1CCCCC1)C(=O)N2C(=O)N(N=N2)C3=CC=CC=C3Cl	1	3	3	2	Moderate	4.26637	In	10	0	NaN
771	Fenuron	CN(C)C(=O)NC1=CC=CC=C1	1	3	3	2	Moderate	4.26637	In	10	0	NaN
772	Fenuron-TCA	C[NH+](C)C(=O)NC1=CC=CC=C1	1	3	3	2	Moderate	4.26637	In	10	0	NaN
773	Fenvalerate	CC(C)C(C1=CC=C(C=C1)Cl)C(=O)OC(C#N)C2=CC(=CC=C2)OC3=CC=CC=C3	1	3	3	2	Moderate	4.26637	In	10	0	NaN
774	Ferbam	CN(C)C([S-])=S	1	3	3	2	Moderate	4.26637	In	10	0	NaN
775	Ferimzone	CC1=CC=CC=C1C(=NNC2=NC(=CC(=N2)C)C)C	1	3	3	2	Moderate	4.26637	In	10	0	NaN
776	Ferric phosphate	[O-]P(=O)([O-])[O-]	1	3	3	2	Moderate	4.26637	In	10	0	NaN
777	Fipronil	C1=C(C=C(C(=C1Cl)N2C(=C(C(=N2)C#N)S(=O)C(F)(F)F)N)Cl)C(F)(F)F	1	3	3	2	Moderate	4.26637	In	10	0	NaN
778	Flamprop	CC(C(=O)O)N(C1=CC(=C(C=C1)F)Cl)C(=O)C2=CC=CC=C2	1	3	3	2	Moderate	4.26637	In	10	0	NaN
779	Flamprop-isopropyl	CC(C)OC(=O)C(C)N(C1=CC(=C(C=C1)F)Cl)C(=O)C2=CC=CC=C2	1	3	3	2	Moderate	4.26637	In	10	0	NaN
780	Flamprop-methyl	CC(C(=O)OC)N(C1=CC(=C(C=C1)F)Cl)C(=O)C2=CC=CC=C2	1	3	3	2	Moderate	4.26637	In	10	0	NaN
781	Flamprop-M-isopropyl	CC(C)OC(=O)C(C)N(C1=CC(=C(C=C1)F)Cl)C(=O)C2=CC=CC=C2	1	3	3	2	Moderate	4.26637	In	10	0	NaN
782	Flamprop-M-methyl	CC(C(=O)OC)N(C1=CC(=C(C=C1)F)Cl)C(=O)C2=CC=CC=C2	1	3	3	2	Moderate	4.26637	In	10	0	NaN
785	Flometoquin	CCC1=NC2=CC(=C(C=C2C(=C1C)OC(=O)OC)OC3=CC=C(C=C3)OC(F)(F)F)C	1	3	3	2	Moderate	4.26637	In	10	0	NaN
786	Flonicamid	C1=CN=CC(=C1C(F)(F)F)C(=O)NCC#N	1	3	3	2	Moderate	4.26637	In	10	0	NaN
788	Florpyrauxifen	COC1=C(C=CC(=C1F)C2=NC(=C(C(=C2F)N)Cl)C(=O)O)Cl	1	3	3	2	Moderate	4.26637	In	10	0	NaN
789	Florpyrauxifen-benzyl	COC1=C(C=CC(=C1F)C2=NC(=C(C(=C2F)N)Cl)C(=O)OCC3=CC=CC=C3)Cl	1	3	3	2	Moderate	4.26637	In	10	0	NaN
790	Florylpicoxamid	CC(C(C1=CC=C(C=C1)F)C2=CC=C(C=C2)F)OC(=O)C(C)NC(=O)C3=NC=CC(=C3OC(=O)C)OC	1	3	3	2	Moderate	4.26637	In	10	0	NaN
791	Fluacrypyrim	CC(C)OC1=NC(=CC(=N1)OCC2=CC=CC=C2C(=COC)C(=O)OC)C(F)(F)F	1	3	3	2	Moderate	4.26637	In	10	0	NaN
793	Fluazifop	CC(C(=O)O)OC1=CC=C(C=C1)OC2=NC=C(C=C2)C(F)(F)F	1	3	3	2	Moderate	4.26637	In	10	0	NaN
794	Fluazifop-butyl	CCCCOC(=O)C(C)OC1=CC=C(C=C1)OC2=NC=C(C=C2)C(F)(F)F	1	3	3	2	Moderate	4.26637	In	10	0	NaN
795	Fluazifop-P	CC(C(=O)O)OC1=CC=C(C=C1)OC2=NC=C(C=C2)C(F)(F)F	1	3	3	2	Moderate	4.26637	In	10	0	NaN
796	Fluazifop-P-butyl	CCCCOC(=O)C(C)OC1=CC=C(C=C1)OC2=NC=C(C=C2)C(F)(F)F	1	3	3	2	Moderate	4.26637	In	10	0	NaN
797	Fluazinam	C1=C(C=NC(=C1Cl)NC2=C(C=C(C(=C2[N+](=O)[O-])Cl)C(F)(F)F)[N+](=O)[O-])C(F)(F)F	1	3	3	2	Moderate	4.26637	In	10	0	NaN
798	Fluazolate	CC(C)OC(=O)C1=C(C=C(C(=C1)C2=NN(C(=C2Br)C(F)(F)F)C)F)Cl	1	3	3	2	Moderate	4.26637	In	10	0	NaN
800	Flubeneteram	CN1C=C(C(=N1)C(F)F)C(=O)NC2=CC=CC=C2OC3=C(C=C(C=C3)C(F)(F)F)Cl	1	3	3	2	Moderate	4.26637	In	10	0	NaN
801	Flubenzimine	C1=CC=C(C=C1)N=C2N(C(=NC(F)(F)F)C(=NC(F)(F)F)S2)C3=CC=CC=C3	1	3	3	2	Moderate	4.26637	In	10	0	NaN
805	Fluchloralin	CCCN(CCCl)C1=C(C=C(C=C1[N+](=O)[O-])C(F)(F)F)[N+](=O)[O-]	1	3	3	2	Moderate	4.26637	In	10	0	NaN
806	Fluchloraminopyr	CC(C(=O)O)OC1=NC(=C(C(=C1Cl)N)Cl)F	1	3	3	2	Moderate	4.26637	In	10	0	NaN
807	Fluchloraminopyr-tefuryl	CC(C(=O)OCC1CCCO1)OC2=NC(=C(C(=C2Cl)N)Cl)F	1	3	3	2	Moderate	4.26637	In	10	0	NaN
808	Fluchlordiniliprole	CNC(=O)C1=C(C(=CC(=C1F)Cl)Cl)NC(=O)C2=CC(=NN2C3=C(C=CC=N3)Cl)Br	1	3	3	2	Moderate	4.26637	In	10	0	NaN
809	Flucofuron	C1=CC(=C(C=C1NC(=O)NC2=CC(=C(C=C2)Cl)C(F)(F)F)C(F)(F)F)Cl	1	3	3	2	Moderate	4.26637	In	10	0	NaN
810	Flucycloxuron	C1CC1C(=NOCC2=CC=C(C=C2)NC(=O)NC(=O)C3=C(C=CC=C3F)F)C4=CC=C(C=C4)Cl	1	3	3	2	Moderate	4.26637	In	10	0	NaN
811	Flucythrinate	CC(C)C(C1=CC=C(C=C1)OC(F)F)C(=O)OC(C#N)C2=CC(=CC=C2)OC3=CC=CC=C3	1	3	3	2	Moderate	4.26637	In	10	0	NaN
812	Fludioxonil	C1=CC(=C2C(=C1)OC(O2)(F)F)C3=CNC=C3C#N	1	3	3	2	Moderate	4.26637	In	10	0	NaN
813	Fluenetil	C1=CC=C(C=C1)C2=CC=C(C=C2)CC(=O)OCCF	1	3	3	2	Moderate	4.26637	In	10	0	NaN
816	Flufenerim	CC(C1=C(C(=NC=N1)NCCC2=CC=C(C=C2)OC(F)(F)F)Cl)F	1	3	3	2	Moderate	4.26637	In	10	0	NaN
817	Flufenoxadiazam	C1=CC=C(C(=C1)NC(=O)C2=CC=C(C=C2)C3=NOC(=N3)C(F)(F)F)F	1	3	3	2	Moderate	4.26637	In	10	0	NaN
818	Flufenoxuron	C1=CC(=C(C(=C1)F)C(=O)NC(=O)NC2=C(C=C(C=C2)OC3=C(C=C(C=C3)C(F)(F)F)Cl)F)F	1	3	3	2	Moderate	4.26637	In	10	0	NaN
819	Flufenoxystrobin	COC=C(C1=CC=CC=C1COC2=C(C=C(C=C2)C(F)(F)F)Cl)C(=O)OC	1	3	3	2	Moderate	4.26637	In	10	0	NaN
820	Flufenprox	CCOC1=CC=C(C=C1)C(COCC2=CC(=CC=C2)OC3=CC=C(C=C3)Cl)C(F)(F)F	1	3	3	2	Moderate	4.26637	In	10	0	NaN
821	Flufenpyr	CC1=C(C=NN(C1=O)C2=CC(=C(C=C2F)Cl)OCC(=O)O)C(F)(F)F	1	3	3	2	Moderate	4.26637	In	10	0	NaN
822	Flufenpyr-ethyl	CCOC(=O)COC1=C(C=C(C(=C1)N2C(=O)C(=C(C=N2)C(F)(F)F)C)F)Cl	1	3	3	2	Moderate	4.26637	In	10	0	NaN
823	Flufiprole	CC(=C)CNC1=C(C(=NN1C2=C(C=C(C=C2Cl)C(F)(F)F)Cl)C#N)S(=O)C(F)(F)F	1	3	3	2	Moderate	4.26637	In	10	0	NaN
824	Fluindapyr	CC1CC(C)(C)c2c(ccc(c12)N=C(c3cn(C)nc3C(F)F)O)F	1	3	3	2	Moderate	4.26637	In	10	0	NaN
825	Flumetralin	CCN(CC1=C(C=CC=C1Cl)F)C2=C(C=C(C=C2[N+](=O)[O-])C(F)(F)F)[N+](=O)[O-]	1	3	3	2	Moderate	4.26637	In	10	0	NaN
826	Flumetsulam	CC1=NC2=NC(=NN2C=C1)S(=O)(=O)NC3=C(C=CC=C3F)F	1	3	3	2	Moderate	4.26637	In	10	0	NaN
828	Flumiclorac	C1CCC2=C(C1)C(=O)N(C2=O)C3=CC(=C(C=C3F)Cl)OCC(=O)O	1	3	3	2	Moderate	4.26637	In	10	0	NaN
829	Flumiclorac-pentyl	CCCCCOC(=O)COC1=C(C=C(C(=C1)N2C(=O)C3=C(C2=O)CCCC3)F)Cl	1	3	3	2	Moderate	4.26637	In	10	0	NaN
830	Flumioxazin	C#CCN1C(=O)COC2=CC(=C(C=C21)N3C(=O)C4=C(C3=O)CCCC4)F	1	3	3	2	Moderate	4.26637	In	10	0	NaN
831	Flumipropyn	CC(C#C)OC1=C(C=C(C(=C1)N2C(=O)C3=C(C2=O)CCCC3)F)Cl	1	3	3	2	Moderate	4.26637	In	10	0	NaN
833	Fluometuron	CN(C)C(=O)NC1=CC=CC(=C1)C(F)(F)F	1	3	3	2	Moderate	4.26637	In	10	0	NaN
834	Fluopicolide	C1=CC(=C(C(=C1)Cl)C(=O)NCC2=C(C=C(C=N2)C(F)(F)F)Cl)Cl	1	3	3	2	Moderate	4.26637	In	10	0	NaN
835	Fluopimomide	COC1=C(C(=C(C(=C1F)F)C(=O)NCC2=C(C=C(C=N2)C(F)(F)F)Cl)F)F	1	3	3	2	Moderate	4.26637	In	10	0	NaN
836	Fluopyram	C1=CC=C(C(=C1)C(=O)NCCC2=C(C=C(C=N2)C(F)(F)F)Cl)C(F)(F)F	1	3	3	2	Moderate	4.26637	In	10	0	NaN
837	Fluorbenside	C1=CC(=CC=C1CSC2=CC=C(C=C2)F)Cl	1	3	3	2	Moderate	4.26637	In	10	0	NaN
839	Fluoroacetamide	C(C(=O)N)F	1	3	3	2	Moderate	4.26637	In	10	0	NaN
840	Fluorodifen	C1=CC(=CC=C1[N+](=O)[O-])OC2=C(C=C(C=C2)C(F)(F)F)[N+](=O)[O-]	1	3	3	2	Moderate	4.26637	In	10	0	NaN
841	Fluoroglycofen	C1=CC(=C(C=C1C(F)(F)F)Cl)OC2=CC(=C(C=C2)[N+](=O)[O-])C(=O)OCC(=O)O	1	3	3	2	Moderate	4.26637	In	10	0	NaN
843	Fluoromidine	C1=C2C(=NC=C1Cl)N=C(N2)C(F)(F)F	1	3	3	2	Moderate	4.26637	In	10	0	NaN
844	Fluoronitrofen	C1=CC(=CC=C1[N+](=O)[O-])OC2=C(C=C(C=C2Cl)Cl)F	1	3	3	2	Moderate	4.26637	In	10	0	NaN
846	Fluotrimazole	C1=CC=C(C=C1)C(C2=CC=CC=C2)(C3=CC(=CC=C3)C(F)(F)F)N4C=NC=N4	1	3	3	2	Moderate	4.26637	In	10	0	NaN
848	Fluoxastrobin	CON=C(C1=CC=CC=C1OC2=C(C(=NC=N2)OC3=CC=CC=C3Cl)F)C4=NOCCO4	1	3	3	2	Moderate	4.26637	In	10	0	NaN
850	Flupentiofenox	C1=C(C(=CC(=C1F)OCCCCCSC(F)(F)F)S(=O)CC(F)(F)F)O	1	3	3	2	Moderate	4.26637	In	10	0	NaN
851	Flupoxam	C1=CC=C(C=C1)C2=NC(=NN2C3=CC(=C(C=C3)Cl)COCC(C(F)(F)F)(F)F)C(=O)N	1	3	3	2	Moderate	4.26637	In	10	0	NaN
853	Flupropadine	CC(C)(C)C1CCN(CC1)CC#CC2=CC(=CC(=C2)C(F)(F)F)C(F)(F)F	1	3	3	2	Moderate	4.26637	In	10	0	NaN
854	Flupropadine hydrochloride	CC(C)(C)C1CCN(CC#CC2=CC(=CC(=C2)C(F)(F)F)C(F)(F)F)CC1	1	3	3	2	Moderate	4.26637	In	10	0	NaN
855	Flupropanate	C(C(C(=O)O)(F)F)(F)F	1	3	3	2	Moderate	4.26637	In	10	0	NaN
856	Flupropanate-sodium	C(C(C(=O)[O-])(F)F)(F)F	1	3	3	2	Moderate	4.26637	In	10	0	NaN
861	Fluquinconazole	C1=CC2=C(C=C1F)C(=O)N(C(=N2)N3C=NC=N3)C4=C(C=C(C=C4)Cl)Cl	1	3	3	2	Moderate	4.26637	In	10	0	NaN
862	Flurazole	C1=CC=C(C=C1)COC(=O)C2=C(N=C(S2)Cl)C(F)(F)F	1	3	3	2	Moderate	4.26637	In	10	0	NaN
863	Flurenol	C1=CC=C2C(=C1)C3=CC=CC=C3C2(C(=O)O)O	1	3	3	2	Moderate	4.26637	In	10	0	NaN
864	Flurenol-butyl	CCCCOC(=O)C1(C2=CC=CC=C2C3=CC=CC=C31)O	1	3	3	2	Moderate	4.26637	In	10	0	NaN
865	Fluridone	CN1C=C(C(=O)C(=C1)C2=CC(=CC=C2)C(F)(F)F)C3=CC=CC=C3	1	3	3	2	Moderate	4.26637	In	10	0	NaN
866	Flurochloridone	C1C(C(C(=O)N1C2=CC=CC(=C2)C(F)(F)F)Cl)CCl	1	3	3	2	Moderate	4.26637	In	10	0	NaN
867	Fluroxypyr	C(C(=O)O)OC1=NC(=C(C(=C1Cl)N)Cl)F	1	3	3	2	Moderate	4.26637	In	10	0	NaN
868	Fluroxypyr-meptyl	CCCCCCC(C)OC(=O)COC1=NC(=C(C(=C1Cl)N)Cl)F	1	3	3	2	Moderate	4.26637	In	10	0	NaN
869	Flurprimidol	CC(C)C(C1=CC=C(C=C1)OC(F)(F)F)(C2=CN=CN=C2)O	1	3	3	2	Moderate	4.26637	In	10	0	NaN
870	Flurtamone	CNC1=C(C(=O)C(O1)C2=CC=CC=C2)C3=CC(=CC=C3)C(F)(F)F	1	3	3	2	Moderate	4.26637	In	10	0	NaN
871	Flusilazole	C[Si](CN1C=NC=N1)(C2=CC=C(C=C2)F)C3=CC=C(C=C3)F	1	3	3	2	Moderate	4.26637	In	10	0	NaN
872	Flusulfamide	C1=CC(=C(C=C1[N+](=O)[O-])Cl)NS(=O)(=O)C2=CC(=C(C=C2)Cl)C(F)(F)F	1	3	3	2	Moderate	4.26637	In	10	0	NaN
873	Fluthiacet	C1CCN2C(=O)SC(=NC3=CC(=C(C=C3F)Cl)SCC(=O)O)N2C1	1	3	3	2	Moderate	4.26637	In	10	0	NaN
874	Fluthiacet-methyl	COC(=O)CSC1=C(C=C(C(=C1)N=C2N3CCCCN3C(=O)S2)F)Cl	1	3	3	2	Moderate	4.26637	In	10	0	NaN
876	Flutolanil	CC(C)OC1=CC=CC(=C1)NC(=O)C2=CC=CC=C2C(F)(F)F	1	3	3	2	Moderate	4.26637	In	10	0	NaN
877	Flutriafol	C1=CC=C(C(=C1)C(CN2C=NC=N2)(C3=CC=C(C=C3)F)O)F	1	3	3	2	Moderate	4.26637	In	10	0	NaN
878	Fluvalinate	CC(C)C(C(=O)OC(C#N)C1=CC(=CC=C1)OC2=CC=CC=C2)NC3=C(C=C(C=C3)C(F)(F)F)Cl	1	3	3	2	Moderate	4.26637	In	10	0	NaN
879	Fluxametamide	Cc1cc(ccc1C(=O)NC=NOC)C2=NOC(C2)(c3cc(cc(c3)Cl)Cl)C(F)(F)F	1	3	3	2	Moderate	4.26637	In	10	0	NaN
880	Fluxapyroxad	CN1C=C(C(=N1)C(F)F)C(=O)NC2=CC=CC=C2C3=CC(=C(C(=C3)F)F)F	1	3	3	2	Moderate	4.26637	In	10	0	NaN
881	Fluxofenim	C1COC(O1)CON=C(C2=CC=C(C=C2)Cl)C(F)(F)F	1	3	3	2	Moderate	4.26637	In	10	0	NaN
882	Folpet	C1=CC=C2C(=C1)C(=O)N(C2=O)SC(Cl)(Cl)Cl	1	3	3	2	Moderate	4.26637	In	10	0	NaN
886	Forchlorfenuron	C1=CC=C(C=C1)NC(=O)NC2=CC(=NC=C2)Cl	1	3	3	2	Moderate	4.26637	In	10	0	NaN
887	Formaldehyde	C=O	1	3	3	2	Moderate	4.26637	In	10	0	NaN
888	Formetanate	CNC(=O)OC1=CC=CC(=C1)N=CN(C)C	1	3	3	2	Moderate	4.26637	In	10	0	NaN
889	Formetanate hydrochloride	CNC(=O)OC1=CC=CC(=C1)N=CN(C)C.Cl	1	3	3	2	Moderate	4.26637	In	10	0	NaN
891	Formparanate	CC1=C(C=CC(=C1)OC(=O)NC)N=CN(C)C	1	3	3	2	Moderate	4.26637	In	10	0	NaN
892	Fosamine	CCOP(=O)(C(=O)N)O	1	3	3	2	Moderate	4.26637	In	10	0	NaN
893	Fosetyl	CCOP(=O)=O	1	3	3	2	Moderate	4.26637	In	10	0	NaN
895	Fospirate	COP(=O)(OC)OC1=NC(=C(C=C1Cl)Cl)Cl	1	3	3	2	Moderate	4.26637	In	10	0	NaN
897	Fosthietan	CCOP(=O)(N=C1SCS1)OCC	1	3	3	2	Moderate	4.26637	In	10	0	NaN
898	Fuberidazole	C1=CC=C2C(=C1)NC(=N2)C3=CC=CO3	1	3	3	2	Moderate	4.26637	In	10	0	NaN
899	Fufenozide	CC1CC2=C(O1)C(=C(C=C2)C(=O)NN(C(=O)C3=CC(=CC(=C3)C)C)C(C)(C)C)C	1	3	3	2	Moderate	4.26637	In	10	0	NaN
902	Furalane	C1COC(O1)C2=CC=CO2	1	3	3	2	Moderate	4.26637	In	10	0	NaN
903	Furalaxyl	CC1=C(C(=CC=C1)C)N(C(C)C(=O)OC)C(=O)C2=CC=CO2	1	3	3	2	Moderate	4.26637	In	10	0	NaN
904	Furalaxyl-M	CC1=C(C(=CC=C1)C)N(C(C)C(=O)OC)C(=O)C2=CC=C(C=C2)C(=O)C3=CC=CC=C3	1	3	3	2	Moderate	4.26637	In	10	0	NaN
905	Furametpyr	CC1C2=C(C=CC=C2NC(=O)C3=C(N(N=C3C)C)Cl)C(O1)(C)C	1	3	3	2	Moderate	4.26637	In	10	0	NaN
906	Furathiocarb	CCCCOC(=O)N(C)SN(C)C(=O)OC1=CC=CC2=C1OC(C2)(C)C	1	3	3	2	Moderate	4.26637	In	10	0	NaN
907	Furconazole	C1CC(OC1OCC(F)(F)F)(CN2C=NC=N2)C3=C(C=C(C=C3)Cl)Cl	1	3	3	2	Moderate	4.26637	In	10	0	NaN
909	Furfural	C1=COC(=C1)C=O	1	3	3	2	Moderate	4.26637	In	10	0	NaN
910	Furilazole	CC1(N(CC(O1)C2=CC=CO2)C(=O)C(Cl)Cl)C	1	3	3	2	Moderate	4.26637	In	10	0	NaN
911	Furmecyclox	CC1=CC(=C(O1)C)C(=O)N(C2CCCCC2)OC	1	3	3	2	Moderate	4.26637	In	10	0	NaN
912	Furyloxyfen	C1COCC1OC2=C(C=CC(=C2)OC3=C(C=C(C=C3)C(F)(F)F)Cl)[N+](=O)[O-]	1	3	3	2	Moderate	4.26637	In	10	0	NaN
914	Gliftor	OC(CF)CF	1	3	3	2	Moderate	4.26637	In	10	0	NaN
915	Glufosinate	CP(=O)(CCC(C(=O)O)N)O	1	3	3	2	Moderate	4.26637	In	10	0	NaN
916	Glufosinate-ammonium	CP(=O)(CCC(C(=O)[O-])N)O	1	3	3	2	Moderate	4.26637	In	10	0	NaN
917	Glutaraldehyde	C(CC=O)CC=O	1	3	3	2	Moderate	4.26637	In	10	0	NaN
918	Glycerin	C(C(CO)O)O	1	3	3	2	Moderate	4.26637	In	10	0	NaN
919	Glyceryl distearate	CCCCCCCCCCCCCCCCCC(=O)OCC(COC(=O)CCCCCCCCCCCCCCCCC)O	1	3	3	2	Moderate	4.26637	In	10	0	NaN
920	Glyodin	CCCCCCCCCCCCCCCCCC1=NCC[NH2+]1	1	3	3	2	Moderate	4.26637	In	10	0	NaN
921	Glyphosate	C(C(=O)O)NCP(=O)(O)O	1	3	3	2	Moderate	4.26637	In	10	0	NaN
922	Glyphosate-dimethylammonium	CNC.C(C(=O)O)NCP(=O)(O)O	1	3	3	2	Moderate	4.26637	In	10	0	NaN
923	Glyphosate-isopropylamine	CC(C)N.C(C(=O)O)NCP(=O)(O)O	1	3	3	2	Moderate	4.26637	In	10	0	NaN
924	Glyphosate-monoammonium	OC(=O)CNCP(O)(O)=O	1	3	3	2	Moderate	4.26637	In	10	0	NaN
925	Glyphosate-trimesium	OC(=O)CNCP(O)([O-])=O	1	3	3	2	Moderate	4.26637	In	10	0	NaN
926	Glyphosine	C(C(=O)O)N(CP(=O)(O)O)CP(=O)(O)O	1	3	3	2	Moderate	4.26637	In	10	0	NaN
928	Guadipyr	CCCCC=NN(CC1=CN=C(C=C1)Cl)C(=N[N+](=O)[O-])N	1	3	3	2	Moderate	4.26637	In	10	0	NaN
929	Guazatine	C(CCCCN=C(N)N)CCCNCCCCCCCCN=C(N)N	1	3	3	2	Moderate	4.26637	In	10	0	NaN
930	Gypsum	O.O.[O-]S(=O)(=O)[O-]	1	3	3	2	Moderate	4.26637	In	10	0	NaN
932	Halauxifen	COC1=C(C=CC(=C1F)C2=NC(=C(C(=C2)N)Cl)C(=O)O)Cl	1	3	3	2	Moderate	4.26637	In	10	0	NaN
933	Halauxifen-methyl	COC1=C(C=CC(=C1F)C2=NC(=C(C(=C2)N)Cl)C(=O)OC)Cl	1	3	3	2	Moderate	4.26637	In	10	0	NaN
934	Halfenprox	CC(C)(COCC1=CC(=CC=C1)OC2=CC=CC=C2)C3=CC=C(C=C3)OC(F)(F)Br	1	3	3	2	Moderate	4.26637	In	10	0	NaN
935	Halofenozide	CC(C)(C)N(C(=O)C1=CC=CC=C1)NC(=O)C2=CC=C(C=C2)Cl	1	3	3	2	Moderate	4.26637	In	10	0	NaN
939	Haloxyfop	CC(C(=O)O)OC1=CC=C(C=C1)OC2=C(C=C(C=N2)C(F)(F)F)Cl	1	3	3	2	Moderate	4.26637	In	10	0	NaN
940	Haloxyfop-etotyl	CCOCCOC(=O)C(C)OC1=CC=C(C=C1)OC2=C(C=C(C=N2)C(F)(F)F)Cl	1	3	3	2	Moderate	4.26637	In	10	0	NaN
941	Haloxyfop-P	CC(C(=O)O)OC1=CC=C(C=C1)OC2=C(C=C(C=N2)C(F)(F)F)Cl	1	3	3	2	Moderate	4.26637	In	10	0	NaN
942	Haloxyfop-P-methyl	CC(C(=O)OC)OC1=CC=C(C=C1)OC2=C(C=C(C=N2)C(F)(F)F)Cl	1	3	3	2	Moderate	4.26637	In	10	0	NaN
943	Haloxyfop-sodium	CC(C(=O)[O-])OC1=CC=C(C=C1)OC2=C(C=C(C=N2)C(F)(F)F)Cl	1	3	3	2	Moderate	4.26637	In	10	0	NaN
947	Heptopargil	CC1(C2CCC1(C(=NOCC#C)C2)C)C	1	3	3	2	Moderate	4.26637	In	10	0	NaN
949	Hexachloroacetone	C(=O)(C(Cl)(Cl)Cl)C(Cl)(Cl)Cl	1	3	3	2	Moderate	4.26637	In	10	0	NaN
950	Hexachlorobenzene	C1(=C(C(=C(C(=C1Cl)Cl)Cl)Cl)Cl)Cl	1	3	3	2	Moderate	4.26637	In	10	0	NaN
951	Hexachlorophene	C1=C(C(=C(C(=C1Cl)Cl)CC2=C(C(=CC(=C2Cl)Cl)Cl)O)O)Cl	1	3	3	2	Moderate	4.26637	In	10	0	NaN
952	Hexaconazole	CCCCC(CN1C=NC=N1)(C2=C(C=C(C=C2)Cl)Cl)O	1	3	3	2	Moderate	4.26637	In	10	0	NaN
953	Hexadecanoic acid	CCCCCCCCCCCCCCCC(=O)O	1	3	3	2	Moderate	4.26637	In	10	0	NaN
954	Hexaflumuron	C1=CC(=C(C(=C1)F)C(=O)NC(=O)NC2=CC(=C(C(=C2)Cl)OC(C(F)F)(F)F)Cl)F	1	3	3	2	Moderate	4.26637	In	10	0	NaN
955	Hexaflurate	F[As-](F)(F)(F)(F)F	1	3	3	2	Moderate	4.26637	In	10	0	NaN
956	Hexazinone	CN1C(=NC(=O)N(C1=O)C2CCCCC2)N(C)C	1	3	3	2	Moderate	4.26637	In	10	0	NaN
957	Hexylene glycol	CC(CC(C)(C)O)O	1	3	3	2	Moderate	4.26637	In	10	0	NaN
959	Hexythiazox	CC1C(SC(=O)N1C(=O)NC2CCCCC2)C3=CC=C(C=C3)Cl	1	3	3	2	Moderate	4.26637	In	10	0	NaN
960	Huanjunzuo	C1CC[C@H]([C@@](CC1)(C2=CC=C(C=C2)Cl)O)N3C=NC=N3	1	3	3	2	Moderate	4.26637	In	10	0	NaN
963	Hydroquinone	C1=CC(=CC=C1O)O	1	3	3	2	Moderate	4.26637	In	10	0	NaN
965	Hyquincarb	CC1=NC2=C(CCCC2)C(=C1)OC(=O)N(C)C	1	3	3	2	Moderate	4.26637	In	10	0	NaN
966	Icaridin	CCC(C)OC(=O)N1CCCCC1CCO	1	3	3	2	Moderate	4.26637	In	10	0	NaN
970	Imazamethabenz	CC1=CC(=C(C=C1)C(=O)O)C2=NC(C(=O)N2)(C)C(C)C	1	3	3	2	Moderate	4.26637	In	10	0	NaN
971	Imazamethabenz-methyl	COC(=O)c1ccc(C)cc1C1=NC(C)(C(C)C)C(=O)N1	1	3	3	2	Moderate	4.26637	In	10	0	NaN
972	Imazamox	CC(C)C1(C(=O)NC(=N1)C2=NC=C(C=C2C(=O)O)COC)C	1	3	3	2	Moderate	4.26637	In	10	0	NaN
973	Imazapic	CC1=CN=C(C(=C1)C(=O)O)C2=NC(C(=O)N2)(C)C(C)C	1	3	3	2	Moderate	4.26637	In	10	0	NaN
974	Imazapic-ammonium	CC(C)C1(C)N=C(NC1=O)C1=C(C=C(C)C=N1)C(O)=O	1	3	3	2	Moderate	4.26637	In	10	0	NaN
975	Imazapyr	CC(C)C1(C(=O)NC(=N1)C2=C(C=CC=N2)C(=O)O)C	1	3	3	2	Moderate	4.26637	In	10	0	NaN
976	Imazaquin	CC(C)C1(C(=O)NC(=N1)C2=NC3=CC=CC=C3C=C2C(=O)O)C	1	3	3	2	Moderate	4.26637	In	10	0	NaN
977	Imazaquin ammonium	CC(C)C1(C(=O)NC(=N1)C2=NC3=CC=CC=C3C=C2C(=O)[O-])C	1	3	3	2	Moderate	4.26637	In	10	0	NaN
978	Imazaquin methyl	CC(C)C1(C(=O)NC(=N1)C2=NC3=CC=CC=C3C=C2C(=O)OC)C	1	3	3	2	Moderate	4.26637	In	10	0	NaN
979	Imazaquin sodium	CC(C)C1(C(=O)NC(=N1)C2=NC3=CC=CC=C3C=C2C(=O)[O-])C	1	3	3	2	Moderate	4.26637	In	10	0	NaN
980	Imazethapyr	CCC1=CN=C(C(=C1)C(=O)O)C2=NC(C(=O)N2)(C)C(C)C	1	3	3	2	Moderate	4.26637	In	10	0	NaN
981	Imazethapyr ammonium	CCC1=CC(=C(N=C1)C2=NC(C(=O)N2)(C)C(C)C)C(=O)[O-]	1	3	3	2	Moderate	4.26637	In	10	0	NaN
985	Imidacloprid	C1CN(C(=N1)N[N+](=O)[O-])CC2=CN=C(C=C2)Cl	1	3	3	2	Moderate	4.26637	In	10	0	NaN
987	Iminoctadine triacetate	NC(N)=NCCCCCCCCNCCCCCCCCN=C(N)N	1	3	3	2	Moderate	4.26637	In	10	0	NaN
989	Inabenfide	C1=CC=C(C=C1)C(C2=C(C=CC(=C2)Cl)NC(=O)C3=CC=NC=C3)O	1	3	3	2	Moderate	4.26637	In	10	0	NaN
990	Indanofan	CCC1(C(=O)C2=CC=CC=C2C1=O)CC3(CO3)C4=CC(=CC=C4)Cl	1	3	3	2	Moderate	4.26637	In	10	0	NaN
991	Indazapyroxamet	CC1(CC1)NC(=O)C2=CC=CC3=NN(C=C32)C4=CN=CC=C4	1	3	3	2	Moderate	4.26637	In	10	0	NaN
992	Indaziflam	CC1CC2=C(C1NC3=NC(=NC(=N3)N)C(C)F)C=C(C=C2)C	1	3	3	2	Moderate	4.26637	In	10	0	NaN
993	Indolauxipyr	C1=CC(=C(C2=C1C=CN2)F)C3=NC(=C(C(=C3F)N)Cl)C(=O)O	1	3	3	2	Moderate	4.26637	In	10	0	NaN
994	Indolauxipyr-cyanomethyl	C1=CC(=C(C2=C1C=CN2)F)C3=NC(=C(C(=C3F)N)Cl)C(=O)OCC#N	1	3	3	2	Moderate	4.26637	In	10	0	NaN
995	Indoxacarb	COC(=O)C12CC3=C(C1=NN(CO2)C(=O)N(C4=CC=C(C=C4)OC(F)(F)F)C(=O)OC)C=CC(=C3)Cl	1	3	3	2	Moderate	4.26637	In	10	0	NaN
997	Inpyrfluxam	CC1CC(C2=C1C(=CC=C2)NC(=O)C3=CN(N=C3C(F)F)C)(C)C	1	3	3	2	Moderate	4.26637	In	10	0	NaN
1000	Iodomethane	CI	1	3	3	2	Moderate	4.26637	In	10	0	NaN
1005	Ioxynil	C1=C(C=C(C(=C1I)O)I)C#N	1	3	3	2	Moderate	4.26637	In	10	0	NaN
1006	Ioxynil octanoate	CCCCCCCC(=O)OC1=C(C=C(C=C1I)C#N)I	1	3	3	2	Moderate	4.26637	In	10	0	NaN
1007	Ipazine	CCN(CC)C1=NC(=NC(=N1)NC(C)C)Cl	1	3	3	2	Moderate	4.26637	In	10	0	NaN
1008	Ipconazole	CC(C)C1CCC(C1(CN2C=NC=N2)O)CC3=CC=C(C=C3)Cl	1	3	3	2	Moderate	4.26637	In	10	0	NaN
1009	Ipfencarbazone	CC(C)N(C1=C(C=C(C=C1)F)F)C(=O)N2C=NN(C2=O)C3=C(C=C(C=C3)Cl)Cl	1	3	3	2	Moderate	4.26637	In	10	0	NaN
1010	Ipfentrifluconazole	CC(C)C(CN1C=NC=N1)(C2=C(C=C(C=C2)OC3=CC=C(C=C3)Cl)C(F)(F)F)O	1	3	3	2	Moderate	4.26637	In	10	0	NaN
1011	Ipflufenoquin	CC1=C(C=C2C=CC(=C(C2=N1)F)F)OC3=C(C(=CC=C3)F)C(C)(C)O	1	3	3	2	Moderate	4.26637	In	10	0	NaN
1013	Iprodione	CC(C)NC(=O)N1CC(=O)N(C1=O)C2=CC(=CC(=C2)Cl)Cl	1	3	3	2	Moderate	4.26637	In	10	0	NaN
1014	Iprovalicarb	CC1=CC=C(C=C1)C(C)NC(=O)C(C(C)C)NC(=O)OC(C)C	1	3	3	2	Moderate	4.26637	In	10	0	NaN
1019	Isobornyl thiocyanoacetate	CC1(C2CCC1(C(C2)OC(=O)CSC#N)C)C	1	3	3	2	Moderate	4.26637	In	10	0	NaN
1020	Isocarbamid	CC(C)CNC(=O)N1CCNC1=O	1	3	3	2	Moderate	4.26637	In	10	0	NaN
1023	Isocycloseram	CCN1C(=O)C(CO1)NC(=O)C2=C(C=C(C=C2)C3=NOC(C3)(C4=CC(=C(C(=C4)Cl)F)Cl)C(F)(F)F)C	1	3	3	2	Moderate	4.26637	In	10	0	NaN
1027	Isofetamid	CC1=C(SC=C1)C(=O)NC(C)(C)C(=O)C2=C(C=C(C=C2)OC(C)C)C	1	3	3	2	Moderate	4.26637	In	10	0	NaN
1028	Isoflucypram	FC(F)c1nn(C)c(F)c1C(=O)N(Cc1cc(Cl)ccc1C(C)C)C1CC1	1	3	3	2	Moderate	4.26637	In	10	0	NaN
1029	Isolan	CC1=NN(C(=C1)OC(=O)N(C)C)C(C)C	1	3	3	2	Moderate	4.26637	In	10	0	NaN
1031	Isomethiozin	CC(C)C=NN1C(=O)C(=NN=C1SC)C(C)(C)C	1	3	3	2	Moderate	4.26637	In	10	0	NaN
1032	Isonoruron	CN(C)C(=O)NC1CCC2C1C3CCC2C3	1	3	3	2	Moderate	4.26637	In	10	0	NaN
1034	Isopolinate	CC(C)SC(=O)N1CCCCCC1	1	3	3	2	Moderate	4.26637	In	10	0	NaN
1035	Isoprocarb	CC(C)C1=CC=CC=C1OC(=O)NC	1	3	3	2	Moderate	4.26637	In	10	0	NaN
1036	Isopropalin	CCCN(CCC)C1=C(C=C(C=C1[N+](=O)[O-])C(C)C)[N+](=O)[O-]	1	3	3	2	Moderate	4.26637	In	10	0	NaN
1037	Isopropyl myristate	CCCCCCCCCCCCCC(=O)OC(C)C	1	3	3	2	Moderate	4.26637	In	10	0	NaN
1038	Isoprothiolane	CC(C)OC(=O)C(=C1SCCS1)C(=O)OC(C)C	1	3	3	2	Moderate	4.26637	In	10	0	NaN
1039	Isoproturon	CC(C)C1=CC=C(C=C1)NC(=O)N(C)C	1	3	3	2	Moderate	4.26637	In	10	0	NaN
1040	Isopyrazam	CC(C)C1C2CCC1C3=C2C=CC=C3NC(=O)C4=CN(N=C4C(F)F)C	1	3	3	2	Moderate	4.26637	In	10	0	NaN
1041	Isopyrimol	CC(C)C(C1=CC=C(C=C1)Cl)(C2=CN=CN=C2)O	1	3	3	2	Moderate	4.26637	In	10	0	NaN
1043	Isotianil	C1=CC=C(C(=C1)C#N)NC(=O)C2=C(C(=NS2)Cl)Cl	1	3	3	2	Moderate	4.26637	In	10	0	NaN
1044	Isouron	CC(C)(C)C1=CC(=NO1)NC(=O)N(C)C	1	3	3	2	Moderate	4.26637	In	10	0	NaN
1045	Isoval	CC(C)CC(=O)C1C(=O)C2=CC=CC=C2C1=O	1	3	3	2	Moderate	4.26637	In	10	0	NaN
1046	Isoxaben	CCC(C)(CC)C1=NOC(=C1)NC(=O)C2=C(C=CC=C2OC)OC	1	3	3	2	Moderate	4.26637	In	10	0	NaN
1047	Isoxachlortole	CS(=O)(=O)C1=C(C=CC(=C1)Cl)C(=O)C2=C(ON=C2)C3CC3	1	3	3	2	Moderate	4.26637	In	10	0	NaN
1048	Isoxadifen	C1C(=NOC1(C2=CC=CC=C2)C3=CC=CC=C3)C(=O)O	1	3	3	2	Moderate	4.26637	In	10	0	NaN
1049	Isoxadifen ethyl	CCOC(=O)C1=NOC(C1)(C2=CC=CC=C2)C3=CC=CC=C3	1	3	3	2	Moderate	4.26637	In	10	0	NaN
1050	Isoxaflutole	CS(=O)(=O)C1=C(C=CC(=C1)C(F)(F)F)C(=O)C2=C(ON=C2)C3CC3	1	3	3	2	Moderate	4.26637	In	10	0	NaN
1051	Isoxapyrifop	CC(C(=O)N1CCCO1)OC2=CC=C(C=C2)OC3=C(C=C(C=N3)Cl)Cl	1	3	3	2	Moderate	4.26637	In	10	0	NaN
1053	Izopamfos	CCCCCCCCCOCCC[NH3+]	1	3	3	2	Moderate	4.26637	In	10	0	NaN
1056	Kaolin	O=[Al]O[Si](=O)O[Si](=O)O[Al]=O	1	3	3	2	Moderate	4.26637	In	10	0	NaN
1059	Karbutilate	CC(C)(C)NC(=O)OC1=CC=CC(=C1)NC(=O)N(C)C	1	3	3	2	Moderate	4.26637	In	10	0	NaN
1060	Kelevan	CCOC(=O)CCC(=O)CC1(C2(C3(C4(C1(C5(C2(C3(C(C45Cl)(Cl)Cl)Cl)Cl)Cl)Cl)Cl)Cl)Cl)O	1	3	3	2	Moderate	4.26637	In	10	0	NaN
1063	Kresoxim-methyl	CC1=CC=CC=C1OCC2=CC=CC=C2C(=NOC)C(=O)OC	1	3	3	2	Moderate	4.26637	In	10	0	NaN
1064	Lactofen	CCOC(=O)C(C)OC(=O)C1=C(C=CC(=C1)OC2=C(C=C(C=C2)C(F)(F)F)Cl)[N+](=O)[O-]	1	3	3	2	Moderate	4.26637	In	10	0	NaN
1069	Lead arsenate	O[As](=O)([O-])[O-]	1	3	3	2	Moderate	4.26637	In	10	0	NaN
1072	Lime sulphur	[S-]SSS[S-]	1	3	3	2	Moderate	4.26637	In	10	0	NaN
1073	Limestone	C(=O)([O-])[O-]	1	3	3	2	Moderate	4.26637	In	10	0	NaN
1074	Lindane	C1(C(C(C(C(C1Cl)Cl)Cl)Cl)Cl)Cl	1	3	3	2	Moderate	4.26637	In	10	0	NaN
1075	Linuron	CN(C(=O)NC1=CC(=C(C=C1)Cl)Cl)OC	1	3	3	2	Moderate	4.26637	In	10	0	NaN
1076	Lithium perfluorooctane sulfonate	C(C(C(C(C(F)(F)S(=O)(=O)[O-])(F)F)(F)F)(F)F)(C(C(C(F)(F)F)(F)F)(F)F)(F)F	1	3	3	2	Moderate	4.26637	In	10	0	NaN
1077	Lufenuron	C1=CC(=C(C(=C1)F)C(=O)NC(=O)NC2=CC(=C(C=C2Cl)OC(C(C(F)(F)F)F)(F)F)Cl)F	1	3	3	2	Moderate	4.26637	In	10	0	NaN
1084	Malic acid	C(C(C(=O)O)O)C(=O)O	1	3	3	2	Moderate	4.26637	In	10	0	NaN
1087	Mandestrobin	CC1=CC(=C(C=C1)C)OCC2=CC=CC=C2C(C(=O)NC)OC	1	3	3	2	Moderate	4.26637	In	10	0	NaN
1088	Mandipropamid	COC1=C(C=CC(=C1)CCNC(=O)C(C2=CC=C(C=C2)Cl)OCC#C)OCC#C	1	3	3	2	Moderate	4.26637	In	10	0	NaN
1090	Mazidox	CN(C)P(=O)(N=[N+]=[N-])N(C)C	1	3	3	2	Moderate	4.26637	In	10	0	NaN
1091	MCPA	CC1=C(C=CC(=C1)Cl)OCC(=O)O	1	3	3	2	Moderate	4.26637	In	10	0	NaN
1092	MCPA-butotyl	CCCCOCCOC(=O)COC1=C(C=C(C=C1)Cl)C	1	3	3	2	Moderate	4.26637	In	10	0	NaN
1093	MCPA-butyl	CCCCOC(=O)COC1=C(C=C(C=C1)Cl)C	1	3	3	2	Moderate	4.26637	In	10	0	NaN
1094	MCPA-dimethylammonium	CC1=C(C=CC(=C1)Cl)OCC(=O)O.CNC	1	3	3	2	Moderate	4.26637	In	10	0	NaN
1095	MCPA-diolamine	CC1=C(C=CC(=C1)Cl)OCC(=O)O.C(CO)NCCO	1	3	3	2	Moderate	4.26637	In	10	0	NaN
1096	MCPA-etexyl	CCCCC(CC)COC(=O)COC1=C(C=C(C=C1)Cl)C	1	3	3	2	Moderate	4.26637	In	10	0	NaN
1097	MCPA-ethyl	CCOC(=O)COC1=C(C=C(C=C1)Cl)C	1	3	3	2	Moderate	4.26637	In	10	0	NaN
1098	MCPA-isobutyl	CC1=C(C=CC(=C1)Cl)OCC(=O)OCC(C)C	1	3	3	2	Moderate	4.26637	In	10	0	NaN
1099	MCPA-isoctyl	CC1=C(C=CC(=C1)Cl)OCC(=O)OCCCCCC(C)C	1	3	3	2	Moderate	4.26637	In	10	0	NaN
1100	MCPA-isopropyl	CC1=C(C=CC(=C1)Cl)OCC(=O)OC(C)C	1	3	3	2	Moderate	4.26637	In	10	0	NaN
1101	MCPA-methyl	CC1=C(C=CC(=C1)Cl)OCC(=O)OC	1	3	3	2	Moderate	4.26637	In	10	0	NaN
1102	MCPA-olamine	CC1=C(OCC(O)=O)C=CC(Cl)=C1	1	3	3	2	Moderate	4.26637	In	10	0	NaN
1103	MCPA-thioethyl	CCSC(=O)COC1=C(C=C(C=C1)Cl)C	1	3	3	2	Moderate	4.26637	In	10	0	NaN
1104	MCPB	CC1=C(C=CC(=C1)Cl)OCCCC(=O)O	1	3	3	2	Moderate	4.26637	In	10	0	NaN
1105	M-cumenyl methylcarbamate	CC(C)C1=CC(=CC=C1)OC(=O)NC	1	3	3	2	Moderate	4.26637	In	10	0	NaN
1106	Mebenil	CC1=CC=CC=C1C(=O)NC2=CC=CC=C2	1	3	3	2	Moderate	4.26637	In	10	0	NaN
1110	Mecoprop	CC1=C(C=CC(=C1)Cl)OC(C)C(=O)O	1	3	3	2	Moderate	4.26637	In	10	0	NaN
1111	Mecoprop dimethylammonium	CC1=C(C=CC(=C1)Cl)OC(C)C(=O)O.CNC	1	3	3	2	Moderate	4.26637	In	10	0	NaN
1112	Mecoprop etexyl	CCCCC(CC)COC(=O)C(C)OC1=C(C=C(C=C1)Cl)C	1	3	3	2	Moderate	4.26637	In	10	0	NaN
1113	Mecoprop methyl	CC1=C(C=CC(=C1)Cl)OC(C)C(=O)OC	1	3	3	2	Moderate	4.26637	In	10	0	NaN
1114	Mecoprop trolamine	CC1=C(C=CC(=C1)Cl)OC(C)C(=O)O.C(CO)N(CCO)CCO	1	3	3	2	Moderate	4.26637	In	10	0	NaN
1115	Mecoprop-P etexyl	CCCCC(CC)COC(=O)C(C)OC1=C(C=C(C=C1)Cl)C	1	3	3	2	Moderate	4.26637	In	10	0	NaN
1116	Mecoprop-P isobutyl	CC1=C(C=CC(=C1)Cl)OC(C)C(=O)OCC(C)C	1	3	3	2	Moderate	4.26637	In	10	0	NaN
1117	Medetomidine	CC1=C(C(=CC=C1)C(C)C2=CN=CN2)C	1	3	3	2	Moderate	4.26637	In	10	0	NaN
1118	Medinoterb	CC1=C(C=C(C(=C1[N+](=O)[O-])O)C(C)(C)C)[N+](=O)[O-]	1	3	3	2	Moderate	4.26637	In	10	0	NaN
1119	Medinoterb acetate	CC1=C(C=C(C(=C1[N+](=O)[O-])OC(=O)C)C(C)(C)C)[N+](=O)[O-]	1	3	3	2	Moderate	4.26637	In	10	0	NaN
1121	Mefenpyr	CC1(CC(=NN1C2=C(C=C(C=C2)Cl)Cl)C(=O)O)C(=O)O	1	3	3	2	Moderate	4.26637	In	10	0	NaN
1122	Mefenpyr diethyl	CCOC(=O)C1=NN(C(C1)(C)C(=O)OCC)C2=C(C=C(C=C2)Cl)Cl	1	3	3	2	Moderate	4.26637	In	10	0	NaN
1123	Mefentrifluconazole	CC(CN1C=NC=N1)(C2=C(C=C(C=C2)OC3=CC=C(C=C3)Cl)C(F)(F)F)O	1	3	3	2	Moderate	4.26637	In	10	0	NaN
1126	Mepanipyrim	CC#CC1=CC(=NC(=N1)NC2=CC=CC=C2)C	1	3	3	2	Moderate	4.26637	In	10	0	NaN
1128	Mephenate	CNC(=O)Oc1ccc(Cl)cc1	1	3	3	2	Moderate	4.26637	In	10	0	NaN
1129	Mephosfolan	CCOP(=O)(N=C1SCC(S1)C)OCC	1	3	3	2	Moderate	4.26637	In	10	0	NaN
1130	Mepiquat	C[N+]1(CCCCC1)C	1	3	3	2	Moderate	4.26637	In	10	0	NaN
1131	Mepronil	CC1=CC=CC=C1C(=O)NC2=CC(=CC=C2)OC(C)C	1	3	3	2	Moderate	4.26637	In	10	0	NaN
1137	Metaflumizone	C1=CC(=CC(=C1)C(F)(F)F)C(=NNC(=O)NC2=CC=C(C=C2)OC(F)(F)F)CC3=CC=C(C=C3)C#N	1	3	3	2	Moderate	4.26637	In	10	0	NaN
1138	Metalaxyl	CC1=C(C(=CC=C1)C)N(C(C)C(=O)OC)C(=O)COC	1	3	3	2	Moderate	4.26637	In	10	0	NaN
1139	Metalaxyl-M	CC1=C(C(=CC=C1)C)N(C(C)C(=O)OC)C(=O)COC	1	3	3	2	Moderate	4.26637	In	10	0	NaN
1140	Metaldehyde	CC1OC(OC(OC(O1)C)C)C	1	3	3	2	Moderate	4.26637	In	10	0	NaN
1141	Metam	CNC(=S)S	1	3	3	2	Moderate	4.26637	In	10	0	NaN
1142	Metamifop	CC(C(=O)N(C)C1=CC=CC=C1F)OC2=CC=C(C=C2)OC3=NC4=C(O3)C=C(C=C4)Cl	1	3	3	2	Moderate	4.26637	In	10	0	NaN
1143	Metamitron	CC1=NN=C(C(=O)N1N)C2=CC=CC=C2	1	3	3	2	Moderate	4.26637	In	10	0	NaN
1144	Metarylpicoxamid	CCC(=O)OC1=C(C=CN=C1C(=O)N[C@@H](C)C(=O)O[C@@H](C)[C@@H](C)C2=CC=CC=C2C)OC	1	3	3	2	Moderate	4.26637	In	10	0	NaN
1145	Metazachlor	CC1=C(C(=CC=C1)C)N(CN2C=CC=N2)C(=O)CCl	1	3	3	2	Moderate	4.26637	In	10	0	NaN
1147	Metazoxolon	CC1=NOC(=O)C1=NNC2=CC(=CC=C2)Cl	1	3	3	2	Moderate	4.26637	In	10	0	NaN
1149	Metconazole	CC1(CCC(C1(CN2C=NC=N2)O)CC3=CC=C(C=C3)Cl)C	1	3	3	2	Moderate	4.26637	In	10	0	NaN
1150	Metepa	CC1CN1P(=O)(N2CC2C)N3CC3C	1	3	3	2	Moderate	4.26637	In	10	0	NaN
1151	Methabenzthiazuron	CNC(=O)N(C)C1=NC2=CC=CC=C2S1	1	3	3	2	Moderate	4.26637	In	10	0	NaN
1155	Methazole	CN1C(=O)N(OC1=O)C2=CC(=C(C=C2)Cl)Cl	1	3	3	2	Moderate	4.26637	In	10	0	NaN
1156	Methfuroxam	CC1=C(OC(=C1C(=O)NC2=CC=CC=C2)C)C	1	3	3	2	Moderate	4.26637	In	10	0	NaN
1161	Methiozolin	CC1=C(SC=C1)C2=NOC(C2)(C)COCC3=C(C=CC=C3F)F	1	3	3	2	Moderate	4.26637	In	10	0	NaN
1162	Methiuron	CC1=CC(=CC=C1)NC(=S)N(C)C	1	3	3	2	Moderate	4.26637	In	10	0	NaN
1166	Methoprotryne	CC(C)NC1=NC(=NC(=N1)NCCCOC)SC	1	3	3	2	Moderate	4.26637	In	10	0	NaN
1167	Methoxychlor	COC1=CC=C(C=C1)C(C2=CC=C(C=C2)OC)C(Cl)(Cl)Cl	1	3	3	2	Moderate	4.26637	In	10	0	NaN
1168	Methoxyfenozide	CC1=CC(=CC(=C1)C(=O)N(C(C)(C)C)NC(=O)C2=C(C(=CC=C2)OC)C)C	1	3	3	2	Moderate	4.26637	In	10	0	NaN
1169	Methoxyphenone	CC1=CC=CC(=C1)C(=O)C2=CC(=C(C=C2)OC)C	1	3	3	2	Moderate	4.26637	In	10	0	NaN
1170	Methyl (((1-(5-(2-chloro-4-(trifluoromethyl)phenoxy)-2-nitrophenyl)-2-methoxyethylidene)amino)oxy)acetate	COCC(=NOCC(=O)OC)c1cc(Oc2ccc(cc2Cl)C(F)(F)F)ccc1[N+](=O)[O-]	1	3	3	2	Moderate	4.26637	In	10	0	NaN
1171	Methyl ether cellulose	COC2OC(COC)[C@@H](O[C@@H]1OC(COC)C(OC)C(OC)C1OC)C(OC)C2OC	1	3	3	2	Moderate	4.26637	In	10	0	NaN
1172	Methyl isobutyl ketone	CC(C)CC(=O)C	1	3	3	2	Moderate	4.26637	In	10	0	NaN
1173	Methyl isothiocyanate	CN=C=S	1	3	3	2	Moderate	4.26637	In	10	0	NaN
1174	Methyl nonyl ketone	CCCCCCCCCC(=O)C	1	3	3	2	Moderate	4.26637	In	10	0	NaN
1176	Methylarsenic sulphide	C[As]=S	1	3	3	2	Moderate	4.26637	In	10	0	NaN
1177	Methylarsonic acid	C[As](=O)(O)O	1	3	3	2	Moderate	4.26637	In	10	0	NaN
1178	Methyldymron	CC(C)(C1=CC=CC=C1)NC(=O)N(C)C2=CC=CC=C2	1	3	3	2	Moderate	4.26637	In	10	0	NaN
1179	Methylene bisthiocyanate	C(SC#N)SC#N	1	3	3	2	Moderate	4.26637	In	10	0	NaN
1181	Methylmercury dicyanamide	C[Hg]N=C(N)NC#N	1	3	3	2	Moderate	4.26637	In	10	0	NaN
1183	Metobenzuron	CC1(CC(OC2=C1C=CC(=C2)OC3=CC=C(C=C3)NC(=O)N(C)OC)(C)OC)C	1	3	3	2	Moderate	4.26637	In	10	0	NaN
1184	Metobromuron	CN(C(=O)NC1=CC=C(C=C1)Br)OC	1	3	3	2	Moderate	4.26637	In	10	0	NaN
1186	Metolachlor	CCC1=CC=CC(=C1N(C(C)COC)C(=O)CCl)C	1	3	3	2	Moderate	4.26637	In	10	0	NaN
1187	Metolcarb	CC1=CC(=CC=C1)OC(=O)NC	1	3	3	2	Moderate	4.26637	In	10	0	NaN
1188	Metominostrobin	CNC(=O)C(=NOC)C1=CC=CC=C1OC2=CC=CC=C2	1	3	3	2	Moderate	4.26637	In	10	0	NaN
1190	Metoxadiazone	COC1=CC=CC=C1N2C(=O)OC(=N2)OC	1	3	3	2	Moderate	4.26637	In	10	0	NaN
1191	Metoxuron	CN(C)C(=O)NC1=CC(=C(C=C1)OC)Cl	1	3	3	2	Moderate	4.26637	In	10	0	NaN
1192	Metrafenone	CC1=CC(=C(C(=C1C(=O)C2=C(C=CC(=C2C)Br)OC)OC)OC)OC	1	3	3	2	Moderate	4.26637	In	10	0	NaN
1193	Metribuzin	CC(C)(C)C1=NN=C(N(C1=O)N)SC	1	3	3	2	Moderate	4.26637	In	10	0	NaN
1194	Metsulfovax	CC1=C(SC(=N1)C)C(=O)NC2=CC=CC=C2	1	3	3	2	Moderate	4.26637	In	10	0	NaN
1197	Metyltetraprole	CC1=C(C(=CC=C1)N2C(=O)N(N=N2)C)COC3=NN(C=C3)C4=CC=C(C=C4)Cl	1	3	3	2	Moderate	4.26637	In	10	0	NaN
1199	Mexacarbate	CC1=CC(=CC(=C1N(C)C)C)OC(=O)NC	1	3	3	2	Moderate	4.26637	In	10	0	NaN
1200	Mipafox	CC(C)NP(=O)(NC(C)C)F	1	3	3	2	Moderate	4.26637	In	10	0	NaN
1201	Mirex	C12(C3(C4(C5(C3(C(C1(C5(C2(C4(Cl)Cl)Cl)Cl)Cl)(Cl)Cl)Cl)Cl)Cl)Cl)Cl	1	3	3	2	Moderate	4.26637	In	10	0	NaN
1202	Mivorilaner	C1CC2=C(SC(=C2C1)C(=O)NCC(=O)NCC(F)F)C3=NOC(C3)(C4=CC(=C(C(=C4)Cl)F)Cl)C(F)(F)F	1	3	3	2	Moderate	4.26637	In	10	0	NaN
1203	Modoflaner	C1=CC(=C(C(=C1)NC(=O)C2=CN=C(C=C2)F)F)C(=O)NC3=C(C=C(C=C3I)C(C(F)(F)F)(C(F)(F)F)F)C(F)(F)F	1	3	3	2	Moderate	4.26637	In	10	0	NaN
1204	Molinate	CCSC(=O)N1CCCCCC1	1	3	3	2	Moderate	4.26637	In	10	0	NaN
1206	Monalide	CCCC(C)(C)C(=O)NC1=CC=C(C=C1)Cl	1	3	3	2	Moderate	4.26637	In	10	0	NaN
1208	Monolinuron	CN(C(=O)NC1=CC=C(C=C1)Cl)OC	1	3	3	2	Moderate	4.26637	In	10	0	NaN
1209	Monosodium methylarsonate	C[As](=O)(O)[O-]	1	3	3	2	Moderate	4.26637	In	10	0	NaN
1212	Monuron	CN(C)C(=O)NC1=CC=C(C=C1)Cl	1	3	3	2	Moderate	4.26637	In	10	0	NaN
1213	Monuron-TCA	CN(C)C(=O)NC1=CC=C(C=C1)Cl.C(=O)(C(Cl)(Cl)Cl)O	1	3	3	2	Moderate	4.26637	In	10	0	NaN
1214	Morfamquat	CC1COCC(N1C(=O)C[N+]2=CC=C(C=C2)C3=CC=[N+](C=C3)CC(=O)N4C(COCC4C)C)C	1	3	3	2	Moderate	4.26637	In	10	0	NaN
1215	Morfamquat dichloride	CC1COCC(N1C(=O)C[N+]2=CC=C(C=C2)C3=CC=[N+](C=C3)CC(=O)N4C(COCC4C)C)C	1	3	3	2	Moderate	4.26637	In	10	0	NaN
1218	Myclobutanil	CCCCC(CN1C=NC=N1)(C#N)C2=CC=C(C=C2)Cl	1	3	3	2	Moderate	4.26637	In	10	0	NaN
1219	Myclobutanil hydrochloride	CC(CCC(CN1C=NC=N1)(C#N)C2=CC=C(C=C2)Cl)O	1	3	3	2	Moderate	4.26637	In	10	0	NaN
1220	Myclozolin	CC1(C(=O)N(C(=O)O1)C2=CC(=CC(=C2)Cl)Cl)COC	1	3	3	2	Moderate	4.26637	In	10	0	NaN
1221	N-(3-chloro-2,6-dimethylphenyl)-2-methoxy-N-(tetrahydr-2-oxo-3-furanyl)acetamide	COCC(=O)N(C1CCOC1=O)c2c(C)ccc(Cl)c2C	1	3	3	2	Moderate	4.26637	In	10	0	NaN
1222	N,N-dimethyl capramide	CCCCCCCCCC(=O)N(C)C	1	3	3	2	Moderate	4.26637	In	10	0	NaN
1225	Naftalofos	CCOP(=O)(OCC)ON1C(=O)C2=CC=CC3=C2C(=CC=C3)C1=O	1	3	3	2	Moderate	4.26637	In	10	0	NaN
1226	Naled	COP(=O)(OC)OC(C(Cl)(Cl)Br)Br	1	3	3	2	Moderate	4.26637	In	10	0	NaN
1227	Nanosilver-silica composite	C1=CC=C2C=CC=CC2=C1	1	3	3	2	Moderate	4.26637	In	10	0	NaN
1228	Naphthalene	C1=CC=C2C=CC=CC2=C1	1	3	3	2	Moderate	4.26637	In	10	0	NaN
1229	Naproanilide	CC(C(=O)NC1=CC=CC=C1)OC2=CC3=CC=CC=C3C=C2	1	3	3	2	Moderate	4.26637	In	10	0	NaN
1230	Napropamide	CCN(CC)C(=O)C(C)OC1=CC=CC2=CC=CC=C21	1	3	3	2	Moderate	4.26637	In	10	0	NaN
1231	Napropamide-M	CCN(CC)C(=O)C(C)OC1=CC=CC2=CC=CC=C21	1	3	3	2	Moderate	4.26637	In	10	0	NaN
1232	Naptalam	C1=CC=C2C(=C1)C=CC=C2NC(=O)C3=CC=CC=C3C(=O)O	1	3	3	2	Moderate	4.26637	In	10	0	NaN
1233	Neburon	CCCCN(C)C(=O)NC1=CC(=C(C=C1)Cl)Cl	1	3	3	2	Moderate	4.26637	In	10	0	NaN
1234	Nickel bis(dimethyldithiocarbamate)	CN(C)C(=S)[S-].CN(C)C(=S)[S-]	1	3	3	2	Moderate	4.26637	In	10	0	NaN
1235	Niclosamide	C1=CC(=C(C=C1[N+](=O)[O-])Cl)NC(=O)C2=C(C=CC(=C2)Cl)O	1	3	3	2	Moderate	4.26637	In	10	0	NaN
1236	Nicofluprole	CN(C1CC1)C(=O)C2=C(N=CC(=C2)C3=CN(N=C3)C4=C(C=C(C=C4Cl)C(C(F)(F)F)(C(F)(F)F)F)Cl)Cl	1	3	3	2	Moderate	4.26637	In	10	0	NaN
1238	Nitenpyram	CCN(CC1=CN=C(C=C1)Cl)C(=C[N+](=O)[O-])NC	1	3	3	2	Moderate	4.26637	In	10	0	NaN
1239	Nithiazine	C1CNC(=C[N+](=O)[O-])SC1	1	3	3	2	Moderate	4.26637	In	10	0	NaN
1241	Nitrapyrin	C1=CC(=NC(=C1)Cl)C(Cl)(Cl)Cl	1	3	3	2	Moderate	4.26637	In	10	0	NaN
1242	Nitrilacarb	CC(C)(CCC#N)C=NOC(=O)NC	1	3	3	2	Moderate	4.26637	In	10	0	NaN
1243	Nitrofen	C1=CC(=CC=C1[N+](=O)[O-])OC2=C(C=C(C=C2)Cl)Cl	1	3	3	2	Moderate	4.26637	In	10	0	NaN
1244	Nitrothal-isopropyl	CC(C)OC(=O)C1=CC(=CC(=C1)[N+](=O)[O-])C(=O)OC(C)C	1	3	3	2	Moderate	4.26637	In	10	0	NaN
1245	N-methyl saccharine	CN1C(=O)C2=CC=CC=C2S1(=O)=O	1	3	3	2	Moderate	4.26637	In	10	0	NaN
1246	N-methyl-2-pyrrolidone	CN1CCCC1=O	1	3	3	2	Moderate	4.26637	In	10	0	NaN
1247	N-methylneodecanamide	CCC(C)(CCC(C)C)C(=O)NC	1	3	3	2	Moderate	4.26637	In	10	0	NaN
1248	N-nitrosodimethylamine	CN(C)N=O	1	3	3	2	Moderate	4.26637	In	10	0	NaN
1251	Nornicotine	C1CC(NC1)C2=CN=CC=C2	1	3	3	2	Moderate	4.26637	In	10	0	NaN
1252	Noruron	CN(C)C(=O)NC1CC2CC1C3C2CCC3	1	3	3	2	Moderate	4.26637	In	10	0	NaN
1253	Novaluron	C1=CC(=C(C(=C1)F)C(=O)NC(=O)NC2=CC(=C(C=C2)OC(C(OC(F)(F)F)F)(F)F)Cl)F	1	3	3	2	Moderate	4.26637	In	10	0	NaN
1254	Noviflumuron	C1=CC(=C(C(=C1)F)C(=O)NC(=O)NC2=CC(=C(C(=C2F)Cl)OC(C(C(F)(F)F)F)(F)F)Cl)F	1	3	3	2	Moderate	4.26637	In	10	0	NaN
1255	Nuarimol	C1=CC=C(C(=C1)C(C2=CC=C(C=C2)F)(C3=CN=CN=C3)O)Cl	1	3	3	2	Moderate	4.26637	In	10	0	NaN
1256	O,O'-DDT	C1=CC=C(C(=C1)C(C2=CC=CC=C2Cl)C(Cl)(Cl)Cl)Cl	1	3	3	2	Moderate	4.26637	In	10	0	NaN
1257	O,P'-DDT	C1=CC=C(C(=C1)C(C2=CC=C(C=C2)Cl)C(Cl)(Cl)Cl)Cl	1	3	3	2	Moderate	4.26637	In	10	0	NaN
1258	Octachlorodipropyl ether	CCC(OC(C(C(Cl)(Cl)Cl)(Cl)Cl)(Cl)Cl)Cl	1	3	3	2	Moderate	4.26637	In	10	0	NaN
[truncated: 353 more rows]

[truncated: 2 more sheets: PPDB_M4, PPDB_M5]
